# Supplementary material for: DFT Visualization and Experimental Evidence of BHT-Mg-Catalyzed Copolymerization of Lactides, Lactones and Ethylene Phosphates
Source: MDPI journal article supplement (doi:10.3390/polym11101641), 2019-10-10
Supplement: s1 [file s1]

# DFT Visualization and Experimental Evidence of BHT-Mg-Catalyzed Copolymerization of Lactides, Lactones and Ethylene Phosphates

Ilya Nifant'ev,<sup>1,2,\*</sup> Andrey Shlyakhtin<sup>1</sup>, Maxim Kosarev<sup>1</sup>, Dmitry Gavrilov<sup>1</sup>, Stanislav Karchevsky<sup>3</sup> and Pavel Ivchenko<sup>1,2</sup>

<sup>1</sup> Chemistry Department, M.V.Lomonosov Moscow State University, 1-3 Leninskie Gory, 119991 Moscow, Russia; shlyahtinav@mail.ru (A.S.); komrad.kosarev.maksim@gmail.com (M.K.); phpasha1@yandex.ru (P.I.),

<sup>2</sup> A.V. Topchiev Institute of Petrochemical Synthesis RAS, 29 Leninsky Pr., 119991 Moscow, Russia

<sup>3</sup> Joint-stock company "Institute of petroleum refining and petrochemistry", 12 Inicativnaya Str., 450065 Ufa, Republic of Bashkortostan, Russia; st\_karchevsky@mail.ru

\* Correspondence: ilnif@yahoo.com or inif@org.chem.msu.ru; Tel.: +7-495-939-4098

## SUPPORTING INFORMATION

|                                          |     |
|------------------------------------------|-----|
| S1. DFT calculations                     | 2   |
| S1.1. Monomers                           | 2   |
| S1.2. LC sequence, binuclear mechanism   | 5   |
| S1.3. CC sequence, mononuclear mechanism | 23  |
| S1.4. PP sequence, mononuclear mechanism | 38  |
| S1.5. CP sequence, mononuclear mechanism | 49  |
| S1.6. PC sequence, mononuclear mechanism | 62  |
| S1.7. LL sequence, mononuclear mechanism | 73  |
| S1.8. LP sequence, mononuclear mechanism | 84  |
| S1.9. PL sequence, mononuclear mechanism | 95  |
| S1.10. Transesterification of PP         | 110 |
| S2. Polymerization experiments           | 123 |

## S1. DFT calculations data: molecular structures, energies and cartesian coordinates

The data for all stationary points and transition states mentioned in the manuscript. Note that the data for monomers (S1.1),  $\epsilon$ -CL and MeOEP homopolymerization (S1.3. and S1.4, respectively) have been published previously [26,46,81].

### S1.1. Monomers

#### $\epsilon$ -CL

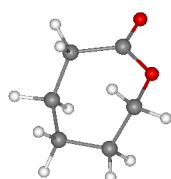

|                                              |                             |
|----------------------------------------------|-----------------------------|
| Zero-point vibrational energy                | 413924.6 (Joules/Mol)       |
|                                              | 98.93035 (Kcal/Mol)         |
| Zero-point correction=                       | 0.157656 (Hartree/Particle) |
| Thermal correction to Energy=                | 0.164853                    |
| Thermal correction to Enthalpy=              | 0.165798                    |
| Thermal correction to Gibbs Free Energy=     | 0.126149                    |
| Sum of electronic and zero-point Energies=   | -384.860246                 |
| Sum of electronic and thermal Energies=      | -384.853048                 |
| Sum of electronic and thermal Enthalpies=    | -384.852104                 |
| Sum of electronic and thermal Free Energies= | -384.891753                 |

|   |             |             |             | cartesian |             |             |             |
|---|-------------|-------------|-------------|-----------|-------------|-------------|-------------|
| 8 | -2.49640012 | 0.09650000  | -0.41440001 | 1         | 0.34410000  | 1.60000002  | -1.28910005 |
| 6 | -1.36909997 | -0.02400000 | 0.01080000  | 1         | -0.27320001 | 0.89160001  | 1.62860000  |
| 8 | -0.77679998 | -1.24290001 | -0.07160000 | 1         | -1.30460000 | 1.95330000  | 0.67290002  |
| 6 | -0.58899999 | 1.13250005  | 0.60570002  | 6         | 1.86199999  | 0.67570001  | -0.04630000 |
| 6 | 0.55019999  | -1.48150003 | 0.42449999  | 1         | 0.60909998  | -1.21550000 | 1.48740005  |
| 6 | 0.62889999  | 1.55929995  | -0.23090000 | 1         | 1.42149997  | -0.92960000 | -1.44739997 |
| 6 | 1.64820004  | -0.79979998 | -0.38229999 | 1         | 2.58159995  | -1.34459996 | -0.19520000 |
| 1 | 0.65160000  | -2.56620002 | 0.35339999  | 1         | 2.20040011  | 0.75480002  | 0.99610001  |
| 1 | 0.88940001  | 2.58470011  | 0.05370000  | 1         | 2.67910004  | 1.06920004  | -0.66170001 |

## L-LA

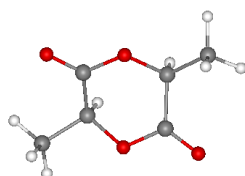

|                                              |                                              |
|----------------------------------------------|----------------------------------------------|
| Zero-point vibrational energy                | 370616.7 (Joules/Mol)<br>88.57951 (Kcal/Mol) |
| Zero-point correction=                       | 0.141160 (Hartree/Particle)                  |
| Thermal correction to Energy=                | 0.150579                                     |
| Thermal correction to Enthalpy=              | 0.151523                                     |
| Thermal correction to Gibbs Free Energy=     | 0.106579                                     |
| Sum of electronic and zero-point Energies=   | -534.087278                                  |
| Sum of electronic and thermal Energies=      | -534.077859                                  |
| Sum of electronic and thermal Enthalpies=    | -534.076915                                  |
| Sum of electronic and thermal Free Energies= | -534.121860                                  |

### cartesian

|   |             |             |             |   |             |             |             |
|---|-------------|-------------|-------------|---|-------------|-------------|-------------|
| 8 | -0.25319999 | -1.35280001 | -0.11950000 | 1 | -3.39499998 | -0.39100000 | 0.48490000  |
| 6 | -1.25360000 | -0.46730000 | 0.42940000  | 1 | -2.73480010 | -1.02769995 | -1.02980006 |
| 6 | 1.03890002  | -0.96079999 | -0.06110000 | 1 | -2.71370006 | -2.03559995 | 0.43599999  |
| 6 | -1.03890002 | 0.96079999  | -0.06120000 | 1 | 1.14250004  | 0.46200001  | 1.52349997  |
| 6 | -2.61220002 | -1.01740003 | 0.05490000  | 1 | 2.71329999  | 2.03600001  | 0.43540001  |
| 1 | -1.14269996 | -0.46180001 | 1.52359998  | 1 | 3.39499998  | 0.39160001  | 0.48590001  |
| 6 | 1.25360000  | 0.46730000  | 0.42940000  | 1 | 2.73539996  | 1.02680004  | -1.02960002 |
| 6 | 2.61220002  | 1.01740003  | 0.05500000  | 8 | 1.92960000  | -1.71019995 | -0.37459999 |
| 8 | 0.25319999  | 1.35270000  | -0.11990000 | 8 | -1.92960000 | 1.71029997  | -0.37439999 |

## MeOEP

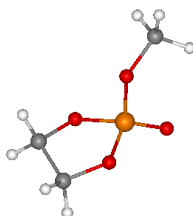

|                                          |                                              |
|------------------------------------------|----------------------------------------------|
| Zero-point vibrational energy            | 303039.1 (Joules/Mol)<br>72.42807 (Kcal/Mol) |
| Zero-point correction=                   | 0.115421 (Hartree/Particle)                  |
| Thermal correction to Energy=            | 0.123826                                     |
| Thermal correction to Enthalpy=          | 0.124770                                     |
| Thermal correction to Gibbs Free Energy= | 0.081434                                     |

|                                              |             |
|----------------------------------------------|-------------|
| Sum of electronic and zero-point Energies=   | -760.559526 |
| Sum of electronic and thermal Energies=      | -760.551121 |
| Sum of electronic and thermal Enthalpies=    | -760.550177 |
| Sum of electronic and thermal Free Energies= | -760.593513 |

| cartesian |             |             |             |   |             |                         |
|-----------|-------------|-------------|-------------|---|-------------|-------------------------|
| 8         | 1.01199996  | 1.91747999  | -0.66900665 | 1 | -2.53900003 | -0.69611996 -1.28200662 |
| 15        | 0.33869994  | 0.72608006  | -0.13230667 | 1 | -1.50830007 | -1.59751987 -0.13230667 |
| 8         | -0.78800011 | 0.88518006  | 1.01729333  | 8 | 1.31199992  | -0.35001999 0.54839331  |
| 8         | -0.57990009 | -0.08291996 | -1.20180666 | 6 | 2.68899989  | -0.42441994 0.12929332  |
| 6         | -2.06210017 | 0.40018004  | 0.56029332  | 1 | 3.11589980  | 0.57578003 0.03799333   |
| 6         | -1.74150014 | -0.60941994 | -0.54280668 | 1 | 2.76249981  | -0.95062000 -0.82600665 |
| 1         | -2.57720017 | -0.05011997 | 1.40999329  | 1 | 3.20859981  | -0.98942000 0.90299332  |
| 1         | -2.64270020 | 1.24588001  | 0.17999333  |   |             |                         |

## S1.2. LC sequence, binuclear mechanism

### I-1\_LC

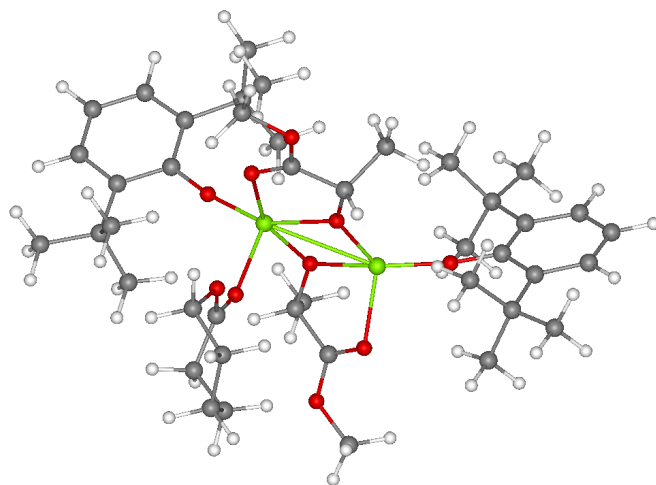

|                                              |                             |
|----------------------------------------------|-----------------------------|
| Zero-point vibrational energy                | 2702940.5 (Joules/Mol)      |
|                                              | 646.01829 (Kcal/Mol)        |
| Zero-point correction=                       | 1.029496 (Hartree/Particle) |
| Thermal correction to Energy=                | 1.093004                    |
| Thermal correction to Enthalpy=              | 1.093948                    |
| Thermal correction to Gibbs Free Energy=     | 0.926001                    |
| Sum of electronic and zero-point Energies=   | -2791.161249                |
| Sum of electronic and thermal Energies=      | -2791.097741                |
| Sum of electronic and thermal Enthalpies=    | -2791.096796                |
| Sum of electronic and thermal Free Energies= | -2791.264744                |

| cartesian |             |             |             |   |            |             |             |  |  |  |  |
|-----------|-------------|-------------|-------------|---|------------|-------------|-------------|--|--|--|--|
| 12        | -1.29932415 | -0.08807253 | 0.27690756  | 1 | 6.19297600 | 3.72722745  | 1.21070755  |  |  |  |  |
| 12        | 1.67837584  | 0.03872747  | -0.43909246 | 1 | 6.84967566 | 2.37932754  | 2.14260745  |  |  |  |  |
| 8         | -2.88052416 | -1.08357251 | -0.04679247 | 6 | 4.92237568 | 2.38472748  | -0.72739244 |  |  |  |  |
| 8         | 3.49627590  | -0.26527253 | -0.19529246 | 1 | 5.76547575 | 2.31842756  | -1.42409241 |  |  |  |  |
| 8         | -0.05022418 | -0.47627252 | -1.28979242 | 1 | 4.08747578 | 1.83242750  | -1.15959239 |  |  |  |  |
| 8         | 1.68627584  | 1.25552750  | -2.20109248 | 1 | 4.63807583 | 3.44222760  | -0.64449245 |  |  |  |  |
| 8         | 0.66347581  | 1.46302748  | -4.18579245 | 6 | 4.18777561 | 2.02972746  | 1.66990757  |  |  |  |  |
| 6         | -0.25562420 | -0.12067255 | -2.61529255 | 1 | 3.29257584 | 1.47602749  | 1.38370752  |  |  |  |  |
| 6         | -0.17412420 | -1.31647253 | -3.57279253 | 1 | 4.49407578 | 1.68292749  | 2.66320753  |  |  |  |  |
| 1         | -1.23572421 | 0.36192748  | -2.75829268 | 1 | 3.92997575 | 3.09382749  | 1.74900758  |  |  |  |  |
| 6         | 0.78507584  | 0.92992753  | -2.98069263 | 6 | 4.83037567 | -4.45317268 | -0.75949246 |  |  |  |  |
| 6         | 1.67627585  | 2.41482759  | -4.57479239 | 1 | 5.67487574 | -4.44207287 | -1.45669246 |  |  |  |  |
| 1         | 1.40827584  | 2.72262740  | -5.58369255 | 1 | 5.18137598 | -4.84357262 | 0.20150754  |  |  |  |  |
| 1         | 2.65957570  | 1.94262755  | -4.56239271 | 1 | 4.09417582 | -5.16497278 | -1.14959240 |  |  |  |  |

|   |             |             |             |   |             |             |             |
|---|-------------|-------------|-------------|---|-------------|-------------|-------------|
| 6 | -3.93402410 | -1.88177252 | -0.10859247 | 6 | 2.98617578  | -3.25327253 | 0.34820756  |
| 6 | -5.21152401 | -1.35957253 | -0.50549245 | 1 | 2.45847583  | -2.31757259 | 0.53970754  |
| 6 | -6.30742407 | -2.22457242 | -0.57029247 | 1 | 2.26637578  | -3.97747254 | -0.05089247 |
| 1 | -7.27852440 | -1.84467244 | -0.86999243 | 1 | 3.34147573  | -3.62687254 | 1.31490755  |
| 6 | -6.20202398 | -3.57577252 | -0.26129246 | 6 | 3.67507577  | -2.68547249 | -2.03049254 |
| 6 | -4.96482420 | -4.08047295 | 0.12350753  | 1 | 4.51347589  | -2.66987252 | -2.73549247 |
| 1 | -4.89862442 | -5.13707256 | 0.36070755  | 1 | 2.94057584  | -3.41497254 | -2.39299250 |
| 6 | -3.82342410 | -3.27817249 | 0.20930754  | 1 | 3.22037578  | -1.69317245 | -2.04549265 |
| 6 | -5.39882421 | 0.12762748  | -0.85649246 | 1 | -7.07102442 | -4.22677279 | -0.32049245 |
| 6 | -2.48612428 | -3.91127253 | 0.63570756  | 1 | 8.39237595  | -1.72547245 | 0.94900757  |
| 6 | -6.84272432 | 0.46312749  | -1.27149248 | 1 | 1.67427576  | 3.26872754  | -3.89549255 |
| 1 | -7.15812397 | -0.09197253 | -2.16119266 | 1 | -0.34592420 | -1.01427245 | -4.60979271 |
| 1 | -7.56272411 | 0.26662749  | -0.47009245 | 1 | -0.94012421 | -2.03737259 | -3.28149247 |
| 1 | -6.90952396 | 1.53082752  | -1.51389241 | 1 | 0.80167580  | -1.80437243 | -3.49699259 |
| 6 | -5.08052397 | 1.00202751  | 0.37250754  | 8 | 0.53277582  | 0.24012746  | 1.13790751  |
| 1 | -5.17872429 | 2.06832743  | 0.12170753  | 8 | -1.75272417 | 0.29522747  | 2.38000751  |
| 1 | -5.78632402 | 0.78602749  | 1.18250751  | 8 | -0.83182418 | 0.74212754  | 4.37730742  |
| 1 | -4.07492399 | 0.81562752  | 0.74930757  | 6 | 0.65077579  | 0.44322747  | 2.50670743  |
| 6 | -4.50152397 | 0.51032752  | -2.04989266 | 6 | 1.48687577  | -0.63387251 | 3.20590734  |
| 1 | -4.78872442 | -0.06237253 | -2.93879247 | 1 | 1.10067582  | 1.42502749  | 2.72960734  |
| 1 | -4.61112404 | 1.57712746  | -2.28959250 | 6 | -0.75922418 | 0.48712748  | 3.07700753  |
| 1 | -3.45322418 | 0.30292749  | -1.83609247 | 6 | -2.15512419 | 0.73782754  | 4.95080757  |
| 6 | -2.60442424 | -5.42187262 | 0.90720755  | 1 | -2.77602410 | 1.49882746  | 4.47530746  |
| 1 | -3.30572414 | -5.64677286 | 1.71800756  | 1 | -2.61892414 | -0.24087255 | 4.81900740  |
| 1 | -2.91582417 | -5.97977257 | 0.01770753  | 1 | -2.01192403 | 0.95832753  | 6.00710726  |
| 1 | -1.62442422 | -5.80997276 | 1.20790756  | 1 | 1.57417583  | -0.43837252 | 4.27830744  |
| 6 | -1.99052417 | -3.27487254 | 1.94950759  | 1 | 2.48747587  | -0.64187247 | 2.76790738  |
| 1 | -1.94262421 | -2.18777251 | 1.87990761  | 1 | 1.03957582  | -1.62087250 | 3.05840755  |
| 1 | -2.67602420 | -3.51627254 | 2.76990747  | 8 | -1.67612422 | 1.88772750  | -0.42379245 |
| 1 | -0.99712420 | -3.65827250 | 2.21500754  | 6 | -2.02112412 | 3.02252746  | -0.11489246 |
| 6 | -1.43522418 | -3.75307250 | -0.48029244 | 6 | -2.35272408 | 4.05212736  | -1.16509247 |
| 1 | -1.25542414 | -2.70957255 | -0.73909247 | 8 | -2.07042408 | 3.33622742  | 1.17680752  |
| 1 | -0.48152420 | -4.20107269 | -0.17449246 | 6 | -1.39252424 | 5.25542736  | -1.18559241 |
| 1 | -1.77092421 | -4.26887274 | -1.38739240 | 1 | -3.38452411 | 4.39502716  | -1.02109241 |
| 6 | 4.74117565  | -0.63677251 | 0.07610753  | 1 | -2.32252407 | 3.51982760  | -2.11619258 |
| 6 | 5.14377594  | -2.00097251 | -0.08949247 | 6 | -2.53562427 | 4.62742710  | 1.63860750  |
| 6 | 6.45717573  | -2.35337257 | 0.23460753  | 1 | -0.35792419 | 4.89832735  | -1.12049246 |
| 1 | 6.78337574  | -3.38217258 | 0.12360753  | 1 | -1.48932421 | 5.73482704  | -2.16509247 |
| 6 | 7.37837601  | -1.42157245 | 0.70050758  | 1 | -3.54062414 | 4.81082726  | 1.24420750  |
| 6 | 6.98787594  | -0.09347253 | 0.83380753  | 1 | -2.62252426 | 4.48152733  | 2.71570754  |
| 1 | 7.72397566  | 0.62182748  | 1.18590760  | 6 | -1.66392422 | 6.29822731  | -0.10239246 |

|   |            |             |             |   |             |            |             |
|---|------------|-------------|-------------|---|-------------|------------|-------------|
| 6 | 5.69247580 | 0.33382750  | 0.52690756  | 1 | -2.66202426 | 6.72672749 | -0.26449245 |
| 6 | 4.17087603 | -3.06917238 | -0.62099242 | 1 | -0.95502418 | 7.12492704 | -0.21899246 |
| 6 | 5.32697582 | 1.82522750  | 0.65160757  | 6 | -1.58002424 | 5.76892710 | 1.32880759  |
| 6 | 6.50817585 | 2.67922759  | 1.14610755  | 1 | -0.56072420 | 5.44392729 | 1.56870759  |
| 1 | 7.36277580 | 2.63892746  | 0.46280757  | 1 | -1.81512415 | 6.58342743 | 2.02390742  |

### I-1c\_LC

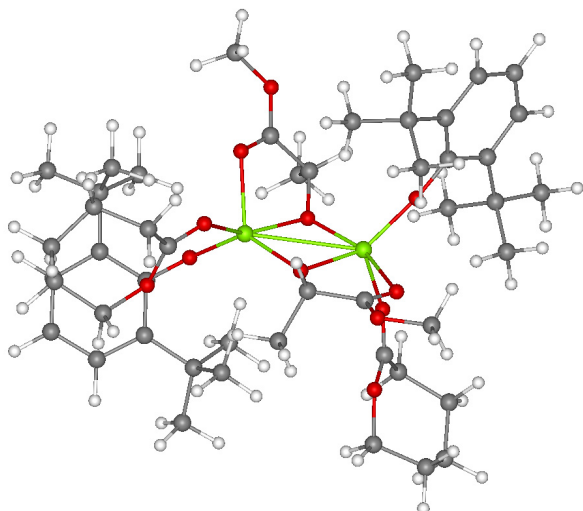

|                                              |                             |
|----------------------------------------------|-----------------------------|
| Zero-point vibrational energy                | 3121106.5 (Joules/Mol)      |
|                                              | 745.96236 (Kcal/Mol)        |
| Zero-point correction=                       | 1.188767 (Hartree/Particle) |
| Thermal correction to Energy=                | 1.260893                    |
| Thermal correction to Enthalpy=              | 1.261838                    |
| Thermal correction to Gibbs Free Energy=     | 1.076890                    |
| Sum of electronic and zero-point Energies=   | -3176.031992                |
| Sum of electronic and thermal Energies=      | -3175.959865                |
| Sum of electronic and thermal Enthalpies=    | -3175.958921                |
| Sum of electronic and thermal Free Energies= | -3176.143869                |

| cartesian |             |             |             |   |            |             |             |
|-----------|-------------|-------------|-------------|---|------------|-------------|-------------|
| 12        | -1.12493479 | -0.62537104 | -0.02796813 | 1 | 6.87866497 | 1.21532893  | -2.77986813 |
| 12        | 1.88406515  | 0.12092903  | 0.35233185  | 1 | 7.75796509 | -0.00697098 | -1.85756803 |
| 8         | -2.57043457 | 0.16362903  | -1.05466807 | 6 | 4.38136530 | 0.27232900  | -2.51996803 |
| 8         | 3.42436504  | -1.00177097 | 0.13943186  | 1 | 4.36896515 | -0.42497095 | -3.36526799 |
| 8         | 0.61606514  | -0.45347098 | -1.08866799 | 1 | 3.42936516 | 0.18942903  | -1.99726796 |
| 8         | -0.92373478 | -2.57457089 | -0.94016814 | 1 | 4.46046495 | 1.28962898  | -2.92636800 |
| 8         | 0.15176520  | -3.63957095 | -2.59706807 | 6 | 5.64456511 | 0.98212898  | -0.43596816 |
| 8         | 0.12746519  | 0.10702901  | 1.39893198  | 1 | 4.78506517 | 0.89902896  | 0.22933185  |
| 8         | 2.49246550  | 0.70662898  | 2.36933208  | 1 | 6.54976511 | 0.81282896  | 0.15823185  |
| 8         | 1.79416513  | 0.62772900  | 4.50123167  | 1 | 5.68946505 | 2.00622916  | -0.83066815 |

|   |             |             |             |   |             |             |             |
|---|-------------|-------------|-------------|---|-------------|-------------|-------------|
| 6 | 0.86076522  | -1.40207100 | -2.07086802 | 6 | 3.61686516  | -5.04387093 | 1.97563195  |
| 6 | 0.66026521  | -0.85107100 | -3.48876810 | 1 | 3.51756525  | -5.78757095 | 1.17733192  |
| 1 | 1.88486516  | -1.80297101 | -1.99696803 | 1 | 4.60286522  | -5.16417074 | 2.43663192  |
| 6 | -0.05823481 | -2.58837080 | -1.81756806 | 1 | 2.86776543  | -5.28427076 | 2.73923206  |
| 6 | -0.68433475 | -4.78827095 | -2.36536813 | 6 | 3.48506546  | -2.68527079 | 2.70223188  |
| 1 | -0.55203485 | -5.14977074 | -1.34406805 | 1 | 3.39056540  | -1.63847101 | 2.41293192  |
| 1 | -1.73183489 | -4.53207111 | -2.53036809 | 1 | 2.70606518  | -2.92837095 | 3.43773198  |
| 6 | 0.16336519  | 0.21562903  | 2.77763200  | 1 | 4.45886517  | -2.81497097 | 3.18843198  |
| 1 | -0.07423481 | -0.74587101 | 3.26603198  | 6 | 1.95336521  | -3.58037090 | 0.89613187  |
| 6 | 1.59386516  | 0.54272896  | 3.18913198  | 1 | 1.87796521  | -4.26487112 | 0.04333187  |
| 6 | 3.14866543  | 0.89162898  | 4.91753197  | 1 | 1.22016513  | -3.89607096 | 1.64893198  |
| 1 | 3.11916542  | 0.90212899  | 6.00593185  | 1 | 1.67846513  | -2.58357096 | 0.55183184  |
| 1 | 3.48116541  | 1.85722899  | 4.53183174  | 1 | -7.38053465 | 2.19562912  | -1.48136806 |
| 6 | -3.75413465 | 0.70062900  | -1.27866805 | 1 | 7.18136501  | -4.42417097 | -1.15986800 |
| 6 | -4.84553480 | -0.09107098 | -1.78646803 | 1 | 3.81356525  | 0.10622901  | 4.55543184  |
| 6 | -6.12633467 | 0.46992901  | -1.82086802 | 1 | -0.35213482 | -5.53607082 | -3.08376813 |
| 1 | -6.96543503 | -0.12697098 | -2.16416812 | 1 | 0.84456515  | -1.61517107 | -4.24946833 |
| 6 | -6.37243462 | 1.78862894  | -1.45056808 | 1 | 1.36456513  | -0.02967098 | -3.63826799 |
| 6 | -5.28853464 | 2.59802914  | -1.12426805 | 1 | -0.35293481 | -0.45847097 | -3.60666800 |
| 1 | -5.47793484 | 3.64832902  | -0.92686814 | 6 | -0.78323483 | 1.28022897  | 3.34863186  |
| 6 | -3.98073483 | 2.10612917  | -1.06796801 | 1 | -0.73893476 | 1.30422902  | 4.44163179  |
| 6 | -4.63453484 | -1.51337099 | -2.34176803 | 1 | -1.80533481 | 1.05482900  | 3.03913188  |
| 6 | -2.81723452 | 3.08632898  | -0.82606816 | 1 | -0.52853477 | 2.26882911  | 2.95803189  |
| 6 | -5.88273478 | -2.05227089 | -3.06456804 | 8 | 1.71316516  | 3.78922915  | 0.87113184  |
| 1 | -6.73213482 | -2.19937086 | -2.38806796 | 6 | 2.14686537  | 3.27112913  | -0.27836815 |
| 1 | -6.20363474 | -1.39617097 | -3.88056803 | 6 | 2.53006506  | 4.17012930  | -1.42726803 |
| 1 | -5.64953470 | -3.03057098 | -3.50066805 | 1 | 1.66086519  | 4.76972914  | -1.72426808 |
| 6 | -3.50013494 | -1.49607098 | -3.38516808 | 6 | 1.51196516  | 5.21092892  | 1.04243195  |
| 1 | -3.33293486 | -2.50357080 | -3.78776813 | 1 | 0.99796522  | 5.26882887  | 2.00253201  |
| 1 | -3.76293468 | -0.84037101 | -4.22286844 | 6 | 2.80306530  | 6.01452923  | 1.07733202  |
| 1 | -2.57173491 | -1.13097107 | -2.94716811 | 1 | 0.82246518  | 5.57512903  | 0.27323186  |
| 6 | -4.30923462 | -2.51227093 | -1.21886802 | 1 | 3.52556515  | 5.48252916  | 1.70763195  |
| 1 | -5.15083504 | -2.57947087 | -0.51886815 | 6 | 3.39706516  | 6.32012892  | -0.29696813 |
| 1 | -4.14263487 | -3.51647091 | -1.62976801 | 1 | 2.58166504  | 6.95872927  | 1.58883202  |
| 1 | -3.41703463 | -2.22447085 | -0.66696817 | 1 | 2.75746536  | 3.49822903  | -2.25496793 |
| 6 | -3.27433491 | 4.55612898  | -0.87086815 | 6 | 3.73176527  | 5.08652925  | -1.13386798 |
| 1 | -3.75893450 | 4.80992889  | -1.81956804 | 1 | 4.52536535  | 4.50232887  | -0.65466815 |
| 1 | -3.96093464 | 4.80872917  | -0.05536813 | 1 | 4.13506508  | 5.41462898  | -2.09736800 |
| 1 | -2.39853477 | 5.20792913  | -0.76406813 | 1 | 2.69116545  | 6.94902897  | -0.85596812 |
| 6 | -1.75423479 | 2.92162919  | -1.93086803 | 1 | 4.30466509  | 6.92022896  | -0.16876814 |
| 1 | -1.34663486 | 1.91062903  | -1.95366812 | 8 | 2.24286509  | 2.05592918  | -0.36586815 |



|   |             |             |             |   |             |             |            |
|---|-------------|-------------|-------------|---|-------------|-------------|------------|
| 1 | -2.18813467 | 3.13972902  | -2.91306806 | 8 | -3.93443489 | -0.21407098 | 1.81663203 |
| 1 | -0.92823482 | 3.62762904  | -1.76766801 | 6 | -3.29003477 | -1.32057106 | 2.15543199 |
| 6 | -2.18493462 | 2.86102915  | 0.55503184  | 6 | -3.81803465 | -2.21857095 | 3.24633193 |
| 1 | -1.77333486 | 1.85822904  | 0.65363187  | 1 | -3.93753481 | -1.63307106 | 4.16693163 |
| 1 | -1.36723483 | 3.57252908  | 0.72913188  | 6 | -5.19763470 | 0.18552904  | 2.40143204 |
| 1 | -2.92783451 | 3.00272918  | 1.34833193  | 1 | -5.38333464 | 1.14502895  | 1.91883194 |
| 6 | 4.39496517  | -1.84977102 | -0.15226814 | 6 | -6.34333467 | -0.77237099 | 2.12213206 |
| 6 | 4.41276503  | -3.17017078 | 0.41713184  | 1 | -5.05413485 | 0.35582903  | 3.47563195 |
| 6 | 5.41596508  | -4.06177092 | 0.02713187  | 1 | -6.31883478 | -1.03107095 | 1.05843198 |
| 1 | 5.43026495  | -5.06747103 | 0.43443185  | 6 | -6.37473488 | -2.01817107 | 3.00673199 |
| 6 | 6.41706514  | -3.70687079 | -0.87036812 | 1 | -7.26893473 | -0.20527098 | 2.27523208 |
| 6 | 6.43536520  | -2.41017079 | -1.37186801 | 1 | -3.03563452 | -2.95777082 | 3.42373204 |
| 1 | 7.23786497  | -2.13647079 | -2.04866815 | 6 | -5.14373493 | -2.91707087 | 2.89803195 |
| 6 | 5.46446514  | -1.46427107 | -1.03126800 | 1 | -5.07103491 | -3.34887099 | 1.89403200 |
| 6 | 3.38016510  | -3.60897088 | 1.47213197  | 1 | -5.26043463 | -3.76017094 | 3.58723187 |
| 6 | 5.57266521  | -0.03467098 | -1.59276807 | 1 | -6.49633503 | -1.70857108 | 4.05413151 |
| 6 | 6.84486532  | 0.17512903  | -2.43436813 | 1 | -7.26473475 | -2.60767078 | 2.75953197 |
| 1 | 6.86776495  | -0.46127096 | -3.32556796 | 8 | -2.24503469 | -1.58527100 | 1.56383193 |

## TS-12\_LC

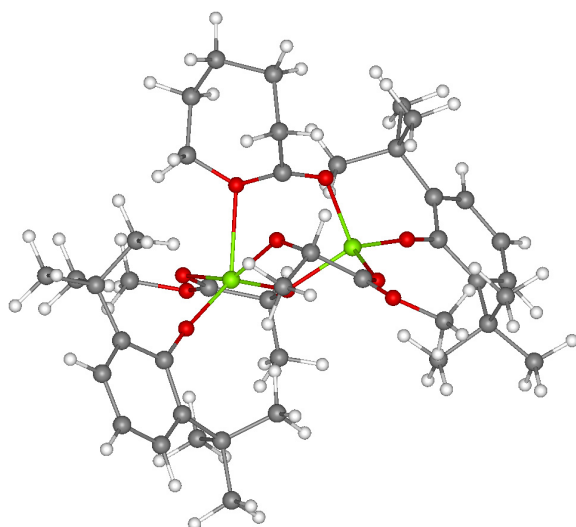

|                                            |                             |
|--------------------------------------------|-----------------------------|
| Zero-point vibrational energy              | 2702706.9 (Joules/Mol)      |
|                                            | 645.96245 (Kcal/Mol)        |
| Zero-point correction=                     | 1.029407 (Hartree/Particle) |
| Thermal correction to Energy=              | 1.091539                    |
| Thermal correction to Enthalpy=            | 1.092483                    |
| Thermal correction to Gibbs Free Energy=   | 0.929877                    |
| Sum of electronic and zero-point Energies= | -2791.136244                |
| Sum of electronic and thermal Energies=    | -2791.074112                |
| Sum of electronic and thermal Enthalpies=  | -2791.073167                |

Sum of electronic and thermal Free Energies= -2791.235774

| cartesian |             |             |             |   |             |             |             |
|-----------|-------------|-------------|-------------|---|-------------|-------------|-------------|
| 12        | 1.71657324  | -0.04279250 | -0.57503676 | 1 | -6.79682684 | 3.04540753  | -0.01013676 |
| 12        | -1.43102682 | 0.35830751  | 0.34796324  | 1 | -7.30182695 | 1.71920753  | -1.05573678 |
| 8         | 3.54487324  | -0.27829251 | -0.30373675 | 6 | -4.94552660 | 1.85910749  | 1.46476328  |
| 8         | -3.15132689 | -0.38309249 | 0.59086323  | 1 | -5.62112665 | 1.55390751  | 2.27166319  |
| 8         | 0.41207317  | -0.27179250 | 0.89276320  | 1 | -3.95522690 | 1.46590745  | 1.69456327  |
| 8         | -1.27572680 | 1.18320751  | 2.31186318  | 1 | -4.90332699 | 2.95650744  | 1.46326327  |
| 8         | -0.01552683 | 1.08120751  | 4.16436338  | 6 | -4.60312700 | 1.87600756  | -1.04673672 |
| 6         | 0.75107312  | -0.13379250 | 2.24496317  | 1 | -3.58682680 | 1.47900748  | -1.01103675 |
| 6         | 0.83517313  | -1.47649252 | 2.97816324  | 1 | -5.03602695 | 1.58550751  | -2.01073670 |
| 1         | 1.71957314  | 0.37500751  | 2.36546326  | 1 | -4.55972672 | 2.97330761  | -1.02003670 |
| 6         | -0.27602684 | 0.77270752  | 2.90556335  | 6 | -3.68892670 | -4.75629234 | 1.17276323  |
| 6         | -0.98302692 | 1.91170752  | 4.83996344  | 1 | -4.53852701 | -4.89559269 | 1.84906328  |
| 1         | -0.61192685 | 2.01380754  | 5.85776329  | 1 | -3.93822670 | -5.21149254 | 0.20816323  |
| 1         | -1.96282685 | 1.43250751  | 4.82916307  | 1 | -2.84532690 | -5.31909227 | 1.58826327  |
| 6         | 4.77327299  | -0.46189249 | 0.17036323  | 6 | -2.06762671 | -3.24519253 | 0.10206324  |
| 6         | 5.54307318  | 0.65360749  | 0.63486320  | 1 | -1.66532683 | -2.23799253 | -0.01083677 |
| 6         | 6.79867315  | 0.40960750  | 1.20036328  | 1 | -1.26402676 | -3.87969255 | 0.49516323  |
| 1         | 7.39177322  | 1.23690748  | 1.57496333  | 1 | -2.33792686 | -3.62089252 | -0.89123678 |
| 6         | 7.33077335  | -0.87109250 | 1.29626322  | 6 | -2.90402675 | -2.79359245 | 2.45016336  |
| 6         | 6.60927296  | -1.94019246 | 0.77746320  | 1 | -3.75722671 | -2.89339256 | 3.13006330  |
| 1         | 7.05517340  | -2.92789245 | 0.82736319  | 1 | -2.08252692 | -3.39969254 | 2.85256338  |
| 6         | 5.34787321  | -1.77399254 | 0.19796324  | 1 | -2.60362673 | -1.74429250 | 2.44316316  |
| 6         | 5.04377317  | 2.10480762  | 0.49286327  | 1 | 8.30687332  | -1.03099251 | 1.74766326  |
| 6         | 4.63277340  | -2.98669243 | -0.42763674 | 1 | -7.71632671 | -2.74429250 | -0.43583676 |
| 6         | 6.08127308  | 3.13160753  | 0.98266321  | 1 | -1.04472685 | 2.88680744  | 4.35396338  |
| 1         | 6.29877329  | 3.02960753  | 2.05136323  | 1 | 1.10957313  | -1.33659256 | 4.02726316  |
| 1         | 7.02387333  | 3.06080747  | 0.43026325  | 1 | 1.59997320  | -2.08749247 | 2.49626327  |
| 1         | 5.68727303  | 4.14240742  | 0.82656324  | 1 | -0.11812682 | -2.00609255 | 2.92246318  |
| 6         | 4.77537298  | 2.42600751  | -0.99173677 | 8 | -1.07622683 | 0.60030752  | -1.61673677 |
| 1         | 4.40187311  | 3.45210743  | -1.10003674 | 8 | 0.91757315  | -1.27339256 | -2.01073670 |
| 1         | 5.70307302  | 2.34310746  | -1.56863678 | 8 | -0.15942682 | -2.10129261 | -3.77653670 |
| 1         | 4.04287338  | 1.74690747  | -1.42823672 | 6 | -1.13682687 | -0.16899250 | -2.76903677 |
| 6         | 3.77477312  | 2.34110761  | 1.33316326  | 6 | -2.52582693 | -0.77259248 | -3.00253677 |
| 1         | 3.96667314  | 2.12580752  | 2.39026332  | 1 | -0.90022689 | 0.45470750  | -3.65033674 |
| 1         | 3.44707322  | 3.38510752  | 1.25256324  | 6 | -0.03442683 | -1.22979248 | -2.79193664 |
| 1         | 2.95087314  | 1.70910752  | 1.00016332  | 6 | 0.87947315  | -3.09829259 | -3.90243673 |
| 6         | 5.47627306  | -4.27189255 | -0.35163677 | 1 | 1.83937323  | -2.61719251 | -4.09343672 |
| 1         | 6.43377304  | -4.17099237 | -0.87323678 | 1 | 0.94087315  | -3.69039249 | -2.98903680 |

|   |             |             |             |   |             |             |             |
|---|-------------|-------------|-------------|---|-------------|-------------|-------------|
| 1 | 5.67697334  | -4.57879257 | 0.68026322  | 1 | 0.57937312  | -3.71599245 | -4.74643660 |
| 1 | 4.92827320  | -5.09079266 | -0.83163679 | 1 | -2.55472684 | -1.35999250 | -3.92323661 |
| 6 | 4.37407303  | -2.71949244 | -1.92423677 | 1 | -3.24752688 | 0.04160750  | -3.08143663 |
| 1 | 3.76957321  | -1.82379246 | -2.07243681 | 1 | -2.82612681 | -1.40359247 | -2.16403675 |
| 1 | 5.32287312  | -2.57939243 | -2.45363665 | 8 | 1.22317314  | 1.69040751  | -1.45193672 |
| 1 | 3.85757327  | -3.57439256 | -2.37973666 | 6 | 0.07177316  | 2.18160748  | -1.47063673 |
| 6 | 3.31297326  | -3.29319239 | 0.30446324  | 6 | -0.36612684 | 2.99220753  | -2.66583681 |
| 1 | 2.62667322  | -2.44639254 | 0.27896324  | 8 | -0.47642687 | 2.47390747  | -0.22923677 |
| 1 | 2.80717325  | -4.15379238 | -0.15113677 | 6 | 0.23677316  | 4.40840769  | -2.64813662 |
| 1 | 3.50757313  | -3.53679252 | 1.35476327  | 1 | -1.45582676 | 3.02870750  | -2.74063683 |
| 6 | -4.32192659 | -0.97569251 | 0.39376324  | 1 | 0.01377317  | 2.45670748  | -3.53833675 |
| 6 | -4.44342661 | -2.40099239 | 0.50646323  | 6 | -1.33742678 | 3.62790751  | -0.05513677 |
| 6 | -5.66732693 | -2.99769258 | 0.18826324  | 1 | 1.29267323  | 4.34370756  | -2.36333680 |
| 1 | -5.77142668 | -4.07609272 | 0.24256323  | 1 | 0.21647316  | 4.79700756  | -3.67193675 |
| 6 | -6.77892685 | -2.25239253 | -0.18823677 | 1 | -2.22542691 | 3.52880740  | -0.68693680 |
| 6 | -6.68222666 | -0.86579251 | -0.20403677 | 1 | -1.65712678 | 3.53670740  | 0.98396319  |
| 1 | -7.57102680 | -0.29629251 | -0.45393676 | 6 | -0.51072687 | 5.38540745  | -1.74133670 |
| 6 | -5.49022675 | -0.19869250 | 0.09386324  | 1 | -1.52322686 | 5.53570747  | -2.13953662 |
| 6 | -3.29052687 | -3.27529240 | 1.03736329  | 1 | -0.01792683 | 6.36320734  | -1.78743672 |
| 6 | -5.46882677 | 1.34160745  | 0.10906324  | 6 | -0.62092686 | 4.95310736  | -0.27833676 |
| 6 | -6.86932659 | 1.95360756  | -0.07743676 | 1 | 0.36807317  | 4.89620733  | 0.19116323  |
| 1 | -7.56972694 | 1.62370753  | 0.69676322  | 1 | -1.18222678 | 5.71780729  | 0.27206326  |

## I-2\_LC

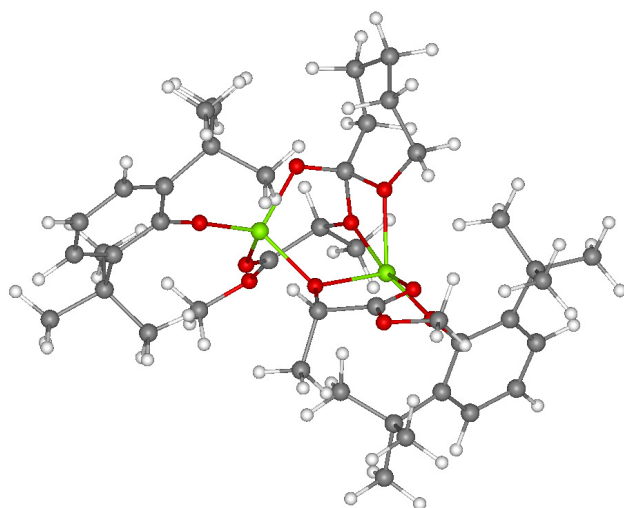

Zero-point vibrational energy

2706139.2 (Joules/Mol)

646.78280 (Kcal/Mol)

Zero-point correction=

1.030714 (Hartree/Particle)

Thermal correction to Energy=

1.092950

Thermal correction to Enthalpy=

1.093894

|                                              |              |
|----------------------------------------------|--------------|
| Thermal correction to Gibbs Free Energy=     | 0.932805     |
| Sum of electronic and zero-point Energies=   | -2791.141338 |
| Sum of electronic and thermal Energies=      | -2791.079102 |
| Sum of electronic and thermal Enthalpies=    | -2791.078157 |
| Sum of electronic and thermal Free Energies= | -2791.239246 |

| cartesian |             |             |             |   |             |             |             |  |  |  |  |
|-----------|-------------|-------------|-------------|---|-------------|-------------|-------------|--|--|--|--|
| 12        | -1.65489089 | 0.10832592  | -0.60988498 | 1 | 6.42560911  | -3.58597422 | 0.03031500  |  |  |  |  |
| 12        | 1.43380904  | -0.48197407 | 0.49941498  | 1 | 7.03100920  | -2.33637404 | -1.05478501 |  |  |  |  |
| 8         | -3.47919083 | 0.28642592  | -0.28138500 | 6 | 4.75140905  | -2.19807410 | 1.53451502  |  |  |  |  |
| 8         | 3.16860914  | 0.21312591  | 0.67711502  | 1 | 5.48440933  | -1.96077418 | 2.31361508  |  |  |  |  |
| 8         | -0.38359100 | 0.30502594  | 0.91441500  | 1 | 3.81860924  | -1.69837415 | 1.79661500  |  |  |  |  |
| 8         | 1.10980904  | -1.22967410 | 2.46311498  | 1 | 4.58740902  | -3.28327417 | 1.54991496  |  |  |  |  |
| 8         | -0.22469100 | -0.95467407 | 4.24431515  | 6 | 4.33190918  | -2.21587420 | -0.96718502 |  |  |  |  |
| 6         | -0.76729101 | 0.28062594  | 2.26001501  | 1 | 3.36130905  | -1.72187412 | -0.91168499 |  |  |  |  |
| 6         | -0.68279099 | 1.65832591  | 2.92781496  | 1 | 4.76260900  | -1.98397410 | -1.94788504 |  |  |  |  |
| 1         | -1.79729092 | -0.08777409 | 2.37671494  | 1 | 4.17590904  | -3.30157423 | -0.91858500 |  |  |  |  |
| 6         | 0.12550899  | -0.70807409 | 2.99481511  | 6 | 4.17310905  | 4.50142574  | 1.19891500  |  |  |  |  |
| 6         | 0.62380898  | -1.85447419 | 4.98881531  | 1 | 5.05370903  | 4.55802584  | 1.84671497  |  |  |  |  |
| 1         | 0.19010898  | -1.89747417 | 5.98581505  | 1 | 4.43680906  | 4.92202568  | 0.22241500  |  |  |  |  |
| 1         | 1.64280903  | -1.46687412 | 5.02391529  | 1 | 3.40550923  | 5.15062571  | 1.63511503  |  |  |  |  |
| 6         | -4.73509073 | 0.40662593  | 0.13511500  | 6 | 2.37270927  | 3.15282583  | 0.19351499  |  |  |  |  |
| 6         | -5.46679068 | -0.74597406 | 0.56891501  | 1 | 1.86960900  | 2.18862581  | 0.10831501  |  |  |  |  |
| 6         | -6.76079082 | -0.56727409 | 1.06831503  | 1 | 1.65050900  | 3.86932588  | 0.60451502  |  |  |  |  |
| 1         | -7.32799101 | -1.42377412 | 1.41631496  | 1 | 2.64900923  | 3.49112582  | -0.81178498 |  |  |  |  |
| 6         | -7.36349106 | 0.68362594  | 1.13151503  | 6 | 3.22890925  | 2.63902593  | 2.51961493  |  |  |  |  |
| 6         | -6.67079067 | 1.78942585  | 0.65211499  | 1 | 4.10580921  | 2.66062593  | 3.17581511  |  |  |  |  |
| 1         | -7.16769075 | 2.75322580  | 0.68001497  | 1 | 2.48120928  | 3.32552576  | 2.93661499  |  |  |  |  |
| 6         | -5.37409067 | 1.68892586  | 0.13941500  | 1 | 2.82700920  | 1.62422585  | 2.53321505  |  |  |  |  |
| 6         | -4.88309097 | -2.16827416 | 0.46641499  | 1 | -8.36929131 | 0.79232591  | 1.53001499  |  |  |  |  |
| 6         | -4.68309069 | 2.94142580  | -0.43178502 | 1 | 7.91550922  | 2.07182598  | -0.52848500 |  |  |  |  |
| 6         | -5.88029099 | -3.24607420 | 0.92991501  | 1 | 0.62140900  | -2.84207416 | 4.52491522  |  |  |  |  |
| 1         | -6.15229082 | -3.13807416 | 1.98551500  | 1 | -1.00659096 | 1.61212587  | 3.97121501  |  |  |  |  |
| 1         | -6.79929066 | -3.24187422 | 0.33481500  | 1 | -1.33769095 | 2.34502578  | 2.38921499  |  |  |  |  |
| 1         | -5.42139101 | -4.23437452 | 0.81201500  | 1 | 0.33730900  | 2.04672575  | 2.88491488  |  |  |  |  |
| 6         | -4.53669071 | -2.49187422 | -1.00118494 | 8 | 1.13110900  | -0.44267407 | -1.65878499 |  |  |  |  |
| 1         | -4.11959076 | -3.50387406 | -1.08168495 | 8 | -0.75819099 | 1.62712586  | -1.71488500 |  |  |  |  |
| 1         | -5.43989086 | -2.45247412 | -1.61978495 | 8 | 0.51380897  | 2.71832585  | -3.18688512 |  |  |  |  |
| 1         | -3.81329083 | -1.78947413 | -1.41578496 | 6 | 1.13250899  | 0.46712592  | -2.74368501 |  |  |  |  |
| 6         | -3.63759089 | -2.32267404 | 1.35991502  | 6 | 2.56680918  | 0.85042590  | -3.08658504 |  |  |  |  |
| 1         | -3.88299084 | -2.10367417 | 2.40511489  | 1 | 0.66660899  | -0.01177408 | -3.61568499 |  |  |  |  |

---

|   |             |             |             |   |             |             |             |
|---|-------------|-------------|-------------|---|-------------|-------------|-------------|
| 1 | -3.25209093 | -3.34887409 | 1.31101501  | 6 | 0.21020900  | 1.65352583  | -2.46878505 |
| 1 | -2.83799076 | -1.64707410 | 1.05241501  | 6 | -0.35999101 | 3.86262584  | -3.04778504 |
| 6 | -5.58609104 | 4.18702555  | -0.38168502 | 1 | -1.37629092 | 3.59352589  | -3.33708501 |
| 1 | -6.50849104 | 4.05362558  | -0.95638502 | 1 | -0.34879100 | 4.21182585  | -2.01518512 |
| 1 | -5.85509062 | 4.46502542  | 0.64291501  | 1 | 0.05080899  | 4.61542559  | -3.71738505 |
| 1 | -5.05009079 | 5.03772545  | -0.81798500 | 1 | 2.59470916  | 1.55062592  | -3.92348504 |
| 6 | -4.33369064 | 2.71292591  | -1.91638505 | 1 | 3.11180925  | -0.05417408 | -3.36238503 |
| 1 | -3.68269086 | 1.84782588  | -2.04878497 | 1 | 3.06810927  | 1.29872584  | -2.22698498 |
| 1 | -5.24479103 | 2.53992581  | -2.49918509 | 8 | -1.01439095 | -1.34057415 | -1.79978502 |
| 1 | -3.83339071 | 3.59802580  | -2.33068490 | 6 | 0.23290899  | -1.67987418 | -1.75708497 |
| 6 | -3.41849089 | 3.28832579  | 0.37621498  | 6 | 0.73070902  | -2.58327413 | -2.88588500 |
| 1 | -2.69839072 | 2.47002578  | 0.36701500  | 8 | 0.65450901  | -2.18097425 | -0.42908502 |
| 1 | -2.92889094 | 4.17992544  | -0.03558500 | 6 | -0.22909100 | -3.73497415 | -3.19498491 |
| 1 | -3.67839074 | 3.49932575  | 1.41951501  | 1 | 1.74140906  | -2.93777418 | -2.65888500 |
| 6 | 4.39080906  | 0.67282593  | 0.43941501  | 1 | 0.81070900  | -1.96697414 | -3.78658509 |
| 6 | 4.66170931  | 2.07792592  | 0.53331500  | 6 | 0.67010897  | -3.58747411 | -0.12038500 |
| 6 | 5.92800903  | 2.54242587  | 0.16451499  | 1 | -1.23629093 | -3.31757402 | -3.29028511 |
| 1 | 6.14450932  | 3.60482597  | 0.20111500  | 1 | 0.03650899  | -4.15487432 | -4.17198467 |
| 6 | 6.94190931  | 1.68202591  | -0.24148500 | 1 | 1.64270902  | -4.00077438 | -0.41658500 |
| 6 | 6.70320940  | 0.31242591  | -0.23408501 | 1 | 0.61950898  | -3.61037421 | 0.97061497  |
| 1 | 7.51910925  | -0.34967408 | -0.50398499 | 6 | -0.22549102 | -4.86127424 | -2.16218495 |
| 6 | 5.46020937  | -0.22527409 | 0.11371500  | 1 | 0.73320901  | -5.39637423 | -2.20868492 |
| 6 | 3.62140918  | 3.06822586  | 1.09131503  | 1 | -0.99419099 | -5.59227419 | -2.43828511 |
| 6 | 5.28130913  | -1.75497413 | 0.15461500  | 6 | -0.46199101 | -4.41387415 | -0.71818501 |
| 6 | 6.60620928  | -2.50877404 | -0.06028500 | 1 | -1.40559089 | -3.86757421 | -0.62448502 |
| 1 | 7.35940933  | -2.23867416 | 0.68721497  | 1 | -0.55099100 | -5.30847454 | -0.08928500 |

---

### TS-23\_LC

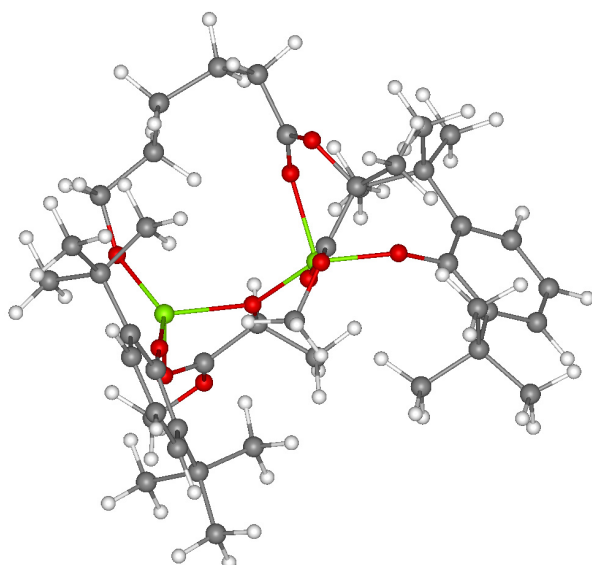

|                                              |                             |
|----------------------------------------------|-----------------------------|
| Zero-point vibrational energy                | 2700224.7 (Joules/Mol)      |
|                                              | 645.36920 (Kcal/Mol)        |
| Zero-point correction=                       | 1.028461 (Hartree/Particle) |
| Thermal correction to Energy=                | 1.091343                    |
| Thermal correction to Enthalpy=              | 1.092287                    |
| Thermal correction to Gibbs Free Energy=     | 0.929516                    |
| Sum of electronic and zero-point Energies=   | -2791.110764                |
| Sum of electronic and thermal Energies=      | -2791.047882                |
| Sum of electronic and thermal Enthalpies=    | -2791.046938                |
| Sum of electronic and thermal Free Energies= | -2791.209709                |

| cartesian |             |             |             |   |             |             |             |
|-----------|-------------|-------------|-------------|---|-------------|-------------|-------------|
| 12        | 1.08600318  | 0.24337737  | 0.04757904  | 1 | -5.62019682 | 3.39997721  | -1.46772099 |
| 12        | -1.92779672 | 0.36827737  | 2.00847888  | 1 | -5.35489655 | 2.23697710  | -2.76722097 |
| 8         | 2.81670332  | -0.22502263 | -0.51302099 | 6 | -5.15259695 | 1.87597740  | 0.66537905  |
| 8         | -3.09209681 | -0.36762264 | 0.72177905  | 1 | -6.15329695 | 1.45887744  | 0.82217902  |
| 8         | 0.08590332  | -0.11182262 | 1.67387903  | 1 | -4.48649693 | 1.45337749  | 1.41737902  |
| 8         | -1.55179679 | -0.85022265 | 3.66227913  | 1 | -5.20799685 | 2.95787716  | 0.83567905  |
| 8         | 0.14360332  | -1.23502254 | 5.07457924  | 6 | -3.27749681 | 2.18887711  | -1.00642097 |
| 6         | 0.71430337  | -0.48972264 | 2.87567902  | 1 | -2.52429676 | 1.70957744  | -0.37822098 |
| 6         | 1.70510328  | -1.64362252 | 2.69587898  | 1 | -2.98079681 | 2.07177711  | -2.05642104 |
| 1         | 1.24400318  | 0.36607736  | 3.32327914  | 1 | -3.28469682 | 3.26117730  | -0.77822095 |
| 6         | -0.34619668 | -0.87532270 | 3.89887905  | 6 | -3.74049687 | -4.71992254 | 0.18927902  |
| 6         | -0.82639664 | -1.55652261 | 6.09527922  | 1 | -4.81889677 | -4.90792274 | 0.22097903  |
| 1         | -0.24049668 | -1.79282260 | 6.98137951  | 1 | -3.36929679 | -5.00642252 | -0.80102098 |
| 1         | -1.42489672 | -2.41472268 | 5.78657913  | 1 | -3.27159667 | -5.39202261 | 0.91677904  |
| 6         | 4.00960302  | -0.80262268 | -0.32462096 | 6 | -1.85559678 | -3.15992284 | 0.51267904  |
| 6         | 5.05800343  | -0.09002262 | 0.34117904  | 1 | -1.50869679 | -2.15832281 | 0.76527905  |
| 6         | 6.26690340  | -0.75242269 | 0.58027905  | 1 | -1.40759683 | -3.87142277 | 1.21807909  |
| 1         | 7.07020330  | -0.24032263 | 1.09827900  | 1 | -1.47979677 | -3.40632272 | -0.48712099 |
| 6         | 6.48640347  | -2.06082273 | 0.16827902  | 6 | -3.91559672 | -3.03082275 | 1.98207903  |
| 6         | 5.48790312  | -2.72252274 | -0.53582096 | 1 | -4.99879694 | -3.19002271 | 2.02107906  |
| 1         | 5.68890333  | -3.73172283 | -0.87802094 | 1 | -3.44579673 | -3.73412275 | 2.68117905  |
| 6         | 4.25290346  | -2.12712288 | -0.81182098 | 1 | -3.71179676 | -2.01782274 | 2.32837915  |
| 6         | 4.91090345  | 1.38547742  | 0.76587903  | 1 | 7.43380308  | -2.55242276 | 0.37527904  |
| 6         | 3.21490312  | -2.89932275 | -1.65082097 | 1 | -6.10559654 | -2.21432281 | -3.14092088 |
| 6         | 6.21070337  | 1.95627749  | 1.36377907  | 1 | -1.47669673 | -0.69942266 | 6.27447939  |
| 1         | 6.50250340  | 1.44817746  | 2.28877902  | 1 | 2.18010330  | -1.90452254 | 3.64497900  |
| 1         | 7.04780340  | 1.90157747  | 0.66047901  | 1 | 2.49430323  | -1.35862255 | 1.99477899  |
| 1         | 6.05930328  | 3.01327729  | 1.60967898  | 1 | 1.19460320  | -2.52552271 | 2.29987907  |
| 6         | 4.57630301  | 2.25337720  | -0.46362096 | 8 | 0.56600332  | 2.70737720  | -2.63292098 |

---

|   |             |             |             |   |             |             |             |
|---|-------------|-------------|-------------|---|-------------|-------------|-------------|
| 1 | 4.44360304  | 3.30227733  | -0.16972098 | 8 | -0.16379668 | -0.13352263 | -1.54732096 |
| 1 | 5.39210320  | 2.20787716  | -1.19312096 | 8 | -0.91129667 | 0.02747737  | -3.64652085 |
| 1 | 3.66420317  | 1.90657747  | -0.95002091 | 6 | 0.97310340  | 1.37867749  | -3.06212091 |
| 6 | 3.83490324  | 1.55317748  | 1.85497904  | 6 | 1.25790322  | 1.46687746  | -4.54572058 |
| 1 | 4.07650328  | 0.94737732  | 2.73457909  | 1 | 1.87300324  | 1.09887743  | -2.50342107 |
| 1 | 3.76380324  | 2.59967732  | 2.17347908  | 6 | -0.10089668 | 0.35487735  | -2.67782092 |
| 1 | 2.84480333  | 1.25597739  | 1.50567901  | 6 | -1.92029679 | -0.98822272 | -3.35852098 |
| 6 | 3.75170326  | -4.25142241 | -2.15472102 | 1 | -2.44359684 | -1.13182259 | -4.29992056 |
| 1 | 4.64630318  | -4.13562250 | -2.77532101 | 1 | -1.42279673 | -1.90262258 | -3.03682089 |
| 1 | 3.98610306  | -4.93992233 | -1.33632100 | 1 | -2.59789681 | -0.63372266 | -2.58182096 |
| 1 | 2.98590326  | -4.73392248 | -2.77222085 | 1 | 1.58190322  | 0.49287736  | -4.91852093 |
| 6 | 2.84730315  | -2.08362269 | -2.90572095 | 1 | 2.06110334  | 2.18717718  | -4.71542072 |
| 1 | 2.47010326  | -1.09992254 | -2.62602091 | 1 | 0.37140331  | 1.77887750  | -5.09982061 |
| 1 | 3.72830319  | -1.94122255 | -3.54092097 | 8 | 0.98420334  | 2.26727724  | -0.45842099 |
| 1 | 2.08430314  | -2.60672283 | -3.49602103 | 6 | 0.74420333  | 3.06887722  | -1.35572100 |
| 6 | 1.95410323  | -3.21532273 | -0.82622099 | 6 | 0.68490332  | 4.56127739  | -1.18952096 |
| 1 | 1.45900321  | -2.31342268 | -0.46492094 | 8 | -2.02479672 | 2.00597715  | 2.88157892  |
| 1 | 1.22730327  | -3.77252269 | -1.42892098 | 6 | 0.62490332  | 5.07077742  | 0.24927902  |
| 1 | 2.20600319  | -3.82792282 | 0.04537904  | 1 | -0.15419668 | 4.93007755  | -1.78902102 |
| 6 | -3.90489674 | -0.83322269 | -0.20702097 | 1 | 1.58650327  | 4.93087769  | -1.69812095 |
| 6 | -4.04229689 | -2.24922276 | -0.40742096 | 6 | -1.97659671 | 3.37567711  | 2.71537900  |
| 6 | -4.82359695 | -2.70322275 | -1.47402096 | 1 | 1.45000327  | 4.62867737  | 0.81737906  |
| 1 | -4.92409658 | -3.76892281 | -1.65152097 | 1 | 0.82910335  | 6.14597750  | 0.20857903  |
| 6 | -5.50209665 | -1.83112252 | -2.32142091 | 1 | -2.77009678 | 3.72977710  | 2.02717900  |
| 6 | -5.43369675 | -0.46422264 | -2.07252097 | 1 | -2.17599678 | 3.88587713  | 3.67557907  |
| 1 | -6.00619698 | 0.20007737  | -2.71152091 | 6 | -0.71869665 | 4.79997730  | 0.96027905  |
| 6 | -4.66359663 | 0.06607737  | -1.03122091 | 1 | -1.42879677 | 4.36547756  | 0.24507904  |
| 6 | -3.39159679 | -3.26502275 | 0.55007905  | 1 | -1.17079675 | 5.74887753  | 1.27257907  |
| 6 | -4.67489672 | 1.58397746  | -0.77182096 | 6 | -0.61119664 | 3.86097717  | 2.16257906  |
| 6 | -5.63689661 | 2.33207726  | -1.71252096 | 1 | -0.06039668 | 2.96287727  | 1.86397898  |
| 1 | -6.67069674 | 1.98897743  | -1.60052097 | 1 | -0.01089668 | 4.33877754  | 2.94867897  |

---

# I-3\_LC

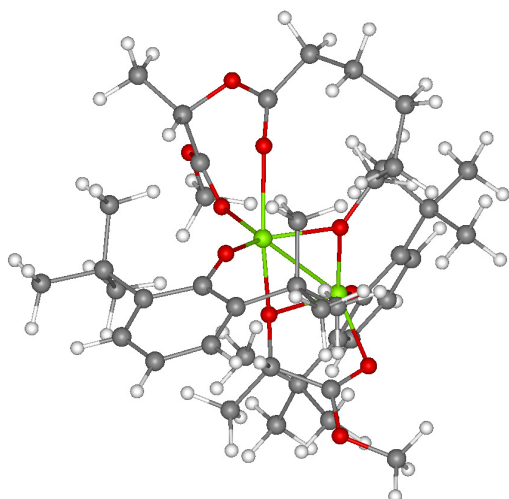

|                                              |                             |
|----------------------------------------------|-----------------------------|
| Zero-point vibrational energy                | 2705348.6 (Joules/Mol)      |
|                                              | 646.59384 (Kcal/Mol)        |
| Zero-point correction=                       | 1.030413 (Hartree/Particle) |
| Thermal correction to Energy=                | 1.093067                    |
| Thermal correction to Enthalpy=              | 1.094011                    |
| Thermal correction to Gibbs Free Energy=     | 0.932463                    |
| Sum of electronic and zero-point Energies=   | -2791.143767                |
| Sum of electronic and thermal Energies=      | -2791.081113                |
| Sum of electronic and thermal Enthalpies=    | -2791.080169                |
| Sum of electronic and thermal Free Energies= | -2791.241717                |

| cartesian |             |             |             |   |            |             |             |  |  |  |  |
|-----------|-------------|-------------|-------------|---|------------|-------------|-------------|--|--|--|--|
| 12        | -1.17284894 | 0.46157163  | 0.05415335  | 1 | 3.42635083 | 3.18437171  | -1.35194671 |  |  |  |  |
| 12        | 1.44325101  | -0.68472838 | -0.76404667 | 1 | 2.97565079 | 1.78487158  | -0.35844666 |  |  |  |  |
| 8         | -3.01134920 | 0.00067163  | 0.15125336  | 6 | 5.96015072 | 2.51137161  | -1.91524673 |  |  |  |  |
| 8         | 3.24725080  | -0.59282833 | -0.27964664 | 1 | 6.42765093 | 3.04017162  | -1.07814670 |  |  |  |  |
| 8         | -0.15884900 | -1.29292846 | 0.26915336  | 1 | 6.74635077 | 2.00717163  | -2.48684669 |  |  |  |  |
| 8         | 0.94865096  | -2.39032841 | -1.87644672 | 1 | 5.51615095 | 3.26927161  | -2.57104659 |  |  |  |  |
| 8         | -0.46814901 | -4.12502861 | -1.87624669 | 6 | 4.26225090 | 0.92267162  | -2.73194671 |  |  |  |  |
| 6         | -0.66224903 | -2.54612827 | -0.07014666 | 1 | 5.03515100 | 0.38497165  | -3.29154658 |  |  |  |  |
| 6         | -0.44624901 | -3.58912826 | 1.03415334  | 1 | 3.46725082 | 0.20977162  | -2.50714660 |  |  |  |  |
| 1         | -1.74104893 | -2.50292826 | -0.28594664 | 1 | 3.85745072 | 1.70507157  | -3.38604665 |  |  |  |  |
| 6         | 0.01075100  | -3.01022840 | -1.35724664 | 6 | 5.06435061 | -3.67292833 | 2.35585332  |  |  |  |  |
| 6         | 0.15635100  | -4.59752846 | -3.08844662 | 1 | 5.87185097 | -4.16922855 | 1.80775332  |  |  |  |  |
| 1         | -0.37344900 | -5.51282835 | -3.34464669 | 1 | 5.49865103 | -3.15982819 | 3.22055340  |  |  |  |  |
| 1         | 1.21425104  | -4.79782867 | -2.91264677 | 1 | 4.40345097 | -4.45752859 | 2.74145341  |  |  |  |  |
| 6         | -4.04824924 | -0.82142836 | 0.23915336  | 6 | 3.12715077 | -2.15082836 | 2.35195327  |  |  |  |  |
| 6         | -4.68224907 | -1.32152843 | -0.94674665 | 1 | 2.45785069 | -1.48932838 | 1.80095327  |  |  |  |  |



|   |             |             |             |   |             |             |             |
|---|-------------|-------------|-------------|---|-------------|-------------|-------------|
| 6 | -5.68714905 | -2.28462839 | -0.81214666 | 1 | 2.52685070  | -2.95982838 | 2.78575325  |
| 1 | -6.15774918 | -2.69992828 | -1.69714665 | 1 | 3.56465077  | -1.58282840 | 3.18165326  |
| 6 | -6.12624931 | -2.72892833 | 0.43055335  | 6 | 3.66765070  | -3.58522820 | 0.32435337  |
| 6 | -5.59114933 | -2.15172839 | 1.57715333  | 1 | 4.47765064  | -4.06572866 | -0.23574665 |
| 1 | -5.98694944 | -2.46222830 | 2.53855324  | 1 | 3.02535081  | -4.37772846 | 0.72945333  |
| 6 | -4.57984924 | -1.18832839 | 1.52045333  | 1 | 3.08845091  | -2.99062824 | -0.38274664 |
| 6 | -4.32594919 | -0.78212833 | -2.34594679 | 1 | -6.90334940 | -3.48582840 | 0.50375336  |
| 6 | -4.09564924 | -0.51372838 | 2.81815338  | 1 | 8.35735035  | -0.52302837 | 0.90605330  |
| 6 | -5.25484943 | -1.33922839 | -3.44044662 | 1 | 0.04815099  | -3.85392833 | -3.87944674 |
| 1 | -5.15564919 | -2.42322826 | -3.56294656 | 1 | -0.86854905 | -4.55882835 | 0.75645334  |
| 1 | -6.30714941 | -1.11022842 | -3.24284673 | 1 | -0.94464904 | -3.23492837 | 1.93775332  |
| 1 | -4.99424934 | -0.88032836 | -4.40094662 | 1 | 0.61835098  | -3.70542836 | 1.25125337  |
| 6 | -4.49404907 | 0.75127167  | -2.36704659 | 8 | 0.30655101  | 0.83517164  | -1.26484668 |
| 1 | -4.22504902 | 1.15107155  | -3.35334659 | 6 | -1.32824898 | 3.75177169  | 0.02375335  |
| 1 | -5.53824902 | 1.01887155  | -2.17014670 | 6 | -1.29814899 | 4.84867144  | -1.00834668 |
| 1 | -3.87434912 | 1.23237157  | -1.60904670 | 6 | -0.62944901 | 2.25587177  | -3.02234674 |
| 6 | -2.89354920 | -1.16902840 | -2.75824666 | 6 | 0.50255096  | 2.00767159  | -2.01724672 |
| 1 | -2.78454924 | -2.25932837 | -2.78324676 | 8 | -1.76694894 | 2.62437177  | -0.13374664 |
| 1 | -2.66284919 | -0.78412837 | -3.75924659 | 1 | 0.60475099  | 2.87477160  | -1.34394670 |
| 1 | -2.14544916 | -0.76772839 | -2.07274675 | 1 | -0.27654901 | 5.24487162  | -1.03864670 |
| 6 | -4.94014931 | -0.91562837 | 4.04095316  | 8 | -0.83574903 | 4.18607140  | 1.20235336  |
| 1 | -5.99934912 | -0.67222834 | 3.90735340  | 8 | -0.02214901 | 1.23337162  | 1.69885337  |
| 1 | -4.85854912 | -1.98252845 | 4.27315331  | 8 | 1.10425103  | 2.53837180  | 3.12395334  |
| 1 | -4.58404922 | -0.36732838 | 4.92105341  | 6 | -1.01684892 | 3.33897161  | 2.36655331  |
| 6 | -4.22914934 | 1.01747155  | 2.68465328  | 6 | -1.01294899 | 4.24177122  | 3.58125329  |
| 1 | -3.68974924 | 1.38617158  | 1.81005335  | 1 | -1.96834898 | 2.81187177  | 2.26385331  |
| 1 | -5.28174925 | 1.29787159  | 2.56785321  | 6 | 0.06925099  | 2.26187181  | 2.35875344  |
| 1 | -3.85134912 | 1.51427162  | 3.58915329  | 6 | 2.17105079  | 1.55337155  | 3.15695333  |
| 6 | -2.64344931 | -0.90952837 | 3.14355326  | 1 | 1.77745104  | 0.59917164  | 3.50665331  |
| 1 | -1.95734894 | -0.70322835 | 2.32165337  | 1 | 2.60275078  | 1.43517160  | 2.16365337  |
| 1 | -2.28604913 | -0.37582836 | 4.03445339  | 1 | 2.90305090  | 1.95547163  | 3.85345340  |
| 1 | -2.58384919 | -1.98222840 | 3.35765338  | 1 | -1.14484894 | 3.64747167  | 4.48855352  |
| 6 | 4.54455090  | -0.58302838 | 0.01305335  | 1 | -1.84294891 | 4.94807148  | 3.50755334  |
| 6 | 5.10325098  | -1.58482838 | 0.87275332  | 1 | -0.07684901 | 4.79617167  | 3.66045332  |
| 6 | 6.46825075  | -1.52842844 | 1.17085338  | 1 | 1.45745099  | 1.95697153  | -2.55724669 |
| 1 | 6.90795088  | -2.27682829 | 1.82125330  | 1 | -1.90244901 | 5.66107130  | -0.58474666 |
| 6 | 7.29905081  | -0.53952837 | 0.65755332  | 6 | -1.81324899 | 4.49037123  | -2.40514660 |
| 6 | 6.75525093  | 0.42447165  | -0.18294664 | 1 | -0.41214901 | 1.70017159  | -3.94164658 |
| 1 | 7.41645098  | 1.18677163  | -0.58084667 | 6 | -0.86874902 | 3.73487163  | -3.35364676 |
| 6 | 5.39915085  | 0.43497163  | -0.52314669 | 1 | -1.55304897 | 1.82627153  | -2.62344670 |
| 6 | 4.24835062  | -2.72222829 | 1.46175337  | 1 | -2.75124931 | 3.93307161  | -2.30804658 |

|   |            |            |             |   |             |            |             |
|---|------------|------------|-------------|---|-------------|------------|-------------|
| 6 | 4.86065102 | 1.53857160 | -1.45174670 | 1 | -2.07344913 | 5.44117165 | -2.88454676 |
| 6 | 3.81585073 | 2.38977170 | -0.70374668 | 1 | 0.08935099  | 4.26917124 | -3.42604661 |
| 1 | 4.27705097 | 2.86667180 | 0.16905336  | 1 | -1.31584895 | 3.80117178 | -4.35204649 |

#### I-4\_LC

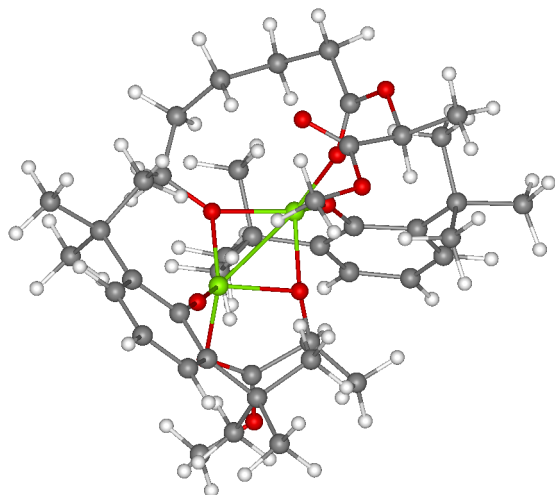

|                                              |                             |
|----------------------------------------------|-----------------------------|
| Zero-point vibrational energy                | 2705362.1 (Joules/Mol)      |
|                                              | 646.59707 (Kcal/Mol)        |
| Zero-point correction=                       | 1.030418 (Hartree/Particle) |
| Thermal correction to Energy=                | 1.093424                    |
| Thermal correction to Enthalpy=              | 1.094368                    |
| Thermal correction to Gibbs Free Energy=     | 0.931135                    |
| Sum of electronic and zero-point Energies=   | -2791.147590                |
| Sum of electronic and thermal Energies=      | -2791.084584                |
| Sum of electronic and thermal Enthalpies=    | -2791.083640                |
| Sum of electronic and thermal Free Energies= | -2791.246873                |

| cartesian |             |             |             |   |             |             |             |
|-----------|-------------|-------------|-------------|---|-------------|-------------|-------------|
| 12        | 1.34161520  | 0.34419581  | 0.42331010  | 1 | -3.21248484 | 1.01079571  | 3.49460983  |
| 12        | -1.18218482 | -1.16100430 | 0.36841011  | 1 | -2.81448483 | 0.71969587  | 1.78861010  |
| 8         | 3.21521521  | 0.17199580  | 0.35571012  | 6 | -5.63348532 | -0.12190420 | 3.58470988  |
| 8         | -3.02098489 | -1.01010430 | 0.10571011  | 1 | -6.20078516 | 0.79059589  | 3.37310982  |
| 8         | 0.30591515  | -0.69970411 | -0.92188984 | 1 | -6.34048510 | -0.95140415 | 3.69160986  |
| 8         | -0.49798486 | -3.08500409 | -0.08728988 | 1 | -5.14578485 | 0.01769580  | 4.55600977  |
| 8         | 0.90381515  | -4.17940378 | -1.44938982 | 6 | -3.80778480 | -1.66410422 | 2.98940992  |
| 6         | 0.87881517  | -1.78120422 | -1.59758985 | 1 | -4.50248528 | -2.50490403 | 3.09080982  |
| 6         | 0.58081514  | -1.75960422 | -3.10029006 | 1 | -3.03378487 | -1.96930420 | 2.28260994  |
| 1         | 1.97301507  | -1.80170429 | -1.46778989 | 1 | -3.33988476 | -1.49470425 | 3.96680999  |
| 6         | 0.36491516  | -3.07440424 | -0.97358984 | 6 | -5.02748489 | -1.71590424 | -3.78948998 |
| 6         | 0.43391514  | -5.42530394 | -0.88958985 | 1 | -5.75548506 | -2.52410412 | -3.66329002 |

|   |             |             |             |   |             |             |             |
|---|-------------|-------------|-------------|---|-------------|-------------|-------------|
| 1 | 0.99241519  | -6.20020390 | -1.41058981 | 1 | -5.56928492 | -0.80430412 | -4.06399012 |
| 1 | -0.63708484 | -5.53340387 | -1.06508982 | 1 | -4.39048529 | -1.98250425 | -4.64049006 |
| 6 | 4.34301472  | -0.33470419 | -0.14768989 | 6 | -3.14948487 | -0.39720419 | -2.89229012 |
| 6 | 4.95131493  | -1.48370421 | 0.45561013  | 1 | -2.44728494 | -0.19870420 | -2.08169007 |
| 6 | 6.07861471  | -2.04170418 | -0.15548989 | 1 | -2.57458496 | -0.65840411 | -3.78939009 |
| 1 | 6.54261494  | -2.92530417 | 0.26981011  | 1 | -3.68748474 | 0.53229582  | -3.10889006 |
| 6 | 6.64621496  | -1.49540424 | -1.30068982 | 6 | -3.41258478 | -2.85570407 | -2.31318998 |
| 6 | 6.10291481  | -0.33120421 | -1.83058989 | 1 | -4.13688517 | -3.66370416 | -2.16219020 |
| 1 | 6.58561468  | 0.10639581  | -2.69799018 | 1 | -2.80018497 | -3.11450410 | -3.18689013 |
| 6 | 4.97421503  | 0.28199580  | -1.27728987 | 1 | -2.77168489 | -2.81910419 | -1.43198991 |
| 6 | 4.43211508  | -2.08290410 | 1.77681017  | 1 | 7.51921511  | -1.95500422 | -1.75748980 |
| 6 | 4.46331501  | 1.60519576  | -1.87968981 | 1 | -8.22908592 | -0.64250416 | -0.39998990 |
| 6 | 5.30591488  | -3.24710417 | 2.27760983  | 1 | 0.63861513  | -5.45430374 | 0.18141012  |
| 1 | 5.29851484  | -4.10040379 | 1.59061015  | 1 | 1.07311511  | -2.58870411 | -3.61539006 |
| 1 | 6.34521484  | -2.94420409 | 2.44010997  | 1 | 0.95321512  | -0.81830412 | -3.50879002 |
| 1 | 4.91651487  | -3.60130405 | 3.23880982  | 1 | -0.49518484 | -1.80940425 | -3.27969003 |
| 6 | 4.46601486  | -1.00360429 | 2.87700987  | 8 | -0.00658486 | -0.30800420 | 1.71731019  |
| 1 | 4.03871489  | -1.38900423 | 3.81130981  | 6 | 0.89531517  | 3.47769594  | 0.52011013  |
| 1 | 5.49941492  | -0.70160413 | 3.07950997  | 6 | 1.60341513  | 3.91269588  | 1.77391016  |
| 1 | 3.91091514  | -0.11430420 | 2.57621002  | 6 | 0.84481514  | 0.66879588  | 3.80690980  |
| 6 | 3.01021504  | -2.65380406 | 1.62001014  | 6 | -0.10308486 | -0.32020420 | 3.13320994  |
| 1 | 2.99501514  | -3.42420411 | 0.84051013  | 8 | 0.80431515  | 2.31609583  | 0.12221012  |
| 1 | 2.67591524  | -3.11650419 | 2.55671000  | 1 | -1.13298488 | -0.08450420 | 3.42900991  |
| 1 | 2.28141522  | -1.88560426 | 1.35911012  | 1 | 0.98671520  | 4.68419600  | 2.24550986  |
| 6 | 5.39781475  | 2.15439582  | -2.97319007 | 8 | 0.38481516  | 4.49549627  | -0.15948988 |
| 1 | 6.41311502  | 2.32379580  | -2.60009003 | 8 | -2.08688474 | 3.72709584  | 0.48281011  |
| 1 | 5.45631504  | 1.49479580  | -3.84529018 | 8 | -2.71188474 | 3.55959582  | -1.68668985 |
| 1 | 5.01271486  | 3.11859584  | -3.32459021 | 6 | -0.48188484 | 4.20419598  | -1.27398992 |
| 6 | 4.39211512  | 2.69089580  | -0.78698987 | 6 | -0.54028487 | 5.45089626  | -2.14069009 |
| 1 | 3.77551508  | 2.36689591  | 0.05171011  | 1 | -0.08278485 | 3.35499597  | -1.83428991 |
| 1 | 5.39461470  | 2.90799594  | -0.40218988 | 6 | -1.84528482 | 3.80409575  | -0.70098984 |
| 1 | 3.98221517  | 3.62239575  | -1.19918990 | 6 | -4.03398514 | 3.14869595  | -1.26698983 |
| 6 | 3.08941507  | 1.40779579  | -2.54649019 | 1 | -3.98518491 | 2.18859577  | -0.75278986 |
| 1 | 2.33831525  | 1.03289580  | -1.85108984 | 1 | -4.46708488 | 3.90259576  | -0.60758984 |
| 1 | 2.72081518  | 2.35399580  | -2.96309018 | 1 | -4.61158514 | 3.06039596  | -2.18469000 |
| 1 | 3.16661525  | 0.68859583  | -3.36889005 | 1 | -1.19268489 | 5.27059603  | -2.99629021 |
| 6 | -4.34318495 | -0.93260413 | -0.01708989 | 1 | 0.45981514  | 5.69649601  | -2.50539017 |
| 6 | -4.96328497 | -1.14880431 | -1.29148984 | 1 | -0.92618483 | 6.30189610  | -1.57428992 |
| 6 | -6.35338497 | -1.03240430 | -1.38988984 | 1 | 0.11641515  | -1.33050430 | 3.50940990  |
| 1 | -6.84078503 | -1.18980432 | -2.34599018 | 1 | 2.52691507  | 4.41169596  | 1.45411015  |
| 6 | -7.15008497 | -0.72370416 | -0.29358989 | 6 | 1.90201521  | 2.75549579  | 2.72110987  |

|   |             |             |             |   |             |            |            |
|---|-------------|-------------|-------------|---|-------------|------------|------------|
| 6 | -6.54588509 | -0.53270411 | 0.94341016  | 1 | 0.69931513  | 0.58649588 | 4.89081001 |
| 1 | -7.18128490 | -0.30160421 | 1.79161012  | 6 | 0.64061517  | 2.12139583 | 3.32980990 |
| 6 | -5.16208506 | -0.62970412 | 1.11921012  | 1 | 1.87651515  | 0.34759581 | 3.62110996 |
| 6 | -4.14588499 | -1.51920426 | -2.54269004 | 1 | 2.49911523  | 2.00699592 | 2.18570995 |
| 6 | -4.55978489 | -0.40340421 | 2.51770997  | 1 | 2.56141520  | 3.11859584 | 3.51721001 |
| 6 | -3.63508487 | 0.82869583  | 2.49880981  | 1 | -0.16688487 | 2.13219595 | 2.59070992 |
| 1 | -4.19788504 | 1.72339571  | 2.21270990  | 1 | 0.29131514  | 2.75189590 | 4.15491009 |

## I-5\_LC

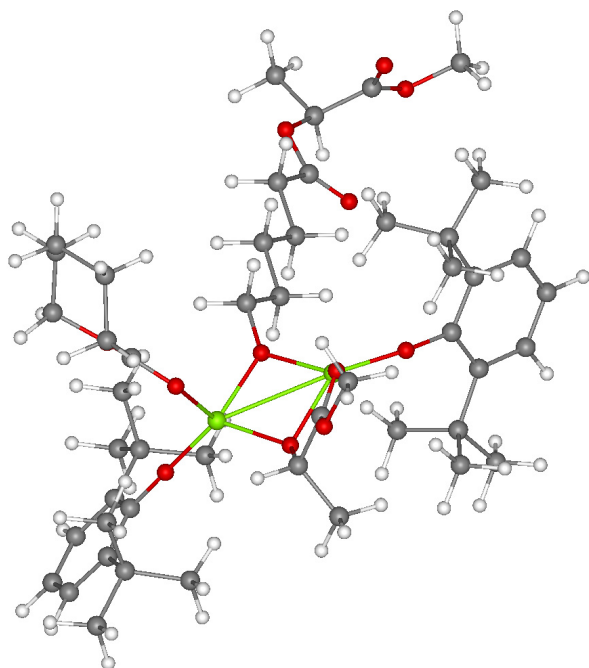

|                                              |                             |
|----------------------------------------------|-----------------------------|
| Zero-point vibrational energy                | 3116563.3 (Joules/Mol)      |
|                                              | 744.87651 (Kcal/Mol)        |
| Zero-point correction=                       | 1.187036 (Hartree/Particle) |
| Thermal correction to Energy=                | 1.260692                    |
| Thermal correction to Enthalpy=              | 1.261636                    |
| Thermal correction to Gibbs Free Energy=     | 1.064951                    |
| Sum of electronic and zero-point Energies=   | -3176.019960                |
| Sum of electronic and thermal Energies=      | -3175.946304                |
| Sum of electronic and thermal Enthalpies=    | -3175.945360                |
| Sum of electronic and thermal Free Energies= | -3176.142045                |

| cartesian |             |             |             |   |            |            |             |
|-----------|-------------|-------------|-------------|---|------------|------------|-------------|
| 12        | -2.52937508 | -0.24490061 | -0.04085302 | 1 | 1.82562494 | 3.15809917 | 3.27634716  |
| 12        | -0.80797499 | 2.15919924  | 0.00774698  | 6 | 1.73722494 | 3.28939915 | -4.74675322 |
| 8         | -3.37567520 | -1.65160060 | -0.92995298 | 1 | 1.95642495 | 4.32989931 | -5.00905323 |
| 8         | 0.62042499  | 3.24799919  | -0.45665303 | 1 | 2.64762497 | 2.69799924 | -4.88975334 |

|   |             |             |             |   |             |             |             |
|---|-------------|-------------|-------------|---|-------------|-------------|-------------|
| 8 | -2.63727498 | 1.64199936  | -0.68085301 | 1 | 0.99492496  | 2.92039919  | -5.46345329 |
| 8 | -2.06747508 | 3.45979929  | 1.12854695  | 6 | 0.89302498  | 1.65689933  | -3.10735297 |
| 8 | -4.15217495 | 4.28569937  | 1.15714693  | 1 | 0.50392497  | 1.44209933  | -2.11055303 |
| 6 | -3.66387510 | 2.55039930  | -0.44015303 | 1 | 0.16772497  | 1.28729939  | -3.84185290 |
| 6 | -4.02267504 | 3.37209916  | -1.68415308 | 1 | 1.81552494  | 1.07769942  | -3.22085285 |
| 1 | -4.57757521 | 2.04719925  | -0.08645302 | 6 | -0.13797504 | 3.97049928  | -3.29725289 |
| 6 | -3.22117519 | 3.47159934  | 0.69034702  | 1 | 0.06032497  | 5.01629925  | -3.55735302 |
| 6 | -3.74297500 | 5.20639944  | 2.19174719  | 1 | -0.85327500 | 3.56939936  | -4.02575302 |
| 1 | -4.63347530 | 5.78549957  | 2.42844701  | 1 | -0.60087502 | 3.95869923  | -2.30945301 |
| 1 | -2.94547510 | 5.85359955  | 1.82454693  | 1 | -5.45527506 | -5.74300051 | -3.46665287 |
| 6 | -3.89487505 | -2.67650080 | -1.59855306 | 1 | 5.28592491  | 5.02989960  | -2.03175282 |
| 6 | -5.29097509 | -2.69260073 | -1.92325306 | 1 | -3.39367509 | 4.65699959  | 3.06734705  |
| 6 | -5.81307507 | -3.80700064 | -2.58675289 | 1 | -4.84107494 | 4.06879950  | -1.48295307 |
| 1 | -6.86827517 | -3.84020066 | -2.83605289 | 1 | -4.32917500 | 2.68169928  | -2.47225285 |
| 6 | -5.02097511 | -4.88940048 | -2.95185304 | 1 | -3.15327501 | 3.93139935  | -2.04035282 |
| 6 | -3.66137505 | -4.85380030 | -2.66545296 | 8 | -0.70757502 | 0.26269940  | 0.52024704  |
| 1 | -3.05247498 | -5.69630051 | -2.97565293 | 6 | 0.32682496  | -0.44980061 | 1.17764699  |
| 6 | -3.06797504 | -3.77370071 | -2.00515294 | 6 | 1.59482491  | -0.56760055 | 0.33914694  |
| 6 | -6.21997499 | -1.51380062 | -1.57815301 | 1 | 0.56812495  | 0.04849939  | 2.13004708  |
| 6 | -1.54967511 | -3.77950072 | -1.75295305 | 6 | 2.69942498  | -1.34370065 | 1.05814695  |
| 6 | -7.66407490 | -1.73560059 | -2.06165290 | 1 | 1.95272493  | 0.43689939  | 0.08314697  |
| 1 | -7.72327518 | -1.85900068 | -3.14805293 | 1 | 1.34412491  | -1.06060064 | -0.60735297 |
| 1 | -8.13277531 | -2.60590076 | -1.58985305 | 8 | -3.51767516 | -0.04710060 | 1.81164694  |
| 1 | -8.26857471 | -0.85930055 | -1.80025303 | 6 | -3.61217499 | -0.85270059 | 2.73864698  |
| 6 | -6.29477501 | -1.31880069 | -0.05165302 | 6 | -4.44497490 | -0.55500060 | 3.95574713  |
| 1 | -6.93797493 | -0.46490061 | 0.19904697  | 8 | -2.93457508 | -1.98580062 | 2.63594699  |
| 1 | -6.71827507 | -2.21100068 | 0.42434695  | 6 | -3.63307500 | -0.47680059 | 5.26164675  |
| 1 | -5.30537510 | -1.14580059 | 0.36994699  | 1 | -5.23107529 | -1.31500065 | 4.04534674  |
| 6 | -5.72087526 | -0.22750062 | -2.26605296 | 1 | -4.93747520 | 0.39639941  | 3.75184703  |
| 1 | -5.75837517 | -0.34030059 | -3.35505295 | 6 | -3.03537512 | -3.05600071 | 3.61124706  |
| 1 | -6.35867500 | 0.62439942  | -1.99575305 | 1 | -2.73557520 | 0.13099940  | 5.09694672  |
| 1 | -4.69017506 | 0.00449940  | -1.99475300 | 1 | -4.24097490 | 0.06849940  | 5.99074697  |
| 6 | -0.86087501 | -5.03780031 | -2.31105304 | 1 | -4.08617496 | -3.34760070 | 3.70934701  |
| 1 | -1.23247504 | -5.95730066 | -1.84615302 | 1 | -2.50537515 | -3.87270069 | 3.12184715  |
| 1 | -0.97907501 | -5.12770033 | -3.39585304 | 6 | -3.25707507 | -1.83370066 | 5.85574675  |
| 1 | 0.21402496  | -4.98040056 | -2.10515285 | 1 | -4.17687511 | -2.37510085 | 6.11384678  |
| 6 | -1.25637507 | -3.76150084 | -0.23985302 | 1 | -2.72487497 | -1.67080069 | 6.79914665  |
| 1 | -1.74737513 | -2.92390084 | 0.25794700  | 6 | -2.40047503 | -2.71690083 | 4.94904661  |
| 1 | -1.62347507 | -4.68440056 | 0.22464697  | 1 | -1.42177510 | -2.25930071 | 4.76354694  |
| 1 | -0.17677501 | -3.69750071 | -0.05535302 | 1 | -2.20437503 | -3.66700077 | 5.45934677  |
| 6 | -0.89087504 | -2.57860065 | -2.46045303 | 1 | -0.02797503 | -1.45840061 | 1.43574691  |

---

|   |             |             |             |   |             |             |             |
|---|-------------|-------------|-------------|---|-------------|-------------|-------------|
| 1 | -1.30307508 | -1.62500060 | -2.12795281 | 6 | 3.96772480  | -1.50540066 | 0.21864697  |
| 1 | 0.19062497  | -2.56890082 | -2.28055286 | 1 | 2.32212496  | -2.33710074 | 1.34064698  |
| 1 | -1.05017507 | -2.64340067 | -3.54205298 | 1 | 2.94992495  | -0.83450055 | 1.99914706  |
| 6 | 1.79432487  | 3.72119927  | -0.86455297 | 6 | 5.04772472  | -2.29240084 | 0.95404702  |
| 6 | 2.14622498  | 3.68769932  | -2.25125289 | 1 | 4.36132479  | -0.52290058 | -0.06015302 |
| 6 | 3.40502501  | 4.16329956  | -2.63105297 | 1 | 3.72712493  | -2.01190066 | -0.72285300 |
| 1 | 3.69842482  | 4.13829947  | -3.67515302 | 6 | 6.31742477  | -2.46410084 | 0.15974697  |
| 6 | 4.31032515  | 4.67519951  | -1.70835304 | 1 | 4.69302511  | -3.28720069 | 1.24764693  |
| 6 | 3.94582486  | 4.73939943  | -0.36805305 | 1 | 5.33022499  | -1.79310060 | 1.88954699  |
| 1 | 4.65742493  | 5.15909958  | 0.33504698  | 8 | 7.16562510  | -3.32420087 | 0.78634703  |
| 6 | 2.70322490  | 4.28649950  | 0.08554698  | 8 | 6.58372498  | -1.92500067 | -0.89245301 |
| 6 | 1.17272496  | 3.15749931  | -3.32075286 | 6 | 8.44272518  | -3.49160075 | 0.16804697  |
| 6 | 2.33252501  | 4.42939949  | 1.57424700  | 6 | 9.27692509  | -2.22500086 | 0.35104695  |
| 6 | 3.44442487  | 5.10809946  | 2.39404702  | 1 | 8.31452465  | -3.66070080 | -0.90425301 |
| 1 | 3.66642499  | 6.11769962  | 2.03284717  | 6 | 9.11262512  | -4.68710041 | 0.83134699  |
| 1 | 3.11812496  | 5.19959927  | 3.43644714  | 8 | 10.29522514 | -2.21340084 | -0.52805299 |
| 1 | 4.37492514  | 4.53029966  | 2.39444709  | 8 | 9.08222485  | -1.37430060 | 1.18894696  |
| 6 | 1.07432485  | 5.30949926  | 1.72124696  | 6 | 11.17032528 | -1.07680058 | -0.43575302 |
| 1 | 1.26952493  | 6.31499958  | 1.33194697  | 1 | 11.92112446 | -1.22330058 | -1.21095300 |
| 1 | 0.22762498  | 4.89299965  | 1.17514694  | 1 | 11.63882446 | -1.03370059 | 0.54984701  |
| 1 | 0.79592496  | 5.40589952  | 2.77894711  | 1 | 10.61172485 | -0.15560061 | -0.61115301 |
| 6 | 2.10012484  | 3.04919934  | 2.21924710  | 1 | 10.09252453 | -4.86450052 | 0.38254699  |
| 1 | 1.30472493  | 2.49859929  | 1.71444690  | 1 | 8.49662495  | -5.57880068 | 0.69094700  |
| 1 | 3.01042485  | 2.44219923  | 2.16674709  | 1 | 9.23722458  | -4.51350069 | 1.90314698  |

---

### S1.3. CC sequence, mononuclear mechanism

#### I-1\_CC

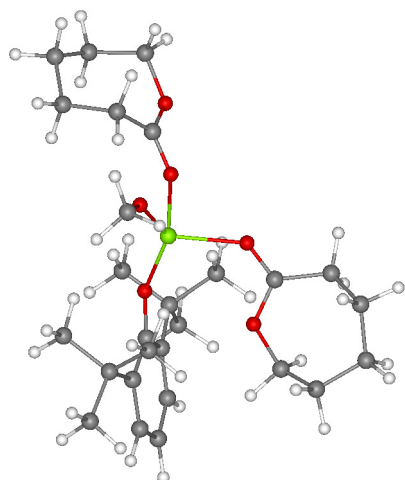

|                                              |                             |
|----------------------------------------------|-----------------------------|
| Zero-point vibrational energy                | 1784683.0 (Joules/Mol)      |
|                                              | 426.54948 (Kcal/Mol)        |
| Zero-point correction=                       | 0.679750 (Hartree/Particle) |
| Thermal correction to Energy=                | 0.719103                    |
| Thermal correction to Enthalpy=              | 0.720047                    |
| Thermal correction to Gibbs Free Energy=     | 0.604580                    |
| Sum of electronic and zero-point Energies=   | -1705.797246                |
| Sum of electronic and thermal Energies=      | -1705.757893                |
| Sum of electronic and thermal Enthalpies=    | -1705.756949                |
| Sum of electronic and thermal Free Energies= | -1705.872416                |

| cartesian |             |             |             |   |             |            |             |  |  |  |  |
|-----------|-------------|-------------|-------------|---|-------------|------------|-------------|--|--|--|--|
| 8         | -1.63320374 | 0.75279218  | -2.54900122 | 1 | -0.22190370 | 0.54409218 | 1.85919869  |  |  |  |  |
| 6         | -1.40160370 | 0.82269216  | -3.91410136 | 8 | 0.18789630  | 2.31889224 | -0.29470125 |  |  |  |  |
| 1         | -1.03700376 | -0.13080782 | -4.33640146 | 6 | 1.31929624  | 2.47839212 | 0.17269874  |  |  |  |  |
| 1         | -0.65780371 | 1.59449220  | -4.18610144 | 8 | 2.16109633  | 1.46659219 | 0.10809873  |  |  |  |  |
| 12        | -0.80780369 | 0.56899220  | -0.88910127 | 6 | 1.73529625  | 3.79649210 | 0.77209872  |  |  |  |  |
| 8         | 0.13459630  | -0.89550781 | -0.14480126 | 6 | 3.46119618  | 1.46709216 | 0.74919873  |  |  |  |  |
| 6         | 1.22249627  | -1.51050782 | 0.28239873  | 6 | 2.92789626  | 4.46169233 | 0.06189874  |  |  |  |  |
| 6         | 2.20499635  | -1.99840784 | -0.64440125 | 6 | 4.46029615  | 2.38929224 | 0.07159874  |  |  |  |  |
| 6         | 3.39919639  | -2.52220774 | -0.13730127 | 1 | 3.76279640  | 0.42199215 | 0.67419875  |  |  |  |  |
| 1         | 4.16589642  | -2.87290788 | -0.82050127 | 1 | 2.92339635  | 5.52069235 | 0.34079874  |  |  |  |  |
| 6         | 3.64339638  | -2.62950778 | 1.22909880  | 1 | 2.76799631  | 4.43219233 | -1.02230132 |  |  |  |  |
| 6         | 2.64119625  | -2.25680780 | 2.12049866  | 1 | 1.96859622  | 3.64189219 | 1.83319879  |  |  |  |  |
| 1         | 2.82149625  | -2.40140772 | 3.18099880  | 1 | 0.85299629  | 4.43609238 | 0.72429872  |  |  |  |  |
| 6         | 1.42389631  | -1.72120786 | 1.68899870  | 6 | 4.29299641  | 3.86909223 | 0.41459873  |  |  |  |  |

|   |             |             |             |   |             |             |             |
|---|-------------|-------------|-------------|---|-------------|-------------|-------------|
| 6 | 1.96959639  | -1.98390794 | -2.16870117 | 1 | 3.33159637  | 1.70519221  | 1.81019878  |
| 6 | 0.32569629  | -1.39340782 | 2.71959877  | 1 | 4.40389633  | 2.22809219  | -1.01120126 |
| 6 | 2.00169635  | -0.54830784 | -2.72600126 | 1 | 5.45969629  | 2.06109214  | 0.38019875  |
| 1 | 1.22779632  | 0.08459218  | -2.29080129 | 1 | 4.47169638  | 4.00689220  | 1.48959875  |
| 1 | 1.84669626  | -0.55240786 | -3.81130123 | 1 | 5.07019615  | 4.44599199  | -0.09900127 |
| 1 | 2.97029638  | -0.07790782 | -2.52240133 | 8 | -2.44980359 | 0.88429219  | 0.33769873  |
| 6 | 0.62799633  | -2.66250777 | -2.51400137 | 6 | -3.67240381 | 0.92199218  | 0.20779873  |
| 1 | -0.21590370 | -2.15730786 | -2.04460120 | 6 | -4.36730385 | 0.67469215  | -1.10120130 |
| 1 | 0.63289630  | -3.70440793 | -2.17460132 | 8 | -4.36890364 | 1.18019211  | 1.31499875  |
| 1 | 0.47189629  | -2.66190791 | -3.59970117 | 6 | -5.16870356 | -0.64060783 | -1.11420131 |
| 6 | 3.05809641  | -2.76440787 | -2.93000126 | 1 | -5.03230381 | 1.51969218  | -1.32210124 |
| 1 | 3.12749624  | -3.80500793 | -2.59570122 | 1 | -3.56980371 | 0.66189218  | -1.85710120 |
| 1 | 4.04889631  | -2.30600786 | -2.83710122 | 6 | -5.81350374 | 1.21099222  | 1.31009877  |
| 1 | 2.80979633  | -2.77670789 | -3.99730134 | 1 | -4.55880356 | -1.44370782 | -0.68430126 |
| 6 | 0.69249630  | -1.87250781 | 4.13579845  | 1 | -5.32900381 | -0.91320783 | -2.16200137 |
| 1 | 1.56999624  | -1.35650778 | 4.54119873  | 1 | -6.16040373 | 1.96529222  | 0.59519875  |
| 1 | 0.88229632  | -2.95060778 | 4.16879845  | 1 | -6.05050373 | 1.56709218  | 2.31359863  |
| 1 | -0.14370370 | -1.66490781 | 4.81319857  | 6 | -6.52230358 | -0.56210786 | -0.40940127 |
| 6 | -0.98840368 | -2.10860777 | 2.34219885  | 1 | -7.16130352 | 0.15109217  | -0.94790125 |
| 1 | -1.32730365 | -1.81810784 | 1.34779871  | 1 | -7.02310371 | -1.53420782 | -0.48150125 |
| 1 | -1.77440369 | -1.86410785 | 3.06779885  | 6 | -6.45480347 | -0.14640781 | 1.06049871  |
| 1 | -0.84570372 | -3.19510794 | 2.35229874  | 1 | -5.91880369 | -0.89490783 | 1.65619874  |
| 6 | 0.09229630  | 0.12619218  | 2.81439877  | 1 | -7.47280359 | -0.10070782 | 1.46559870  |
| 1 | 1.01079631  | 0.63259214  | 3.13669872  | 1 | -2.32560372 | 1.07689226  | -4.46610165 |
| 1 | -0.69010371 | 0.35279217  | 3.54929876  | 1 | 4.58229637  | -3.04120779 | 1.59229875  |

## TS-12\_CC

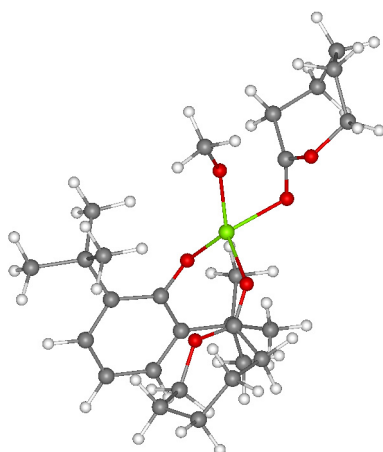

Zero-point vibrational energy

1783379.8 (Joules/Mol)

426.23801 (Kcal/Mol)

Zero-point correction=

0.679254 (Hartree/Particle)



|                                              |              |
|----------------------------------------------|--------------|
| Thermal correction to Energy=                | 0.717627     |
| Thermal correction to Enthalpy=              | 0.718571     |
| Thermal correction to Gibbs Free Energy=     | 0.606288     |
| Sum of electronic and zero-point Energies=   | -1705.775815 |
| Sum of electronic and thermal Energies=      | -1705.737442 |
| Sum of electronic and thermal Enthalpies=    | -1705.736497 |
| Sum of electronic and thermal Free Energies= | -1705.848780 |

| cartesian |             |             |             |    |             |             |             |
|-----------|-------------|-------------|-------------|----|-------------|-------------|-------------|
| 8         | 0.41141027  | -1.15696788 | -0.07369613 | 1  | -2.06328964 | 1.48363209  | -2.98629618 |
| 6         | 1.69001031  | -1.49026787 | -0.03679613 | 8  | -2.59148979 | -0.21696796 | 1.08880389  |
| 6         | 2.30881023  | -1.84046793 | 1.20880389  | 12 | -0.98018974 | 0.10603204  | -0.06809613 |
| 6         | 3.68981028  | -2.06046796 | 1.22960389  | 1  | 5.53981018  | -2.16926789 | 0.12200387  |
| 1         | 4.18301010  | -2.30446792 | 2.16520381  | 6  | -3.57408977 | -0.00136795 | 0.32490388  |
| 6         | 4.46741009  | -1.99406791 | 0.07620387  | 6  | -4.36918974 | -1.17096794 | -0.22409612 |
| 6         | 3.84031034  | -1.76226795 | -1.14559615 | 8  | -4.13858986 | 1.23363209  | 0.39440387  |
| 1         | 4.44991016  | -1.77586794 | -2.04339623 | 6  | -5.60708952 | -1.49636793 | 0.62680387  |
| 6         | 2.46371031  | -1.53326786 | -1.24389613 | 1  | -4.65528965 | -0.97646797 | -1.25979614 |
| 6         | 1.48361027  | -2.01206779 | 2.50000381  | 1  | -3.67498970 | -2.01206779 | -0.23259613 |
| 6         | 1.80941033  | -1.37266791 | -2.63079619 | 6  | -5.53198957 | 1.45693207  | 0.67950386  |
| 6         | 0.91351026  | -0.66596794 | 2.98640370  | 1  | -5.38068962 | -1.31876791 | 1.68450391  |
| 1         | 0.25141028  | -0.21386795 | 2.24790382  | 1  | -5.82098961 | -2.56746793 | 0.55030388  |
| 1         | 0.33271030  | -0.80276799 | 3.90650368  | 1  | -5.63078976 | 2.53813219  | 0.56390387  |
| 1         | 1.72361028  | 0.04093205  | 3.20330381  | 1  | -5.70948982 | 1.22123206  | 1.73700392  |
| 6         | 0.33601028  | -3.01746798 | 2.26750374  | 6  | -6.84738970 | -0.70086795 | 0.19940388  |
| 1         | -0.32858971 | -2.69306779 | 1.46680391  | 1  | -7.33648968 | -1.20586789 | -0.64189613 |
| 1         | 0.74171031  | -3.99906802 | 1.99850392  | 1  | -7.57548952 | -0.70156795 | 1.01930380  |
| 1         | -0.25518972 | -3.13586783 | 3.18390369  | 6  | -6.53958988 | 0.74493206  | -0.21359614 |
| 6         | 2.32831025  | -2.57186794 | 3.65860367  | 1  | -7.46748972 | 1.32913208  | -0.19399613 |
| 1         | 2.78131032  | -3.53636789 | 3.40650368  | 1  | -6.17908955 | 0.79373205  | -1.24669611 |
| 1         | 3.12621021  | -1.88756788 | 3.96840382  | 8  | -0.20808974 | 1.96393204  | 0.47260389  |
| 1         | 1.68311024  | -2.72986794 | 4.53010368  | 6  | 0.94761026  | 2.36193204  | 0.65290385  |
| 6         | 2.79891038  | -1.65776789 | -3.77539635 | 8  | 1.93371034  | 1.60823214  | 0.21490386  |
| 1         | 3.62341022  | -0.93686795 | -3.81029630 | 6  | 1.21631026  | 3.68193221  | 1.32550383  |
| 1         | 3.22491026  | -2.66426802 | -3.70729613 | 6  | 1.97771025  | 4.68893194  | 0.44520387  |
| 1         | 2.27051020  | -1.58856785 | -4.73289633 | 1  | 1.77321029  | 3.49763203  | 2.25290370  |
| 6         | 0.65211028  | -2.38096786 | -2.79249620 | 1  | 0.23911029  | 4.07623196  | 1.60690391  |
| 1         | -0.11508973 | -2.24266791 | -2.03059626 | 6  | 3.33221030  | 1.87703204  | 0.49130389  |
| 1         | 0.18671027  | -2.26826787 | -3.77949619 | 1  | 1.52491033  | 4.71423197  | -0.55309612 |
| 1         | 1.02981031  | -3.40636802 | -2.71309614 | 1  | 1.81881022  | 5.68303204  | 0.87590390  |
| 6         | 1.29531026  | 0.06283205  | -2.84889627 | 1  | 3.46591020  | 1.96803212  | 1.57440388  |

|   |             |            |             |   |            |            |             |
|---|-------------|------------|-------------|---|------------|------------|-------------|
| 1 | 2.12041020  | 0.78233200 | -2.80179620 | 1 | 3.81631017 | 0.95493203 | 0.16850388  |
| 1 | 0.81961030  | 0.15553205 | -3.83279634 | 6 | 3.48191023 | 4.43523169 | 0.34190387  |
| 1 | 0.55941027  | 0.35193205 | -2.09759617 | 1 | 3.92411017 | 4.51903200 | 1.34390390  |
| 8 | -2.42238975 | 0.30173206 | -1.32939613 | 1 | 3.93341017 | 5.23423195 | -0.25669613 |
| 6 | -2.89018965 | 1.03173208 | -2.41749620 | 6 | 3.86871028 | 3.08373213 | -0.25889611 |
| 1 | -3.55088973 | 1.85293210 | -2.09219623 | 1 | 3.54871035 | 3.01313210 | -1.30499613 |
| 1 | -3.45608974 | 0.39653206 | -3.11979628 | 1 | 4.96131039 | 2.99503207 | -0.26549613 |

## I-2\_CC

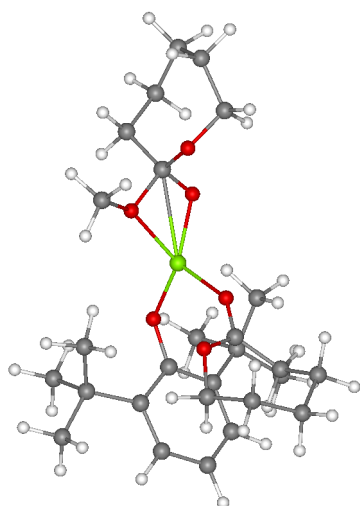

|                                              |                             |
|----------------------------------------------|-----------------------------|
| Zero-point vibrational energy                | 1790760.0 (Joules/Mol)      |
|                                              | 428.00192 (Kcal/Mol)        |
| Zero-point correction=                       | 0.682064 (Hartree/Particle) |
| Thermal correction to Energy=                | 0.719931                    |
| Thermal correction to Enthalpy=              | 0.720875                    |
| Thermal correction to Gibbs Free Energy=     | 0.610171                    |
| Sum of electronic and zero-point Energies=   | -1705.786682                |
| Sum of electronic and thermal Energies=      | -1705.748816                |
| Sum of electronic and thermal Enthalpies=    | -1705.747872                |
| Sum of electronic and thermal Free Energies= | -1705.858576                |

| cartesian |            |             |             |    |             |             |             |
|-----------|------------|-------------|-------------|----|-------------|-------------|-------------|
| 8         | 0.25038970 | -1.54128444 | -0.52589613 | 1  | -3.08721042 | 2.34221578  | -2.03589606 |
| 6         | 1.55038965 | -1.49038446 | -0.25979611 | 8  | -3.96351027 | 1.47891557  | 0.02840389  |
| 6         | 2.04138970 | -1.90178442 | 1.02160394  | 6  | -3.55441022 | 0.16831554  | -0.34559610 |
| 6         | 3.38618970 | -1.66128445 | 1.32230389  | 8  | -2.88151026 | -0.48128444 | 0.59690386  |
| 1         | 3.77998972 | -1.92938447 | 2.29760385  | 6  | -4.69181013 | -0.64958447 | -0.97319609 |
| 6         | 4.25868988 | -1.09088445 | 0.39690387  | 12 | -1.07961035 | -0.25568444 | -0.06869611 |
| 6         | 3.80318975 | -0.83638448 | -0.89599609 | 1  | -5.21001053 | -0.06388445 | -1.74139607 |
| 1         | 4.51898956 | -0.47988445 | -1.63059604 | 1  | 5.29918957  | -0.91248447 | 0.65930390  |
| 6         | 2.47238970 | -1.05808449 | -1.26819611 | 6  | -4.86801052 | 1.53341556  | 1.13160396  |

|   |             |             |             |   |             |             |             |
|---|-------------|-------------|-------------|---|-------------|-------------|-------------|
| 6 | 1.14478970  | -2.68048429 | 2.00710392  | 1 | -4.53901052 | 0.83841556  | 1.91380394  |
| 6 | 2.04238963  | -0.95208442 | -2.74569607 | 6 | -6.31771040 | 1.29591560  | 0.71040386  |
| 6 | -0.09141032 | -1.88158441 | 2.47390389  | 1 | -4.76451015 | 2.54961562  | 1.52370393  |
| 1 | -0.89181030 | -1.89168441 | 1.73110390  | 1 | -6.97701025 | 1.77911556  | 1.44270396  |
| 1 | -0.52021033 | -2.33808422 | 3.37380385  | 6 | -6.75461054 | -0.17248444 | 0.54540390  |
| 1 | 0.15808968  | -0.84528446 | 2.72550392  | 1 | -6.46301031 | 1.84231555  | -0.22909610 |
| 6 | 0.66888970  | -3.97908449 | 1.32170391  | 1 | -4.21801043 | -1.50208449 | -1.46999609 |
| 1 | 0.11828968  | -3.75778437 | 0.40500388  | 6 | -5.67481041 | -1.16488445 | 0.08390389  |
| 1 | 1.52198970  | -4.61748409 | 1.06830394  | 1 | -5.08111048 | -1.50418448 | 0.93860388  |
| 1 | 0.00998968  | -4.54408455 | 1.99260390  | 1 | -6.17911053 | -2.05678439 | -0.30569613 |
| 6 | 1.91628969  | -3.08808422 | 3.27440405  | 1 | -7.59651041 | -0.19698445 | -0.15749609 |
| 1 | 2.79738975  | -3.69548440 | 3.04440403  | 1 | -7.15621042 | -0.53948444 | 1.49780393  |
| 1 | 2.23938966  | -2.22208428 | 3.86430383  | 8 | 0.05928968  | 1.24481559  | 0.70280391  |
| 1 | 1.26478970  | -3.69228435 | 3.91470385  | 6 | 1.14918971  | 1.81891561  | 0.66840386  |
| 6 | 3.21938968  | -0.56968445 | -3.65929604 | 8 | 1.43688965  | 2.51341558  | -0.42329612 |
| 1 | 3.61468959  | 0.42821556  | -3.43489599 | 6 | 2.09968972  | 1.78121555  | 1.83130395  |
| 1 | 4.04348946  | -1.28758442 | -3.59569597 | 6 | 2.75248981  | 3.08281565  | -0.64669609 |
| 1 | 2.87978959  | -0.55708444 | -4.70069599 | 6 | 2.42978978  | 3.15791559  | 2.43530393  |
| 6 | 1.53138971  | -2.33438444 | -3.20529604 | 6 | 3.04598975  | 4.29811573  | 0.21720390  |
| 1 | 0.68218970  | -2.65698433 | -2.59939599 | 1 | 2.71668959  | 3.36051559  | -1.70069611 |
| 1 | 1.21378970  | -2.29388428 | -4.25479603 | 1 | 2.81878972  | 2.98181558  | 3.44340396  |
| 1 | 2.32318974  | -3.08648443 | -3.12059617 | 1 | 1.50578964  | 3.73481560  | 2.56270385  |
| 6 | 0.93418968  | 0.09231555  | -2.98299599 | 1 | 3.01308966  | 1.26161551  | 1.51130390  |
| 1 | 1.19908965  | 1.06801558  | -2.56409597 | 1 | 1.62688971  | 1.14341557  | 2.57770395  |
| 1 | 0.76808971  | 0.22291555  | -4.05949593 | 6 | 3.45868969  | 3.96971560  | 1.65070391  |
| 1 | -0.01091032 | -0.23308444 | -2.54619598 | 1 | 3.50038958  | 2.29251575  | -0.52989614 |
| 8 | -2.51511025 | 0.44661555  | -1.40109611 | 1 | 2.16978979  | 4.95741558  | 0.20140390  |
| 6 | -2.79721022 | 1.37281561  | -2.44719601 | 1 | 3.85688972  | 4.85051584  | -0.27229610 |
| 1 | -3.59261036 | 0.99051553  | -3.09539604 | 1 | 4.40668964  | 3.41641569  | 1.63060391  |
| 1 | -1.88301027 | 1.47491550  | -3.03479600 | 1 | 3.66058969  | 4.90341568  | 2.18740392  |

### TS-23\_CC

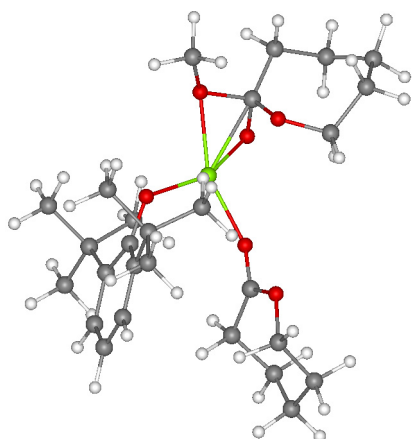

|                                              |                             |
|----------------------------------------------|-----------------------------|
| Zero-point vibrational energy                | 1788747.1 (Joules/Mol)      |
|                                              | 427.52081 (Kcal/Mol)        |
| Zero-point correction=                       | 0.681298 (Hartree/Particle) |
| Thermal correction to Energy=                | 0.718427                    |
| Thermal correction to Enthalpy=              | 0.719371                    |
| Thermal correction to Gibbs Free Energy=     | 0.611018                    |
| Sum of electronic and zero-point Energies=   | -1705.780691                |
| Sum of electronic and thermal Energies=      | -1705.743562                |
| Sum of electronic and thermal Enthalpies=    | -1705.742618                |
| Sum of electronic and thermal Free Energies= | -1705.850971                |

| cartesian |             |             |             |    |             |             |             |
|-----------|-------------|-------------|-------------|----|-------------|-------------|-------------|
| 8         | 0.24478835  | -1.67412949 | -0.32297692 | 1  | -3.45271158 | -1.51352954 | -2.20877695 |
| 6         | 1.54718840  | -1.43452954 | -0.26237693 | 8  | -3.17851162 | 0.34757045  | -0.68777692 |
| 6         | 2.27778840  | -1.73972952 | 0.93122309  | 6  | -3.53521156 | -0.62462956 | 0.37402308  |
| 6         | 3.61268830  | -1.33162951 | 1.01452315  | 8  | -2.83101153 | -0.37542954 | 1.45772302  |
| 1         | 4.18368816  | -1.52022958 | 1.91822302  | 6  | -5.04001188 | -0.79232955 | 0.56262308  |
| 6         | 4.25228834  | -0.68542951 | -0.04217692 | 12 | -1.18441164 | -0.62062955 | 0.38092306  |
| 6         | 3.56978846  | -0.51442951 | -1.24617696 | 1  | -5.53341198 | -0.97352952 | -0.39847693 |
| 1         | 4.11058807  | -0.08632953 | -2.08467698 | 1  | 5.29098797  | -0.37612954 | 0.05032308  |
| 6         | 2.23468852  | -0.90412956 | -1.40257692 | 6  | -3.56971169 | 1.70197046  | -0.43477693 |
| 6         | 1.64438844  | -2.59272933 | 2.04992318  | 1  | -3.29821157 | 1.97757041  | 0.59212309  |
| 6         | 1.56468844  | -0.87412953 | -2.79167700 | 6  | -5.04951191 | 1.94217050  | -0.72647691 |
| 6         | 0.33978835  | -1.99292958 | 2.62472296  | 1  | -2.95571160 | 2.29797053  | -1.11557698 |
| 1         | -0.52971166 | -2.25762939 | 2.01732302  | 1  | -5.18411160 | 2.99567056  | -1.00187695 |
| 1         | 0.13608834  | -2.40432930 | 3.61992311  | 6  | -6.03201199 | 1.60237050  | 0.40952307  |
| 1         | 0.39358833  | -0.90442955 | 2.73692298  | 1  | -5.29131174 | 1.36547041  | -1.62707698 |
| 6         | 1.33308840  | -3.99182940 | 1.47692311  | 1  | -5.15571165 | -1.69632959 | 1.16902304  |
| 1         | 0.65868837  | -3.91782951 | 0.62072307  | 6  | -5.66531181 | 0.39937046  | 1.29302311  |
| 1         | 2.25298834  | -4.48992920 | 1.15282309  | 1  | -4.96581173 | 0.70217049  | 2.07842302  |
| 1         | 0.85648835  | -4.62072945 | 2.23932314  | 1  | -6.57301188 | 0.06577048  | 1.80862308  |
| 6         | 2.60698843  | -2.78162932 | 3.23542309  | 1  | -7.02021170 | 1.43997049  | -0.03827692 |
| 1         | 3.54128838  | -3.26732945 | 2.93682313  | 1  | -6.14401197 | 2.47607064  | 1.06302309  |
| 1         | 2.85348845  | -1.83252954 | 3.72592306  | 8  | -0.11161165 | 1.08457041  | 0.78702307  |
| 1         | 2.13558841  | -3.42522931 | 3.98582315  | 6  | 0.87358832  | 1.80287051  | 0.62592310  |
| 6         | 2.52298832  | -0.35772952 | -3.87887692 | 8  | 0.89628834  | 2.57047057  | -0.45817691 |
| 1         | 2.82088852  | 0.68407047  | -3.71087694 | 6  | 1.98798847  | 1.86657047  | 1.63232303  |
| 1         | 3.42988849  | -0.96622956 | -3.95687699 | 6  | 2.08128834  | 3.30927062  | -0.84657693 |
| 1         | 2.02058840  | -0.39762953 | -4.85157681 | 6  | 2.22078848  | 3.25917053  | 2.24472308  |
| 6         | 1.17138839  | -2.31702948 | -3.17457700 | 6  | 2.34998846  | 4.53097057  | 0.01702308  |

|   |             |             |             |   |            |            |             |
|---|-------------|-------------|-------------|---|------------|------------|-------------|
| 1 | 0.48208833  | -2.74002934 | -2.44107699 | 1 | 1.85418844 | 3.60627055 | -1.87127697 |
| 1 | 0.68588835  | -2.33132935 | -4.15847683 | 1 | 2.77268839 | 3.11157060 | 3.17872310  |
| 1 | 2.05758834  | -2.95882940 | -3.22597694 | 1 | 1.25848842 | 3.70307064 | 2.52732301  |
| 6 | 0.31018835  | 0.01947048  | -2.84337687 | 1 | 2.90358829 | 1.48577046 | 1.16032302  |
| 1 | 0.51898837  | 1.03187048  | -2.48517704 | 1 | 1.72428846 | 1.15067041 | 2.41042304  |
| 1 | -0.05021165 | 0.09747048  | -3.87647700 | 6 | 3.00998831 | 4.22187042 | 1.35942304  |
| 1 | -0.50371164 | -0.39632952 | -2.24847698 | 1 | 2.93148851 | 2.62047052 | -0.87437695 |
| 8 | -2.91061163 | -1.82912958 | -0.21447693 | 1 | 1.40648842 | 5.07177067 | 0.15862308  |
| 6 | -3.37271166 | -2.31852937 | -1.47297692 | 1 | 3.00338840 | 5.19577074 | -0.56037694 |
| 1 | -4.34011173 | -2.81902933 | -1.35757697 | 1 | 4.00668812 | 3.79937053 | 1.17652309  |
| 1 | -2.63431168 | -3.04852939 | -1.80907691 | 1 | 3.16958833 | 5.15917063 | 1.90412307  |

### I-3\_CC

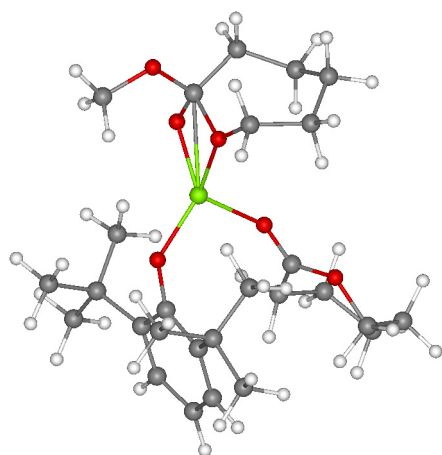

|                                              |                             |
|----------------------------------------------|-----------------------------|
| Zero-point vibrational energy                | 1789228.3 (Joules/Mol)      |
|                                              | 427.63583 (Kcal/Mol)        |
| Zero-point correction=                       | 0.681481 (Hartree/Particle) |
| Thermal correction to Energy=                | 0.719233                    |
| Thermal correction to Enthalpy=              | 0.720177                    |
| Thermal correction to Gibbs Free Energy=     | 0.610751                    |
| Sum of electronic and zero-point Energies=   | -1705.795191                |
| Sum of electronic and thermal Energies=      | -1705.757440                |
| Sum of electronic and thermal Enthalpies=    | -1705.756495                |
| Sum of electronic and thermal Free Energies= | -1705.865921                |

### cartesian

|    |             |             |             |   |             |             |            |
|----|-------------|-------------|-------------|---|-------------|-------------|------------|
| 12 | -1.32603967 | -0.55938852 | 0.35671797  | 1 | 0.27376026  | -3.02628875 | 3.33641791 |
| 8  | -4.71623993 | -1.63358855 | 0.46611795  | 1 | -0.46963978 | -2.26688862 | 1.95091796 |
| 6  | -4.11123991 | -2.89658856 | 0.21591796  | 8 | -2.79233980 | -0.95398855 | 1.56241798 |
| 1  | -3.42143965 | -2.85068870 | -0.63568205 | 6 | -3.83493972 | -0.60638857 | 0.82461792 |
| 1  | -4.92984009 | -3.57638860 | -0.02838204 | 6 | -4.70974016 | 0.52411151  | 1.37811792 |

---

|   |             |             |             |   |             |             |             |
|---|-------------|-------------|-------------|---|-------------|-------------|-------------|
| 1 | -3.57683969 | -3.26008868 | 1.09751797  | 8 | -3.13833976 | -0.13808854 | -0.49248204 |
| 8 | -0.00773977 | -1.66278851 | -0.46178207 | 6 | -4.15483999 | 1.94351149  | 1.23261797  |
| 6 | 1.30666029  | -1.47548854 | -0.49968204 | 1 | -5.70673990 | 0.46231148  | 0.92911792  |
| 6 | 1.90356016  | -0.80138850 | -1.61558211 | 1 | -4.82863998 | 0.27191147  | 2.43601799  |
| 6 | 3.25946021  | -0.46368855 | -1.53578210 | 6 | -3.89053965 | 0.54091144  | -1.49598205 |
| 1 | 3.73326039  | 0.07141146  | -2.35298204 | 1 | -3.07163978 | 1.94511151  | 1.40541792  |
| 6 | 4.04646015  | -0.82498848 | -0.44348204 | 1 | -4.58614016 | 2.55911136  | 2.03121805  |
| 6 | 3.48826027  | -1.61348855 | 0.56121790  | 1 | -4.92884016 | 0.19221146  | -1.44818211 |
| 1 | 4.13585997  | -1.95308852 | 1.36291790  | 1 | -3.48633981 | 0.22941145  | -2.46498203 |
| 6 | 2.13806033  | -1.97798848 | 0.55391794  | 6 | -4.49064016 | 2.61881137  | -0.10438204 |
| 6 | 1.11556029  | -0.56578851 | -2.92128205 | 1 | -5.57764006 | 2.56281137  | -0.25488204 |
| 6 | 1.59136033  | -2.96728873 | 1.60391796  | 1 | -4.25224018 | 3.68751144  | -0.03338205 |
| 6 | -0.10053977 | 0.36361146  | -2.74048209 | 6 | -3.78433967 | 2.05161142  | -1.33808208 |
| 1 | -0.88833976 | -0.12358854 | -2.16378212 | 1 | -2.71853971 | 2.31041145  | -1.31108212 |
| 1 | -0.52963978 | 0.61281145  | -3.71888208 | 1 | -4.19553995 | 2.52441144  | -2.23998213 |
| 1 | 0.17136024  | 1.30241144  | -2.24838209 | 8 | -0.24823976 | 1.09011149  | 0.85171795  |
| 6 | 0.62716019  | -1.93038857 | -3.45228195 | 6 | 0.79226023  | 1.74681151  | 0.77931792  |
| 1 | -0.01243977 | -2.42758870 | -2.72028208 | 8 | 0.82596022  | 2.71761131  | -0.12328205 |
| 1 | 1.47666025  | -2.58598852 | -3.67118216 | 6 | 1.95486021  | 1.51011145  | 1.69951797  |
| 1 | 0.05546023  | -1.79538846 | -4.37898207 | 6 | 2.03556037  | 3.47061133  | -0.39678204 |
| 6 | 1.99446034  | 0.06441145  | -4.01548195 | 6 | 2.31036019  | 2.70961142  | 2.59651804  |
| 1 | 2.86916018  | -0.55048859 | -4.25058174 | 6 | 2.40736032  | 4.44751120  | 0.70651793  |
| 1 | 2.34226036  | 1.06831145  | -3.74498200 | 1 | 1.78336024  | 4.00291157  | -1.31458211 |
| 1 | 1.40946031  | 0.16221146  | -4.93638182 | 1 | 2.90166020  | 2.32081127  | 3.43161798  |
| 6 | 2.69586039  | -3.44798875 | 2.56231785  | 1 | 1.39566028  | 3.12281132  | 3.03861785  |
| 1 | 3.10186028  | -2.63328862 | 3.17311788  | 1 | 2.81986022  | 1.19611144  | 1.10011792  |
| 1 | 3.52486038  | -3.92758870 | 2.03181791  | 1 | 1.67886031  | 0.65101147  | 2.30941796  |
| 1 | 2.27756023  | -4.19068861 | 3.25031781  | 6 | 3.11096025  | 3.81011128  | 1.90301788  |
| 6 | 1.04066026  | -4.21328878 | 0.87841791  | 1 | 2.84346032  | 2.76741147  | -0.62218207 |
| 1 | 0.24966024  | -3.94058871 | 0.17741796  | 1 | 1.50166023  | 4.98011160  | 1.02041793  |
| 1 | 0.63056022  | -4.92578840 | 1.60491788  | 1 | 3.06866026  | 5.19961119  | 0.26011795  |
| 1 | 1.83736026  | -4.71878862 | 0.32201797  | 1 | 4.07066011  | 3.39391136  | 1.57021797  |
| 6 | 0.47646022  | -2.36618853 | 2.48481798  | 1 | 3.35196018  | 4.59041119  | 2.63341784  |
| 1 | 0.76066023  | -1.39088857 | 2.89521790  | 1 | 5.09935999  | -0.55408859 | -0.40948203 |

---

# TS-34\_CC

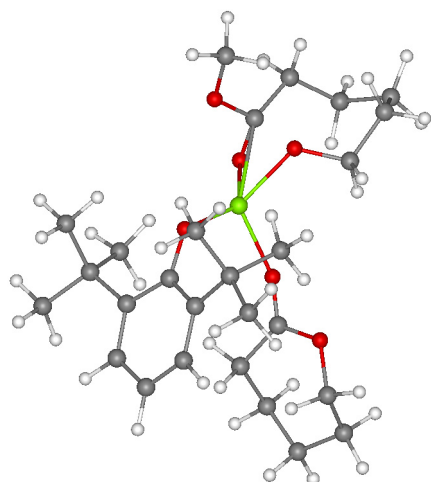

|                                              |                             |
|----------------------------------------------|-----------------------------|
| Zero-point vibrational energy                | 1786096.1 (Joules/Mol)      |
|                                              | 426.88722 (Kcal/Mol)        |
| Zero-point correction=                       | 0.680288 (Hartree/Particle) |
| Thermal correction to Energy=                | 0.717896                    |
| Thermal correction to Enthalpy=              | 0.718841                    |
| Thermal correction to Gibbs Free Energy=     | 0.609286                    |
| Sum of electronic and zero-point Energies=   | -1705.777674                |
| Sum of electronic and thermal Energies=      | -1705.740065                |
| Sum of electronic and thermal Enthalpies=    | -1705.739121                |
| Sum of electronic and thermal Free Energies= | -1705.848676                |

| cartesian |             |             |             |    |             |             |             |  |  |  |  |  |  |
|-----------|-------------|-------------|-------------|----|-------------|-------------|-------------|--|--|--|--|--|--|
| 8         | 0.05624477  | -1.57122314 | -0.39618218 | 1  | -4.37425518 | -1.57902312 | -1.53418219 |  |  |  |  |  |  |
| 6         | 1.37754476  | -1.45982313 | -0.42278218 | 8  | -2.96445537 | 0.19687694  | -0.64928216 |  |  |  |  |  |  |
| 6         | 2.17114472  | -1.98902309 | 0.64811784  | 6  | -3.60495520 | -0.69972306 | 0.84801787  |  |  |  |  |  |  |
| 6         | 3.53784466  | -1.69412315 | 0.66631782  | 8  | -2.68215537 | -0.44902307 | 1.69331777  |  |  |  |  |  |  |
| 1         | 4.15784454  | -2.05532289 | 1.48061776  | 6  | -5.01335526 | -0.20202306 | 1.10591781  |  |  |  |  |  |  |
| 6         | 4.14734459  | -0.94912302 | -0.34208214 | 12 | -1.25645530 | -0.36332306 | 0.27131784  |  |  |  |  |  |  |
| 6         | 3.39364481  | -0.57122302 | -1.45228219 | 1  | -5.68015528 | -0.45692307 | 0.27911782  |  |  |  |  |  |  |
| 1         | 3.90454483  | -0.07602306 | -2.27248216 | 1  | 5.21164465  | -0.72922307 | -0.29788220 |  |  |  |  |  |  |
| 6         | 2.02414465  | -0.84532303 | -1.54648221 | 6  | -3.21575522 | 1.56867695  | -0.91658217 |  |  |  |  |  |  |
| 6         | 1.56134474  | -2.92422295 | 1.71291780  | 1  | -2.77495527 | 2.21737695  | -0.14088216 |  |  |  |  |  |  |
| 6         | 1.27204478  | -0.61362302 | -2.87488222 | 6  | -4.70205545 | 1.88307691  | -1.07418227 |  |  |  |  |  |  |
| 6         | 0.53204477  | -2.21162295 | 2.61091781  | 1  | -2.69615531 | 1.80627692  | -1.85488224 |  |  |  |  |  |  |
| 1         | -0.37365526 | -1.93732309 | 2.06961775  | 1  | -4.81645536 | 2.74487710  | -1.74368227 |  |  |  |  |  |  |
| 1         | 0.21684477  | -2.87582302 | 3.42471790  | 6  | -5.44525528 | 2.18587708  | 0.23511782  |  |  |  |  |  |  |
| 1         | 0.95464474  | -1.31182313 | 3.07161784  | 1  | -5.16145515 | 1.03587687  | -1.59728217 |  |  |  |  |  |  |
| 6         | 0.88294476  | -4.12022305 | 1.01161778  | 1  | -5.34085512 | -0.79462302 | 1.96971774  |  |  |  |  |  |  |
| 1         | 0.09744477  | -3.78632307 | 0.33181781  | 6  | -5.08565521 | 1.29307687  | 1.43031776  |  |  |  |  |  |  |

|   |             |             |             |   |             |            |             |
|---|-------------|-------------|-------------|---|-------------|------------|-------------|
| 1 | 1.61744475  | -4.69512320 | 0.43711782  | 1 | -4.12705517 | 1.59347689 | 1.86421776  |
| 1 | 0.43584475  | -4.79092312 | 1.75561774  | 1 | -5.83135509 | 1.45707691 | 2.21591783  |
| 6 | 2.63744473  | -3.50162292 | 2.64991784  | 1 | -6.52445507 | 2.12237692 | 0.04461783  |
| 1 | 3.41394472  | -4.04512310 | 2.10171771  | 1 | -5.25455523 | 3.22717690 | 0.52411783  |
| 1 | 3.12154484  | -2.72942305 | 3.25911784  | 8 | -0.09695524 | 1.24047685 | 0.77591783  |
| 1 | 2.16844463  | -4.20982313 | 3.34151769  | 6 | 0.98724478  | 1.82047689 | 0.70571786  |
| 6 | 2.20404482  | -0.06312306 | -3.96858239 | 8 | 1.11084473  | 2.75087690 | -0.23328216 |
| 1 | 2.58974481  | 0.93377697  | -3.72438216 | 6 | 2.10854483  | 1.54397690 | 1.66541779  |
| 1 | 3.05534482  | -0.72442305 | -4.15958214 | 6 | 2.37964463  | 3.39537692 | -0.51068217 |
| 1 | 1.64584470  | 0.02707694  | -4.90678215 | 6 | 2.53144479  | 2.75407696 | 2.51761770  |
| 6 | 0.73364478  | -1.97232306 | -3.37228227 | 6 | 2.80394483  | 4.39097691 | 0.55671787  |
| 1 | 0.05994476  | -2.41722298 | -2.63718224 | 1 | 2.18824482  | 3.90377712 | -1.45628226 |
| 1 | 0.18374476  | -1.84152305 | -4.31278181 | 1 | 3.07084465  | 2.36207700 | 3.38581777  |
| 1 | 1.55724478  | -2.67072296 | -3.55558228 | 1 | 1.64034474  | 3.25537705 | 2.91441774  |
| 6 | 0.09504475  | 0.37497693  | -2.75848222 | 1 | 2.96204472  | 1.14247692 | 1.10251784  |
| 1 | 0.39314476  | 1.31187689  | -2.27808213 | 1 | 1.75554478  | 0.73607695 | 2.30501771  |
| 1 | -0.28235525 | 0.62177694  | -3.75858212 | 6 | 3.43004465  | 3.75827694 | 1.79781783  |
| 1 | -0.74295521 | -0.05692307 | -2.20898223 | 1 | 3.13574481  | 2.62367702 | -0.68698215 |
| 8 | -3.47085524 | -1.95982313 | 0.29901785  | 1 | 1.93604469  | 5.00587654 | 0.82391787  |
| 6 | -4.32905531 | -2.35782290 | -0.76918215 | 1 | 3.53104472  | 5.06857681 | 0.09331783  |
| 1 | -5.33185530 | -2.60052299 | -0.40168220 | 1 | 4.36224461  | 3.25577712 | 1.50871778  |
| 1 | -3.87985539 | -3.25822306 | -1.19058216 | 1 | 3.71384478  | 4.55097675 | 2.49901772  |

#### I-4\_CC

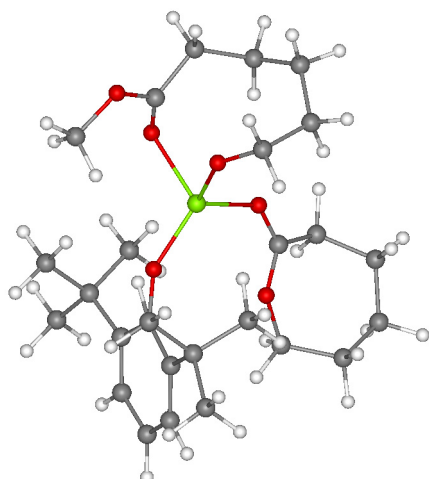

|                                          |                             |
|------------------------------------------|-----------------------------|
| Zero-point vibrational energy            | 1785379.5 (Joules/Mol)      |
|                                          | 426.71594 (Kcal/Mol)        |
| Zero-point correction=                   | 0.680015 (Hartree/Particle) |
| Thermal correction to Energy=            | 0.718940                    |
| Thermal correction to Enthalpy=          | 0.719884                    |
| Thermal correction to Gibbs Free Energy= | 0.606721                    |



|                                              |              |
|----------------------------------------------|--------------|
| Sum of electronic and zero-point Energies=   | -1705.795516 |
| Sum of electronic and thermal Energies=      | -1705.756591 |
| Sum of electronic and thermal Enthalpies=    | -1705.755647 |
| Sum of electronic and thermal Free Energies= | -1705.868810 |

| cartesian |             |             |             |   |             |             |             |  |  |  |  |
|-----------|-------------|-------------|-------------|---|-------------|-------------|-------------|--|--|--|--|
| 12        | -1.31694233 | -0.37061539 | 0.06525776  | 1 | 0.59645766  | -1.11561537 | 3.93375778  |  |  |  |  |
| 8         | -4.11644220 | -2.53401542 | 0.44225776  | 1 | 0.16045766  | -0.56181538 | 2.31735778  |  |  |  |  |
| 6         | -3.08504224 | -3.52941537 | 0.32925773  | 8 | -2.63994241 | -1.15431535 | 1.43725777  |  |  |  |  |
| 1         | -2.35734224 | -3.21721530 | -0.42234224 | 6 | -3.75714231 | -1.34901536 | 0.92015779  |  |  |  |  |
| 1         | -3.59404230 | -4.43581533 | 0.00475775  | 6 | -4.93104267 | -0.41631538 | 1.03005779  |  |  |  |  |
| 1         | -2.59114242 | -3.68531537 | 1.28935766  | 8 | -2.81434226 | -0.38061538 | -1.08194232 |  |  |  |  |
| 8         | 0.29085767  | -1.35411537 | -0.04504225 | 6 | -4.64674234 | 1.09118462  | 0.94165778  |  |  |  |  |
| 6         | 1.60835767  | -1.38961542 | -0.16484225 | 1 | -5.68024254 | -0.72811538 | 0.29905778  |  |  |  |  |
| 6         | 2.23075771  | -1.23641539 | -1.44854224 | 1 | -5.35644245 | -0.65131539 | 2.01625776  |  |  |  |  |
| 6         | 3.62595773  | -1.14701545 | -1.50544226 | 6 | -3.49894238 | 0.36258462  | -2.03124213 |  |  |  |  |
| 1         | 4.11855745  | -1.00551534 | -2.46184206 | 1 | -3.60854220 | 1.29068458  | 1.22495770  |  |  |  |  |
| 6         | 4.42395735  | -1.25001538 | -0.36894226 | 1 | -5.26184273 | 1.57818460  | 1.70725775  |  |  |  |  |
| 6         | 3.81735778  | -1.51241541 | 0.85625780  | 1 | -4.39934254 | -0.18531539 | -2.36784220 |  |  |  |  |
| 1         | 4.45565748  | -1.65471542 | 1.72255766  | 1 | -2.88744235 | 0.51458460  | -2.93974209 |  |  |  |  |
| 6         | 2.42895770  | -1.61201537 | 0.99135774  | 6 | -4.98244238 | 1.75928462  | -0.40544224 |  |  |  |  |
| 6         | 1.41225767  | -1.20921540 | -2.75604224 | 1 | -5.91834259 | 1.33058465  | -0.79064220 |  |  |  |  |
| 6         | 1.81855774  | -1.99531543 | 2.35415792  | 1 | -5.21224260 | 2.81228471  | -0.19624224 |  |  |  |  |
| 6         | 0.56825763  | 0.07378461  | -2.87534213 | 6 | -3.92484236 | 1.73968458  | -1.51574230 |  |  |  |  |
| 1         | -0.19644235 | 0.14078462  | -2.10044217 | 1 | -3.02454233 | 2.26438451  | -1.16584229 |  |  |  |  |
| 1         | 0.04755765  | 0.09988461  | -3.84004211 | 1 | -4.31594276 | 2.32548451  | -2.36054206 |  |  |  |  |
| 1         | 1.20115769  | 0.96528459  | -2.80724216 | 8 | -0.88794237 | 1.52528465  | 0.82615775  |  |  |  |  |
| 6         | 0.50065762  | -2.45101547 | -2.83864212 | 6 | 0.17585765  | 2.15278459  | 0.88395774  |  |  |  |  |
| 1         | -0.18944235 | -2.49651551 | -1.99614227 | 8 | 1.19855773  | 1.69108462  | 0.19675776  |  |  |  |  |
| 1         | 1.10365772  | -3.36561537 | -2.83794212 | 6 | 0.28685766  | 3.42208457  | 1.68575776  |  |  |  |  |
| 1         | -0.08524235 | -2.43131542 | -3.76554227 | 6 | 2.54085779  | 2.23448467  | 0.29915774  |  |  |  |  |
| 6         | 2.31595778  | -1.24731541 | -4.00314236 | 6 | 0.65885764  | 4.65878439  | 0.84745777  |  |  |  |  |
| 1         | 2.97025776  | -2.12531543 | -4.01004219 | 6 | 2.68005776  | 3.59928465  | -0.35244226 |  |  |  |  |
| 1         | 2.94025779  | -0.35171539 | -4.09834194 | 1 | 3.13985777  | 1.47878456  | -0.20944224 |  |  |  |  |
| 1         | 1.68835771  | -1.29841542 | -4.89964199 | 1 | 0.38035762  | 5.54238462  | 1.43105769  |  |  |  |  |
| 6         | 2.89535761  | -2.35411549 | 3.39385772  | 1 | 0.03975765  | 4.68448448  | -0.05704224 |  |  |  |  |
| 1         | 3.53945780  | -1.50351536 | 3.64385772  | 1 | 1.02575767  | 3.27288461  | 2.48315787  |  |  |  |  |
| 1         | 3.53195763  | -3.18001533 | 3.05975795  | 1 | -0.68324238 | 3.55868459  | 2.16525793  |  |  |  |  |
| 1         | 2.40715766  | -2.67161536 | 4.32215786  | 6 | 2.14005780  | 4.76078463  | 0.48205775  |  |  |  |  |
| 6         | 0.92315763  | -3.24171543 | 2.19795775  | 1 | 2.83755779  | 2.24498463  | 1.35305774  |  |  |  |  |
| 1         | 0.11915766  | -3.06381536 | 1.48345768  | 1 | 2.19925761  | 3.56588459  | -1.33704233 |  |  |  |  |

|   |            |             |            |   |            |             |             |
|---|------------|-------------|------------|---|------------|-------------|-------------|
| 1 | 0.48095763 | -3.51541543 | 3.16415787 | 1 | 3.74875760 | 3.75808454  | -0.53714222 |
| 1 | 1.51495767 | -4.09321547 | 1.84435773 | 1 | 2.72835779 | 4.83808470  | 1.40625775  |
| 6 | 1.00145769 | -0.83561540 | 2.95365787 | 1 | 2.30405760 | 5.69788456  | -0.06144224 |
| 1 | 1.63455772 | 0.04908461  | 3.09485793 | 1 | 5.50635767 | -1.17701542 | -0.44584227 |

### TS-45\_CC

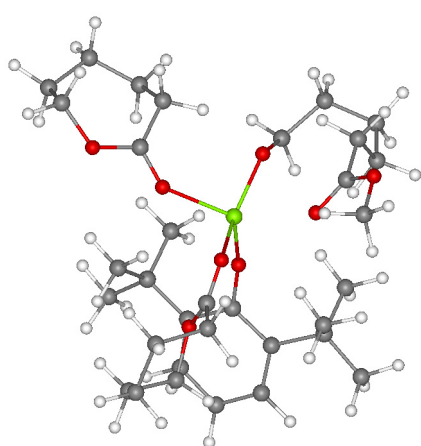

|                                             |                             |
|---------------------------------------------|-----------------------------|
| Zero-point vibrational energy               | 2202689.7 (Joules/Mol)      |
|                                             | 526.45548 (Kcal/Mol)        |
| Zero-point correction                       | 0.838960 (Hartree/Particle) |
| Thermal correction to Energy                | 0.886166                    |
| Thermal correction to Enthalpy              | 0.887110                    |
| Thermal correction to Gibbs Free Energy     | 0.754432                    |
| Sum of electronic and zero-point Energies   | -2090.658608                |
| Sum of electronic and Thermal Energies      | -2090.611402                |
| Sum of electronic and Thermal Enthalpies    | -2090.610457                |
| Sum of electronic and Thermal Free Energies | -2090.743136                |

| cartesian |            |             |            |    |             |             |             |
|-----------|------------|-------------|------------|----|-------------|-------------|-------------|
| 8         | 0.70412910 | -0.07527923 | 1.06377423 | 1  | -0.63107091 | 5.26272058  | 1.27927423  |
| 6         | 1.82382905 | -0.64457923 | 1.47887421 | 1  | -0.53757089 | 3.50122070  | 1.12777424  |
| 6         | 1.86502910 | -2.04957914 | 1.81007421 | 6  | -3.06387091 | 2.92782068  | 2.33197427  |
| 6         | 3.10332918 | -2.64157915 | 2.09337425 | 6  | -2.17767096 | 4.18692064  | 2.34927416  |
| 1         | 3.14902902 | -3.70697927 | 2.31467414 | 1  | -3.87237096 | 3.03302073  | 1.58847427  |
| 6         | 4.28932905 | -1.91067922 | 2.11867428 | 12 | -0.63257092 | 0.50382078  | -0.19302575 |
| 6         | 4.22962904 | -0.53097922 | 1.92987418 | 1  | -2.65407085 | 3.54242086  | -0.24062575 |
| 1         | 5.15012932 | 0.04312077  | 2.02547431 | 1  | -2.50997090 | 5.33692074  | -0.34792575 |
| 6         | 3.03002906 | 0.13342077  | 1.64537418 | 1  | 5.23942900  | -2.40107918 | 2.33437419  |
| 6         | 0.58752912 | -2.91887927 | 1.86227417 | 1  | -3.55997086 | 2.84952068  | 3.31527424  |
| 6         | 3.02282906 | 1.67692077  | 1.56157422 | 1  | -2.82017088 | 5.07982063  | 2.44397426  |
| 6         | 0.07322913 | -3.19937921 | 0.43377426 | 1  | -1.55317092 | 4.16482067  | 3.25807428  |

---

|   |             |             |             |   |             |             |             |
|---|-------------|-------------|-------------|---|-------------|-------------|-------------|
| 1 | -0.10647088 | -2.27867913 | -0.12752575 | 8 | -1.85177088 | -0.95287919 | -1.20672584 |
| 1 | -0.86717087 | -3.77427912 | 0.46567425  | 6 | -3.02797079 | -1.32247925 | -1.18362582 |
| 1 | 0.81082910  | -3.79497910 | -0.12552576 | 6 | -4.08907080 | -0.66807920 | -0.33992577 |
| 6 | -0.50967085 | -2.23287916 | 2.70977426  | 8 | -3.32077098 | -2.38067913 | -1.96602583 |
| 1 | -0.76127088 | -1.24047923 | 2.32277417  | 6 | -4.60017109 | -1.57107925 | 0.80517423  |
| 1 | -0.16937086 | -2.11447930 | 3.74907422  | 1 | -4.93307066 | -0.36867923 | -0.98432577 |
| 1 | -1.41697085 | -2.85827923 | 2.72387433  | 1 | -3.60387087 | 0.24302077  | 0.06207424  |
| 6 | 0.84032911  | -4.29237938 | 2.51957417  | 6 | -4.67177105 | -2.93207932 | -2.00302577 |
| 1 | 1.24762905  | -4.19117928 | 3.53547430  | 1 | -3.74057078 | -2.03897929 | 1.31037426  |
| 1 | 1.52582908  | -4.92027950 | 1.93257427  | 1 | -5.07017088 | -0.91677922 | 1.55337417  |
| 1 | -0.11497088 | -4.83377934 | 2.59227419  | 1 | -5.37817097 | -2.14397931 | -2.30752587 |
| 6 | 4.37752914  | 2.29232073  | 1.96867418  | 1 | -4.60617113 | -3.66657925 | -2.81452584 |
| 1 | 5.18782902  | 2.01672077  | 1.27767420  | 6 | -5.61217070 | -2.63637924 | 0.37157425  |
| 1 | 4.67472887  | 1.99732077  | 2.98487425  | 1 | -6.51627111 | -2.13227916 | -0.01202575 |
| 1 | 4.28952932  | 3.38882089  | 1.95077419  | 1 | -5.93277073 | -3.21337914 | 1.25277424  |
| 6 | 1.96852911  | 2.24642086  | 2.53947425  | 6 | -5.09987068 | -3.60237932 | -0.70222580 |
| 1 | 0.97392911  | 1.83862078  | 2.33017421  | 1 | -4.25407076 | -4.20017958 | -0.32542574 |
| 1 | 1.92862916  | 3.34422088  | 2.45977426  | 1 | -5.89807081 | -4.31957960 | -0.95412576 |
| 1 | 2.23482919  | 1.99102080  | 3.57557416  | 8 | 0.36852914  | 0.46722075  | -2.06332564 |
| 6 | 2.73502922  | 2.16752076  | 0.12637424  | 6 | 1.40732908  | -0.09357923 | -2.42722583 |
| 1 | 3.50082922  | 1.78912079  | -0.56902575 | 6 | 2.02432919  | 0.19772077  | -3.77482581 |
| 1 | 2.75852919  | 3.26782084  | 0.08527425  | 8 | 1.95822906  | -0.98467922 | -1.60702574 |
| 1 | 1.75262916  | 1.84552085  | -0.22862574 | 6 | 2.10482907  | -1.02877915 | -4.70922565 |
| 8 | -0.96197093 | 5.22452068  | -2.21242571 | 1 | 3.03352904  | 0.61522079  | -3.61872578 |
| 6 | -0.05207087 | 5.05812073  | -3.32452583 | 1 | 1.40872908  | 0.98732078  | -4.22042561 |
| 1 | -0.32717088 | 4.17622042  | -3.91722584 | 6 | 3.26302910  | -1.59367919 | -1.86402583 |
| 1 | -0.15127087 | 5.97182035  | -3.91912580 | 1 | 1.14712906  | -1.57277918 | -4.67942572 |
| 1 | 0.97762913  | 4.93942070  | -2.96402574 | 1 | 2.21472907  | -0.65447921 | -5.73792553 |
| 8 | -0.30797088 | 3.17542076  | -1.49242580 | 1 | 4.00082922  | -0.79387921 | -2.03062582 |
| 6 | -0.99697089 | 4.17492056  | -1.34032583 | 1 | 3.49092913  | -2.07357931 | -0.90472579 |
| 8 | -2.08487082 | 1.41472077  | 0.66647422  | 6 | 3.26742911  | -1.98087931 | -4.40552568 |
| 6 | -1.96017087 | 4.39722061  | -0.20732576 | 1 | 4.21632910  | -1.43117917 | -4.53172541 |
| 6 | -2.33467078 | 1.60282075  | 2.03517413  | 1 | 3.27612901  | -2.78487921 | -5.15762568 |
| 6 | -1.23427093 | 4.34882069  | 1.14997423  | 6 | 3.23952913  | -2.60157919 | -3.00452590 |
| 1 | -1.40297091 | 1.56862080  | 2.64277411  | 1 | 2.35722899  | -3.24957919 | -2.87792587 |
| 1 | -2.97247100 | 0.78012079  | 2.43727422  | 1 | 4.12092924  | -3.25057912 | -2.87892580 |

---

## I-5\_CC

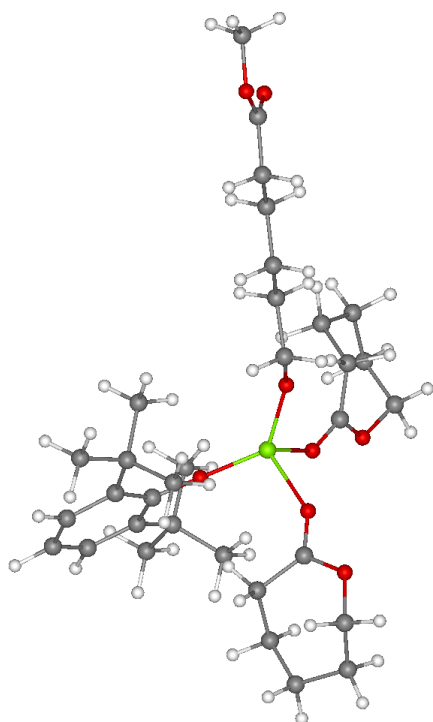

|                                              |                             |
|----------------------------------------------|-----------------------------|
| Zero-point vibrational energy                | 2200979.7 (Joules/Mol)      |
|                                              | 526.04676 (Kcal/Mol)        |
| Zero-point correction=                       | 0.838309 (Hartree/Particle) |
| Thermal correction to Energy=                | 0.887169                    |
| Thermal correction to Enthalpy=              | 0.888113                    |
| Thermal correction to Gibbs Free Energy=     | 0.747361                    |
| Sum of electronic and zero-point Energies=   | -2090.672967                |
| Sum of electronic and thermal Energies=      | -2090.624107                |
| Sum of electronic and thermal Enthalpies=    | -2090.623163                |
| Sum of electronic and thermal Free Energies= | -2090.763914                |

| cartesian |             |             |             |   |             |             |             |  |  |  |  |
|-----------|-------------|-------------|-------------|---|-------------|-------------|-------------|--|--|--|--|
| 8         | -1.25303173 | 0.46260831  | -0.91945100 | 6 | 3.85036826  | -1.57279170 | 3.39174891  |  |  |  |  |
| 6         | -2.31623173 | -0.32219172 | -1.34725094 | 1 | 4.65946817  | -1.17689168 | 3.99624896  |  |  |  |  |
| 6         | -3.63003159 | 0.06570829  | -0.66225100 | 6 | 3.15536833  | -0.72649169 | 2.52264905  |  |  |  |  |
| 6         | -4.82033205 | -0.79089171 | -1.09295106 | 6 | 0.49376822  | -3.25419188 | 1.19834900  |  |  |  |  |
| 6         | -6.13663197 | -0.37349170 | -0.43515098 | 6 | 3.50556827  | 0.77320832  | 2.47344899  |  |  |  |  |
| 6         | -7.30663204 | -1.25789165 | -0.85415095 | 6 | 0.68556821  | -3.28739166 | -0.33005098 |  |  |  |  |
| 6         | -8.63063145 | -0.83559173 | -0.26265097 | 1 | 0.85546821  | -2.28999186 | -0.73745096 |  |  |  |  |
| 8         | -9.58473110 | -1.76839173 | -0.49635097 | 1 | -0.20013174 | -3.70659161 | -0.82265097 |  |  |  |  |
| 1         | -2.14063168 | -1.39809167 | -1.15685105 | 1 | 1.54656827  | -3.91279173 | -0.59415096 |  |  |  |  |
| 1         | -2.45823169 | -0.23199171 | -2.44215107 | 6 | -0.77013177 | -2.44969177 | 1.56464911  |  |  |  |  |
| 1         | -3.48663163 | -0.00929171 | 0.42344904  | 1 | -0.69683176 | -1.40429175 | 1.26234913  |  |  |  |  |

---

|    |              |             |             |   |             |             |             |
|----|--------------|-------------|-------------|---|-------------|-------------|-------------|
| 1  | -3.83713174  | 1.12320828  | -0.87745100 | 1 | -0.93383175 | -2.47749186 | 2.64744902  |
| 1  | -4.61243200  | -1.84419167 | -0.85795099 | 1 | -1.65303171 | -2.88319159 | 1.07914901  |
| 1  | -4.92963171  | -0.74169171 | -2.18585110 | 6 | 0.22676824  | -4.70809174 | 1.62934899  |
| 6  | -10.88983154 | -1.44729173 | 0.00434902  | 1 | 0.04166825  | -4.79279137 | 2.70524907  |
| 12 | 0.57596827   | 0.37700829  | -0.56125098 | 1 | 1.05096829  | -5.38069153 | 1.36754894  |
| 8  | 1.06506824   | 2.38550806  | -0.53875101 | 1 | -0.66793174 | -5.07649136 | 1.11474895  |
| 6  | 0.46066827   | 3.45830822  | -0.55155098 | 6 | 4.59316826  | 1.15640831  | 3.49334908  |
| 6  | -1.03763175  | 3.55460835  | -0.57595098 | 1 | 5.54676819  | 0.65420830  | 3.29634905  |
| 8  | 1.21646833   | 4.55430841  | -0.52225101 | 1 | 4.29316807  | 0.93280828  | 4.52264929  |
| 6  | -1.62233174  | 4.11240864  | 0.73474902  | 1 | 4.77766800  | 2.23520851  | 3.43304896  |
| 1  | -1.34573174  | 4.18380833  | -1.42095089 | 6 | 2.26036835  | 1.61260831  | 2.82554889  |
| 1  | -1.39723170  | 2.53350830  | -0.75925100 | 1 | 1.42876828  | 1.39430833  | 2.15494895  |
| 6  | 0.63196826   | 5.87720823  | -0.49725097 | 1 | 2.49066830  | 2.68340826  | 2.75934887  |
| 1  | -1.13893175  | 3.62210846  | 1.58774900  | 1 | 1.93516827  | 1.39760828  | 3.84944892  |
| 1  | -2.67433167  | 3.81350851  | 0.77374899  | 6 | 4.04736805  | 1.16900826  | 1.08664894  |
| 1  | -0.00253175  | 6.01190853  | -1.38015103 | 1 | 4.97326803  | 0.62250829  | 0.87244904  |
| 1  | 1.50166833   | 6.52620840  | -0.60745096 | 1 | 4.27406788  | 2.24180841  | 1.05214906  |
| 6  | -1.53173172  | 5.63130856  | 0.86954904  | 1 | 3.32676840  | 0.95480829  | 0.29784903  |
| 1  | -2.13903165  | 6.09420824  | 0.07974902  | 8 | 1.67166829  | -0.03809170 | -2.27645111 |
| 1  | -1.98383164  | 5.93690825  | 1.81974912  | 6 | 2.59546828  | -0.70059168 | -2.74295115 |
| 6  | -0.11243175  | 6.19640827  | 0.79124904  | 8 | 2.68436837  | -0.72869170 | -4.07065105 |
| 1  | 0.49536824   | 5.85000849  | 1.63574910  | 6 | 3.59966826  | -1.42799175 | -1.89015102 |
| 1  | -0.15833175  | 7.28900862  | 0.87234902  | 6 | 3.68036819  | -1.52029169 | -4.75895071 |
| 1  | -6.36563206  | 0.66840827  | -0.68395096 | 6 | 5.03696823  | -0.89369172 | -2.03445101 |
| 1  | -6.03283215  | -0.40499172 | 0.65564901  | 6 | 5.09836817  | -0.99479175 | -4.60405064 |
| 1  | -7.13383198  | -2.30629158 | -0.58665097 | 1 | 3.35866833  | -1.45909166 | -5.79925060 |
| 1  | -7.42783213  | -1.25289166 | -1.94535089 | 1 | 5.58996820  | -1.22489166 | -1.15055108 |
| 8  | -8.85013103  | 0.19820829  | 0.33494902  | 1 | 5.02446795  | 0.20120829  | -1.99075103 |
| 1  | -11.52273178 | -2.29269171 | -0.26415098 | 1 | 3.57056832  | -2.49759150 | -2.13305116 |
| 1  | -10.86513138 | -1.31809175 | 1.08874893  | 1 | 3.25776839  | -1.32359171 | -0.85955095 |
| 1  | -11.26413155 | -0.52939171 | -0.45475098 | 6 | 5.77266788  | -1.37129176 | -3.28545094 |
| 8  | 1.49596834   | -0.52699172 | 0.81274903  | 1 | 3.59416819  | -2.56529188 | -4.44165087 |
| 6  | 2.10396838   | -1.27949166 | 1.71854901  | 1 | 5.08116817  | 0.09320830  | -4.74055099 |
| 6  | 1.72176826   | -2.64909172 | 1.90644908  | 1 | 5.68516827  | -1.40139174 | -5.43645096 |
| 6  | 2.46516824   | -3.43399191 | 2.79384899  | 1 | 5.87846804  | -2.46359158 | -3.24065113 |
| 1  | 2.20576835   | -4.47759151 | 2.93744898  | 1 | 6.79066801  | -0.96629167 | -3.27635098 |
| 6  | 3.53486824   | -2.92119169 | 3.51984906  | 1 | 4.09686804  | -3.55799150 | 4.19894934  |

---

## S1.4. PP sequence, mononuclear mechanism

### I-1\_PP

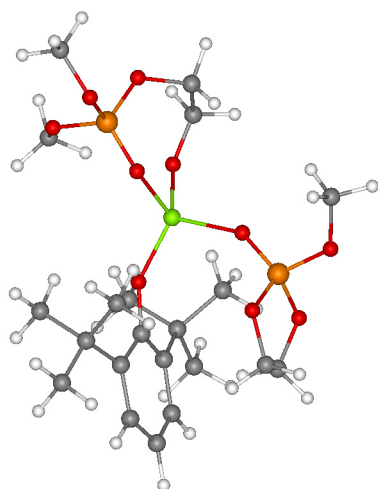

|                                              |                             |
|----------------------------------------------|-----------------------------|
| Zero-point vibrational energy                | 1565337.6 (Joules/Mol)      |
|                                              | 374.12466 (Kcal/Mol)        |
| Zero-point correction=                       | 0.596206 (Hartree/Particle) |
| Thermal correction to Energy=                | 0.637320                    |
| Thermal correction to Enthalpy=              | 0.638265                    |
| Thermal correction to Gibbs Free Energy=     | 0.519129                    |
| Sum of electronic and zero-point Energies=   | -2457.219233                |
| Sum of electronic and thermal Energies=      | -2457.178118                |
| Sum of electronic and thermal Enthalpies=    | -2457.177174                |
| Sum of electronic and thermal Free Energies= | -2457.296310                |

| cartesian |             |             |             |    |             |             |             |  |  |  |  |
|-----------|-------------|-------------|-------------|----|-------------|-------------|-------------|--|--|--|--|
| 12        | 1.04106259  | 0.46429029  | -0.51320416 | 6  | -0.06723739 | -2.78090978 | 2.05299592  |  |  |  |  |
| 8         | 4.91156292  | 0.12579030  | 1.73039579  | 1  | -0.61943740 | -3.70210981 | 1.83579588  |  |  |  |  |
| 8         | -0.31403738 | -0.82090962 | -0.21170413 | 1  | 0.64906263  | -2.99660969 | 2.85539603  |  |  |  |  |
| 6         | 6.29556274  | -0.26580968 | 1.72299588  | 1  | 0.48886263  | -2.49670959 | 1.15899587  |  |  |  |  |
| 1         | 6.69126272  | 0.01549029  | 2.69829607  | 1  | 6.38236284  | -1.34560966 | 1.58329582  |  |  |  |  |
| 1         | 6.83856249  | 0.26389030  | 0.93609583  | 8  | 2.61926270  | 0.40089029  | 0.77769583  |  |  |  |  |
| 6         | -1.59023738 | -1.07430971 | 0.01999586  | 15 | 3.99266267  | -0.09800971 | 0.45569587  |  |  |  |  |
| 6         | -2.53813720 | -1.09500968 | -1.05890417 | 8  | 4.71986294  | 0.61379027  | -0.76440418 |  |  |  |  |
| 6         | -3.89733744 | -1.21540964 | -0.74570417 | 8  | 2.13116264  | 0.34819031  | -2.06280398 |  |  |  |  |
| 1         | -4.63643742 | -1.20110965 | -1.53980422 | 6  | 4.10096264  | 1.66549027  | -1.56730413 |  |  |  |  |
| 6         | -4.34753752 | -1.36200964 | 0.56409585  | 6  | 3.16106272  | 1.07349026  | -2.61140394 |  |  |  |  |
| 6         | -3.41013718 | -1.47650969 | 1.58849585  | 1  | 4.94266272  | 2.19369030  | -2.02360415 |  |  |  |  |
| 1         | -3.77173710 | -1.67380965 | 2.59279585  | 1  | 3.56926274  | 2.34689021  | -0.89510417 |  |  |  |  |
| 6         | -2.03503728 | -1.37450969 | 1.35289586  | 1  | 2.81276274  | 1.93389034  | -3.21850395 |  |  |  |  |

|   |             |             |             |    |             |             |             |
|---|-------------|-------------|-------------|----|-------------|-------------|-------------|
| 6 | -2.09403729 | -1.04770970 | -2.53580403 | 1  | 3.77196264  | 0.45199031  | -3.29300404 |
| 6 | -1.03533745 | -1.66200972 | 2.49179602  | 8  | 4.15866280  | -1.65220964 | 0.19549584  |
| 6 | -1.08473742 | -2.18080974 | -2.81260395 | 1  | -5.41103745 | -1.44600964 | 0.77579582  |
| 1 | -0.20483740 | -2.09350967 | -2.17450404 | 6  | 3.75476265  | -2.29200959 | -1.04470420 |
| 1 | -0.75613737 | -2.14680958 | -3.85840416 | 1  | 3.04986262  | -1.66840971 | -1.60130417 |
| 1 | -1.54763734 | -3.15780973 | -2.63390398 | 1  | 3.29206276  | -3.23720980 | -0.76170415 |
| 6 | -1.47173738 | 0.30949029  | -2.92030406 | 1  | 4.65366268  | -2.47220969 | -1.63720417 |
| 1 | -0.48333740 | 0.45689029  | -2.48410416 | 8  | 0.26696262  | 2.31459022  | -0.12050415 |
| 1 | -2.11753726 | 1.14269030  | -2.62430406 | 15 | -0.92173743 | 3.08829021  | 0.33689585  |
| 1 | -1.33363736 | 0.36309028  | -4.00710392 | 8  | -2.28433728 | 2.97299027  | -0.47570416 |
| 6 | -3.28023720 | -1.26570964 | -3.49430394 | 8  | -1.45113742 | 2.65049028  | 1.78199589  |
| 1 | -4.01353741 | -0.45250973 | -3.44590402 | 6  | -3.29463720 | 2.30009031  | 0.32909587  |
| 1 | -3.79953718 | -2.21080971 | -3.30380416 | 6  | -2.89643717 | 2.56189036  | 1.78299582  |
| 1 | -2.90643740 | -1.29980969 | -4.52360392 | 8  | -0.63553739 | 4.64799023  | 0.32499588  |
| 6 | -1.73983741 | -2.16340971 | 3.76529598  | 6  | 0.69686264  | 5.16429043  | 0.53309584  |
| 1 | -2.33063722 | -3.06740975 | 3.58289599  | 1  | 1.41316259  | 4.62679052  | -0.08940414 |
| 1 | -2.39683723 | -1.40670967 | 4.20929575  | 1  | 0.96996260  | 5.07759047  | 1.58709586  |
| 1 | -0.98373735 | -2.41200972 | 4.51829576  | 1  | 0.65566260  | 6.21339035  | 0.24409586  |
| 6 | -0.23563738 | -0.40990970 | 2.89459586  | 1  | -3.17413735 | 1.73489034  | 2.43549585  |
| 1 | 0.35836262  | -0.02070969 | 2.06919599  | 1  | -3.29583716 | 3.50559044  | 2.16549587  |
| 1 | 0.45746261  | -0.65010965 | 3.71009588  | 1  | -4.25633717 | 2.74199033  | 0.06929585  |
| 1 | -0.89983737 | 0.38719028  | 3.24399590  | 1  | -3.28363729 | 1.23719025  | 0.08139586  |

### TS-12\_PP

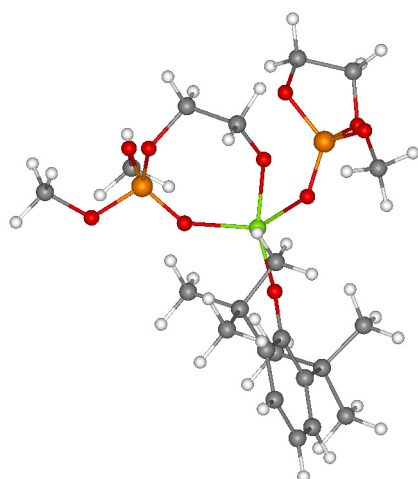

|                                            |                             |
|--------------------------------------------|-----------------------------|
| Zero-point vibrational energy              | 1565406.4 (Joules/Mol)      |
|                                            | 374.14112 (Kcal/Mol)        |
| Zero-point correction=                     | 0.596232 (Hartree/Particle) |
| Thermal correction to Energy=              | 0.636346                    |
| Thermal correction to Enthalpy=            | 0.637290                    |
| Thermal correction to Gibbs Free Energy=   | 0.521406                    |
| Sum of electronic and zero-point Energies= | -2457.215883                |

|                                              |              |
|----------------------------------------------|--------------|
| Sum of electronic and thermal Energies=      | -2457.175769 |
| Sum of electronic and thermal Enthalpies=    | -2457.174824 |
| Sum of electronic and thermal Free Energies= | -2457.290708 |

| cartesian |             |             |             |    |             |             |             |  |  |  |  |
|-----------|-------------|-------------|-------------|----|-------------|-------------|-------------|--|--|--|--|
| 12        | -0.52497226 | -0.17979024 | -0.12329715 | 6  | 1.74002779  | 2.58320999  | 0.97760284  |  |  |  |  |
| 8         | -1.52607226 | 3.78060985  | -1.48109710 | 1  | 2.36912775  | 3.24040985  | 0.36730283  |  |  |  |  |
| 8         | 1.32692766  | -0.28209025 | -0.04479715 | 1  | 1.15312767  | 3.21320987  | 1.65830290  |  |  |  |  |
| 6         | -2.17277217 | 5.04501009  | -1.23559713 | 1  | 1.05622768  | 2.07070994  | 0.29970282  |  |  |  |  |
| 1         | -1.55597234 | 5.79461002  | -1.72909713 | 1  | -3.17937207 | 5.05160999  | -1.66159713 |  |  |  |  |
| 1         | -2.21477222 | 5.24060965  | -0.16279715 | 8  | -1.54717231 | -1.89929020 | -0.48859715 |  |  |  |  |
| 6         | 2.65212774  | -0.23429024 | -0.07189716 | 15 | -2.66597223 | -2.24179006 | 0.45280284  |  |  |  |  |
| 6         | 3.38422775  | -1.07299030 | -0.97249711 | 8  | -3.40027213 | -3.54679012 | -0.20009714 |  |  |  |  |
| 6         | 4.78042746  | -1.00739026 | -0.96089715 | 8  | -4.02247238 | -1.35909021 | 0.58510286  |  |  |  |  |
| 1         | 5.35512781  | -1.63579023 | -1.63339710 | 6  | -4.78337240 | -3.55689001 | 0.14750285  |  |  |  |  |
| 6         | 5.47362757  | -0.15549025 | -0.10729715 | 6  | -5.18627262 | -2.08489013 | 0.13610286  |  |  |  |  |
| 6         | 4.75622749  | 0.66180974  | 0.75950289  | 1  | -4.91617250 | -4.00729036 | 1.13770282  |  |  |  |  |
| 1         | 5.31192780  | 1.32280970  | 1.41640282  | 1  | -5.31997252 | -4.14729023 | -0.59679711 |  |  |  |  |
| 6         | 3.35882783  | 0.65200973  | 0.80300289  | 1  | -5.43677235 | -1.73999023 | -0.87139714 |  |  |  |  |
| 6         | 2.66772771  | -2.03529024 | -1.93849719 | 1  | -6.00477219 | -1.85739028 | 0.82110286  |  |  |  |  |
| 6         | 2.61422777  | 1.59060979  | 1.77120292  | 8  | -2.29977226 | -2.77099013 | 1.90330291  |  |  |  |  |
| 6         | 1.76542771  | -1.24719024 | -2.91059732 | 6  | -0.97427225 | -2.69909024 | 2.47160268  |  |  |  |  |
| 1         | 1.05002773  | -0.61489022 | -2.38289714 | 1  | -0.22947228 | -3.05059004 | 1.75500286  |  |  |  |  |
| 1         | 1.20802772  | -1.93279028 | -3.56089735 | 1  | -0.76527226 | -1.67189026 | 2.76710272  |  |  |  |  |
| 1         | 2.37132788  | -0.59329027 | -3.54749727 | 1  | -0.99397230 | -3.36129022 | 3.33700275  |  |  |  |  |
| 6         | 1.84472764  | -3.07219005 | -1.14809716 | 8  | -1.23447227 | 1.29740977  | -1.30989718 |  |  |  |  |
| 1         | 1.10632765  | -2.59329009 | -0.50549716 | 15 | -2.17387223 | 2.41730976  | -1.00219715 |  |  |  |  |
| 1         | 2.50552773  | -3.67749023 | -0.51719713 | 8  | -2.56817222 | 2.69550991  | 0.49400285  |  |  |  |  |
| 1         | 1.31592774  | -3.74739003 | -1.83199716 | 8  | -1.81887233 | -0.08349024 | 1.30320287  |  |  |  |  |
| 6         | 3.65212798  | -2.83289003 | -2.81189728 | 6  | -3.36147213 | 1.78760970  | 1.33310282  |  |  |  |  |
| 1         | 4.31552744  | -3.46729016 | -2.21429729 | 6  | -2.47447228 | 0.82770973  | 2.10920286  |  |  |  |  |
| 1         | 4.27032757  | -2.18389010 | -3.44129729 | 1  | -4.06287241 | 1.24480975  | 0.69690287  |  |  |  |  |
| 1         | 3.08582783  | -3.49229002 | -3.47989726 | 1  | -3.91117215 | 2.45500994  | 2.00170279  |  |  |  |  |
| 6         | 3.57382774  | 2.43960977  | 2.62310266  | 1  | -1.76767230 | 1.42110980  | 2.71360278  |  |  |  |  |
| 1         | 4.20922756  | 3.08850980  | 2.01130271  | 1  | -3.14887214 | 0.32020974  | 2.82270265  |  |  |  |  |
| 1         | 4.22012758  | 1.82330978  | 3.25710273  | 8  | -3.58397222 | 2.25010991  | -1.73679709 |  |  |  |  |
| 1         | 2.98872781  | 3.08820987  | 3.28560281  | 6  | -3.63007212 | 1.68810976  | -3.06689715 |  |  |  |  |
| 6         | 1.75452769  | 0.77990973  | 2.76230264  | 1  | -3.20187211 | 2.38930988  | -3.78739715 |  |  |  |  |
| 1         | 1.01782775  | 0.16180976  | 2.24810266  | 1  | -3.08767223 | 0.74170977  | -3.09869719 |  |  |  |  |
| 1         | 1.22522771  | 1.45250976  | 3.44960284  | 1  | 6.56072760  | -0.12759024 | -0.11899716 |  |  |  |  |
| 1         | 2.38882780  | 0.11770976  | 3.36220264  | 1  | -4.68467236 | 1.52890980  | -3.28849721 |  |  |  |  |



## I-2\_PP

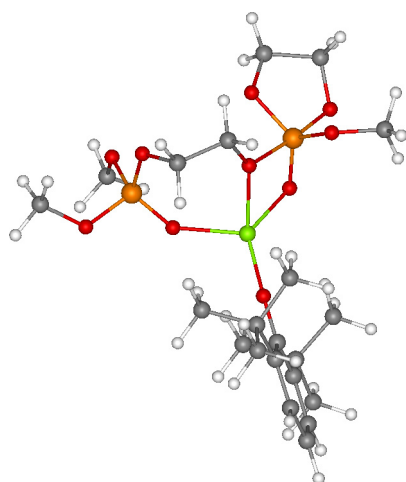

|                                              |                             |
|----------------------------------------------|-----------------------------|
| Zero-point vibrational energy                | 1568556.2 (Joules/Mol)      |
|                                              | 374.89393 (Kcal/Mol)        |
| Zero-point correction=                       | 0.597432 (Hartree/Particle) |
| Thermal correction to Energy=                | 0.637567                    |
| Thermal correction to Enthalpy=              | 0.638511                    |
| Thermal correction to Gibbs Free Energy=     | 0.521551                    |
| Sum of electronic and zero-point Energies=   | -2457.215133                |
| Sum of electronic and thermal Energies=      | -2457.174997                |
| Sum of electronic and thermal Enthalpies=    | -2457.174053                |
| Sum of electronic and thermal Free Energies= | -2457.291014                |

| cartesian |             |             |             |    |             |             |             |  |  |  |  |
|-----------|-------------|-------------|-------------|----|-------------|-------------|-------------|--|--|--|--|
| 12        | -0.47606266 | -0.23479718 | -0.38737077 | 6  | 1.81143737  | -2.51239705 | -2.02967072 |  |  |  |  |
| 8         | -1.57166266 | 3.96430278  | -0.85387081 | 1  | 2.43263745  | -3.32379723 | -1.63487077 |  |  |  |  |
| 8         | 1.34773731  | -0.14809719 | -0.10777077 | 1  | 1.27093732  | -2.89569712 | -2.90347075 |  |  |  |  |
| 6         | -2.33476257 | 5.14460278  | -0.53717077 | 1  | 1.07743740  | -2.26639724 | -1.26197076 |  |  |  |  |
| 1         | -1.65846264 | 5.98560238  | -0.68187076 | 1  | -3.19396257 | 5.23730278  | -1.20627069 |  |  |  |  |
| 1         | -2.67326260 | 5.11390257  | 0.50102919  | 8  | -1.57836270 | -1.81929719 | -0.78307080 |  |  |  |  |
| 6         | 2.67413735  | -0.19149718 | -0.07857077 | 15 | -2.66296268 | -1.92169714 | 0.29882926  |  |  |  |  |
| 6         | 3.37373734  | 0.32940280  | 1.05532932  | 8  | -3.39906263 | -3.32069707 | -0.31647074 |  |  |  |  |
| 6         | 4.76963758  | 0.25970283  | 1.07052922  | 8  | -4.10376263 | -1.11669719 | 0.27312922  |  |  |  |  |
| 1         | 5.32083750  | 0.64420283  | 1.92242932  | 6  | -4.78666258 | -3.33379722 | -0.06447077 |  |  |  |  |
| 6         | 5.49023724  | -0.29149717 | 0.01622923  | 6  | -5.20756245 | -1.87939715 | -0.22137077 |  |  |  |  |
| 6         | 4.80353737  | -0.78299713 | -1.08907068 | 1  | -5.00706244 | -3.69749713 | 0.95092922  |  |  |  |  |
| 1         | 5.38213730  | -1.20449710 | -1.90447068 | 1  | -5.27376270 | -3.99249721 | -0.78797078 |  |  |  |  |
| 6         | 3.40833735  | -0.74899715 | -1.17277074 | 1  | -5.36786270 | -1.61799717 | -1.27257073 |  |  |  |  |
| 6         | 2.61933732  | 0.97030282  | 2.23452926  | 1  | -6.09146261 | -1.61339712 | 0.36322922  |  |  |  |  |
| 6         | 2.69663739  | -1.31049716 | -2.41767073 | 8  | -2.28846264 | -2.54669714 | 1.75832927  |  |  |  |  |
| 6         | 1.67213726  | -0.05039717 | 2.89742923  | 6  | -2.06786251 | -3.95279717 | 1.94012928  |  |  |  |  |

|   |            |             |             |    |             |             |             |
|---|------------|-------------|-------------|----|-------------|-------------|-------------|
| 1 | 0.94883740 | -0.45749718 | 2.19002938  | 1  | -3.00696254 | -4.51109743 | 1.92112923  |
| 1 | 1.12673736 | 0.41680282  | 3.72822928  | 1  | -1.39666259 | -4.34999752 | 1.17602932  |
| 1 | 2.24403739 | -0.89069718 | 3.30572939  | 1  | -1.60306263 | -4.04949760 | 2.92282939  |
| 6 | 1.83453727 | 2.20370293  | 1.74262929  | 8  | -1.17306256 | 1.52170289  | -1.10807073 |
| 1 | 1.15783739 | 1.94630289  | 0.92522919  | 15 | -2.22626257 | 2.51640296  | -0.74887079 |
| 1 | 2.52183723 | 2.97060275  | 1.36902928  | 8  | -2.91696262 | 2.39860296  | 0.66722924  |
| 1 | 1.25713730 | 2.64590287  | 2.56632924  | 8  | -1.99426270 | -0.32629719 | 0.96792918  |
| 6 | 3.56783724 | 1.46570289  | 3.34052920  | 6  | -2.22866249 | 1.88070285  | 1.84442925  |
| 1 | 4.26293755 | 2.23160291  | 2.98052931  | 6  | -2.53346276 | 0.41120282  | 2.04002929  |
| 1 | 4.15163755 | 0.65010285  | 3.78002930  | 1  | -2.61276269 | 2.46820283  | 2.68122935  |
| 1 | 2.97723746 | 1.91480279  | 4.14752913  | 1  | -1.15336263 | 2.05930281  | 1.75622928  |
| 6 | 3.68533754 | -1.82619715 | -3.47867084 | 1  | -2.09126282 | 0.09190283  | 2.99382925  |
| 1 | 4.29543734 | -2.65649724 | -3.10767078 | 1  | -3.61646271 | 0.26670283  | 2.08802938  |
| 1 | 4.35583735 | -1.03839719 | -3.83827066 | 8  | -3.51036263 | 2.50840282  | -1.68177068 |
| 1 | 3.12283731 | -2.19779706 | -4.34277105 | 6  | -3.34076262 | 2.32500291  | -3.10577083 |
| 6 | 1.86713743 | -0.20729718 | -3.10837078 | 1  | -2.85966253 | 1.36620283  | -3.30537081 |
| 1 | 1.17833734 | 0.28830281  | -2.42187071 | 1  | -2.74936271 | 3.13920283  | -3.53197074 |
| 1 | 1.29153740 | -0.62359715 | -3.94447064 | 1  | 6.57613754  | -0.33439717 | 0.05392923  |
| 1 | 2.52743745 | 0.57020283  | -3.50827074 | 1  | -4.34516239 | 2.33640289  | -3.52577066 |

## TS-24\_PP

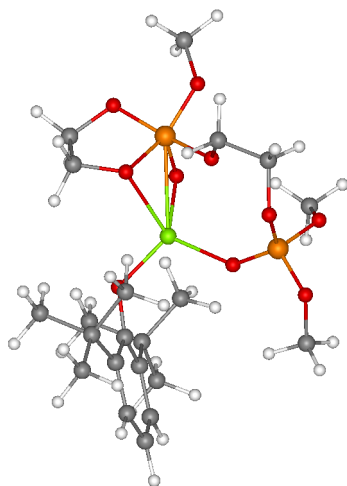

|                                            |                             |
|--------------------------------------------|-----------------------------|
| Zero-point vibrational energy              | 1569309.1 (Joules/Mol)      |
|                                            | 375.07388 (Kcal/Mol)        |
| Zero-point correction=                     | 0.597718 (Hartree/Particle) |
| Thermal correction to Energy=              | 0.636766                    |
| Thermal correction to Enthalpy=            | 0.637710                    |
| Thermal correction to Gibbs Free Energy=   | 0.524904                    |
| Sum of electronic and zero-point Energies= | -2457.202690                |
| Sum of electronic and thermal Energies=    | -2457.163642                |
| Sum of electronic and thermal Enthalpies=  | -2457.162698                |

Sum of electronic and thermal Free Energies=

-2457.275504

cartesian

|    |             |             |             |    |             |             |             |
|----|-------------|-------------|-------------|----|-------------|-------------|-------------|
| 12 | -0.69835955 | -0.22166945 | 0.20521393  | 1  | 3.10524035  | -2.19056964 | -2.88118625 |
| 8  | -2.25265956 | 3.34293056  | 1.38901401  | 1  | 1.66334033  | -1.88716948 | -3.86748624 |
| 8  | 0.97394043  | -1.03766942 | -0.14218606 | 1  | 1.50864053  | -2.18006945 | -2.11758614 |
| 6  | -2.47685957 | 2.42083049  | 2.48761392  | 1  | -2.80295968 | 1.45003057  | 2.11401391  |
| 1  | -1.56295943 | 2.31483054  | 3.07451391  | 8  | -2.23395944 | -1.00926936 | 1.27501392  |
| 6  | 2.19234037  | -0.49366945 | -0.04688606 | 15 | -3.21295953 | -1.07616937 | 0.08971395  |
| 6  | 2.86104035  | -0.45216948 | 1.21611392  | 8  | -3.58445954 | -2.69436955 | -0.12918606 |
| 6  | 4.07714081  | 0.23343053  | 1.30341399  | 8  | -2.05855966 | -1.24076939 | -1.25578606 |
| 1  | 4.59104061  | 0.30513054  | 2.25591397  | 6  | -2.47995949 | -3.45106959 | -0.59728611 |
| 6  | 4.66724062  | 0.82983053  | 0.19351393  | 6  | -1.85265946 | -2.58706951 | -1.68678606 |
| 6  | 4.05984068  | 0.69293052  | -1.05078602 | 1  | -2.85575962 | -4.40176916 | -0.98098606 |
| 1  | 4.56074047  | 1.11843061  | -1.91408598 | 1  | -1.77975965 | -3.63766956 | 0.22461393  |
| 6  | 2.84274030  | 0.02283055  | -1.21168602 | 1  | -0.78165954 | -2.76376963 | -1.79908597 |
| 6  | 2.29874039  | -1.18836939 | 2.44871378  | 1  | -2.35455942 | -2.72276950 | -2.65058613 |
| 6  | 2.26334047  | -0.19376947 | -2.62368608 | 8  | -4.78305960 | -0.74036950 | 0.38671395  |
| 6  | 2.18814039  | -2.69546962 | 2.13821387  | 6  | -5.75085926 | -1.69966936 | 0.83411390  |
| 1  | 1.55914044  | -2.86656952 | 1.26231396  | 1  | -6.01995945 | -2.38836956 | 0.03151394  |
| 1  | 1.75314045  | -3.23166943 | 2.99121380  | 1  | -5.37945938 | -2.26636958 | 1.69041395  |
| 1  | 3.17824030  | -3.12036943 | 1.94111395  | 1  | -6.62275934 | -1.11276937 | 1.13041401  |
| 6  | 0.91294044  | -0.65226948 | 2.87511396  | 8  | -0.48225954 | 1.74703062  | 0.41721395  |
| 1  | 0.10264045  | -1.10756946 | 2.30101395  | 15 | -1.26775956 | 3.00493050  | 0.18891394  |
| 1  | 0.86014050  | 0.43893054  | 2.78961396  | 8  | -2.11575961 | 3.12113047  | -1.13998604 |
| 1  | 0.70684046  | -0.91006953 | 3.92081380  | 8  | -3.03755951 | 0.60613054  | -0.30018604 |
| 6  | 3.22134042  | -1.04326940 | 3.67271376  | 6  | -3.49725962 | 2.70243049  | -1.26288605 |
| 1  | 3.30294037  | -0.00436945 | 4.01211405  | 6  | -3.61085963 | 1.20613062  | -1.44578600 |
| 1  | 4.22964048  | -1.42216945 | 3.47741389  | 1  | -3.87425971 | 3.23293042  | -2.13908625 |
| 1  | 2.81104040  | -1.62716937 | 4.50411367  | 1  | -4.04555941 | 3.02843046  | -0.37558606 |
| 6  | 3.18444037  | 0.36993054  | -3.72038603 | 1  | -4.67555952 | 0.95213050  | -1.53008604 |
| 1  | 4.18404055  | -0.07546945 | -3.68998623 | 1  | -3.08855963 | 0.88033050  | -2.35358620 |
| 1  | 3.28994036  | 1.45873058  | -3.65688610 | 8  | -0.32305953 | 4.25733089  | -0.00768606 |
| 1  | 2.75634050  | 0.14193054  | -4.70288610 | 6  | 0.92944044  | 4.33853054  | 0.71091390  |
| 6  | 0.89734048  | 0.49683052  | -2.80488610 | 1  | 1.48804045  | 3.40653038  | 0.61351395  |
| 1  | 0.11614048  | 0.00313054  | -2.22478604 | 1  | 0.74034041  | 4.56723070  | 1.76261401  |
| 1  | 0.58714044  | 0.45553052  | -3.85648608 | 1  | 5.60934067  | 1.36433053  | 0.29101396  |
| 1  | 0.94434041  | 1.55023062  | -2.51048613 | 1  | -3.25675964 | 2.88123035  | 3.09311390  |
| 6  | 2.12214041  | -1.70716941 | -2.88658619 | 1  | 1.47884035  | 5.15773058  | 0.24991393  |

# I-4\_PP

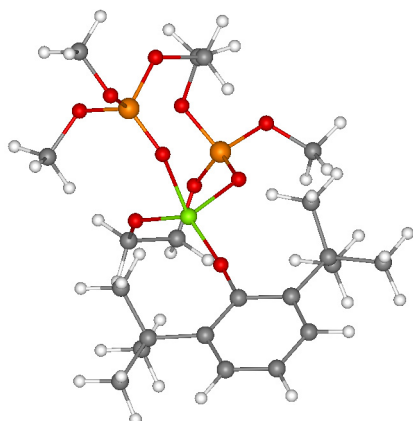

|                                              |                             |
|----------------------------------------------|-----------------------------|
| Zero-point vibrational energy                | 1566502.0 (Joules/Mol)      |
|                                              | 374.40297 (Kcal/Mol)        |
| Zero-point correction=                       | 0.596649 (Hartree/Particle) |
| Thermal correction to Energy=                | 0.637223                    |
| Thermal correction to Enthalpy=              | 0.638167                    |
| Thermal correction to Gibbs Free Energy=     | 0.521953                    |
| Sum of electronic and zero-point Energies=   | -2457.222104                |
| Sum of electronic and thermal Energies=      | -2457.181530                |
| Sum of electronic and thermal Enthalpies=    | -2457.180586                |
| Sum of electronic and thermal Free Energies= | -2457.296800                |

| cartesian |             |             |             |                                       |
|-----------|-------------|-------------|-------------|---------------------------------------|
| 12        | 0.49715561  | -0.04940699 | -0.48172364 | 1 -1.86334443 -2.08550715 -3.29362369 |
| 8         | 2.33065557  | -3.19190717 | 2.15207624  | 1 -1.48534441 -0.61670697 -2.37682366 |
| 8         | -1.31954432 | 0.15189300  | -0.13852362 | 1 3.90665579 -4.53280687 1.83787644   |
| 6         | 3.34785557  | -4.07690668 | 2.65877628  | 8 1.56215572 1.69349301 -0.17762363   |
| 1         | 2.82125568  | -4.84600687 | 3.22187638  | 15 2.91635561 1.90569305 -0.78972358  |
| 1         | 4.02645540  | -3.53060699 | 3.31777620  | 8 2.98425579 1.93989301 -2.35932374   |
| 6         | -2.61174440 | 0.10679300  | 0.15277638  | 8 1.48415565 -0.54320699 -2.03182364  |
| 6         | -3.17904425 | 1.07909298  | 1.03837645  | 6 1.90285563 1.49599302 -3.24522376   |
| 6         | -4.54674435 | 1.01259303  | 1.31867635  | 6 1.77715564 -0.01810699 -3.26842380  |
| 1         | -4.99704409 | 1.73969305  | 1.98657644  | 1 2.17965555 1.90519309 -4.21962357   |
| 6         | -5.36714411 | 0.03479301  | 0.76577640  | 1 0.97335565 1.96399307 -2.90572381   |
| 6         | -4.80984449 | -0.90830696 | -0.09132362 | 1 1.00155568 -0.23490700 -4.02962351  |
| 1         | -5.46354437 | -1.66440701 | -0.51352358 | 1 2.72375560 -0.42880699 -3.66572380  |
| 6         | -3.45024443 | -0.90490699 | -0.41692364 | 8 1.45885563 -1.22220695 0.87467641   |
| 6         | -2.31664443 | 2.18409300  | 1.67637634  | 15 2.69345570 -1.99880695 1.16987646  |
| 6         | -2.88564444 | -1.97700691 | -1.36742365 | 8 3.83555579 -1.18040693 1.92127645   |
| 6         | -1.69944429 | 3.07889295  | 0.58247638  | 8 4.04915571 0.87509304 -0.35482362   |
| 1         | -1.08474445 | 2.50289297  | -0.10892362 | 6 3.83035564 0.25799301 2.03117633    |

|   |             |             |             |   |             |             |             |
|---|-------------|-------------|-------------|---|-------------|-------------|-------------|
| 1 | -1.07444429 | 3.85909295  | 1.03687644  | 6 | 4.66045570  | 0.91689301  | 0.95017642  |
| 1 | -2.49014425 | 3.57369280  | 0.00707638  | 1 | 4.28945541  | 0.47209302  | 2.99967623  |
| 6 | -1.21474433 | 1.56219304  | 2.55887628  | 1 | 2.80305576  | 0.63029301  | 2.03917623  |
| 1 | -0.58704442 | 0.87069303  | 1.99617636  | 1 | 4.85945559  | 1.95489299  | 1.23227644  |
| 1 | -1.66284442 | 1.00479305  | 3.38907623  | 1 | 5.61035585  | 0.39279300  | 0.83387637  |
| 1 | -0.57514435 | 2.34619284  | 2.98477626  | 8 | 3.48845577  | -2.61780715 | -0.04692363 |
| 6 | -3.13414431 | 3.11229300  | 2.59197617  | 6 | 2.77915573  | -3.27150702 | -1.13942361 |
| 1 | -3.59164429 | 2.57299280  | 3.42827630  | 1 | 2.20415568  | -2.51620698 | -1.68382359 |
| 1 | -3.92494440 | 3.64039302  | 2.04837632  | 1 | 2.13885570  | -4.06760693 | -0.75002360 |
| 1 | -2.46934438 | 3.87209296  | 3.01917624  | 1 | -6.42854452 | 0.00759301  | 1.00087643  |
| 6 | -3.96874428 | -2.95020700 | -1.86692357 | 8 | 3.55725574  | 3.28839302  | -0.31132364 |
| 1 | -4.75004435 | -2.44090700 | -2.44122362 | 6 | 2.77075577  | 4.49509335  | -0.39562362 |
| 1 | -4.44514418 | -3.49820709 | -1.04722357 | 1 | 3.34325576  | 5.26469326  | 0.12067638  |
| 1 | -3.50764441 | -3.69170713 | -2.52972364 | 1 | 2.63475561  | 4.77789307  | -1.44232357 |
| 6 | -1.83624434 | -2.83900714 | -0.63572359 | 1 | 1.80365562  | 4.35429335  | 0.09107638  |
| 1 | -1.04534435 | -2.23540711 | -0.18822363 | 1 | 3.55915570  | -3.70060706 | -1.76732361 |
| 1 | -1.37754440 | -3.55750704 | -1.32702363 | 6 | -2.27954435 | -1.32120693 | -2.62522364 |
| 1 | -2.30844426 | -3.40410709 | 0.17557637  | 1 | -3.05314422 | -0.77450699 | -3.17592382 |

#### TS-45\_PP

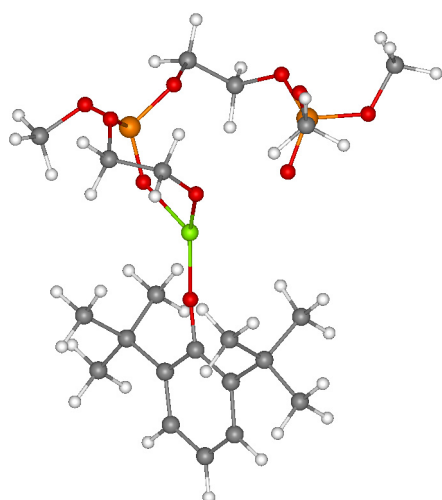

|                                            |                             |
|--------------------------------------------|-----------------------------|
| Zero-point vibrational energy              | 1563528.3 (Joules/Mol)      |
|                                            | 373.69222 (Kcal/Mol)        |
| Zero-point correction=                     | 0.595516 (Hartree/Particle) |
| Thermal correction to Energy=              | 0.635976                    |
| Thermal correction to Enthalpy=            | 0.636920                    |
| Thermal correction to Gibbs Free Energy=   | 0.518929                    |
| Sum of electronic and zero-point Energies= | -2457.197842                |
| Sum of electronic and thermal Energies=    | -2457.157383                |
| Sum of electronic and thermal Enthalpies=  | -2457.156439                |

Sum of electronic and thermal Free Energies=

-2457.274430

cartesian

|    |             |             |             |    |             |             |             |
|----|-------------|-------------|-------------|----|-------------|-------------|-------------|
| 12 | 0.15823469  | 0.15365970  | -0.73387504 | 6  | -2.25516534 | -1.95184028 | -2.38117504 |
| 8  | 3.91033459  | -3.14894032 | 1.89312506  | 1  | -3.14666533 | -1.67634022 | -2.95517492 |
| 8  | -1.56066525 | 0.01215971  | -0.10997502 | 1  | -1.68906534 | -2.68834043 | -2.96387506 |
| 6  | 5.27503490  | -3.58674049 | 2.00042486  | 1  | -1.63856518 | -1.05684030 | -2.28687501 |
| 1  | 5.24343491  | -4.55734015 | 2.49472499  | 1  | 5.72813463  | -3.68854046 | 1.01092505  |
| 1  | 5.85233498  | -2.88194036 | 2.60402513  | 8  | 1.16733468  | 1.81065977  | -0.17477500 |
| 6  | -2.82076550 | -0.26074028 | 0.22072499  | 15 | 2.50983453  | 2.28455973  | -0.65977502 |
| 6  | -3.56826520 | 0.68765974  | 0.98602498  | 8  | 2.69293451  | 2.32705951  | -2.22047496 |
| 6  | -4.89256525 | 0.38255972  | 1.31432509  | 8  | 1.23543465  | -0.29904029 | -2.19867492 |
| 1  | -5.48186541 | 1.08615971  | 1.89282501  | 6  | 1.72933471  | 1.84995973  | -3.21497488 |
| 6  | -5.49306536 | -0.80884027 | 0.92222500  | 6  | 1.70313466  | 0.33405972  | -3.32807493 |
| 6  | -4.75656509 | -1.72644031 | 0.18142499  | 1  | 2.06413460  | 2.31895971  | -4.14307499 |
| 1  | -5.24046516 | -2.65094042 | -0.11467502 | 1  | 0.74083471  | 2.24335957  | -2.95337486 |
| 6  | -3.42846537 | -1.48914027 | -0.18627501 | 1  | 1.08063471  | 0.12425971  | -4.22007513 |
| 6  | -2.94686532 | 2.01795959  | 1.45222509  | 1  | 2.72543454  | 0.00095971  | -3.58277488 |
| 6  | -2.66296530 | -2.53834033 | -1.01397491 | 8  | 2.08143473  | -1.53884029 | 1.16042507  |
| 6  | -2.51926541 | 2.86815953  | 0.23842499  | 15 | 3.53173470  | -1.81384027 | 1.10422504  |
| 1  | -1.78706539 | 2.34635973  | -0.37877503 | 8  | 4.47453451  | -0.69824028 | 1.77962506  |
| 1  | -2.07886553 | 3.81635952  | 0.57332498  | 8  | 3.77593470  | 1.47835970  | -0.16527501 |
| 1  | -3.38636541 | 3.10305953  | -0.38887504 | 6  | 3.95183468  | 0.59445965  | 2.11972499  |
| 6  | -1.74346530 | 1.75085974  | 2.37882495  | 6  | 4.39443493  | 1.64825976  | 1.13102508  |
| 1  | -0.97526526 | 1.15695977  | 1.88322508  | 1  | 4.37153482  | 0.84545970  | 3.09862494  |
| 1  | -2.06586552 | 1.20605969  | 3.27282500  | 1  | 2.86273456  | 0.55295968  | 2.20452499  |
| 1  | -1.29316533 | 2.69735956  | 2.70512509  | 1  | 4.17293453  | 2.64375973  | 1.52492499  |
| 6  | -3.93816543 | 2.87665963  | 2.25782514  | 1  | 5.46683502  | 1.56925976  | 0.94582498  |
| 1  | -4.27556515 | 2.37305951  | 3.16982508  | 8  | 4.20883465  | -1.95244026 | -0.33287501 |
| 1  | -4.82006502 | 3.15575957  | 1.67132509  | 6  | 3.48443460  | -2.62624049 | -1.39397502 |
| 1  | -3.44346547 | 3.80555964  | 2.56412506  | 1  | 2.63533449  | -2.01284027 | -1.70707500 |
| 6  | -3.51846528 | -3.78144050 | -1.32157493 | 1  | 3.15333462  | -3.61584044 | -1.06657493 |
| 1  | -4.40466499 | -3.53994036 | -1.91807497 | 1  | -6.52476501 | -1.02054024 | 1.19262505  |
| 1  | -3.84416556 | -4.29614019 | -0.41167504 | 8  | 2.82123470  | 3.75255966  | -0.12177501 |
| 1  | -2.92046547 | -4.49344015 | -1.90177500 | 6  | 1.80583465  | 4.77515984  | -0.20447502 |
| 6  | -1.43276525 | -3.05024028 | -0.23687501 | 1  | 2.18753457  | 5.62366009  | 0.36162499  |
| 1  | -0.77086532 | -2.24684048 | 0.09012499  | 1  | 1.65563476  | 5.06655979  | -1.24697495 |
| 1  | -0.84986532 | -3.74604034 | -0.85227501 | 1  | 0.87133467  | 4.41905975  | 0.23272499  |
| 1  | -1.74916518 | -3.58264041 | 0.66642499  | 1  | 4.19973469  | -2.73384047 | -2.20947504 |

# I-5\_PP

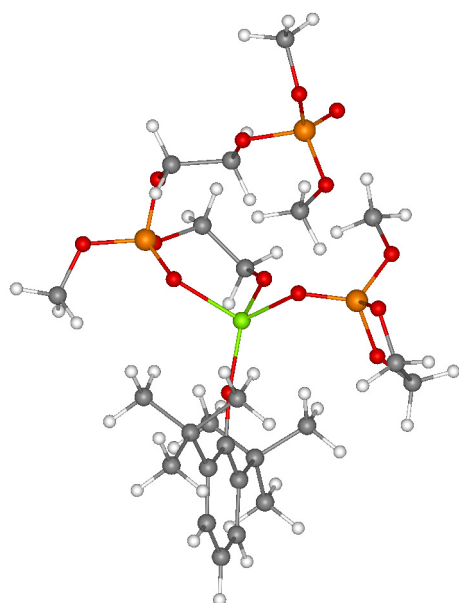

|                                              |                             |
|----------------------------------------------|-----------------------------|
| Zero-point vibrational energy                | 1870434.4 (Joules/Mol)      |
|                                              | 447.04454 (Kcal/Mol)        |
| Zero-point correction=                       | 0.712411 (Hartree/Particle) |
| Thermal correction to Energy=                | 0.764194                    |
| Thermal correction to Enthalpy=              | 0.765139                    |
| Thermal correction to Gibbs Free Energy=     | 0.618509                    |
| Sum of electronic and zero-point Energies=   | -3217.786351                |
| Sum of electronic and thermal Energies=      | -3217.734568                |
| Sum of electronic and thermal Enthalpies=    | -3217.733624                |
| Sum of electronic and thermal Free Energies= | -3217.880253                |

|    |             |             |             | cartesian |             |             |             |  |
|----|-------------|-------------|-------------|-----------|-------------|-------------|-------------|--|
| 12 | 0.23214152  | -0.61861616 | 0.58668512  | 6         | -3.54245830 | -2.53571630 | -0.89501488 |  |
| 8  | -4.43975830 | 1.95198393  | -0.44291493 | 6         | -3.91905832 | -1.34491611 | -0.03301492 |  |
| 8  | 1.88374150  | -0.10371612 | -0.14261490 | 1         | -3.01985836 | -2.21761632 | -1.79991484 |  |
| 6  | -4.06435871 | 2.26268387  | -1.79871488 | 1         | -4.42685843 | -3.11001611 | -1.17591488 |  |
| 1  | -3.67575836 | 1.37468398  | -2.30261493 | 1         | -3.03305840 | -0.75201613 | 0.21008509  |  |
| 1  | -4.92495823 | 2.65948391  | -2.34171510 | 1         | -4.39445829 | -1.67881608 | 0.89298511  |  |
| 6  | 3.08934164  | 0.32098389  | -0.48951492 | 8         | -6.68625832 | 1.09328389  | -1.06241488 |  |
| 6  | 4.18484163  | 0.25448388  | 0.43378508  | 6         | -7.88265848 | 0.29948390  | -0.95531487 |  |
| 6  | 5.42814159  | 0.75468385  | 0.03578509  | 1         | -8.24885845 | 0.30098388  | 0.07368509  |  |
| 1  | 6.26714182  | 0.72048384  | 0.72278512  | 1         | -7.68875837 | -0.72331613 | -1.28841484 |  |
| 6  | 5.63984156  | 1.29678392  | -1.22741485 | 1         | 6.61864138  | 1.67878389  | -1.50761485 |  |
| 6  | 4.58484173  | 1.32368386  | -2.13301492 | 8         | -0.58805847 | -2.04861617 | -0.61641490 |  |
| 1  | 4.77184153  | 1.72838390  | -3.12221503 | 15        | -1.13415849 | -3.39291620 | -0.23101491 |  |
| 6  | 3.31274152  | 0.84418386  | -1.80641484 | 8         | -0.61905849 | -4.05371618 | 1.09788513  |  |

---

|    |             |             |             |    |             |             |             |
|----|-------------|-------------|-------------|----|-------------|-------------|-------------|
| 6  | 4.02704144  | -0.36971611 | 1.83288515  | 8  | -0.38985848 | -1.32831609 | 2.23558497  |
| 6  | 2.19304156  | 0.87258387  | -2.86361504 | 6  | -1.00395846 | -3.64931631 | 2.45698500  |
| 6  | 3.02764153  | 0.43918389  | 2.68248510  | 6  | -0.17425850 | -2.47881627 | 2.95978498  |
| 1  | 2.05364156  | 0.53328383  | 2.20328498  | 1  | -2.06935835 | -3.40431619 | 2.44498491  |
| 1  | 2.87864161  | -0.03441612 | 3.66038489  | 1  | -0.84465849 | -4.55181599 | 3.05238509  |
| 1  | 3.41024160  | 1.45188391  | 2.85218501  | 1  | 0.88414145  | -2.79591632 | 2.97458506  |
| 6  | 3.58044147  | -1.84071612 | 1.70718515  | 1  | -0.46675849 | -2.35951614 | 4.02278519  |
| 1  | 2.65134168  | -1.93661606 | 1.14328516  | 8  | -0.82315850 | -4.48401642 | -1.34041488 |
| 1  | 4.34604168  | -2.42571616 | 1.18528509  | 6  | 0.50904143  | -4.59411621 | -1.88991487 |
| 1  | 3.43304157  | -2.28451610 | 2.69938493  | 1  | 1.18784153  | -5.00581598 | -1.13971484 |
| 6  | 5.34834146  | -0.38891611 | 2.62318492  | 1  | 0.86194146  | -3.61971617 | -2.23191500 |
| 1  | 6.12784147  | -0.96681613 | 2.11528492  | 1  | 0.42674151  | -5.28051615 | -2.73141503 |
| 1  | 5.73434162  | 0.61848384  | 2.81308508  | 8  | -1.04545844 | 0.98138386  | 0.55628508  |
| 1  | 5.17564154  | -0.85851616 | 3.59818506  | 15 | -1.16165853 | 2.26738381  | 1.30458510  |
| 6  | 2.67324162  | 1.42388391  | -4.21761465 | 8  | 0.25034150  | 2.76828384  | 1.88808513  |
| 1  | 3.02184153  | 2.46008372  | -4.14681482 | 8  | -1.52665854 | 3.57138371  | 0.44338506  |
| 1  | 3.47854161  | 0.81968385  | -4.64851475 | 6  | 0.44004151  | 4.17068386  | 1.61938512  |
| 1  | 1.83854139  | 1.40968394  | -4.92801476 | 6  | -0.38095850 | 4.45028400  | 0.35938507  |
| 6  | 1.67364156  | -0.55511612 | -3.12871504 | 1  | 0.08244148  | 4.74488401  | 2.47908497  |
| 1  | 1.29124153  | -1.01651609 | -2.21811509 | 1  | 1.50694144  | 4.33848381  | 1.47298515  |
| 1  | 0.86904144  | -0.53831613 | -3.87531495 | 1  | 0.17454150  | 4.21068382  | -0.55011487 |
| 1  | 2.48274159  | -1.18261611 | -3.51971507 | 1  | -0.75505853 | 5.47348356  | 0.31478509  |
| 6  | 1.03934145  | 1.78408396  | -2.40141511 | 8  | -2.23275852 | 2.26208377  | 2.44798493  |
| 1  | 1.39744151  | 2.81648374  | -2.30311513 | 6  | -2.70465851 | 1.03978395  | 3.09898496  |
| 1  | 0.22434148  | 1.78018391  | -3.13681507 | 1  | -2.05835843 | 0.19148389  | 2.85468507  |
| 1  | 0.63774145  | 1.46308386  | -1.44021487 | 1  | -3.73075843 | 0.87748384  | 2.76868510  |
| 8  | -5.70735836 | 0.62798387  | 1.34078515  | 1  | -2.67085838 | 1.24558389  | 4.16898537  |
| 15 | -5.44915819 | 0.77268386  | -0.10381491 | 1  | -3.28215837 | 3.01628375  | -1.72421491 |
| 8  | -2.71975851 | -3.42551613 | -0.10841491 | 1  | -8.61545849 | 0.76738387  | -1.61191487 |
| 8  | -4.85075855 | -0.55911613 | -0.80291492 |    |             |             |             |

---



## S1.5. CP sequence, mononuclear mechanism

### I-1\_CP

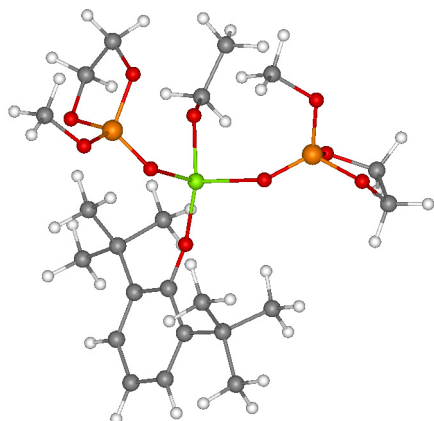

|                                              |                             |
|----------------------------------------------|-----------------------------|
| Zero-point vibrational energy                | 1638160.6 (Joules/Mol)      |
|                                              | 391.52977 (Kcal/Mol)        |
| Zero-point correction=                       | 0.623942 (Hartree/Particle) |
| Thermal correction to Energy=                | 0.666703                    |
| Thermal correction to Enthalpy=              | 0.667647                    |
| Thermal correction to Gibbs Free Energy=     | 0.543208                    |
| Sum of electronic and zero-point Energies=   | -2496.480479                |
| Sum of electronic and thermal Energies=      | -2496.437719                |
| Sum of electronic and thermal Enthalpies=    | -2496.436775                |
| Sum of electronic and thermal Free Energies= | -2496.561213                |

|    |             |             |             | cartesian |             |             |             |
|----|-------------|-------------|-------------|-----------|-------------|-------------|-------------|
| 12 | 0.61740255  | 0.17141742  | 0.16157193  | 1         | -1.30479741 | 1.32141745  | 3.73557210  |
| 8  | 1.97870255  | 0.01081741  | -1.17392814 | 1         | -0.86489737 | 0.18811741  | 2.44897199  |
| 8  | -1.24289739 | -0.05588260 | 0.07257193  | 6         | 3.28400254  | 0.73591739  | -3.09402800 |
| 6  | 1.97560263  | 0.14851740  | -2.56452799 | 8         | 1.49490261  | -0.99968261 | 1.59577191  |
| 1  | 1.14980257  | 0.79141742  | -2.91522789 | 15        | 2.53400254  | -2.05778265 | 1.54237187  |
| 1  | 1.81180263  | -0.82768261 | -3.06222796 | 8         | 4.00910282  | -1.57008255 | 1.12457192  |
| 6  | -2.49749756 | -0.47388262 | 0.17457193  | 8         | 2.36990237  | -3.22068262 | 0.45137194  |
| 6  | -3.02579761 | -1.42018259 | -0.76382810 | 6         | 4.43480253  | -2.19108272 | -0.11222808 |
| 6  | -4.34529734 | -1.85518253 | -0.60912806 | 6         | 3.20340252  | -2.90098262 | -0.69282806 |
| 1  | -4.75969744 | -2.57748270 | -1.30472803 | 1         | 5.24590254  | -2.88268256 | 0.13177192  |
| 6  | -5.16269732 | -1.39028251 | 0.41517192  | 1         | 4.79240227  | -1.40458250 | -0.77622807 |
| 6  | -4.65569735 | -0.44968259 | 1.30527186  | 1         | 2.64110255  | -2.23288274 | -1.34672809 |
| 1  | -5.30979776 | -0.08498260 | 2.09047198  | 1         | 3.44850254  | -3.84148264 | -1.18622804 |
| 6  | -3.34659743 | 0.03191741  | 1.21347189  | 8         | 2.61410236  | -2.75338268 | 2.95797205  |
| 6  | -2.18149757 | -1.95198262 | -1.93662798 | 6         | 3.54550242  | -3.82268262 | 3.21027207  |

|   |             |             |             |    |             |             |             |
|---|-------------|-------------|-------------|----|-------------|-------------|-------------|
| 6 | -2.85389757 | 1.09531748  | 2.21207190  | 1  | 3.34680247  | -4.66408253 | 2.54297209  |
| 6 | -0.96769738 | -2.74448276 | -1.41382813 | 1  | 4.57180262  | -3.46718264 | 3.08917212  |
| 1 | -0.33879742 | -2.13978267 | -0.76012808 | 1  | 3.37930250  | -4.12248278 | 4.24377203  |
| 1 | -0.35119745 | -3.10078263 | -2.24932790 | 8  | 1.04790258  | 2.03171730  | 0.89767194  |
| 1 | -1.29819739 | -3.61648273 | -0.83902812 | 15 | 1.60740256  | 3.27651739  | 0.30687195  |
| 6 | -1.72569740 | -0.78298259 | -2.83272791 | 8  | 1.17740262  | 4.65801716  | 1.00037193  |
| 1 | -1.16219735 | -0.04118259 | -2.26632786 | 8  | 1.06320262  | 3.59051728  | -1.17422807 |
| 1 | -2.59599757 | -0.28248259 | -3.27202797 | 6  | 0.23190257  | 5.35401726  | 0.15877193  |
| 1 | -1.09559739 | -1.14838254 | -3.65332794 | 6  | 0.60440254  | 4.95481730  | -1.26962805 |
| 6 | -2.96929741 | -2.91578269 | -2.84172797 | 1  | 0.34820256  | 6.42151737  | 0.34637195  |
| 1 | -3.84809732 | -2.43918276 | -3.28882790 | 1  | -0.77799737 | 5.03231716  | 0.42517191  |
| 1 | -3.29869747 | -3.81328273 | -2.30702806 | 1  | -0.24739745 | 4.97201729  | -1.94962800 |
| 1 | -2.32319760 | -3.24528265 | -3.66382790 | 1  | 1.41660261  | 5.56841755  | -1.66952813 |
| 6 | -3.94919729 | 1.52651751  | 3.20407200  | 8  | 3.18310237  | 3.33451724  | 0.31357193  |
| 1 | -4.29589748 | 0.69521743  | 3.82727194  | 6  | 3.97180247  | 2.13351727  | 0.55597192  |
| 1 | -4.81779766 | 1.96471751  | 2.70027208  | 1  | 3.93100238  | 1.88961744  | 1.61837196  |
| 1 | -3.54259753 | 2.28911734  | 3.87847209  | 1  | 3.59490252  | 1.30451751  | -0.04792808 |
| 6 | -2.42649746 | 2.36861730  | 1.45257187  | 1  | 4.98750257  | 2.40101743  | 0.26737192  |
| 1 | -1.65039742 | 2.14671731  | 0.71997190  | 1  | 3.27290249  | 0.80491740  | -4.18892813 |
| 1 | -2.04479742 | 3.12081742  | 2.15557194  | 1  | 3.44890237  | 1.74171746  | -2.69252801 |
| 1 | -3.28709745 | 2.79721737  | 0.92557192  | 1  | 4.13880253  | 0.11251741  | -2.80412793 |
| 6 | -1.69089746 | 0.54651743  | 3.06167197  | 1  | -6.18459749 | -1.74908257 | 0.51297194  |
| 1 | -2.03389764 | -0.29438260 | 3.67447209  |    |             |             |             |

## TS-12\_CP

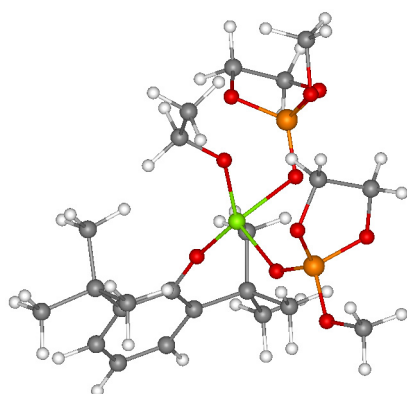

|                                            |                             |
|--------------------------------------------|-----------------------------|
| Zero-point vibrational energy              | 1639406.3 (Joules/Mol)      |
|                                            | 391.82751 (Kcal/Mol)        |
| Zero-point correction=                     | 0.624417 (Hartree/Particle) |
| Thermal correction to Energy=              | 0.665903                    |
| Thermal correction to Enthalpy=            | 0.666847                    |
| Thermal correction to Gibbs Free Energy=   | 0.547305                    |
| Sum of electronic and zero-point Energies= | -2496.473564                |

|                                              |              |
|----------------------------------------------|--------------|
| Sum of electronic and thermal Energies=      | -2496.432077 |
| Sum of electronic and thermal Enthalpies=    | -2496.431133 |
| Sum of electronic and thermal Free Energies= | -2496.550676 |

| cartesian |             |             |             |    |             |             |             |
|-----------|-------------|-------------|-------------|----|-------------|-------------|-------------|
| 12        | 0.41053650  | -0.26081076 | 0.00927469  | 1  | -0.99606347 | 0.42068923  | 3.92087483  |
| 8         | 1.70083654  | 0.20168923  | -1.33782530 | 1  | -0.92176342 | -0.48121077 | 2.39757466  |
| 8         | -1.44706345 | -0.08801077 | 0.07387469  | 1  | 1.42073655  | 1.32478929  | -3.04362535 |
| 6         | 1.65293658  | 0.29098922  | -2.73432517 | 8  | 1.01333654  | -2.01641083 | 0.84527469  |
| 1         | 0.84523654  | -0.33471078 | -3.14752531 | 15 | 2.32193661  | -2.67321086 | 1.09177470  |
| 6         | 2.96323657  | -0.13601077 | -3.39512539 | 8  | 3.31803656  | -1.86601079 | 2.06067467  |
| 6         | -2.75746346 | -0.23241076 | 0.21807469  | 8  | 3.31543660  | -2.83241081 | -0.15822530 |
| 6         | -3.53666353 | -0.83991075 | -0.81902528 | 6  | 4.49573660  | -1.42741072 | 1.34067476  |
| 6         | -4.91456366 | -0.97861075 | -0.62862527 | 6  | 4.20833635  | -1.68381071 | -0.14432532 |
| 1         | -5.52156353 | -1.43981075 | -1.40082526 | 1  | 5.34263659  | -2.01081085 | 1.71227467  |
| 6         | -5.54876328 | -0.53931075 | 0.52877468  | 1  | 4.64263630  | -0.36821079 | 1.55047476  |
| 6         | -4.78966331 | 0.06338924  | 1.52637470  | 1  | 3.69033647  | -0.84441078 | -0.61892533 |
| 1         | -5.30016327 | 0.40738922  | 2.42017484  | 1  | 5.09973669  | -1.96281075 | -0.70622528 |
| 6         | -3.40726352 | 0.23388924  | 1.40677476  | 8  | 2.07273650  | -4.11221075 | 1.68447471  |
| 6         | -2.88956356 | -1.32431078 | -2.12922525 | 6  | 3.17173648  | -4.96501112 | 2.06267476  |
| 6         | -2.61666346 | 0.91208923  | 2.54017472  | 1  | 3.79483652  | -5.18691111 | 1.19377470  |
| 6         | -1.86916351 | -2.44581079 | -1.84572530 | 1  | 3.76103663  | -4.49251080 | 2.85187483  |
| 1         | -1.11956346 | -2.14651084 | -1.11232531 | 1  | 2.71853662  | -5.88081121 | 2.43847466  |
| 1         | -1.35426342 | -2.74311066 | -2.76802516 | 8  | 1.47173655  | 1.11868930  | 1.12057471  |
| 1         | -2.37706351 | -3.32891083 | -1.44272530 | 15 | 2.18853641  | 2.15588927  | 0.32037470  |
| 6         | -2.22156358 | -0.13981077 | -2.85652518 | 8  | 2.39523649  | 3.51798916  | 1.19717467  |
| 1         | -1.47936344 | 0.35518926  | -2.22922540 | 8  | 1.42913651  | 2.86898923  | -0.91042531 |
| 1         | -2.97606349 | 0.60538924  | -3.13312531 | 6  | 1.36103654  | 4.45328903  | 0.85837471  |
| 1         | -1.73136353 | -0.47991079 | -3.77752519 | 6  | 1.14133656  | 4.25988913  | -0.64302528 |
| 6         | -3.91676331 | -1.91561079 | -3.11122537 | 1  | 1.71523654  | 5.45428896  | 1.10787475  |
| 1         | -4.67496347 | -1.18321073 | -3.40802526 | 1  | 0.46003652  | 4.22528887  | 1.43537474  |
| 1         | -4.42716360 | -2.79301071 | -2.69992518 | 1  | 0.11253650  | 4.44938898  | -0.95112526 |
| 1         | -3.39906335 | -2.23751068 | -4.02232552 | 1  | 1.82723653  | 4.86548901  | -1.24212527 |
| 6         | -3.52086353 | 1.37238920  | 3.69767475  | 8  | 3.69383645  | 1.76108921  | -0.00962530 |
| 1         | -4.03886366 | 0.53598922  | 4.17897463  | 6  | 4.52263641  | 2.66868925  | -0.75712526 |
| 1         | -4.27116346 | 2.10148931  | 3.37317467  | 1  | 4.10643625  | 2.82318926  | -1.75512528 |
| 1         | -2.90396357 | 1.85578930  | 4.46417427  | 1  | 4.62253666  | 3.61878920  | -0.22612530 |
| 6         | -1.91006351 | 2.17748928  | 2.01087475  | 1  | 5.49823666  | 2.19028926  | -0.83912528 |
| 1         | -1.26306343 | 1.94288921  | 1.16517472  | 1  | 2.90783644  | -0.02351077 | -4.48502541 |
| 1         | -1.30366349 | 2.63438916  | 2.80407476  | 1  | 3.80183649  | 0.47188926  | -3.03512526 |
| 1         | -2.65376353 | 2.91258931  | 1.68147469  | 1  | 3.18493652  | -1.18611073 | -3.17512536 |

|   |             |             |            |   |             |             |            |
|---|-------------|-------------|------------|---|-------------|-------------|------------|
| 6 | -1.59826350 | -0.07291076 | 3.14817476 | 1 | -6.62266350 | -0.66091073 | 0.64997470 |
| 1 | -2.12096357 | -0.91671073 | 3.61177468 |   |             |             |            |

## I-2\_CP

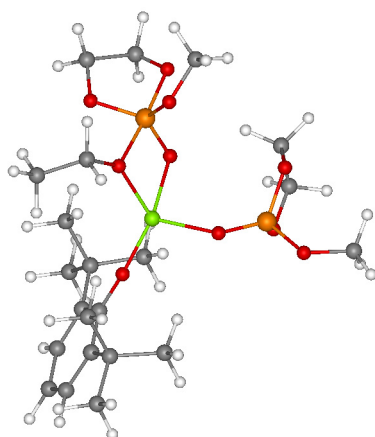

|                                              |                             |
|----------------------------------------------|-----------------------------|
| Zero-point vibrational energy                | 1643868.5 (Joules/Mol)      |
|                                              | 392.89400 (Kcal/Mol)        |
| Zero-point correction=                       | 0.626116 (Hartree/Particle) |
| Thermal correction to Energy=                | 0.667507                    |
| Thermal correction to Enthalpy=              | 0.668451                    |
| Thermal correction to Gibbs Free Energy=     | 0.549132                    |
| Sum of electronic and zero-point Energies=   | -2496.488615                |
| Sum of electronic and thermal Energies=      | -2496.447225                |
| Sum of electronic and thermal Enthalpies=    | -2496.446280                |
| Sum of electronic and thermal Free Energies= | -2496.565600                |

| cartesian |             |             |             |    |             |             |             |
|-----------|-------------|-------------|-------------|----|-------------|-------------|-------------|
| 12        | 0.40965077  | 0.16324402  | 0.40965867  | 1  | -0.26054922 | -0.64395601 | -3.51344132 |
| 8         | 1.38165081  | -1.14505601 | 1.59255862  | 1  | -0.62824929 | 0.37664402  | -2.10824132 |
| 8         | -1.41184926 | 0.10424402  | 0.11315867  | 1  | 2.22695065  | -2.21815610 | 3.13935876  |
| 6         | 1.26205075  | -1.77715588 | 2.87625861  | 8  | 1.00705075  | 2.09214401  | 0.63155866  |
| 6         | 0.16595076  | -2.82685614 | 2.87855864  | 15 | 1.86575079  | 2.98484397  | -0.18914133 |
| 1         | 1.05445075  | -0.98825592 | 3.60785866  | 8  | 1.57025075  | 2.92744398  | -1.76704133 |
| 6         | -2.68734932 | -0.06195597 | -0.21684134 | 8  | 3.44295073  | 2.70274401  | -0.24764132 |
| 6         | -3.71524906 | 0.47494403  | 0.62185866  | 6  | 2.75785089  | 2.58334398  | -2.51904130 |
| 6         | -5.04834938 | 0.27384403  | 0.25275868  | 6  | 3.77115083  | 2.04324412  | -1.50104129 |
| 1         | -5.84524918 | 0.66924405  | 0.87385869  | 1  | 3.10675073  | 3.48874402  | -3.02304125 |
| 6         | -5.39964914 | -0.42285597 | -0.89884132 | 1  | 2.47655082  | 1.83074403  | -3.25544143 |
| 6         | -4.39484930 | -0.93205601 | -1.71394134 | 1  | 3.66755080  | 0.96604401  | -1.35974133 |
| 1         | -4.68664932 | -1.46955609 | -2.61034131 | 1  | 4.79785061  | 2.31524396  | -1.74664128 |
| 6         | -3.03974915 | -0.77125597 | -1.40884137 | 8  | 1.68635082  | 4.46114397  | 0.34075868  |

|   |             |             |             |    |             |             |             |
|---|-------------|-------------|-------------|----|-------------|-------------|-------------|
| 6 | -3.38214922 | 1.26914406  | 1.89865863  | 6  | 2.35285068  | 5.56894398  | -0.29484132 |
| 6 | -1.96684933 | -1.35285592 | -2.34784126 | 1  | 3.43525076  | 5.42224407  | -0.27984133 |
| 6 | -2.57604933 | 2.53564405  | 1.54535866  | 1  | 1.99105084  | 5.68804407  | -1.31894135 |
| 1 | -1.64724922 | 2.29684401  | 1.02725863  | 1  | 2.09055066  | 6.44804430  | 0.29125869  |
| 1 | -2.32734919 | 3.09714389  | 2.45485878  | 8  | 2.08045077  | -0.42135596 | -0.50814134 |
| 1 | -3.16654921 | 3.19164395  | 0.89585871  | 15 | 2.79535079  | -1.35045600 | 0.50555867  |
| 6 | -2.59784913 | 0.39234403  | 2.89525867  | 8  | 4.18625069  | -1.65595603 | -0.44914132 |
| 1 | -1.67254925 | 0.01654403  | 2.45655870  | 8  | 2.45885086  | -2.96635604 | 0.55045867  |
| 1 | -3.19764924 | -0.47205597 | 3.20095873  | 6  | 4.00825071  | -2.83215594 | -1.20814133 |
| 1 | -2.34644914 | 0.96554404  | 3.79645872  | 6  | 3.31445074  | -3.78915596 | -0.24654132 |
| 6 | -4.64474916 | 1.74384403  | 2.64025879  | 1  | 4.98425102  | -3.20155597 | -1.53484130 |
| 1 | -5.27504921 | 0.90924400  | 2.96625876  | 1  | 3.38335085  | -2.63475609 | -2.09034133 |
| 1 | -5.25504923 | 2.41934395  | 2.03115869  | 1  | 2.69275069  | -4.53425598 | -0.74814135 |
| 1 | -4.34694910 | 2.29644394  | 3.53865862  | 1  | 4.03095055  | -4.29235601 | 0.41205868  |
| 6 | -2.57644916 | -2.05665612 | -3.57384133 | 8  | 3.68005085  | -0.71055597 | 1.71355867  |
| 1 | -3.17654920 | -1.37605596 | -4.18724155 | 6  | 5.10645056  | -0.60865599 | 1.74125862  |
| 1 | -3.20284915 | -2.90985608 | -3.29314137 | 1  | 5.57895088  | -1.59195590 | 1.69365871  |
| 1 | -1.76834917 | -2.43995595 | -4.20754147 | 1  | 5.48005056  | 0.00764403  | 0.92145866  |
| 6 | -1.12894917 | -2.41915607 | -1.61344135 | 1  | 5.34075069  | -0.13295597 | 2.69595861  |
| 1 | -0.66624916 | -2.03695607 | -0.70294130 | 1  | 0.06895077  | -3.25945592 | 3.88075876  |
| 1 | -0.33344921 | -2.80135608 | -2.26514125 | 1  | -0.79834926 | -2.39145613 | 2.60295868  |
| 1 | -1.76394916 | -3.26345611 | -1.32354128 | 1  | 0.39985076  | -3.62695599 | 2.17275858  |
| 6 | -1.07044923 | -0.22625598 | -2.90234137 | 1  | -6.44584942 | -0.56425595 | -1.15974128 |
| 1 | -1.65874910 | 0.44984403  | -3.53254128 |    |             |             |             |

### TS-23\_CP

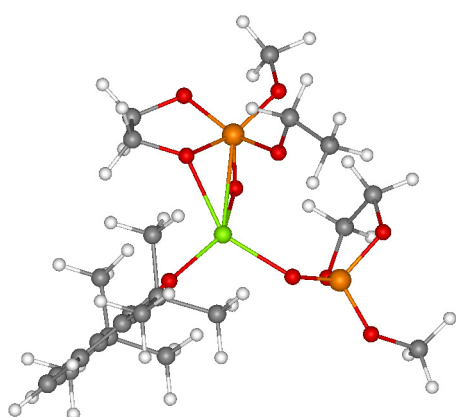

Zero-point vibrational energy

1643386.5 (Joules/Mol)

392.77879 (Kcal/Mol)

Zero-point correction=

0.625933 (Hartree/Particle)

Thermal correction to Energy=

0.666641

Thermal correction to Enthalpy=

0.667585

|                                              |              |
|----------------------------------------------|--------------|
| Thermal correction to Gibbs Free Energy=     | 0.550969     |
| Sum of electronic and zero-point Energies=   | -2496.472669 |
| Sum of electronic and thermal Energies=      | -2496.431961 |
| Sum of electronic and thermal Enthalpies=    | -2496.431016 |
| Sum of electronic and thermal Free Energies= | -2496.547633 |

|    |             |             |             | cartesian |             |             |             |
|----|-------------|-------------|-------------|-----------|-------------|-------------|-------------|
| 12 | -0.46078813 | -0.07986808 | -0.08209602 | 1         | 0.91301191  | 1.99273193  | 3.36870384  |
| 8  | -2.48428822 | -1.05306804 | -1.10749602 | 1         | 0.91201186  | 1.78903198  | 1.60400391  |
| 8  | 1.38161194  | 0.08873192  | 0.01360398  | 6         | -2.78728819 | -0.75856811 | -3.46929598 |
| 6  | -2.75938821 | -1.75566804 | -2.32859612 | 8         | -1.19088817 | 1.73093200  | -0.60479605 |
| 1  | -3.72698808 | -2.26016808 | -2.22699594 | 15        | -2.36728811 | 2.54853177  | -0.20409602 |
| 1  | -1.98288810 | -2.51246810 | -2.49289608 | 8         | -2.74498820 | 2.51143193  | 1.34900391  |
| 6  | 2.69871187  | 0.22153193  | 0.09280398  | 8         | -3.79758811 | 2.13223195  | -0.79209602 |
| 6  | 3.50461197  | 0.11553192  | -1.08599603 | 6         | -3.96658802 | 1.76873195  | 1.58040392  |
| 6  | 4.89331198  | 0.21093193  | -0.95479608 | 6         | -4.52028799 | 1.35403192  | 0.19620398  |
| 1  | 5.52511168  | 0.12433192  | -1.83249605 | 1         | -4.64158821 | 2.43453193  | 2.12210393  |
| 6  | 5.50731182  | 0.41823190  | 0.27570397  | 1         | -3.71168804 | 0.89563191  | 2.18000388  |
| 6  | 4.71571207  | 0.55553192  | 1.41080391  | 1         | -4.35138798 | 0.29703194  | -0.01009602 |
| 1  | 5.21011209  | 0.73443192  | 2.35990405  | 1         | -5.57568789 | 1.60313201  | 0.07920398  |
| 6  | 3.32121181  | 0.47253191  | 1.35770392  | 8         | -2.10258818 | 4.04253197  | -0.63319600 |
| 6  | 2.87721181  | -0.08456808 | -2.47829604 | 6         | -3.06578803 | 5.07783222  | -0.35169601 |
| 6  | 2.49121189  | 0.66803193  | 2.64060402  | 1         | -4.01688814 | 4.85243225  | -0.83899605 |
| 6  | 1.93631196  | 1.09133196  | -2.81299615 | 1         | -3.19948816 | 5.18393230  | 0.72700393  |
| 1  | 1.16201186  | 1.23183191  | -2.05769610 | 1         | -2.64418817 | 5.99283218  | -0.76419604 |
| 1  | 1.45181191  | 0.93043190  | -3.78469610 | 8         | -1.93638813 | -0.66336811 | 1.22650397  |
| 1  | 2.50411177  | 2.02623200  | -2.87339616 | 15        | -2.33268809 | -1.88506806 | 0.37540397  |
| 6  | 2.11921191  | -1.42506802 | -2.54819608 | 8         | -2.15548801 | -3.28226805 | 1.26180398  |
| 1  | 1.32821190  | -1.49046803 | -1.80049610 | 8         | -0.69828808 | -2.23676825 | -0.30899602 |
| 1  | 2.80731177  | -2.26076818 | -2.37699604 | 6         | -0.80588812 | -3.57026815 | 1.60860395  |
| 1  | 1.66931200  | -1.55966806 | -3.54029608 | 6         | 0.00811189  | -3.27786803 | 0.34980398  |
| 6  | 3.93321180  | -0.12516807 | -3.59779596 | 1         | -0.75458813 | -4.61816788 | 1.90980399  |
| 1  | 4.62861204  | -0.96406811 | -3.48509598 | 1         | -0.50138813 | -2.93066812 | 2.44340396  |
| 1  | 4.51591206  | 0.80043191  | -3.65199614 | 1         | 1.02341187  | -2.94686818 | 0.57900393  |
| 1  | 3.42891192  | -0.24916808 | -4.56309605 | 1         | 0.04901189  | -4.14746809 | -0.31559601 |
| 6  | 3.36911178  | 0.95323193  | 3.87230396  | 8         | -3.96598816 | -2.11186814 | 0.33580399  |
| 1  | 3.96691179  | 1.86293197  | 3.75290394  | 6         | -4.69828796 | -2.84896827 | 1.31940401  |
| 1  | 4.04631186  | 0.12363192  | 4.10240412  | 1         | -4.53238821 | -3.92236805 | 1.20970392  |
| 1  | 2.72491193  | 1.09993196  | 4.74690390  | 1         | -4.42638826 | -2.54566813 | 2.33400393  |
| 6  | 1.68521190  | -0.60426807 | 2.96880388  | 1         | -5.75148821 | -2.62006807 | 1.13760400  |
| 1  | 0.99731183  | -0.86216807 | 2.16320395  | 1         | -3.01908803 | -1.27436805 | -4.40659618 |

|   |            |             |            |   |             |             |             |
|---|------------|-------------|------------|---|-------------|-------------|-------------|
| 1 | 1.09901190 | -0.46506810 | 3.88550401 | 1 | -3.54798818 | 0.00793192  | -3.29829597 |
| 1 | 2.36111188 | -1.45306802 | 3.12310386 | 1 | -1.81888807 | -0.26376808 | -3.58309603 |
| 6 | 1.55111194 | 1.88073194  | 2.48340392 | 1 | 6.59051180  | 0.48293191  | 0.34750399  |
| 1 | 2.13561177 | 2.80023193  | 2.36880398 |   |             |             |             |

### I-3\_CP

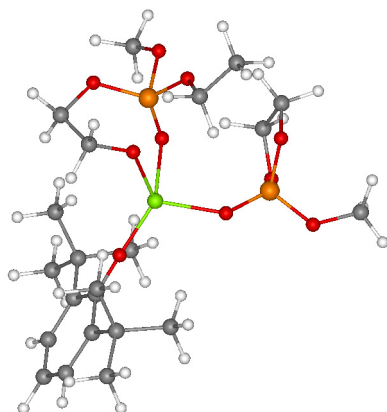

|                                              |                             |
|----------------------------------------------|-----------------------------|
| Zero-point vibrational energy                | 1643197.0 (Joules/Mol)      |
|                                              | 392.73350 (Kcal/Mol)        |
| Zero-point correction=                       | 0.625861 (Hartree/Particle) |
| Thermal correction to Energy=                | 0.667501                    |
| Thermal correction to Enthalpy=              | 0.668446                    |
| Thermal correction to Gibbs Free Energy=     | 0.549508                    |
| Sum of electronic and zero-point Energies=   | -2496.490683                |
| Sum of electronic and thermal Energies=      | -2496.449042                |
| Sum of electronic and thermal Enthalpies=    | -2496.448098                |
| Sum of electronic and thermal Free Energies= | -2496.567035                |

| cartesian |             |             |             |    |             |             |             |
|-----------|-------------|-------------|-------------|----|-------------|-------------|-------------|
| 12        | 0.26832652  | 0.02891735  | 0.22843331  | 1  | -0.89907342 | -0.87418264 | -3.62356663 |
| 8         | 3.69682670  | -1.03028262 | 1.22113335  | 1  | -0.97147352 | 0.19851735  | -2.21186662 |
| 8         | -1.57337356 | 0.05761734  | 0.09073333  | 1  | 2.99442649  | 0.64781737  | 2.22873354  |
| 6         | 3.61282659  | -0.23198265 | 2.41413355  | 8  | 1.13502645  | 1.83421731  | -0.07396667 |
| 6         | 5.02822638  | 0.15801734  | 2.79023337  | 15 | 2.30052662  | 2.34731722  | -0.84406668 |
| 1         | 3.14902663  | -0.81368262 | 3.21433353  | 8  | 2.44092655  | 1.90691733  | -2.37596655 |
| 6         | -2.88367343 | 0.09791735  | -0.12576666 | 8  | 3.73302650  | 1.85031736  | -0.32856667 |
| 6         | -3.73677349 | 0.80691737  | 0.77853334  | 6  | 3.44752669  | 0.86461735  | -2.49686646 |
| 6         | -5.11367321 | 0.80421734  | 0.53603333  | 6  | 4.44272661  | 1.09821737  | -1.34706664 |
| 1         | -5.78077364 | 1.33021736  | 1.21073329  | 1  | 3.90732670  | 0.97901738  | -3.47866654 |
| 6         | -5.67097330 | 0.14531735  | -0.55456668 | 1  | 2.94822669  | -0.09948265 | -2.40276647 |
| 6         | -4.83347321 | -0.52508265 | -1.43906665 | 1  | 4.76852655  | 0.15991735  | -0.89776665 |
| 1         | -5.28387356 | -1.02558267 | -2.28966665 | 1  | 5.30332661  | 1.69971740  | -1.65056670 |

|   |             |             |             |    |             |             |             |
|---|-------------|-------------|-------------|----|-------------|-------------|-------------|
| 6 | -3.44737339 | -0.56758261 | -1.26056671 | 8  | 2.24772644  | 3.92411733  | -0.80686671 |
| 6 | -3.17327332 | 1.57501733  | 1.98953331  | 6  | 3.25982666  | 4.72041702  | -1.45456672 |
| 6 | -2.56567335 | -1.31468260 | -2.27936649 | 1  | 4.23022652  | 4.55481720  | -0.98056668 |
| 6 | -2.22547340 | 2.69541717  | 1.51593328  | 1  | 3.30352664  | 4.48571730  | -2.52036667 |
| 1 | -1.40347338 | 2.31101727  | 0.91163331  | 1  | 2.95402670  | 5.75601721  | -1.31646669 |
| 1 | -1.80107331 | 3.22901726  | 2.37593341  | 8  | 1.72392654  | -1.00528264 | -0.66266668 |
| 1 | -2.77217340 | 3.42291737  | 0.90583330  | 15 | 2.52572656  | -1.78088260 | 0.40713331  |
| 6 | -2.43817329 | 0.61571735  | 2.94693351  | 8  | 2.02012658  | -3.21408272 | 0.99613333  |
| 1 | -1.62617350 | 0.09311734  | 2.44013333  | 8  | 1.16712654  | -1.01538265 | 1.69013333  |
| 1 | -3.12947345 | -0.13818264 | 3.34023333  | 6  | 0.81632650  | -3.30688286 | 1.76293337  |
| 1 | -2.01907349 | 1.16701734  | 3.79813337  | 6  | 0.69402653  | -2.01478267 | 2.55683351  |
| 6 | -4.27647352 | 2.25521731  | 2.81883335  | 1  | 0.90812653  | -4.19448280 | 2.39253354  |
| 1 | -4.98867321 | 1.53441739  | 3.23453355  | 1  | -0.02687347 | -3.43258286 | 1.07593334  |
| 1 | -4.83557320 | 2.99581718  | 2.23723340  | 1  | -0.34417349 | -1.82828259 | 2.84913349  |
| 1 | -3.81747341 | 2.78351736  | 3.66223335  | 1  | 1.30932653  | -2.05748272 | 3.46803355  |
| 6 | -3.38597345 | -1.94148266 | -3.42106652 | 8  | 3.68002653  | -2.48408270 | -0.53786665 |
| 1 | -3.93707323 | -1.19048262 | -3.99656653 | 6  | 3.25802660  | -3.35738277 | -1.58016670 |
| 1 | -4.09937334 | -2.68878269 | -3.05796647 | 1  | 2.80382657  | -4.26558256 | -1.17096663 |
| 1 | -2.70677352 | -2.45028281 | -4.11506701 | 1  | 2.54432654  | -2.86478281 | -2.25016665 |
| 6 | -1.81787348 | -2.47738266 | -1.59666669 | 1  | 4.15442657  | -3.62948275 | -2.14206648 |
| 1 | -1.20657349 | -2.13058281 | -0.76266670 | 1  | 5.01112652  | 0.75081736  | 3.71033335  |
| 1 | -1.16347337 | -2.99008274 | -2.31206656 | 1  | 5.64592648  | -0.72808266 | 2.95933342  |
| 1 | -2.53227329 | -3.20958281 | -1.20436668 | 1  | 5.49062681  | 0.76041734  | 2.00393343  |
| 6 | -1.57477355 | -0.33848265 | -2.94556665 | 1  | -6.74617338 | 0.15901735  | -0.71646667 |
| 1 | -2.11707330 | 0.41211733  | -3.53066659 |    |             |             |             |

#### I-4\_CP

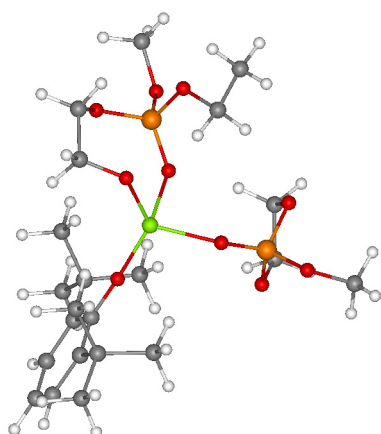

Zero-point vibrational energy

1640580.5 (Joules/Mol)

392.10815 (Kcal/Mol)

Zero-point correction=

0.624864 (Hartree/Particle)

Thermal correction to Energy=

0.667099



|                                              |              |
|----------------------------------------------|--------------|
| Thermal correction to Enthalpy=              | 0.668043     |
| Thermal correction to Gibbs Free Energy=     | 0.546623     |
| Sum of electronic and zero-point Energies=   | -2496.494176 |
| Sum of electronic and thermal Energies=      | -2496.451941 |
| Sum of electronic and thermal Enthalpies=    | -2496.450997 |
| Sum of electronic and thermal Free Energies= | -2496.572417 |

|    |             |             |             | cartesian |             |             |             |
|----|-------------|-------------|-------------|-----------|-------------|-------------|-------------|
| 12 | 0.39618522  | -0.00831600 | 0.80612534  | 1         | -0.33831477 | -0.68631601 | -3.48837471 |
| 8  | 3.54258537  | -2.15861607 | -1.44747472 | 1         | -0.63811475 | 0.18698400  | -1.96587467 |
| 8  | -1.36531472 | -0.18701601 | 0.21162534  | 1         | 5.41748524  | -2.85931611 | -0.85347468 |
| 6  | 4.53808498  | -3.19411612 | -1.40997469 | 8         | 0.95178527  | 1.96198404  | 0.72722536  |
| 1  | 4.81038523  | -3.38791609 | -2.44717479 | 15        | 1.35068536  | 2.95688391  | -0.29767466 |
| 1  | 4.12698507  | -4.10021591 | -0.95947468 | 8         | 0.39468524  | 3.05168390  | -1.58157468 |
| 6  | -2.64871478 | -0.36481601 | -0.06987467 | 8         | 2.73628521  | 2.69568396  | -1.07477462 |
| 6  | -3.66251469 | 0.07508401  | 0.84232533  | 6         | 1.11698532  | 2.76018405  | -2.80207467 |
| 6  | -5.00301504 | -0.12451599 | 0.49862534  | 6         | 2.43178535  | 2.10508394  | -2.36687469 |
| 1  | -5.78631496 | 0.20168400  | 1.17482531  | 1         | 1.27628517  | 3.70498395  | -3.32907486 |
| 6  | -5.38011503 | -0.73411602 | -0.69337469 | 1         | 0.49808526  | 2.09408402  | -3.40257478 |
| 6  | -4.39211512 | -1.16281605 | -1.57307470 | 1         | 2.33418536  | 1.02518404  | -2.23507476 |
| 1  | -4.70201492 | -1.64001596 | -2.49717474 | 1         | 3.26118541  | 2.33858395  | -3.03437471 |
| 6  | -3.03171468 | -0.99821603 | -1.29727471 | 8         | 1.46518517  | 4.37308407  | 0.38792533  |
| 6  | -3.30861473 | 0.75348401  | 2.17912531  | 6         | 1.75338531  | 5.55788422  | -0.38107467 |
| 6  | -1.98071480 | -1.50101602 | -2.30407476 | 1         | 2.72298527  | 5.46388435  | -0.87557465 |
| 6  | -2.52911472 | 2.05998397  | 1.92722535  | 1         | 0.95998526  | 5.73498440  | -1.11077464 |
| 1  | -1.63121486 | 1.89248395  | 1.33272529  | 1         | 1.78208518  | 6.37598419  | 0.33662534  |
| 1  | -2.23391461 | 2.52318406  | 2.87722516  | 8         | 1.87628531  | -0.57601601 | -0.52157468 |
| 1  | -3.15691471 | 2.77548409  | 1.38372529  | 15        | 2.88228536  | -1.61151600 | -0.10287467 |
| 6  | -2.49721479 | -0.20691600 | 3.07182527  | 8         | 2.38328528  | -2.94841599 | 0.58532536  |
| 1  | -1.58361483 | -0.55391598 | 2.58772516  | 8         | 1.26348519  | -0.94961596 | 2.21922517  |
| 1  | -3.09581470 | -1.09091604 | 3.31862521  | 6         | 2.24408531  | -3.11081600 | 2.02972531  |
| 1  | -2.21691465 | 0.28428400  | 4.01192522  | 6         | 1.08688521  | -2.27861595 | 2.55992532  |
| 6  | -4.55741501 | 1.14458394  | 2.99002528  | 1         | 3.18908525  | -2.80691600 | 2.48962522  |
| 1  | -5.16711473 | 0.27548400  | 3.25942516  | 1         | 2.09378529  | -4.18401575 | 2.17062521  |
| 1  | -5.19241476 | 1.86008406  | 2.45662522  | 1         | 0.14578524  | -2.70831609 | 2.17102528  |
| 1  | -4.24181509 | 1.62268400  | 3.92452526  | 1         | 1.06778526  | -2.43271589 | 3.65522528  |
| 6  | -2.61491466 | -2.13541603 | -3.55437469 | 8         | 4.10738516  | -1.08261597 | 0.76332533  |
| 1  | -3.24151468 | -1.42761600 | -4.10787487 | 6         | 4.10708523  | 0.20038401  | 1.46172535  |
| 1  | -3.22171474 | -3.01371598 | -3.31037474 | 1         | 3.97438526  | 0.98998398  | 0.71772534  |
| 1  | -1.81931472 | -2.46761608 | -4.23167467 | 1         | 3.25978541  | 0.20028400  | 2.15102530  |
| 6  | -1.10101485 | -2.58901596 | -1.65707469 | 6         | 5.43298483  | 0.32948402  | 2.17612529  |

|   |             |             |             |   |             |             |             |
|---|-------------|-------------|-------------|---|-------------|-------------|-------------|
| 1 | -0.61651474 | -2.22701597 | -0.75047469 | 1 | 5.46268511  | 1.28628397  | 2.70632529  |
| 1 | -0.32201475 | -2.92431593 | -2.35317469 | 1 | 5.56278515  | -0.47031599 | 2.91002512  |
| 1 | -1.71221471 | -3.45731592 | -1.38757467 | 1 | 6.26998520  | 0.29908401  | 1.47282529  |
| 6 | -1.11541486 | -0.32541600 | -2.80157471 | 1 | -6.43161488 | -0.87481600 | -0.93257469 |
| 1 | -1.73981476 | 0.40008399  | -3.33647490 |   |             |             |             |

## TS-45\_CP

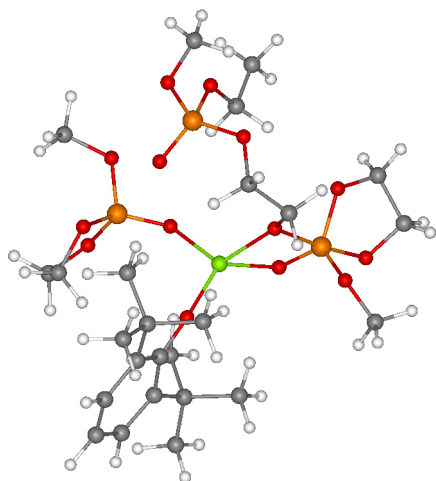

|                                              |                             |
|----------------------------------------------|-----------------------------|
| Zero-point vibrational energy                | 1949671.9 (Joules/Mol)      |
|                                              | 465.98276 (Kcal/Mol)        |
| Zero-point correction=                       | 0.742591 (Hartree/Particle) |
| Thermal correction to Energy=                | 0.793301                    |
| Thermal correction to Enthalpy=              | 0.794245                    |
| Thermal correction to Gibbs Free Energy=     | 0.655007                    |
| Sum of electronic and zero-point Energies=   | -3257.059837                |
| Sum of electronic and thermal Energies=      | -3257.009126                |
| Sum of electronic and thermal Enthalpies=    | -3257.008182                |
| Sum of electronic and thermal Free Energies= | -3257.147421                |

| cartesian |             |             |             |   |             |             |             |
|-----------|-------------|-------------|-------------|---|-------------|-------------|-------------|
| 12        | -0.10523887 | 0.60592556  | 0.45948553  | 6 | -2.38783884 | -0.08727442 | -2.44541430 |
| 8         | -3.87353897 | -3.23817420 | -1.69531453 | 1 | -1.50293887 | 1.83552551  | -2.67241430 |
| 8         | 1.60886109  | 0.37242556  | -0.27001446 | 1 | -3.14113879 | 1.85762560  | -1.98391449 |
| 6         | -5.22003889 | -3.18237424 | -2.19191432 | 1 | -2.66273880 | -0.08047442 | -3.50501442 |
| 1         | -5.36953878 | -2.28767443 | -2.80231452 | 1 | -1.48033893 | -0.68247443 | -2.31961441 |
| 1         | -5.93093872 | -3.19097424 | -1.36221457 | 8 | -4.34663868 | -1.86157441 | 0.30078554  |
| 6         | 2.89426112  | 0.16092558  | -0.51581448 | 6 | -4.16563892 | -0.82287443 | 1.30668545  |
| 6         | 3.28926110  | -0.53407443 | -1.70731449 | 1 | -3.25853896 | -1.05067444 | 1.87138546  |
| 6         | 4.63826132  | -0.86317444 | -1.87411451 | 1 | -4.03683901 | 0.13832557  | 0.80188555  |
| 1         | 4.95426130  | -1.40937448 | -2.75681448 | 6 | -5.38843870 | -0.82667446 | 2.19628549  |

---

|    |             |             |             |    |             |             |             |
|----|-------------|-------------|-------------|----|-------------|-------------|-------------|
| 6  | 5.60786152  | -0.50327444 | -0.94411451 | 1  | 6.64876127  | -0.77927446 | -1.09591448 |
| 6  | 5.23256111  | 0.25902557  | 0.15728553  | 8  | -0.76333886 | 2.24552560  | 1.33788550  |
| 1  | 6.00896120  | 0.58222556  | 0.84278554  | 15 | -1.78053892 | 2.88952565  | 0.39088553  |
| 6  | 3.90356088  | 0.62822556  | 0.39188552  | 8  | -2.06553888 | 4.26472569  | 1.34818542  |
| 6  | 2.27416110  | -0.89087445 | -2.81031442 | 8  | -3.40323901 | 2.56412578  | 0.33818552  |
| 6  | 3.57036114  | 1.56222558  | 1.57158554  | 6  | -3.37853885 | 4.75012589  | 1.18758547  |
| 6  | 1.53546107  | 0.38072556  | -3.27601433 | 6  | -4.22463894 | 3.49252558  | 1.05098546  |
| 1  | 1.02306116  | 0.87532556  | -2.45001435 | 1  | -3.46813893 | 5.38092566  | 0.28948551  |
| 1  | 0.79946113  | 0.12892558  | -4.05061483 | 1  | -3.64923882 | 5.34512568  | 2.06388545  |
| 1  | 2.24286103  | 1.09712553  | -3.70821428 | 1  | -4.46603870 | 3.06542563  | 2.03018546  |
| 6  | 1.27086115  | -1.94707441 | -2.31591439 | 1  | -5.14243889 | 3.64172578  | 0.47708553  |
| 1  | 0.72126114  | -1.62297440 | -1.43271446 | 8  | -1.24203885 | 3.70572567  | -0.91811448 |
| 1  | 1.78846121  | -2.87887430 | -2.06081438 | 6  | -0.60113883 | 4.98252583  | -0.79711443 |
| 1  | 0.54206109  | -2.18627429 | -3.10071445 | 1  | -1.32543886 | 5.77552557  | -0.59441447 |
| 6  | 2.95436120  | -1.47947443 | -4.05981445 | 1  | 0.15396112  | 4.97362566  | -0.00881447 |
| 1  | 3.44966102  | -2.43497443 | -3.85531449 | 1  | -0.12213886 | 5.16152573  | -1.76161456 |
| 1  | 3.69146109  | -0.79427445 | -4.49171448 | 8  | -0.42933887 | -0.88297445 | 1.76598549  |
| 1  | 2.19386101  | -1.67007446 | -4.82571459 | 15 | -0.07483886 | -2.30377436 | 2.02568555  |
| 6  | 4.83186150  | 2.05332565  | 2.30558562  | 8  | 1.04176116  | -2.46877432 | 3.17738557  |
| 1  | 5.51156139  | 2.59672570  | 1.64078546  | 8  | 0.66666114  | -3.14627433 | 0.88738555  |
| 1  | 5.39026117  | 1.23642552  | 2.77618551  | 6  | 2.21396112  | -3.15127420 | 2.68018556  |
| 1  | 4.53486156  | 2.74232578  | 3.10428572  | 6  | 2.09196115  | -3.14687443 | 1.15248549  |
| 6  | 2.70966101  | 0.84742558  | 2.62968564  | 1  | 2.21456122  | -4.16377449 | 3.09418559  |
| 1  | 1.79806113  | 0.42092556  | 2.21268559  | 1  | 3.09436107  | -2.60897422 | 3.02528548  |
| 1  | 2.41666102  | 1.54032552  | 3.42668557  | 1  | 2.53526115  | -2.25737429 | 0.69858551  |
| 1  | 3.27586102  | 0.02952558  | 3.09108567  | 1  | 2.50616121  | -4.04317427 | 0.69168556  |
| 6  | 2.85676122  | 2.82672572  | 1.04988551  | 8  | -1.37093890 | -3.07987428 | 2.47548556  |
| 1  | 3.51626110  | 3.37452579  | 0.36748552  | 6  | -1.36163890 | -4.50837421 | 2.65898561  |
| 1  | 2.59816122  | 3.49112558  | 1.88238549  | 1  | -1.10353887 | -5.00257444 | 1.72108543  |
| 1  | 1.93866110  | 2.59082580  | 0.51228553  | 1  | -0.66403890 | -4.78597450 | 3.45378566  |
| 8  | -1.85423887 | -2.27447438 | -0.47051448 | 1  | -2.37553883 | -4.77537441 | 2.95278549  |
| 15 | -3.25963879 | -2.02737427 | -0.85421449 | 1  | -5.27103853 | -0.07037442 | 2.97818565  |
| 8  | -1.64153886 | 1.36812556  | -0.66011447 | 1  | -6.29173851 | -0.59547442 | 1.62488544  |
| 8  | -3.48503900 | -0.70207441 | -1.73141456 | 1  | -5.51973867 | -1.79967439 | 2.67798567  |
| 6  | -2.18143892 | 1.33172560  | -1.97311461 | 1  | -5.35413885 | -4.07317448 | -2.80591440 |

---

# I-5\_CP

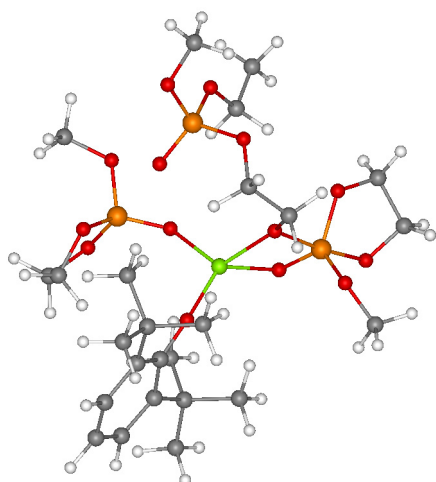

|                                              |                             |
|----------------------------------------------|-----------------------------|
| Zero-point vibrational energy                | 1944471.0 (Joules/Mol)      |
|                                              | 464.73972 (Kcal/Mol)        |
| Zero-point correction=                       | 0.740610 (Hartree/Particle) |
| Thermal correction to Energy=                | 0.793970                    |
| Thermal correction to Enthalpy=              | 0.794915                    |
| Thermal correction to Gibbs Free Energy=     | 0.643328                    |
| Sum of electronic and zero-point Energies=   | -3257.061075                |
| Sum of electronic and thermal Energies=      | -3257.007714                |
| Sum of electronic and thermal Enthalpies=    | -3257.006770                |
| Sum of electronic and thermal Free Energies= | -3257.158357                |

| cartesian |             |             |             |    |             |             |             |  |  |  |  |
|-----------|-------------|-------------|-------------|----|-------------|-------------|-------------|--|--|--|--|
| 12        | -0.78191978 | 0.80300331  | 0.25762117  | 6  | 3.13168025  | 0.86020327  | 3.39682126  |  |  |  |  |
| 8         | 0.83498025  | 1.41350329  | -0.52077883 | 6  | 2.86308026  | -0.56529677 | 2.91732121  |  |  |  |  |
| 8         | -1.97581971 | -0.58359671 | -0.17047884 | 1  | 3.42058015  | 0.90120327  | 4.45042086  |  |  |  |  |
| 6         | 1.98348033  | 0.91010332  | -1.10357881 | 1  | 3.86988020  | 1.35500324  | 2.76872134  |  |  |  |  |
| 1         | 1.86898029  | 0.72880328  | -2.18597865 | 1  | 2.99818015  | -0.65699673 | 1.83972120  |  |  |  |  |
| 1         | 2.30588007  | -0.05429673 | -0.66697884 | 1  | 3.47338009  | -1.30459678 | 3.43492126  |  |  |  |  |
| 6         | -2.67501974 | -1.69249678 | -0.35637885 | 8  | 0.04948026  | 0.65800327  | 4.76662111  |  |  |  |  |
| 6         | -2.06531978 | -2.85199666 | -0.93887889 | 6  | -1.32901967 | 0.31890327  | 5.04992104  |  |  |  |  |
| 6         | -2.83681989 | -4.00569677 | -1.10437882 | 1  | -1.98221982 | 0.68850327  | 4.25912094  |  |  |  |  |
| 1         | -2.39181972 | -4.89329672 | -1.54187882 | 1  | -1.42581975 | -0.76419675 | 5.14692116  |  |  |  |  |
| 6         | -4.17431974 | -4.06279659 | -0.72737885 | 1  | -1.56361973 | 0.80240327  | 5.99712086  |  |  |  |  |
| 6         | -4.76741982 | -2.93019676 | -0.17997883 | 8  | -1.77261972 | 2.58810329  | 0.15462117  |  |  |  |  |
| 1         | -5.81441975 | -2.98629665 | 0.09952117  | 15 | -1.81491971 | 3.70770335  | -0.82487887 |  |  |  |  |
| 6         | -4.06011963 | -1.74009681 | 0.01262116  | 8  | -3.18701982 | 4.53910303  | -0.89547884 |  |  |  |  |
| 6         | -0.59221977 | -2.84669685 | -1.38607883 | 8  | -1.75891972 | 3.23600316  | -2.35997868 |  |  |  |  |
| 6         | -4.78031969 | -0.50989676 | 0.59402114  | 6  | -3.89301991 | 4.21950340  | -2.11417866 |  |  |  |  |
| 6         | 0.33268026  | -2.62909675 | -0.17207883 | 6  | -2.80141973 | 3.87070322  | -3.12727880 |  |  |  |  |

---

|    |             |             |             |    |             |             |             |
|----|-------------|-------------|-------------|----|-------------|-------------|-------------|
| 1  | 0.08858025  | -1.71499681 | 0.37112117  | 1  | -4.47271967 | 5.09790325  | -2.39887881 |
| 1  | 1.38138032  | -2.57369685 | -0.48997885 | 1  | -4.55891943 | 3.37460327  | -1.92227876 |
| 1  | 0.23568025  | -3.46039677 | 0.53512114  | 1  | -3.13741994 | 3.15920329  | -3.88177896 |
| 6  | -0.35921979 | -1.76519680 | -2.46047878 | 1  | -2.38731980 | 4.76090336  | -3.60927868 |
| 1  | -0.62621975 | -0.76899672 | -2.10657883 | 8  | -0.72921973 | 4.82210302  | -0.57177883 |
| 1  | -0.96761972 | -1.97889686 | -3.34657884 | 6  | 0.40698025  | 4.58150339  | 0.30762118  |
| 1  | 0.69298023  | -1.75059676 | -2.76957870 | 1  | 0.08268026  | 4.70280313  | 1.34242117  |
| 6  | -0.16281976 | -4.18299675 | -2.01817870 | 1  | 0.81228024  | 3.58060336  | 0.13912116  |
| 1  | -0.74441975 | -4.42299652 | -2.91477871 | 1  | 1.13378024  | 5.35040331  | 0.04802117  |
| 1  | -0.24641974 | -5.02189684 | -1.31877887 | 8  | 4.39028025  | 1.47060323  | -1.43347883 |
| 1  | 0.88838023  | -4.11509657 | -2.32167864 | 1  | 2.89718008  | 2.84540319  | -1.43727887 |
| 6  | -6.26611948 | -0.77999675 | 0.89072114  | 1  | 3.22478008  | 2.14110327  | 0.16622117  |
| 1  | -6.40481949 | -1.56969678 | 1.63712120  | 1  | -4.74891949 | -4.97559690 | -0.86547887 |
| 1  | -6.82571936 | -1.05659676 | -0.00927883 | 15 | 5.32568026  | 0.49280328  | -0.60427886 |
| 1  | -6.72401953 | 0.13130328  | 1.29262114  | 8  | 5.15968037  | -0.90089679 | -1.35967886 |
| 6  | -4.73731947 | 0.65070331  | -0.42107886 | 8  | 6.80798054  | 0.91180325  | -1.05567884 |
| 1  | -3.70921993 | 0.90680325  | -0.67797887 | 8  | 5.10408020  | 0.48060328  | 0.86602116  |
| 1  | -5.22951937 | 1.53960323  | -0.00387883 | 6  | 7.39258051  | 2.09380341  | -0.48817885 |
| 1  | -5.26451969 | 0.36560327  | -1.33907890 | 6  | 5.92628050  | -2.04749680 | -0.91587889 |
| 6  | -4.13671970 | -0.08379671 | 1.92862117  | 6  | 5.49418020  | -3.24299669 | -1.73557889 |
| 1  | -4.24311972 | -0.88479674 | 2.66942120  | 1  | 6.98948050  | -1.83019686 | -1.05937886 |
| 1  | -4.62931967 | 0.81360328  | 2.32482123  | 1  | 5.74068022  | -2.20559669 | 0.15122117  |
| 1  | -3.07411981 | 0.12820329  | 1.81142116  | 1  | 6.85728025  | 2.98380327  | -0.83137888 |
| 6  | 3.11018014  | 1.91980326  | -0.89847887 | 1  | 7.37968063  | 2.04400325  | 0.60362118  |
| 8  | -0.40501976 | 0.71120328  | 2.26802135  | 1  | 8.42168045  | 2.12820339  | -0.84587884 |
| 15 | 0.64738023  | 0.53580326  | 3.30532122  | 1  | 6.06318045  | -4.12519693 | -1.42677879 |
| 8  | 1.86738026  | 1.56330323  | 3.25702119  | 1  | 4.43068027  | -3.44959664 | -1.59247887 |
| 8  | 1.47488034  | -0.83399677 | 3.24612117  | 1  | 5.67478037  | -3.06909680 | -2.79937863 |

---

## S1.6. PC sequence, mononuclear mechanism

### I-1\_PC

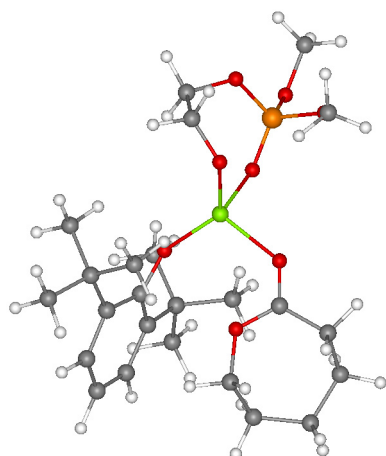

|                                              |                             |
|----------------------------------------------|-----------------------------|
| Zero-point vibrational energy                | 1675286.6 (Joules/Mol)      |
|                                              | 400.40310 (Kcal/Mol)        |
| Zero-point correction=                       | 0.638083 (Hartree/Particle) |
| Thermal correction to Energy=                | 0.678025                    |
| Thermal correction to Enthalpy=              | 0.678969                    |
| Thermal correction to Gibbs Free Energy=     | 0.563290                    |
| Sum of electronic and zero-point Energies=   | -2081.514540                |
| Sum of electronic and thermal Energies=      | -2081.474598                |
| Sum of electronic and thermal Enthalpies=    | -2081.473654                |
| Sum of electronic and thermal Free Energies= | -2081.589333                |

| cartesian |             |             |             |   |             |            |             |
|-----------|-------------|-------------|-------------|---|-------------|------------|-------------|
| 12        | 1.31035209  | -0.13747860 | 0.45031193  | 1 | 0.20125212  | 1.82692134 | -3.20378828 |
| 8         | 5.10425234  | 0.56482142  | -1.80868804 | 1 | 0.24685213  | 1.17592132 | -1.56848812 |
| 8         | -0.08244789 | -1.05097866 | -0.44058806 | 1 | 6.93575239  | 1.32642138 | -1.16308808 |
| 6         | 6.54165220  | 0.54452139  | -1.81648803 | 8 | 0.70545208  | 1.71762133 | 1.17021191  |
| 1         | 6.83845234  | 0.73742139  | -2.84688830 | 6 | -0.42414787 | 2.13762140 | 1.44321191  |
| 1         | 6.91135216  | -0.43477857 | -1.50208807 | 8 | -1.43434787 | 1.30272138 | 1.31841195  |
| 6         | -1.37864792 | -1.17727864 | -0.67538810 | 6 | -2.81774783 | 1.66482139 | 1.56751192  |
| 6         | -2.20344782 | -1.96447861 | 0.19571191  | 6 | -3.35934782 | 2.70992136 | 0.60861194  |
| 6         | -3.58804798 | -1.94957864 | -0.00608808 | 1 | -2.91794777 | 1.96812141 | 2.61641192  |
| 1         | -4.23614788 | -2.51487851 | 0.65601194  | 1 | -3.33244777 | 0.71472144 | 1.42511189  |
| 6         | -4.17794800 | -1.24257863 | -1.05088806 | 1 | -3.07964778 | 2.41602159 | -0.40878808 |
| 6         | -3.35814786 | -0.58647859 | -1.96518803 | 1 | -4.45214796 | 2.63682151 | 0.65471190  |
| 1         | -3.82764769 | -0.10137860 | -2.81528831 | 6 | -0.63514793 | 3.55922151 | 1.89011192  |
| 6         | -1.96674788 | -0.55547857 | -1.82728803 | 6 | -1.43794787 | 4.40502167 | 0.88481194  |
| 6         | -1.60224783 | -2.85027862 | 1.30661190  | 1 | -1.04054797 | 4.24382162 | -0.12358808 |

|   |             |             |             |    |             |             |             |
|---|-------------|-------------|-------------|----|-------------|-------------|-------------|
| 6 | -1.10204792 | 0.09852140  | -2.92398810 | 6  | -2.94444776 | 4.14912128  | 0.91291195  |
| 6 | -0.98424792 | -2.01227856 | 2.44281173  | 1  | -1.25304794 | 5.45782137  | 1.12271190  |
| 1 | -0.09634790 | -1.46337867 | 2.12751174  | 8  | 2.83435225  | 0.37312141  | -0.79398805 |
| 1 | -0.67274785 | -2.66417861 | 3.26851177  | 15 | 4.29295206  | 0.30532143  | -0.46878806 |
| 1 | -1.71294796 | -1.29687870 | 2.84021187  | 8  | 4.82425213  | -1.06827867 | 0.12361192  |
| 6 | -0.53614783 | -3.79107857 | 0.70811194  | 8  | 2.46865225  | -0.83777857 | 1.79341197  |
| 1 | 0.25585210  | -3.22737861 | 0.21381192  | 6  | 3.95875216  | -2.19907856 | 0.46031192  |
| 1 | -0.98974788 | -4.46207857 | -0.02968808 | 6  | 3.25525212  | -1.96957862 | 1.79301190  |
| 1 | -0.08974788 | -4.40857840 | 1.49751198  | 1  | 4.63275242  | -3.05897856 | 0.49081191  |
| 6 | -2.66484785 | -3.75257850 | 1.96221197  | 1  | 3.24005222  | -2.33827853 | -0.35408807 |
| 1 | -3.17604780 | -4.38757849 | 1.23091197  | 1  | 2.68335223  | -2.89707851 | 1.99161196  |
| 1 | -3.42194772 | -3.18057847 | 2.51041174  | 1  | 4.03275204  | -1.91687870 | 2.57831192  |
| 1 | -2.17564774 | -4.41387844 | 2.68611193  | 8  | 4.87185240  | 1.43252134  | 0.48921192  |
| 6 | -1.93654788 | 0.51522142  | -4.14878798 | 1  | -5.25764799 | -1.24947870 | -1.18208802 |
| 1 | -2.66814780 | 1.29652131  | -3.91348815 | 1  | -3.42824769 | 4.81812143  | 0.19261192  |
| 1 | -2.46954775 | -0.33277857 | -4.59158802 | 1  | -3.33364773 | 4.43252134  | 1.90051198  |
| 1 | -1.26904786 | 0.92112142  | -4.91718817 | 1  | -1.14044785 | 3.55922151  | 2.86411190  |
| 6 | -0.04574788 | -0.90547860 | -3.43148828 | 1  | 0.36145213  | 3.97842145  | 2.03331184  |
| 1 | 0.60545212  | -1.24167860 | -2.62468815 | 6  | 4.79045200  | 1.34972131  | 1.93491197  |
| 1 | 0.57355213  | -0.44267857 | -4.20958805 | 1  | 3.88965225  | 0.81352139  | 2.24501181  |
| 1 | -0.53624785 | -1.78327870 | -3.86658812 | 1  | 4.77635241  | 2.38022137  | 2.29031181  |
| 6 | -0.41104791 | 1.37652135  | -2.41318822 | 1  | 5.68275213  | 0.83842140  | 2.30301189  |
| 1 | -1.15664792 | 2.11892152  | -2.10378814 |    |             |             |             |

## TS-12\_PC

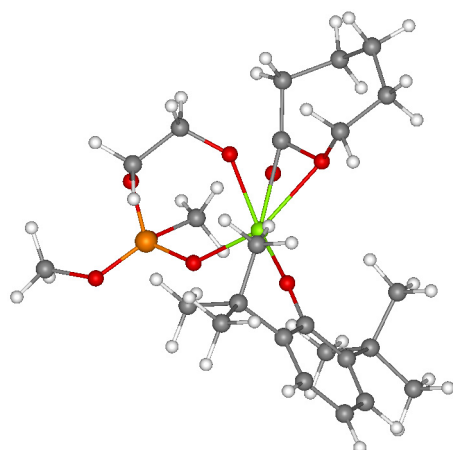

|                                          |                             |
|------------------------------------------|-----------------------------|
| Zero-point vibrational energy            | 1676085.2 (Joules/Mol)      |
|                                          | 400.59398 (Kcal/Mol)        |
| Zero-point correction=                   | 0.638387 (Hartree/Particle) |
| Thermal correction to Energy=            | 0.677014                    |
| Thermal correction to Enthalpy=          | 0.677958                    |
| Thermal correction to Gibbs Free Energy= | 0.566048                    |

|                                              |              |
|----------------------------------------------|--------------|
| Sum of electronic and zero-point Energies=   | -2081.492462 |
| Sum of electronic and thermal Energies=      | -2081.453835 |
| Sum of electronic and thermal Enthalpies=    | -2081.452891 |
| Sum of electronic and thermal Free Energies= | -2081.564802 |

| cartesian |             |             |             |    |             |             |             |
|-----------|-------------|-------------|-------------|----|-------------|-------------|-------------|
| 12        | 0.57755464  | -0.08190262 | -0.27801067 | 1  | -1.59994531 | 1.98449743  | -3.26191068 |
| 8         | 2.50175476  | -4.09530258 | -0.28111067 | 1  | -1.32684529 | 1.60719740  | -1.55051064 |
| 8         | -1.25474524 | -0.28190264 | -0.10251068 | 1  | 4.02775478  | -5.10330296 | -1.28001070 |
| 6         | 3.64075470  | -4.97860289 | -0.26701069 | 8  | 2.17805457  | 0.95949745  | -1.12331069 |
| 1         | 3.27445459  | -5.93050289 | 0.11468932  | 6  | 2.12025476  | 1.70069742  | -0.07751068 |
| 1         | 4.42205477  | -4.58990288 | 0.39098933  | 8  | 0.81875461  | 2.22139716  | 0.03658932  |
| 6         | -2.55504537 | -0.53690267 | -0.10161068 | 6  | 0.49185467  | 3.12589717  | 1.10698938  |
| 6         | -3.18054533 | -1.05020261 | 1.07948935  | 6  | 0.73275465  | 4.56669712  | 0.68308938  |
| 6         | -4.55804539 | -1.28680265 | 1.05728936  | 1  | 1.04665470  | 2.84579730  | 2.00868917  |
| 1         | -5.05384541 | -1.67320263 | 1.94188941  | 1  | -0.56904536 | 2.95649719  | 1.30168939  |
| 6         | -5.33034515 | -1.04310262 | -0.07391068 | 1  | 0.21805465  | 4.72199726  | -0.27211070 |
| 6         | -4.71354532 | -0.55640262 | -1.22181070 | 1  | 0.24155465  | 5.22229719  | 1.41298938  |
| 1         | -5.32954550 | -0.37730265 | -2.09701085 | 6  | 3.26295471  | 2.64349723  | 0.26228932  |
| 6         | -3.34064531 | -0.29710263 | -1.27411067 | 6  | 3.06725478  | 4.05399752  | -0.31811067 |
| 6         | -2.36714530 | -1.34930265 | 2.35278916  | 1  | 2.65355468  | 3.98479748  | -1.33051062 |
| 6         | -2.70534539 | 0.23069736  | -2.57411075 | 6  | 2.20435452  | 4.96749735  | 0.55968928  |
| 6         | -1.69914532 | -0.06530263 | 2.88518929  | 1  | 4.05675459  | 4.51389742  | -0.41931069 |
| 1         | -1.02834535 | 0.37779739  | 2.14868927  | 8  | 1.30345476  | -1.92600262 | -0.68101072 |
| 1         | -1.12234533 | -0.28140262 | 3.79388928  | 15 | 2.65205479  | -2.56170273 | -0.64241064 |
| 1         | -2.46054530 | 0.68029737  | 3.14118934  | 8  | 3.64385462  | -1.89550257 | 0.41308931  |
| 6         | -1.30774534 | -2.43280268 | 2.06278920  | 8  | 1.93635476  | 0.56909740  | 1.21878934  |
| 1         | -0.66124535 | -2.15890265 | 1.22788930  | 6  | 3.16825461  | -1.49430263 | 1.72918940  |
| 1         | -1.79274535 | -3.37970281 | 1.80138934  | 6  | 3.06815481  | 0.01509738  | 1.84258938  |
| 1         | -0.68594533 | -2.60890269 | 2.95098925  | 1  | 3.91585469  | -1.86940265 | 2.43338919  |
| 6         | -3.24324536 | -1.88980258 | 3.49668932  | 1  | 2.20775461  | -1.96840262 | 1.95198929  |
| 1         | -3.73804522 | -2.83030272 | 3.23238921  | 1  | 3.04335475  | 0.25189736  | 2.91808915  |
| 1         | -4.01024532 | -1.17160261 | 3.80568933  | 1  | 3.99555469  | 0.44159737  | 1.43908930  |
| 1         | -2.61204529 | -2.08850265 | 4.37068939  | 8  | 3.49285460  | -2.57520270 | -1.97701061 |
| 6         | -3.73604536 | 0.40349737  | -3.70391083 | 1  | -6.40074539 | -1.23460269 | -0.06221068 |
| 1         | -4.51204538 | 1.13269734  | -3.44811082 | 1  | 2.25455475  | 5.98859739  | 0.16338933  |
| 1         | -4.22354507 | -0.54060262 | -3.96931076 | 1  | 2.65305471  | 5.01059723  | 1.56198931  |
| 1         | -3.22724533 | 0.77129745  | -4.60241032 | 1  | 3.39915466  | 2.71569729  | 1.34578931  |
| 6         | -1.65264535 | -0.76760268 | -3.09981084 | 1  | 4.16495466  | 2.18829727  | -0.15421069 |
| 1         | -0.89614540 | -1.00400257 | -2.34991074 | 6  | 3.63635468  | -1.39220262 | -2.81171083 |
| 1         | -1.15054536 | -0.36520264 | -3.98861074 | 1  | 2.84255481  | -1.40610266 | -3.55961084 |



|   |             |             |             |   |            |             |             |
|---|-------------|-------------|-------------|---|------------|-------------|-------------|
| 1 | -2.13024521 | -1.71280265 | -3.38051081 | 1 | 4.61065483 | -1.48320258 | -3.29031086 |
| 6 | -2.07574534 | 1.61949742  | -2.34281087 | 1 | 3.57415462 | -0.47800264 | -2.22021079 |
| 1 | -2.84884524 | 2.34099722  | -2.05541062 |   |            |             |             |

## I-2\_PC

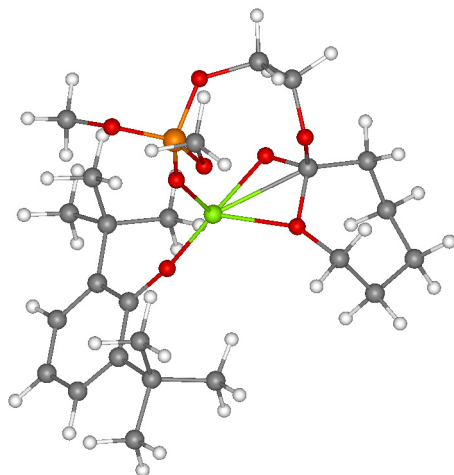

|                                              |                             |
|----------------------------------------------|-----------------------------|
| Zero-point vibrational energy                | 1678490.5 (Joules/Mol)      |
|                                              | 401.16885 (Kcal/Mol)        |
| Zero-point correction=                       | 0.639303 (Hartree/Particle) |
| Thermal correction to Energy=                | 0.678320                    |
| Thermal correction to Enthalpy=              | 0.679264                    |
| Thermal correction to Gibbs Free Energy=     | 0.565282                    |
| Sum of electronic and zero-point Energies=   | -2081.501711                |
| Sum of electronic and thermal Energies=      | -2081.462694                |
| Sum of electronic and thermal Enthalpies=    | -2081.461749                |
| Sum of electronic and thermal Free Energies= | -2081.575732                |

| cartesian |             |             |             |   |             |             |             |
|-----------|-------------|-------------|-------------|---|-------------|-------------|-------------|
| 12        | -0.42749742 | 0.09922667  | 0.37556538  | 1 | 1.72230256  | 0.69012666  | 3.91556525  |
| 8         | -3.29609728 | -2.16277337 | -1.72723460 | 1 | 1.46440256  | 1.06872678  | 2.20546532  |
| 8         | 1.39050257  | -0.03817332 | 0.09696537  | 1 | -3.76929736 | -4.00827312 | -2.56813478 |
| 6         | -4.26499748 | -3.08267331 | -2.27173471 | 8 | -1.60419738 | 0.90922672  | 1.71946537  |
| 1         | -4.68979740 | -2.58597350 | -3.14283466 | 6 | -2.42499733 | 1.51502669  | 0.88166535  |
| 1         | -5.05329752 | -3.29797339 | -1.54573464 | 8 | -1.66289747 | 1.61202669  | -0.38103464 |
| 6         | 2.69020271  | -0.28937334 | 0.00016536  | 6 | -2.12739730 | 2.42792654  | -1.46593463 |
| 6         | 3.32950258  | -0.25037333 | -1.27913463 | 6 | -1.52459741 | 3.82312655  | -1.38873458 |
| 6         | 4.69920254  | -0.52097332 | -1.34793460 | 1 | -3.22229743 | 2.44062662  | -1.45963454 |
| 1         | 5.20760250  | -0.49797332 | -2.30643463 | 1 | -1.80779743 | 1.92302668  | -2.38163471 |
| 6         | 5.44920254  | -0.82237333 | -0.21583465 | 1 | -0.43629742 | 3.71092653  | -1.32333457 |
| 6         | 4.82040262  | -0.85497332 | 1.02446544  | 1 | -1.72689748 | 4.33532667  | -2.33863473 |
| 1         | 5.42270231  | -1.08807325 | 1.89646542  | 6 | -2.95279741 | 2.87922668  | 1.34116542  |

|   |            |             |             |    |             |             |             |
|---|------------|-------------|-------------|----|-------------|-------------|-------------|
| 6 | 3.45410275 | -0.59627330 | 1.17026544  | 6  | -1.97419739 | 4.04442692  | 1.15966535  |
| 6 | 2.54200268 | 0.08192669  | -2.55993462 | 1  | -0.95639741 | 3.71132660  | 1.39316535  |
| 6 | 2.80410266 | -0.64347333 | 2.56526518  | 6  | -2.03289747 | 4.68722677  | -0.23203464 |
| 6 | 1.92320263 | 1.49112678  | -2.45733476 | 1  | -2.21849728 | 4.81862688  | 1.89626539  |
| 1 | 1.27900255 | 1.58502674  | -1.58213460 | 8  | -1.37069750 | -1.58727324 | -0.17203465 |
| 1 | 1.33410251 | 1.71772671  | -3.35543466 | 15 | -2.58259726 | -2.43467331 | -0.34083462 |
| 1 | 2.71120262 | 2.24752665  | -2.37293482 | 8  | -3.67189741 | -2.35527349 | 0.80966532  |
| 6 | 1.44760251 | -0.97627336 | -2.80733466 | 8  | -3.55359721 | 0.67342669  | 0.47216538  |
| 1 | 0.76430261 | -1.06327331 | -1.96193457 | 6  | -4.70159769 | -1.34217334 | 0.98076534  |
| 1 | 1.90140259 | -1.96047330 | -2.96953464 | 6  | -4.18479729 | -0.02877332 | 1.51996541  |
| 1 | 0.86320257 | -0.72457331 | -3.70183468 | 1  | -5.39999771 | -1.79577327 | 1.68686545  |
| 6 | 3.43520260 | 0.08882667  | -3.81323481 | 1  | -5.20719767 | -1.18737328 | 0.02316536  |
| 1 | 3.89300275 | -0.88797337 | -4.00313425 | 1  | -5.05269766 | 0.53142667  | 1.90506542  |
| 1 | 4.23270226 | 0.83652669  | -3.74863482 | 1  | -3.48669744 | -0.20557332 | 2.34526539  |
| 1 | 2.82500267 | 0.33752668  | -4.68913460 | 8  | -2.24069738 | -3.98467350 | -0.37473464 |
| 6 | 3.81640267 | -0.98137331 | 3.67436528  | 1  | 6.51390266  | -1.02747333 | -0.29903463 |
| 1 | 4.61110258 | -0.23177332 | 3.75096536  | 1  | -1.45169747 | 5.61712694  | -0.22003464 |
| 1 | 4.28100252 | -1.96257329 | 3.52986526  | 1  | -3.07189727 | 4.98432684  | -0.43293464 |
| 1 | 3.29800272 | -1.00507331 | 4.63976574  | 1  | -3.89669728 | 3.10302663  | 0.83106536  |
| 6 | 1.72790253 | -1.74817324 | 2.61736536  | 1  | -3.18619728 | 2.74692655  | 2.40216517  |
| 1 | 0.98830259 | -1.63997328 | 1.82136536  | 6  | -1.23199737 | -4.54067326 | 0.49976537  |
| 1 | 1.20380259 | -1.73527324 | 3.58086538  | 1  | -0.30769742 | -3.96677351 | 0.42106536  |
| 1 | 2.19200277 | -2.73357344 | 2.49626517  | 1  | -1.07159746 | -5.56107330 | 0.15536535  |
| 6 | 2.20410275 | 0.72982669  | 2.93116522  | 1  | -1.59449744 | -4.54737329 | 1.52986538  |
| 1 | 2.99520278 | 1.48652673  | 2.97236538  |    |             |             |             |

### TS-24\_PC

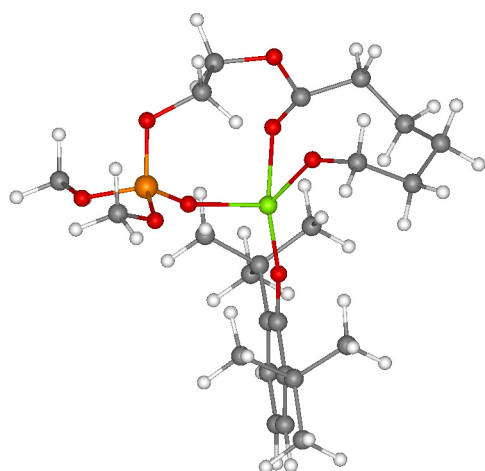

Zero-point vibrational energy

1675248.8 (Joules/Mol)

400.39407 (Kcal/Mol)

Zero-point correction=

0.638069 (Hartree/Particle)

|                                              |              |
|----------------------------------------------|--------------|
| Thermal correction to Energy=                | 0.677002     |
| Thermal correction to Enthalpy=              | 0.677946     |
| Thermal correction to Gibbs Free Energy=     | 0.564773     |
| Sum of electronic and zero-point Energies=   | -2081.499104 |
| Sum of electronic and thermal Energies=      | -2081.460171 |
| Sum of electronic and thermal Enthalpies=    | -2081.459227 |
| Sum of electronic and thermal Free Energies= | -2081.572400 |

| cartesian |             |             |             |    |             |             |             |  |  |  |  |
|-----------|-------------|-------------|-------------|----|-------------|-------------|-------------|--|--|--|--|
| 12        | 0.61558270  | 0.32051325  | -0.11976940 | 1  | -1.62871718 | 2.48651338  | -2.94996929 |  |  |  |  |
| 8         | 2.89808273  | -2.95788670 | 1.01483059  | 1  | -1.42471719 | 1.94921327  | -1.27486944 |  |  |  |  |
| 8         | -1.19951725 | -0.05128676 | -0.02806940 | 1  | 3.76618290  | -4.83858681 | 0.77983063  |  |  |  |  |
| 6         | 3.92308283  | -3.91898680 | 1.34623063  | 8  | 1.50598264  | 1.61641335  | -1.40606940 |  |  |  |  |
| 1         | 3.81438279  | -4.11128664 | 2.41223073  | 6  | 2.33538270  | 2.27121329  | -0.71386939 |  |  |  |  |
| 1         | 4.91398239  | -3.50798678 | 1.13973057  | 8  | 1.87588263  | 1.33391333  | 0.98663056  |  |  |  |  |
| 6         | -2.46261716 | -0.44718677 | -0.14106940 | 6  | 2.06528282  | 1.87341332  | 2.26953053  |  |  |  |  |
| 6         | -3.09381723 | -1.14538670 | 0.93803060  | 6  | 0.96608275  | 2.85101342  | 2.67533064  |  |  |  |  |
| 6         | -4.43031740 | -1.52958679 | 0.79513061  | 1  | 3.04838276  | 2.37311339  | 2.31533051  |  |  |  |  |
| 1         | -4.92991734 | -2.05448675 | 1.60253060  | 1  | 2.10248280  | 1.05521321  | 3.00623059  |  |  |  |  |
| 6         | -5.15711737 | -1.26118684 | -0.35966939 | 1  | 0.00128272  | 2.34081340  | 2.56643057  |  |  |  |  |
| 6         | -4.53471756 | -0.59348679 | -1.40856934 | 1  | 1.07608271  | 3.07411337  | 3.74553061  |  |  |  |  |
| 1         | -5.11491728 | -0.39508677 | -2.30376935 | 6  | 2.13478279  | 3.71971321  | -0.34016940 |  |  |  |  |
| 6         | -3.20221710 | -0.17638676 | -1.33716941 | 6  | 0.83108270  | 4.08741283  | 0.37613058  |  |  |  |  |
| 6         | -2.33401728 | -1.48688674 | 2.23303056  | 1  | 0.03088272  | 3.40161324  | 0.07793060  |  |  |  |  |
| 6         | -2.56541729 | 0.55711323  | -2.53146935 | 6  | 0.93448275  | 4.17301321  | 1.90553057  |  |  |  |  |
| 6         | -1.83011723 | -0.20328675 | 2.92073059  | 1  | 0.52308273  | 5.07401323  | 0.01193060  |  |  |  |  |
| 1         | -1.17451715 | 0.36811322  | 2.26353073  | 8  | 1.61178279  | -1.41388679 | -0.51806939 |  |  |  |  |
| 1         | -1.28001738 | -0.44788677 | 3.83833051  | 15 | 2.79398274  | -2.31188679 | -0.42176938 |  |  |  |  |
| 1         | -2.67261720 | 0.44131327  | 3.19453073  | 8  | 4.17928267  | -1.59058666 | -0.75106937 |  |  |  |  |
| 6         | -1.15631723 | -2.43198681 | 1.92133069  | 8  | 3.67608285  | 2.02021337  | -0.82706940 |  |  |  |  |
| 1         | -0.48191726 | -2.00968671 | 1.17533064  | 6  | 4.37558270  | -0.22418675 | -0.27576941 |  |  |  |  |
| 1         | -1.52811718 | -3.38518667 | 1.52883065  | 6  | 4.05628252  | 0.76751322  | -1.39416933 |  |  |  |  |
| 1         | -0.57941729 | -2.64368677 | 2.83053064  | 1  | 5.41928244  | -0.17668675 | 0.03783061  |  |  |  |  |
| 6         | -3.21891713 | -2.21328664 | 3.26213050  | 1  | 3.72808290  | -0.01028675 | 0.57793063  |  |  |  |  |
| 1         | -3.59351730 | -3.17208672 | 2.88783073  | 1  | 4.93048239  | 0.96761328  | -2.01746941 |  |  |  |  |
| 1         | -4.07591724 | -1.60668683 | 3.57433057  | 1  | 3.25098276  | 0.38251323  | -2.02266955 |  |  |  |  |
| 1         | -2.62581730 | -2.42488670 | 4.15933037  | 8  | 2.79068279  | -3.55468678 | -1.40026939 |  |  |  |  |
| 6         | -3.54551721 | 0.74111325  | -3.70396948 | 1  | -6.19651747 | -1.57008672 | -0.44166940 |  |  |  |  |
| 1         | -4.41461754 | 1.34661317  | -3.42556930 | 1  | 0.07688272  | 4.75161314  | 2.27033067  |  |  |  |  |
| 1         | -3.90461707 | -0.21428676 | -4.10116959 | 1  | 1.82338262  | 4.76611328  | 2.16303062  |  |  |  |  |
| 1         | -3.03401732 | 1.26231313  | -4.52136946 | 1  | 3.00488281  | 4.05751324  | 0.22923060  |  |  |  |  |

|   |             |             |             |   |            |             |             |
|---|-------------|-------------|-------------|---|------------|-------------|-------------|
| 6 | -1.38051724 | -0.25928676 | -3.08876944 | 1 | 2.18378282 | 4.23661327  | -1.30786943 |
| 1 | -0.65221727 | -0.50748676 | -2.31526947 | 6 | 2.51688290 | -3.37928677 | -2.81006932 |
| 1 | -0.86511725 | 0.29511324  | -3.88256931 | 1 | 1.55888271 | -2.87498665 | -2.94526935 |
| 1 | -1.74101710 | -1.20418668 | -3.51106930 | 1 | 2.47368288 | -4.38278675 | -3.22976947 |
| 6 | -2.11911726 | 1.97261333  | -2.11446929 | 1 | 3.32398272 | -2.81268668 | -3.27926946 |
| 1 | -2.98881721 | 2.56641340  | -1.81226933 |   |            |             |             |

#### I-4\_PC

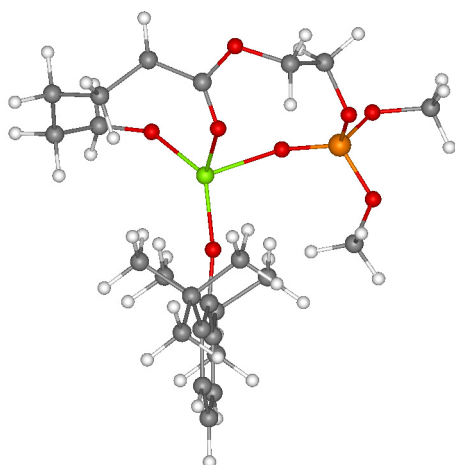

|                                              |                             |
|----------------------------------------------|-----------------------------|
| Zero-point vibrational energy                | 1677306.1 (Joules/Mol)      |
|                                              | 400.88577 (Kcal/Mol)        |
| Zero-point correction=                       | 0.638852 (Hartree/Particle) |
| Thermal correction to Energy=                | 0.678429                    |
| Thermal correction to Enthalpy=              | 0.679373                    |
| Thermal correction to Gibbs Free Energy=     | 0.566976                    |
| Sum of electronic and zero-point Energies=   | -2081.499513                |
| Sum of electronic and thermal Energies=      | -2081.459937                |
| Sum of electronic and thermal Enthalpies=    | -2081.458993                |
| Sum of electronic and thermal Free Energies= | -2081.571389                |

|    |             |             |             | cartesian |             |             |             |
|----|-------------|-------------|-------------|-----------|-------------|-------------|-------------|
| 12 | 0.69860518  | 0.29152530  | 0.82502133  | 1         | -1.23529482 | -2.70487452 | 3.03842115  |
| 8  | 3.16020513  | -3.54417467 | 1.05952132  | 1         | -0.66229486 | -2.07047462 | 1.49072134  |
| 8  | -0.94459474 | -0.15427467 | 0.02382131  | 1         | 2.85140514  | -5.50627470 | 0.42962131  |
| 6  | 3.67540503  | -4.81377506 | 0.60882133  | 8         | 2.09390521  | 0.84802526  | -0.68377870 |
| 1  | 4.30720520  | -5.18157482 | 1.41592133  | 6         | 3.10620499  | 1.53802538  | -0.55757868 |
| 1  | 4.26830530  | -4.69097471 | -0.30117869 | 8         | 1.26910520  | 1.49112535  | 2.11752129  |
| 6  | -2.22559500 | -0.33477467 | -0.28277868 | 6         | 0.99940515  | 2.54722548  | 2.97312117  |
| 6  | -2.72709489 | 0.11842531  | -1.54727864 | 6         | 0.62310517  | 3.85462546  | 2.26392126  |
| 6  | -4.04739475 | -0.18707469 | -1.89197862 | 1         | 1.87580526  | 2.74832535  | 3.62092113  |
| 1  | -4.44259501 | 0.12942532  | -2.85157871 | 1         | 0.17260519  | 2.30392528  | 3.66502118  |

|   |             |             |             |    |             |             |             |
|---|-------------|-------------|-------------|----|-------------|-------------|-------------|
| 6 | -4.89129496 | -0.88577467 | -1.03607869 | 1  | -0.27009478 | 3.67012548  | 1.65062141  |
| 6 | -4.41989470 | -1.26067472 | 0.21702132  | 1  | 0.32100520  | 4.57712507  | 3.03592134  |
| 1 | -5.10359478 | -1.77267480 | 0.88552129  | 6  | 3.21660519  | 2.74042535  | 0.31662130  |
| 6 | -3.11099482 | -0.99437469 | 0.63192129  | 6  | 2.09280515  | 3.77212548  | 0.10952131  |
| 6 | -1.86659467 | 0.96402532  | -2.50617886 | 1  | 1.20740521  | 3.27542543  | -0.29677871 |
| 6 | -2.67239499 | -1.38777471 | 2.05642128  | 6  | 1.69730520  | 4.52412510  | 1.39212132  |
| 6 | -0.63229477 | 0.18032533  | -2.99217868 | 1  | 2.42190504  | 4.48802519  | -0.65297872 |
| 1 | 0.01450518  | -0.09877469 | -2.16097879 | 8  | 1.76260519  | -1.46887469 | 0.88052130  |
| 1 | -0.04609481 | 0.78812534  | -3.69367886 | 15 | 2.30410504  | -2.61517453 | 0.10522132  |
| 1 | -0.94239473 | -0.73077470 | -3.51737881 | 8  | 3.24450517  | -2.18207479 | -1.12117863 |
| 6 | -1.42919481 | 2.26272535  | -1.80007863 | 8  | 4.24460506  | 1.19022536  | -1.17247868 |
| 1 | -0.88769484 | 2.05132532  | -0.87687868 | 6  | 4.34290504  | -1.26247478 | -0.92677867 |
| 1 | -2.30279493 | 2.87142539  | -1.54327869 | 6  | 4.23010540  | -0.06757468 | -1.88097858 |
| 1 | -0.78099477 | 2.85892534  | -2.45467877 | 1  | 5.25310516  | -1.83287477 | -1.12497866 |
| 6 | -2.63849497 | 1.38942528  | -3.76767874 | 1  | 4.37980509  | -0.91067469 | 0.10742132  |
| 1 | -3.52729487 | 1.98292542  | -3.52997875 | 1  | 5.09670496  | -0.00397468 | -2.53857875 |
| 1 | -2.94949484 | 0.53192532  | -4.37457848 | 1  | 3.32170510  | -0.15367469 | -2.47877884 |
| 1 | -1.98919475 | 2.01202536  | -4.39377832 | 8  | 1.28290522  | -3.60197473 | -0.57257867 |
| 6 | -3.81739473 | -2.01877475 | 2.86992121  | 1  | -5.91199493 | -1.11477470 | -1.33287859 |
| 1 | -4.17539501 | -2.95557451 | 2.42932129  | 1  | 1.31550527  | 5.50902510  | 1.09602141  |
| 1 | -4.67029476 | -1.34117460 | 2.98172116  | 1  | 2.59420514  | 4.72452497  | 1.99512136  |
| 1 | -3.45389485 | -2.25297451 | 3.87682128  | 6  | 0.20890519  | -3.13547468 | -1.43917859 |
| 6 | -2.23069501 | -0.13507468 | 2.84082127  | 1  | -0.29179481 | -2.27257466 | -0.99687868 |
| 1 | -1.42239475 | 0.40912533  | 2.34962130  | 1  | -0.48249480 | -3.97197461 | -1.51947868 |
| 1 | -1.88819468 | -0.41067469 | 3.84552121  | 1  | 0.62400520  | -2.88957453 | -2.41777873 |
| 1 | -3.07089496 | 0.55932534  | 2.94872117  | 1  | 4.21030521  | 3.18322539  | 0.21762133  |
| 6 | -1.54219472 | -2.43437457 | 2.02062130  | 1  | 3.09900498  | 2.31212544  | 1.32302141  |
| 1 | -1.88449466 | -3.34737468 | 1.51972139  |    |             |             |             |

### TS-45\_PC

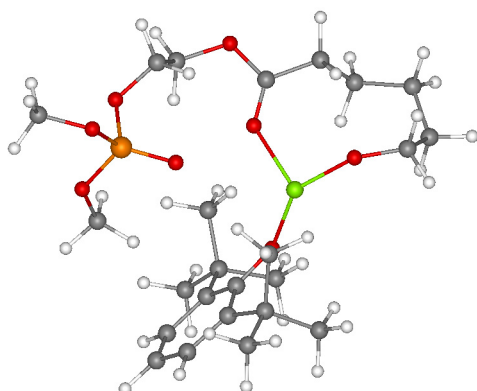

Zero-point vibrational energy

1675725.9 (Joules/Mol)

400.50810 (Kcal/Mol)

|                                              |                             |
|----------------------------------------------|-----------------------------|
| Zero-point correction=                       | 0.638250 (Hartree/Particle) |
| Thermal correction to Energy=                | 0.677414                    |
| Thermal correction to Enthalpy=              | 0.678358                    |
| Thermal correction to Gibbs Free Energy=     | 0.564735                    |
| Sum of electronic and zero-point Energies=   | -2081.478881                |
| Sum of electronic and thermal Energies=      | -2081.439717                |
| Sum of electronic and thermal Enthalpies=    | -2081.438773                |
| Sum of electronic and thermal Free Energies= | -2081.552396                |

| cartesian |             |             |             |    |             |             |             |
|-----------|-------------|-------------|-------------|----|-------------|-------------|-------------|
| 12        | 1.30094266  | -0.24956931 | 0.86555600  | 1  | 0.77594268  | 0.52253067  | 2.87405610  |
| 8         | -4.13595724 | -3.14476943 | 1.41965604  | 1  | -0.80465734 | 0.12683070  | 2.05235600  |
| 8         | 0.74014258  | 1.35163069  | 0.08955602  | 1  | -6.01725769 | -2.86286926 | 0.56745601  |
| 6         | -5.34535742 | -3.67586923 | 0.84965605  | 8  | 0.86504269  | -1.81116939 | -0.40254396 |
| 1         | -5.80265760 | -4.28476954 | 1.62905598  | 6  | 1.45164263  | -2.87006927 | -0.65394396 |
| 1         | -5.12075758 | -4.29726934 | -0.02154398 | 8  | 2.71184254  | -0.97906935 | 1.78455603  |
| 6         | -0.31835741 | 2.14493060  | -0.04924398 | 6  | 4.02994251  | -1.01886928 | 2.21215606  |
| 6         | -0.70805740 | 2.59443069  | -1.34964395 | 6  | 5.05804253  | -0.89226937 | 1.08115602  |
| 6         | -1.87475741 | 3.35753059  | -1.46284401 | 1  | 4.22734261  | -1.96226931 | 2.75715613  |
| 1         | -2.20035744 | 3.70293069  | -2.43884397 | 1  | 4.23864269  | -0.21126932 | 2.93625593  |
| 6         | -2.64145756 | 3.70473075  | -0.35334396 | 1  | 4.86704254  | 0.05023068  | 0.54835600  |
| 6         | -2.21095753 | 3.32633066  | 0.91515601  | 1  | 6.05124235  | -0.78866935 | 1.54045606  |
| 1         | -2.79825759 | 3.64013076  | 1.77195597  | 6  | 2.84214258  | -3.18476939 | -0.21034399 |
| 6         | -1.04935741 | 2.57063055  | 1.10245597  | 6  | 3.89394236  | -2.23746920 | -0.82804400 |
| 6         | 0.14684260  | 2.28763056  | -2.59344387 | 1  | 3.44404244  | -1.26036930 | -1.03254402 |
| 6         | -0.51855743 | 2.28453064  | 2.51975608  | 6  | 5.13504267  | -2.03646922 | 0.05845602  |
| 6         | 0.17394260  | 0.77383065  | -2.88054395 | 1  | 4.19154263  | -2.64626932 | -1.80044401 |
| 1         | 0.56354260  | 0.21543068  | -2.02924395 | 8  | -1.98185742 | -1.77106929 | 1.35105598  |
| 1         | 0.80454266  | 0.56103063  | -3.75334406 | 15 | -3.12205744 | -2.27136922 | 0.55855602  |
| 1         | -0.83515739 | 0.40593067  | -3.10194397 | 8  | -2.67425752 | -3.20896935 | -0.69104397 |
| 6         | 1.58424258  | 2.80863070  | -2.38514400 | 8  | 0.84774268  | -3.83136940 | -1.34904397 |
| 1         | 2.05174255  | 2.35093069  | -1.51244402 | 6  | -1.45905733 | -3.96706939 | -0.57384396 |
| 1         | 1.57914269  | 3.89433050  | -2.23934388 | 6  | -0.52955741 | -3.58546925 | -1.72564399 |
| 1         | 2.19814253  | 2.59113073  | -3.26824403 | 1  | -1.72235739 | -5.02736950 | -0.60214400 |
| 6         | -0.39775741 | 2.97243071  | -3.85874391 | 1  | -0.96735740 | -3.74846935 | 0.37665603  |
| 1         | -0.43355739 | 4.06213045  | -3.75584388 | 1  | -0.68715739 | -4.19916916 | -2.61214399 |
| 1         | -1.39955735 | 2.61933064  | -4.12754440 | 1  | -0.66105735 | -2.53276944 | -1.97384405 |
| 1         | 0.26224259  | 2.74583054  | -4.70364428 | 8  | -4.08885717 | -1.22696936 | -0.14674398 |
| 6         | -1.48745739 | 2.78453064  | 3.60625601  | 1  | -3.54885745 | 4.29183054  | -0.47364396 |
| 1         | -2.45855737 | 2.28013062  | 3.55495596  | 1  | 5.98744249  | -1.83256936 | -0.60104400 |
| 1         | -1.65375733 | 3.86453056  | 3.54595613  | 1  | 5.37704229  | -2.97796941 | 0.57045603  |

|   |             |            |            |   |             |             |             |
|---|-------------|------------|------------|---|-------------|-------------|-------------|
| 1 | -1.05995739 | 2.57943058 | 4.59375572 | 6 | -3.53825760 | -0.11536932 | -0.89584398 |
| 6 | 0.80934262  | 3.04953074 | 2.71095610 | 1 | -2.86305737 | 0.47253069  | -0.27294397 |
| 1 | 1.54934263  | 2.75353074 | 1.96325600 | 1 | -4.39055729 | 0.49333069  | -1.19204402 |
| 1 | 1.22604263  | 2.85573077 | 3.70715594 | 1 | -3.01975751 | -0.48606932 | -1.78254402 |
| 1 | 0.64594257  | 4.12803078 | 2.61605597 | 1 | 3.07244253  | -4.22986937 | -0.42824399 |
| 6 | -0.29365739 | 0.76633060 | 2.78265595 | 1 | 2.82704258  | -3.02116942 | 0.87265605  |
| 1 | -0.71105742 | 0.46173069 | 3.74795604 |   |             |             |             |

## I-5\_PC

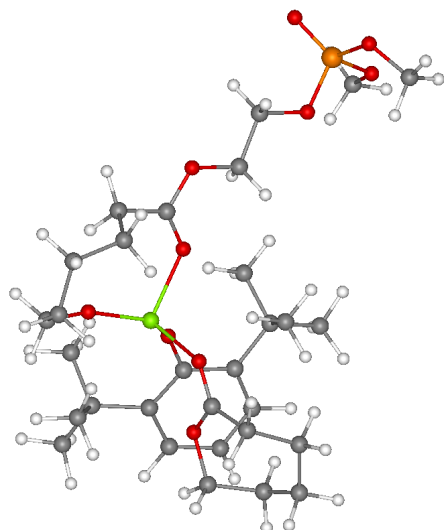

|                                              |                             |
|----------------------------------------------|-----------------------------|
| Zero-point vibrational energy                | 2091309.6 (Joules/Mol)      |
|                                              | 499.83499 (Kcal/Mol)        |
| Zero-point correction=                       | 0.796538 (Hartree/Particle) |
| Thermal correction to Energy=                | 0.846224                    |
| Thermal correction to Enthalpy=              | 0.847169                    |
| Thermal correction to Gibbs Free Energy=     | 0.704841                    |
| Sum of electronic and zero-point Energies=   | -2466.366023                |
| Sum of electronic and thermal Energies=      | -2466.316337                |
| Sum of electronic and thermal Enthalpies=    | -2466.315392                |
| Sum of electronic and thermal Free Energies= | -2466.457719                |

## cartesian

|   |            |             |             |   |             |             |            |
|---|------------|-------------|-------------|---|-------------|-------------|------------|
| 8 | 8.20359135 | -0.16865267 | -0.95956987 | 6 | -1.30060852 | -2.62235260 | 0.76143008 |
| 6 | 7.89339161 | -0.79575270 | -2.21596980 | 6 | -3.76970816 | -0.23085265 | 2.60673022 |
| 1 | 8.53209114 | -0.31695265 | -2.95786977 | 6 | 0.19319150  | -2.72135258 | 0.39363009 |
| 1 | 6.84279156 | -0.64115268 | -2.47646976 | 6 | -4.09580851 | 0.97574735  | 1.70623004 |
| 1 | 8.11269093 | -1.86435258 | -2.16776991 | 1 | -3.20800829 | 1.43124735  | 1.26633000 |
| 8 | 1.23279142 | 1.57554734  | 0.27893010  | 1 | -4.58810854 | 1.76024735  | 2.29403019 |
| 6 | 1.98279154 | 2.53424740  | 0.48623008  | 1 | -4.77850819 | 0.68764734  | 0.89893013 |

|    |             |             |             |   |             |             |             |
|----|-------------|-------------|-------------|---|-------------|-------------|-------------|
| 8  | -1.29560852 | 3.10914731  | 0.94553012  | 6 | -2.77720833 | 0.19174734  | 3.71053028  |
| 6  | -1.89000857 | 4.35414743  | 0.97843009  | 1 | -1.81020844 | 0.47624731  | 3.29553008  |
| 6  | -1.50310862 | 5.26074743  | -0.19816990 | 1 | -2.61760855 | -0.63165265 | 4.41573000  |
| 1  | -1.63490856 | 4.88604736  | 1.91703010  | 1 | -3.17750835 | 1.04524732  | 4.27083015  |
| 1  | -2.99360847 | 4.27514744  | 0.97993010  | 6 | -5.08320856 | -0.60235268 | 3.32173014  |
| 1  | -1.77510846 | 4.74664736  | -1.13106990 | 1 | -4.96370840 | -1.46795261 | 3.98163009  |
| 1  | -2.12730837 | 6.16474724  | -0.14826991 | 1 | -5.89920855 | -0.81285268 | 2.62113023  |
| 6  | 1.52409148  | 3.93294740  | 0.74143010  | 1 | -5.40410852 | 0.24224734  | 3.94143009  |
| 6  | 0.99099147  | 4.59434748  | -0.55026990 | 6 | 0.62779152  | -4.17085266 | 0.10993010  |
| 1  | 0.53079152  | 3.83494735  | -1.19057000 | 1 | 0.13469151  | -4.59365273 | -0.77256989 |
| 6  | -0.03670853 | 5.70814753  | -0.28666991 | 1 | 0.43409151  | -4.83275270 | 0.96043009  |
| 1  | 1.84569144  | 4.99804735  | -1.10596991 | 1 | 1.70639145  | -4.19165277 | -0.08446990 |
| 8  | 7.86989164  | 0.19724734  | 1.55993009  | 6 | 1.05669141  | -2.22455263 | 1.57173002  |
| 15 | 7.36879158  | -0.48895270 | 0.35853010  | 1 | 0.82399154  | -1.18995261 | 1.82553005  |
| 8  | 5.82269144  | -0.15505266 | -0.00276990 | 1 | 2.12219143  | -2.29795265 | 1.31633008  |
| 8  | 3.30449152  | 2.37944746  | 0.47913009  | 1 | 0.88139153  | -2.84255266 | 2.45923018  |
| 6  | 5.31519175  | 1.15864742  | 0.28593010  | 6 | 0.51629150  | -1.90845263 | -0.87336987 |
| 6  | 3.80409145  | 1.04774737  | 0.23003009  | 1 | -0.06500852 | -2.28125262 | -1.72536993 |
| 1  | 5.67639160  | 1.87074733  | -0.46316987 | 1 | 1.57929146  | -2.00285268 | -1.13056993 |
| 1  | 5.65119171  | 1.48384738  | 1.27373004  | 1 | 0.29639149  | -0.84975266 | -0.74146986 |
| 1  | 3.46179152  | 0.70524734  | -0.74896991 | 8 | -1.18410850 | 1.22854733  | -1.67386997 |
| 1  | 3.42379141  | 0.36344731  | 0.99103010  | 6 | -2.11140871 | 0.64044732  | -2.23866987 |
| 8  | 7.34019184  | -2.08705258 | 0.35233009  | 8 | -3.01320839 | 0.05054734  | -1.47816992 |
| 1  | 0.04089150  | 6.43604755  | -1.10416996 | 6 | -4.11640835 | -0.73175269 | -2.00486994 |
| 1  | 0.23959148  | 6.25714731  | 0.62413013  | 6 | -3.68110847 | -1.97675252 | -2.75746989 |
| 6  | 6.77039146  | -2.77985263 | 1.48003006  | 1 | -4.75380850 | -0.07715267 | -2.61086988 |
| 1  | 7.23789167  | -2.44315267 | 2.40753007  | 1 | -4.65680838 | -1.00685263 | -1.09986997 |
| 1  | 6.97719145  | -3.83765268 | 1.32063007  | 1 | -2.91560841 | -2.48665261 | -2.16246986 |
| 1  | 5.69039154  | -2.61655259 | 1.51723003  | 1 | -4.54720831 | -2.64835262 | -2.77466989 |
| 1  | 2.34039164  | 4.51794720  | 1.17133009  | 6 | -2.20850849 | 0.59554732  | -3.74026990 |
| 1  | 0.69599152  | 3.84544730  | 1.45063007  | 6 | -2.00300837 | -0.81185269 | -4.32916975 |
| 12 | -0.85670853 | 1.40324736  | 0.39643008  | 1 | -1.11920846 | -1.26975262 | -3.87136984 |
| 8  | -1.17310846 | -0.27815264 | 1.20213008  | 6 | -3.21430874 | -1.73365259 | -4.19266987 |
| 6  | -1.87510860 | -1.39885259 | 1.24533010  | 1 | -1.76940858 | -0.68985265 | -5.39216995 |
| 6  | -3.19500828 | -1.42185259 | 1.80983007  | 1 | -4.06220818 | -4.63325262 | 0.98493010  |
| 6  | -3.95270824 | -2.59045267 | 1.67423010  | 1 | -2.97700834 | -2.69695258 | -4.65736961 |
| 1  | -4.96520853 | -2.62275267 | 2.06313014  | 1 | -4.04700851 | -1.31255257 | -4.77276993 |
| 6  | -3.44650841 | -3.74135256 | 1.07583010  | 1 | -3.18460846 | 0.98974735  | -4.04906988 |
| 6  | -2.11670828 | -3.75425267 | 0.66573012  | 1 | -1.44310856 | 1.27944744  | -4.10926962 |
| 1  | -1.71130860 | -4.68195248 | 0.27433008  |   |             |             |             |



## S1.7. LL sequence, mononuclear mechanism

### I-1\_LL

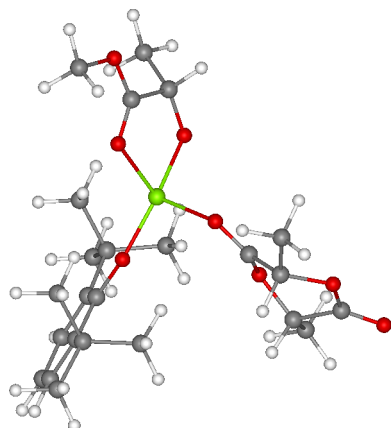

|                                              |                             |
|----------------------------------------------|-----------------------------|
| Zero-point vibrational energy                | 1512976.3 (Joules/Mol)      |
|                                              | 361.61000 (Kcal/Mol)        |
| Zero-point correction=                       | 0.576262 (Hartree/Particle) |
| Thermal correction to Energy=                | 0.614223                    |
| Thermal correction to Enthalpy=              | 0.615167                    |
| Thermal correction to Gibbs Free Energy=     | 0.501162                    |
| Sum of electronic and zero-point Energies=   | -1737.213316                |
| Sum of electronic and thermal Energies=      | -1737.175356                |
| Sum of electronic and thermal Enthalpies=    | -1737.174412                |
| Sum of electronic and thermal Free Energies= | -1737.288417                |

| cartesian |             |             |             |   |             |             |             |
|-----------|-------------|-------------|-------------|---|-------------|-------------|-------------|
| 8         | -1.82028842 | -1.42980576 | -0.37500733 | 6 | 2.51421142  | 3.28749442  | 0.97629267  |
| 6         | -4.08538818 | -0.72760570 | -0.80200732 | 1 | 3.08151150  | 3.63079429  | 1.83519268  |
| 6         | -2.77188849 | -0.73690581 | -0.04470732 | 6 | 1.97221160  | 1.99879420  | 0.97329271  |
| 8         | -2.68808842 | 0.06179425  | 1.00569272  | 6 | 0.31601161  | 2.02799439  | -2.55650735 |
| 6         | -3.75938845 | 1.02419424  | 1.22529268  | 6 | 2.20821142  | 1.06499422  | 2.17359281  |
| 6         | -5.11728811 | 0.34599426  | 1.08219266  | 6 | -1.15778840 | 1.73399425  | -2.21140718 |
| 8         | -5.19058800 | -0.59640574 | 0.11149268  | 1 | -1.21068835 | 0.96799421  | -1.43750727 |
| 8         | -6.07348824 | 0.60819423  | 1.76349270  | 1 | -1.70028830 | 1.38729417  | -3.10110736 |
| 1         | -4.06098843 | 0.15589425  | -1.45670736 | 1 | -1.65028834 | 2.64259434  | -1.84450734 |
| 6         | -4.30638838 | -1.97620583 | -1.62900734 | 6 | 0.97441155  | 0.78309429  | -3.18550730 |
| 6         | -3.54348850 | 1.64609420  | 2.58539271  | 1 | 1.00001168  | -0.05480576 | -2.48850727 |
| 1         | -3.67138839 | 1.78609419  | 0.44019267  | 1 | 2.00471163  | 1.00819421  | -3.48150730 |
| 1         | -4.31448841 | 2.39659429  | 2.76449275  | 1 | 0.42651159  | 0.47379425  | -4.08480740 |
| 1         | -2.56168842 | 2.12099433  | 2.61929274  | 6 | 0.30811161  | 3.12069440  | -3.63940740 |
| 1         | -3.60718846 | 0.88919425  | 3.36919260  | 1 | 1.31841159  | 3.37749434  | -3.97480726 |

|    |             |             |             |   |             |             |             |
|----|-------------|-------------|-------------|---|-------------|-------------|-------------|
| 1  | -5.26028824 | -1.89660573 | -2.15340734 | 1 | -0.18618840 | 4.03859425  | -3.30320740 |
| 1  | -4.32318830 | -2.86170578 | -0.99090731 | 1 | -0.24198841 | 2.75639439  | -4.51480722 |
| 1  | -3.50318837 | -2.08330584 | -2.35910726 | 6 | 3.00371146  | -0.17810576 | 1.71959269  |
| 12 | 0.20461160  | -1.38890576 | 0.23319268  | 1 | 4.01781178  | 0.11619425  | 1.42799270  |
| 8  | 0.31901157  | -2.77470565 | 1.53379273  | 1 | 2.56121159  | -0.67010576 | 0.85109270  |
| 6  | 0.78061157  | -3.98930573 | 1.10319269  | 1 | 3.07691145  | -0.91330576 | 2.52829266  |
| 6  | 1.10891151  | -3.92460561 | -0.39080733 | 6 | 0.86821157  | 0.67949426  | 2.83549261  |
| 8  | 1.53521156  | -5.04500580 | -0.95240736 | 1 | 0.43321157  | 1.55649424  | 3.32829261  |
| 6  | 1.83911157  | -4.98810577 | -2.36100721 | 1 | 1.01021171  | -0.10120575 | 3.59039259  |
| 6  | 2.00851154  | -4.48020601 | 1.89059269  | 1 | 0.12741160  | 0.32659426  | 2.11599278  |
| 8  | 0.96821159  | -2.87980556 | -1.04350734 | 6 | 3.05221152  | 1.72069418  | 3.28139281  |
| 1  | 0.94731158  | -4.71810579 | -2.92910719 | 1 | 2.56741142  | 2.60769439  | 3.70259261  |
| 1  | 2.17421150  | -5.98990583 | -2.62380719 | 1 | 4.04821157  | 2.00709438  | 2.92849278  |
| 1  | 2.62631154  | -4.25610590 | -2.54820728 | 1 | 3.18911147  | 1.00429416  | 4.09939289  |
| 8  | 0.65741158  | 0.36919424  | -0.20930734 | 1 | 2.78901148  | 5.15489388  | -0.06650732 |
| 6  | 1.22191167  | 1.57289422  | -0.16980731 | 1 | 0.00891158  | -4.78360605 | 1.17799270  |
| 6  | 1.07661152  | 2.45619440  | -1.28770733 | 1 | 2.34371161  | -5.47050571 | 1.56739271  |
| 6  | 1.64811158  | 3.72979426  | -1.21440732 | 1 | 1.73031163  | -4.52560568 | 2.94609261  |
| 1  | 1.54701161  | 4.41549397  | -2.04890728 | 1 | 2.83421159  | -3.76940560 | 1.79029274  |
| 6  | 2.35671163  | 4.15769386  | -0.09670732 |   |             |             |             |

## I-2\_LL

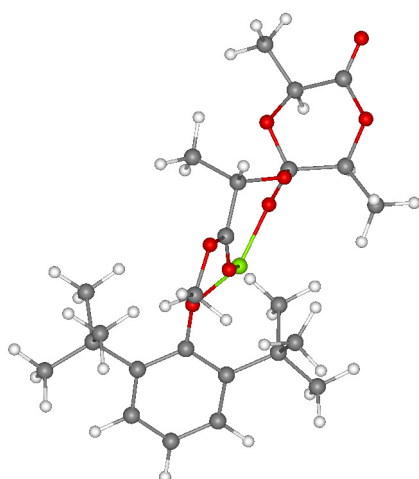

|                                            |                             |
|--------------------------------------------|-----------------------------|
| Zero-point vibrational energy              | 1519322.5 (Joules/Mol)      |
|                                            | 363.12680 (Kcal/Mol)        |
| Zero-point correction=                     | 0.578679 (Hartree/Particle) |
| Thermal correction to Energy=              | 0.615067                    |
| Thermal correction to Enthalpy=            | 0.616012                    |
| Thermal correction to Gibbs Free Energy=   | 0.509377                    |
| Sum of electronic and zero-point Energies= | -1737.186784                |
| Sum of electronic and thermal Energies=    | -1737.150396                |

Sum of electronic and thermal Enthalpies= -1737.149452  
Sum of electronic and thermal Free Energies= -1737.256087

| cartesian |             |             |             |   |             |             |             |
|-----------|-------------|-------------|-------------|---|-------------|-------------|-------------|
| 8         | 1.68072319  | -0.92900151 | 0.78145951  | 1 | -1.16517687 | -1.06760144 | -1.80194044 |
| 8         | 3.71452332  | -0.45760149 | 1.74355936  | 1 | -1.47927678 | -2.70270157 | -2.28234053 |
| 6         | 3.00292301  | -1.06420159 | 0.64155942  | 1 | -0.28067678 | -2.47430158 | -1.02984047 |
| 6         | 3.39162302  | -2.57170153 | 0.54245943  | 6 | -3.13907671 | -3.51940179 | -0.63954055 |
| 8         | 4.78822327  | -2.81200147 | 0.87885946  | 1 | -3.60397673 | -3.49170136 | -1.63504052 |
| 6         | 5.20462322  | -2.31710148 | 2.08185935  | 1 | -3.92207670 | -3.72410178 | 0.10275948  |
| 6         | 4.19232321  | -1.37650156 | 2.74175930  | 1 | -2.43477678 | -4.36450148 | -0.61974055 |
| 8         | 6.29982328  | -2.59860158 | 2.51685929  | 6 | -2.00287676 | 3.26999831  | -0.94664049 |
| 12        | 0.23452324  | -0.27520150 | -0.21554053 | 1 | -2.46717691 | 3.27319837  | -1.94414043 |
| 8         | 3.55882311  | -0.46140152 | -0.57244051 | 1 | -1.16867685 | 2.55939841  | -0.95164055 |
| 6         | 3.43082333  | 0.92609847  | -0.86044049 | 1 | -1.60817683 | 4.27979851  | -0.75234056 |
| 6         | 2.28232336  | 1.15609848  | -1.84844065 | 6 | -2.39887667 | 2.95949841  | 1.53815937  |
| 8         | 2.62232304  | 1.96529841  | -2.84554052 | 1 | -3.15027666 | 2.75529838  | 2.31465936  |
| 6         | 1.56442320  | 2.30869842  | -3.79224062 | 1 | -1.99137676 | 3.96659851  | 1.71875930  |
| 6         | 3.28392315  | 1.92779851  | 0.29855949  | 1 | -1.59067678 | 2.22679853  | 1.63855934  |
| 8         | 1.13822317  | 0.68159848  | -1.76524043 | 6 | -4.14617682 | 3.96819854  | 0.08995944  |
| 1         | 1.21722317  | 1.40299845  | -4.30164051 | 1 | -4.91777658 | 3.79959846  | 0.85455948  |
| 1         | 2.03402328  | 3.00039840  | -4.49574041 | 1 | -4.63737679 | 4.01919842  | -0.89254057 |
| 1         | 0.72982323  | 2.78309846  | -3.26384068 | 1 | -3.69507694 | 4.95179844  | 0.28705949  |
| 8         | -1.43447673 | 0.49279848  | 0.10385948  | 1 | -6.57137680 | -0.10180151 | -0.79714054 |
| 6         | -2.74117661 | 0.33089849  | -0.12514052 | 1 | 4.34862328  | 1.18509853  | -1.41044044 |
| 6         | -3.29097700 | -0.97170156 | -0.36134052 | 1 | 3.21202326  | 2.94339848  | -0.11694053 |
| 6         | -4.66507673 | -1.09570146 | -0.60054052 | 1 | 4.16542339  | 1.86959839  | 0.94385952  |
| 1         | -5.09657669 | -2.07930160 | -0.78174055 | 1 | 2.40032339  | 1.72349846  | 0.91385943  |
| 6         | -5.50367689 | 0.01569849  | -0.60974056 | 1 | 2.76392317  | -3.07350159 | 1.29625940  |
| 6         | -4.96567678 | 1.28069854  | -0.37354052 | 6 | 3.16312313  | -3.20170140 | -0.81914055 |
| 1         | -5.63657665 | 2.13809848  | -0.38074052 | 6 | 4.80512333  | -0.57290155 | 3.87335920  |
| 6         | -3.60107660 | 1.47659850  | -0.12934053 | 1 | 3.35042334  | -1.98140168 | 3.13435936  |
| 6         | -2.38217688 | -2.21470165 | -0.32294053 | 1 | 5.18762350  | -1.24970150 | 4.64665937  |
| 6         | -3.04467678 | 2.89189839  | 0.13395947  | 1 | 4.04612350  | 0.08639848  | 4.31285954  |
| 6         | -1.79437673 | -2.39170146 | 1.10115957  | 1 | 5.64272356  | 0.03179848  | 3.50405931  |
| 1         | -1.30827677 | -1.48350167 | 1.48225951  | 1 | 3.34422302  | -4.28260136 | -0.76334053 |
| 1         | -1.07127678 | -3.22140145 | 1.12965941  | 1 | 3.83812332  | -2.76230168 | -1.56164050 |
| 1         | -2.60547686 | -2.62610149 | 1.80395937  | 1 | 2.12652302  | -3.03990149 | -1.14234054 |
| 6         | -1.25307679 | -2.09040165 | -1.39864051 |   |             |             |             |

## TS-13\_LL

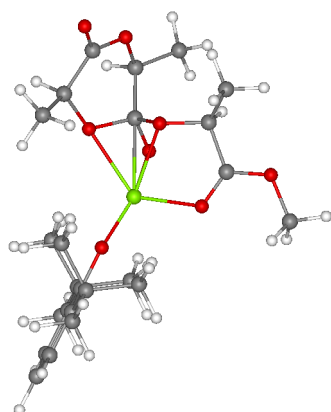

|                                              |                             |
|----------------------------------------------|-----------------------------|
| Zero-point vibrational energy                | 1516662.9 (Joules/Mol)      |
|                                              | 362.49112 (Kcal/Mol)        |
| Zero-point correction=                       | 0.577666 (Hartree/Particle) |
| Thermal correction to Energy=                | 0.613556                    |
| Thermal correction to Enthalpy=              | 0.614501                    |
| Thermal correction to Gibbs Free Energy=     | 0.509629                    |
| Sum of electronic and zero-point Energies=   | -1737.195133                |
| Sum of electronic and thermal Energies=      | -1737.159243                |
| Sum of electronic and thermal Enthalpies=    | -1737.158299                |
| Sum of electronic and thermal Free Energies= | -1737.263170                |

| cartesian |             |             |             |   |             |             |             |
|-----------|-------------|-------------|-------------|---|-------------|-------------|-------------|
| 12        | 0.55945081  | -0.22443183 | -0.48413911 | 1 | -1.20244908 | 2.31796837  | -0.02063915 |
| 8         | -1.18204927 | -0.04123183 | 0.08546085  | 8 | 2.04645085  | -1.38383186 | -1.26863921 |
| 6         | -2.50364923 | -0.20773183 | 0.12726085  | 6 | 2.72085094  | -1.14363182 | -0.19213915 |
| 6         | -3.12154913 | -1.31283188 | -0.53753918 | 8 | 1.92725086  | -1.48793185 | 0.95546085  |
| 6         | -4.51064920 | -1.44993186 | -0.45463914 | 8 | 0.94885081  | 1.47736812  | -1.61273921 |
| 1         | -5.00154924 | -2.28253174 | -0.94753915 | 8 | 2.73565078  | 0.39586818  | 0.05676085  |
| 6         | -5.29794931 | -0.54503185 | 0.24816084  | 6 | 2.11335087  | 1.86696815  | -1.71133912 |
| 6         | -4.68884897 | 0.53176814  | 0.88446081  | 6 | 3.27125096  | 1.21646821  | -0.96553916 |
| 1         | -5.31914902 | 1.22986817  | 1.42526078  | 1 | 3.76575089  | 0.60426813  | -1.72953916 |
| 6         | -3.30624914 | 0.73296815  | 0.84416085  | 1 | -6.37604904 | -0.67623186 | 0.29866087  |
| 6         | -2.29164910 | -2.33863163 | -1.32983911 | 8 | 2.46535087  | 2.86076832  | -2.50003910 |
| 6         | -2.68134904 | 1.94776821  | 1.55476081  | 6 | 1.40905070  | 3.47706819  | -3.27603912 |
| 6         | -1.56914926 | -1.64733183 | -2.50813913 | 1 | 1.89795089  | 4.26616812  | -3.84293914 |
| 1         | -1.06634927 | -0.72093183 | -2.21653914 | 1 | 0.64965081  | 3.88706827  | -2.60983896 |
| 1         | -0.83404917 | -2.31543183 | -2.97103906 | 1 | 0.95925081  | 2.73976827  | -3.94203901 |
| 1         | -2.29554915 | -1.35733187 | -3.27473903 | 6 | 4.11945057  | -1.73833179 | -0.00333915 |
| 6         | -1.30094910 | -3.06533170 | -0.39523914 | 6 | 2.56245089  | -1.47563183 | 2.25166106  |
| 1         | -0.68334919 | -2.38263178 | 0.19036084  | 6 | 3.99655080  | -0.93793184 | 2.25066090  |

|   |             |             |             |   |            |             |             |
|---|-------------|-------------|-------------|---|------------|-------------|-------------|
| 1 | -1.85324907 | -3.67873168 | 0.32496086  | 1 | 2.65325093 | -2.52903175 | 2.55466104  |
| 1 | -0.63734919 | -3.72613168 | -0.96483916 | 1 | 3.93595099 | -2.80313182 | 0.19276084  |
| 6 | -3.15744901 | -3.44303179 | -1.96303916 | 8 | 4.75095081 | -1.15613186 | 1.14926088  |
| 1 | -3.69124889 | -4.03053188 | -1.20923913 | 8 | 4.48645067 | -0.41073185 | 3.21986103  |
| 1 | -3.89054918 | -3.04243183 | -2.67063904 | 6 | 4.25495052 | 2.22126818  | -0.37543914 |
| 1 | -2.51134920 | -4.13363171 | -2.51723909 | 1 | 3.75795078 | 2.85326838  | 0.36466086  |
| 6 | -3.73324919 | 2.81686831  | 2.26536083  | 1 | 4.68485069 | 2.85586834  | -1.15313911 |
| 1 | -4.46974897 | 3.23186827  | 1.56886089  | 1 | 5.05575085 | 1.67586815  | 0.12766086  |
| 1 | -4.26934910 | 2.26616836  | 3.04566097  | 6 | 1.68325090 | -0.74143183 | 3.24426103  |
| 1 | -3.23254919 | 3.66246819  | 2.75026107  | 1 | 1.62975073 | 0.32086819  | 2.99716091  |
| 6 | -1.68394923 | 1.48676813  | 2.63586092  | 1 | 2.09275079 | -0.84043187 | 4.25086117  |
| 1 | -0.88424915 | 0.88366818  | 2.20556092  | 1 | 0.67685080 | -1.16493189 | 3.22376084  |
| 1 | -1.23714924 | 2.35286832  | 3.14036083  | 6 | 5.07745075 | -1.62523186 | -1.17143917 |
| 1 | -2.19294906 | 0.88216817  | 3.39466095  | 1 | 5.93655109 | -2.27963161 | -1.00403917 |
| 6 | -1.97404909 | 2.85816836  | 0.52956080  | 1 | 5.45905066 | -0.60883182 | -1.28653920 |
| 1 | -2.69604921 | 3.24886823  | -0.19653915 | 1 | 4.57245111 | -1.93433189 | -2.08903909 |
| 1 | -1.50974917 | 3.71406817  | 1.03626084  |   |            |             |             |

### I-3\_LL

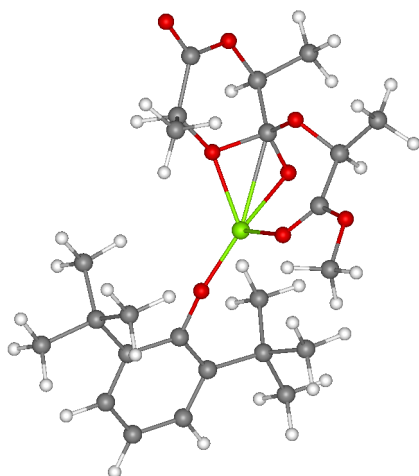

|                                              |                             |
|----------------------------------------------|-----------------------------|
| Zero-point vibrational energy                | 1516772.9 (Joules/Mol)      |
|                                              | 362.51742 (Kcal/Mol)        |
| Zero-point correction=                       | 0.577708 (Hartree/Particle) |
| Thermal correction to Energy=                | 0.613538                    |
| Thermal correction to Enthalpy=              | 0.614483                    |
| Thermal correction to Gibbs Free Energy=     | 0.510079                    |
| Sum of electronic and zero-point Energies=   | -1737.206633                |
| Sum of electronic and thermal Energies=      | -1737.170803                |
| Sum of electronic and thermal Enthalpies=    | -1737.169858                |
| Sum of electronic and thermal Free Energies= | -1737.274262                |

cartesian

|   |             |             |             |    |             |             |             |
|---|-------------|-------------|-------------|----|-------------|-------------|-------------|
| 8 | -1.33347368 | 0.07431158  | 0.19583914  | 8  | 3.69382644  | -0.51208842 | -0.04446086 |
| 6 | -2.66207361 | 0.14941159  | 0.25663912  | 6  | 3.44652629  | -1.59208834 | -0.92736083 |
| 6 | -3.43087363 | -0.98608845 | 0.65563911  | 1  | 3.03482628  | -2.43718839 | -0.35866088 |
| 6 | -4.82317400 | -0.86098844 | 0.69903910  | 6  | 2.34162641  | -1.24128830 | -1.93046093 |
| 1 | -5.43317366 | -1.70678830 | 0.99783915  | 12 | 0.44522631  | -0.32718843 | 0.24103914  |
| 6 | -5.46627378 | 0.32691157  | 0.36993915  | 1  | -6.55037403 | 0.39561158  | 0.41393912  |
| 6 | -4.70667410 | 1.42661166  | -0.01496086 | 8  | 2.61642647  | -1.56128836 | -3.17886090 |
| 1 | -5.22637367 | 2.34501171  | -0.26596087 | 8  | 1.25602627  | -0.73918843 | -1.62196076 |
| 6 | -3.31157351 | 1.37481165  | -0.08416086 | 6  | 1.58122635  | -1.31308842 | -4.16006088 |
| 6 | -2.76367354 | -2.31968832 | 1.04103911  | 1  | 2.00112629  | -1.65028834 | -5.10506105 |
| 6 | -2.51157355 | 2.61621165  | -0.52126086 | 1  | 1.34892631  | -0.24828842 | -4.19376087 |
| 6 | -1.97097373 | -2.89628839 | -0.15126087 | 1  | 0.68402636  | -1.87898839 | -3.90686083 |
| 1 | -1.25557375 | -2.17998838 | -0.56286085 | 6  | 4.76792622  | -1.97788835 | -1.57246077 |
| 1 | -1.42807364 | -3.80178833 | 0.14593914  | 8  | 1.88202643  | -1.27858841 | 1.20323920  |
| 1 | -2.65217352 | -3.16278839 | -0.96666092 | 6  | 3.61932635  | -0.04278841 | 2.31713915  |
| 6 | -1.85627365 | -2.13428831 | 2.27463913  | 6  | 2.79542637  | -0.34618843 | 1.06843913  |
| 1 | -1.09337378 | -1.36688840 | 2.12993908  | 8  | 2.03042626  | 0.91241157  | 0.78933913  |
| 1 | -2.45327353 | -1.82828832 | 3.14003921  | 6  | 2.75132632  | 2.14741158  | 0.65783912  |
| 1 | -1.34887362 | -3.07268834 | 2.52823925  | 6  | 4.10972643  | 2.14861155  | 1.36363924  |
| 6 | -3.79097342 | -3.39958835 | 1.42773914  | 8  | 4.48382616  | 1.10051167  | 2.11663914  |
| 1 | -4.38557386 | -3.11108828 | 2.30063915  | 8  | 4.83982611  | 3.10751176  | 1.25713921  |
| 1 | -4.47597408 | -3.63328838 | 0.60613912  | 1  | 2.89842629  | 0.21001159  | 3.10143924  |
| 1 | -3.26337361 | -4.32488823 | 1.68563914  | 6  | 4.49602604  | -1.19428837 | 2.75583911  |
| 6 | -3.42037368 | 3.81881166  | -0.83186090 | 6  | 2.89102626  | 2.57441163  | -0.79786086 |
| 1 | -4.11377382 | 3.61281157  | -1.65396082 | 1  | 2.15222621  | 2.89251161  | 1.19273913  |
| 1 | -4.00297403 | 4.13431168  | 0.03993914  | 1  | 4.64552593  | -2.83698845 | -2.23486090 |
| 1 | -2.80087352 | 4.67061186  | -1.13486087 | 1  | 5.47472620  | -2.24138832 | -0.78326088 |
| 6 | -1.55787373 | 3.06781173  | 0.60423911  | 1  | 5.18532610  | -1.14848840 | -2.14736080 |
| 1 | -0.86737365 | 2.27361155  | 0.89273912  | 1  | 3.34542632  | 3.56561160  | -0.84586090 |
| 1 | -0.97467369 | 3.94091153  | 0.28483915  | 1  | 1.90232635  | 2.61471152  | -1.26206076 |
| 1 | -2.12667370 | 3.35321164  | 1.49573922  | 1  | 3.52082634  | 1.87321162  | -1.34866083 |
| 6 | -1.72307372 | 2.31721163  | -1.81316078 | 1  | 5.02012634  | -0.93288845 | 3.67823911  |
| 1 | -2.41047359 | 2.07421160  | -2.63096070 | 1  | 5.23772621  | -1.42438841 | 1.98773921  |
| 1 | -1.13777375 | 3.19451165  | -2.11646080 | 1  | 3.87602639  | -2.07458830 | 2.93883920  |
| 1 | -1.04567361 | 1.47101164  | -1.68736076 |    |             |             |             |

# TS-34\_LL

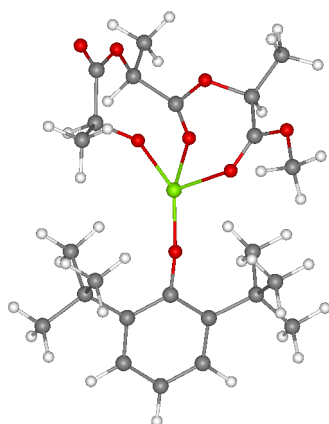

|                                              |                             |
|----------------------------------------------|-----------------------------|
| Zero-point vibrational energy                | 1514951.2 (Joules/Mol)      |
|                                              | 362.08202 (Kcal/Mol)        |
| Zero-point correction=                       | 0.577014 (Hartree/Particle) |
| Thermal correction to Energy=                | 0.613392                    |
| Thermal correction to Enthalpy=              | 0.614336                    |
| Thermal correction to Gibbs Free Energy=     | 0.508324                    |
| Sum of electronic and zero-point Energies=   | -1737.199817                |
| Sum of electronic and thermal Energies=      | -1737.163439                |
| Sum of electronic and thermal Enthalpies=    | -1737.162495                |
| Sum of electronic and thermal Free Energies= | -1737.268507                |

| cartesian |            |             |             |    |             |             |             |  |  |  |  |
|-----------|------------|-------------|-------------|----|-------------|-------------|-------------|--|--|--|--|
| 8         | 1.26826394 | -0.05315214 | -0.05739420 | 8  | -3.68013620 | 0.88504785  | 0.55160576  |  |  |  |  |
| 6         | 2.58456373 | -0.18795215 | 0.09410580  | 6  | -3.24133635 | 2.21564794  | 0.23200580  |  |  |  |  |
| 6         | 3.38156366 | 0.95354784  | 0.41810581  | 1  | -2.58113623 | 2.56694794  | 1.03400576  |  |  |  |  |
| 6         | 4.76086378 | 0.78064781  | 0.56680578  | 6  | -2.36623621 | 2.19434786  | -1.02399421 |  |  |  |  |
| 1         | 5.38826370 | 1.63024783  | 0.81420577  | 12 | -0.56503612 | -0.07875215 | -0.03229420 |  |  |  |  |
| 6         | 5.37016392 | -0.45895216 | 0.40680581  | 1  | 6.44556379  | -0.56375217 | 0.52790576  |  |  |  |  |
| 6         | 4.58706379 | -1.56245220 | 0.08760580  | 8  | -2.73893595 | 3.05654788  | -1.94759429 |  |  |  |  |
| 1         | 5.08016396 | -2.52055216 | -0.03659420 | 8  | -1.37443614 | 1.48174787  | -1.15599418 |  |  |  |  |
| 6         | 3.20176411 | -1.46565211 | -0.07589421 | 6  | -1.91713607 | 3.12424779  | -3.13869405 |  |  |  |  |
| 6         | 2.75876379 | 2.35044789  | 0.59910578  | 1  | -2.36933613 | 3.90234780  | -3.74949408 |  |  |  |  |
| 6         | 2.38176394 | -2.71875215 | -0.43529421 | 1  | -1.93693614 | 2.16324782  | -3.65359402 |  |  |  |  |
| 6         | 2.07536411 | 2.80294776  | -0.70749420 | 1  | -0.89243615 | 3.38134789  | -2.86949420 |  |  |  |  |
| 1         | 1.31106389 | 2.09444785  | -1.02929425 | 6  | -4.48283625 | 3.08064795  | 0.13110580  |  |  |  |  |
| 1         | 1.60986388 | 3.78834796  | -0.57239425 | 8  | -1.71163607 | 0.49254787  | 1.60730577  |  |  |  |  |
| 1         | 2.81346369 | 2.88834786  | -1.51279426 | 6  | -3.52913618 | -1.09925210 | 1.87480581  |  |  |  |  |
| 6         | 1.75256383 | 2.34754777  | 1.76790571  | 6  | -2.83013630 | 0.08004786  | 1.22260582  |  |  |  |  |
| 1         | 0.95436382 | 1.61854780  | 1.62440574  | 8  | -2.13533616 | -1.14905214 | -0.31199419 |  |  |  |  |
| 1         | 2.25916386 | 2.09914780  | 2.70670581  | 6  | -2.72793627 | -2.39915204 | -0.48979419 |  |  |  |  |

|   |            |             |             |   |             |             |             |
|---|------------|-------------|-------------|---|-------------|-------------|-------------|
| 1 | 1.29756391 | 3.33944774  | 1.88530576  | 6 | -4.21293592 | -2.33085227 | -0.10789420 |
| 6 | 3.81026363 | 3.42254782  | 0.93610579  | 8 | -4.53863621 | -1.65155220 | 1.03330576  |
| 1 | 4.33076382 | 3.21294785  | 1.87650573  | 8 | -5.10633612 | -2.84435225 | -0.73709422 |
| 1 | 4.55896378 | 3.53324795  | 0.14470580  | 1 | -2.74843597 | -1.83475220 | 2.08870578  |
| 1 | 3.31176376 | 4.39204788  | 1.05000579  | 6 | -4.20963621 | -0.67635214 | 3.17010593  |
| 6 | 3.26116371 | -3.97295213 | -0.58919424 | 6 | -2.57193613 | -2.90725207 | -1.91759419 |
| 1 | 4.00026369 | -3.86485219 | -1.38979423 | 1 | -2.28123617 | -3.14975214 | 0.19100580  |
| 1 | 3.78976393 | -4.22515202 | 0.33600581  | 1 | -4.21083593 | 4.11734772  | -0.07459420 |
| 1 | 2.62716389 | -4.82945204 | -0.84469426 | 1 | -5.01783609 | 3.04174781  | 1.08220577  |
| 6 | 1.37026393 | -3.04125214 | 0.68340576  | 1 | -5.14753628 | 2.72754788  | -0.65919423 |
| 1 | 0.70656383 | -2.20055223 | 0.89770579  | 1 | -3.02843618 | -3.89255214 | -2.03819418 |
| 1 | 0.75366390 | -3.90665221 | 0.41130581  | 1 | -1.50823617 | -2.97545218 | -2.15869403 |
| 1 | 1.89486396 | -3.27975225 | 1.61470580  | 1 | -3.05063629 | -2.21785212 | -2.61749411 |
| 6 | 1.66756380 | -2.52475214 | -1.78849423 | 1 | -4.64893627 | -1.55435216 | 3.64900589  |
| 1 | 2.40226364 | -2.37665224 | -2.58709407 | 1 | -5.00663614 | 0.04264786  | 2.96710587  |
| 1 | 1.07216382 | -3.41095209 | -2.03979421 | 1 | -3.48183632 | -0.23005214 | 3.85220599  |
| 1 | 1.01056385 | -1.65295219 | -1.78659427 |   |             |             |             |

#### I-4\_LL

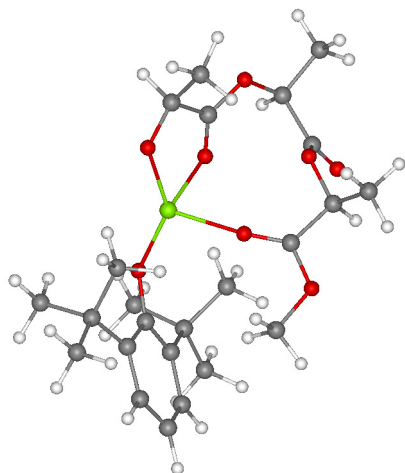

|                                              |                             |
|----------------------------------------------|-----------------------------|
| Zero-point vibrational energy                | 1516356.2 (Joules/Mol)      |
|                                              | 362.41784 (Kcal/Mol)        |
| Zero-point correction=                       | 0.577550 (Hartree/Particle) |
| Thermal correction to Energy=                | 0.614647                    |
| Thermal correction to Enthalpy=              | 0.615591                    |
| Thermal correction to Gibbs Free Energy=     | 0.507992                    |
| Sum of electronic and zero-point Energies=   | -1737.217347                |
| Sum of electronic and thermal Energies=      | -1737.180250                |
| Sum of electronic and thermal Enthalpies=    | -1737.179305                |
| Sum of electronic and thermal Free Energies= | -1737.286905                |



cartesian

|    |             |             |             |   |             |             |             |
|----|-------------|-------------|-------------|---|-------------|-------------|-------------|
| 12 | 0.34762606  | 1.18167973  | 0.69020432  | 1 | -1.43967390 | -0.89832032 | 3.06810427  |
| 8  | -1.29397392 | 0.41607967  | 1.19210422  | 8 | 1.32472610  | 2.80427980  | 0.90390432  |
| 6  | -2.31117392 | -0.13982034 | 0.53870434  | 6 | 3.87452602  | -1.26782024 | 0.00830429  |
| 6  | -3.21587396 | 0.68047965  | -0.20719571 | 6 | 4.57512617  | -0.55282032 | 1.16300428  |
| 6  | -4.19177389 | 0.05497966  | -0.98989564 | 8 | 4.29882574  | 0.86177963  | 1.20300424  |
| 1  | -4.87017393 | 0.65217966  | -1.59019578 | 6 | 3.01612592  | 1.20307970  | 1.30170429  |
| 6  | -4.33607388 | -1.32982028 | -1.01749575 | 6 | 2.66392589  | 2.68667960  | 1.17350423  |
| 6  | -3.52347398 | -2.11152029 | -0.20099571 | 8 | 3.77492595  | -2.47182035 | -0.02579571 |
| 1  | -3.68807411 | -3.18402028 | -0.19059572 | 6 | 3.54962587  | 3.38527966  | 0.13240428  |
| 6  | -2.51967406 | -1.55512023 | 0.59980434  | 1 | 2.92752600  | 3.11237979  | 2.16610432  |
| 6  | -3.17497396 | 2.21737981  | -0.09319571 | 1 | 4.19112587  | -1.02052033 | 2.07260442  |
| 6  | -1.69687390 | -2.45182037 | 1.54480422  | 6 | 6.08412600  | -0.71182036 | 1.06730425  |
| 6  | -3.47907400 | 2.61727977  | 1.36620426  | 8 | 3.45252609  | -0.42562035 | -0.96269566 |
| 1  | -2.76737404 | 2.15607977  | 2.05440426  | 6 | 2.72112608  | -0.99402040 | -2.05379558 |
| 1  | -3.42067409 | 3.70637965  | 1.48500431  | 6 | 1.26052606  | -0.55932033 | -1.95399570 |
| 1  | -4.48767424 | 2.29907966  | 1.65030420  | 8 | 0.53262603  | -1.16182029 | -2.87269568 |
| 6  | -1.80837381 | 2.81817961  | -0.50929570 | 6 | -0.88617384 | -0.84482032 | -2.91179562 |
| 1  | -1.13527393 | 2.94947982  | 0.34290430  | 6 | 3.35742593  | -0.53522032 | -3.36159563 |
| 1  | -1.31717396 | 2.22557974  | -1.29019570 | 1 | 2.74652600  | -2.08442020 | -1.97629583 |
| 1  | -1.93487394 | 3.82707977  | -0.91779566 | 8 | 0.81462610  | 0.25057966  | -1.15379572 |
| 6  | -4.24187422 | 2.88417983  | -0.98039573 | 1 | -1.01737392 | 0.21357965  | -3.13869572 |
| 1  | -4.07527399 | 2.69347978  | -2.04699564 | 1 | -1.28747392 | -1.46372032 | -3.71089554 |
| 1  | -5.25507402 | 2.55737972  | -0.72649568 | 1 | -1.35547388 | -1.08652031 | -1.95759571 |
| 1  | -4.20667410 | 3.96887970  | -0.83199567 | 1 | -5.10117388 | -1.79152024 | -1.63709569 |
| 6  | -2.21047401 | -3.90242028 | 1.55900431  | 8 | 2.13982606  | 0.34287965  | 1.44790423  |
| 1  | -3.26217413 | -3.96442032 | 1.85770428  | 1 | 4.61292601  | 3.33277965  | 0.38410428  |
| 1  | -2.09827399 | -4.39752007 | 0.58790433  | 1 | 3.24582601  | 4.43347979  | 0.08830429  |
| 1  | -1.62937391 | -4.48212051 | 2.28470445  | 1 | 3.39502597  | 2.94537973  | -0.85719568 |
| 6  | -0.21927392 | -2.51062036 | 1.11420429  | 1 | 6.55802584  | -0.25082034 | 1.93660426  |
| 1  | 0.25642607  | -1.53142023 | 1.17040431  | 1 | 6.47012615  | -0.23352034 | 0.16380429  |
| 1  | 0.34492606  | -3.18712020 | 1.76720428  | 1 | 6.33942604  | -1.77302027 | 1.04810429  |
| 1  | -0.12697393 | -2.88942027 | 0.08930429  | 1 | 2.81092596  | -0.94762033 | -4.21159554 |
| 6  | -1.80027401 | -1.92482030 | 2.99110436  | 1 | 4.38922596  | -0.89092034 | -3.40309572 |
| 1  | -2.84097409 | -1.94912028 | 3.33260441  | 1 | 3.36022592  | 0.55517966  | -3.43269563 |
| 1  | -1.20987391 | -2.55602026 | 3.66670442  |   |             |             |             |

I-5\_LL

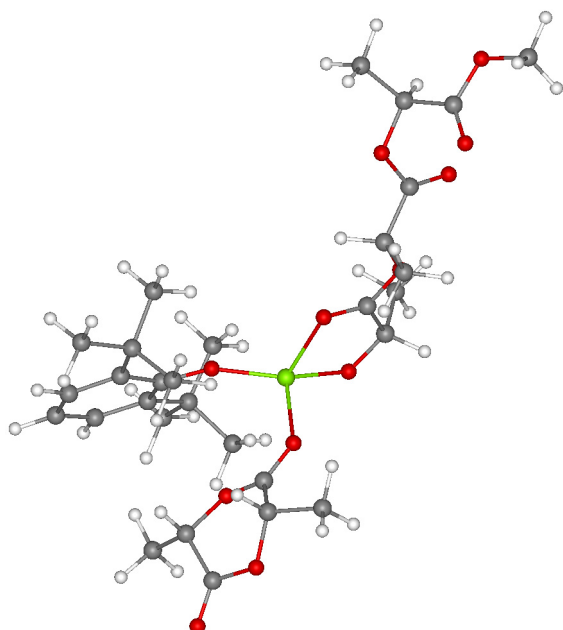

|                                              |                             |
|----------------------------------------------|-----------------------------|
| Zero-point vibrational energy                | 1887836.8 (Joules/Mol)      |
|                                              | 451.20383 (Kcal/Mol)        |
| Zero-point correction=                       | 0.719039 (Hartree/Particle) |
| Thermal correction to Energy=                | 0.768340                    |
| Thermal correction to Enthalpy=              | 0.769284                    |
| Thermal correction to Gibbs Free Energy=     | 0.629422                    |
| Sum of electronic and zero-point Energies=   | -2271.313314                |
| Sum of electronic and thermal Energies=      | -2271.264013                |
| Sum of electronic and thermal Enthalpies=    | -2271.263069                |
| Sum of electronic and thermal Free Energies= | -2271.402931                |

| cartesian |            |            |             |   |             |             |             |
|-----------|------------|------------|-------------|---|-------------|-------------|-------------|
| 8         | 1.41838157 | 2.05061722 | 0.95030344  | 6 | 0.54788154  | -1.51258278 | -2.69589663 |
| 6         | 2.62498140 | 3.85281730 | -0.09969656 | 1 | 0.18978155  | -1.49498272 | -1.66579652 |
| 6         | 2.48478174 | 2.47541714 | 0.51950347  | 1 | 0.69938153  | -2.55738282 | -2.98749661 |
| 8         | 3.57378149 | 1.73691726 | 0.57090342  | 1 | -0.23011847 | -1.09118295 | -3.34499645 |
| 6         | 4.74558163 | 2.18001723 | -0.17609654 | 6 | 2.25498152  | -0.78478283 | -4.33449697 |
| 6         | 5.01178122 | 3.65511727 | 0.09780344  | 1 | 2.42198133  | -1.81288266 | -4.67139673 |
| 8         | 3.90288162 | 4.42621708 | 0.22850345  | 1 | 3.15448141  | -0.20018283 | -4.55789661 |
| 8         | 6.11028147 | 4.13551712 | 0.19630346  | 1 | 1.44108152  | -0.37138283 | -4.94089699 |
| 1         | 2.57098150 | 3.70971727 | -1.18899655 | 6 | 2.07988167  | -3.20888281 | 1.93810344  |
| 6         | 1.54988158 | 4.82151699 | 0.34660345  | 1 | 2.10528135  | -4.16968298 | 1.41260350  |
| 6         | 5.89748144 | 1.27751708 | 0.19700345  | 1 | 1.24108148  | -2.63878274 | 1.53840351  |
| 1         | 4.50508165 | 2.06111717 | -1.23999655 | 1 | 1.88448155  | -3.40518284 | 2.99840355  |
| 1         | 6.77528143 | 1.56161714 | -0.38569653 | 6 | 3.47398138  | -1.18818283 | 2.60940337  |

---

|    |             |             |             |   |              |             |             |
|----|-------------|-------------|-------------|---|--------------|-------------|-------------|
| 1  | 5.63548136  | 0.24111716  | -0.02459656 | 1 | 4.49678135   | -0.79838282 | 2.65380335  |
| 1  | 6.13898134  | 1.37971711  | 1.25680351  | 1 | 3.13178158   | -1.37208295 | 3.63310337  |
| 1  | 1.70638156  | 5.78391743  | -0.14399655 | 1 | 2.86278152   | -0.38648283 | 2.19170356  |
| 1  | 1.58498156  | 4.96351719  | 1.42830348  | 6 | 4.49568129   | -3.41318274 | 2.36440349  |
| 1  | 0.56648153  | 4.43601704  | 0.07470345  | 1 | 5.49748135   | -2.97078276 | 2.35140347  |
| 12 | 0.69328153  | 0.09491716  | 1.29220343  | 1 | 4.53688145   | -4.37548256 | 1.84360349  |
| 8  | -0.04081847 | -0.01908283 | 3.03870344  | 1 | 4.24758148   | -3.61698270 | 3.41200352  |
| 6  | -1.40401852 | 0.05381717  | 3.14560342  | 1 | 6.01268148   | -2.81648278 | -2.14829659 |
| 6  | -2.02471852 | 0.28861716  | 1.76670349  | 1 | -1.73241842  | 0.92591715  | 3.74720335  |
| 8  | -3.34141827 | 0.42941716  | 1.73840344  | 1 | -3.11101866  | -1.11888289 | 3.89460349  |
| 6  | -3.97221851 | 0.63731718  | 0.45770347  | 1 | -1.57561851  | -1.32448292 | 4.77520323  |
| 6  | -2.02551842 | -1.19938278 | 3.78760338  | 1 | -1.78441846  | -2.08718276 | 3.19430351  |
| 8  | -1.32681847 | 0.34751716  | 0.74270344  | 8 | -5.80751848  | -0.26108283 | -0.68669653 |
| 6  | -4.06291866 | 2.12601709  | 0.14290345  | 8 | -5.98681879  | -0.16008282 | 1.57290351  |
| 6  | -5.36061859 | 0.02371716  | 0.55760342  | 6 | -7.17111874  | -0.69168282 | -0.77939653 |
| 1  | -3.40011835 | 0.11711717  | -0.31289655 | 6 | -8.09281826  | 0.50361717  | -0.54279655 |
| 8  | 1.65878153  | -0.89978284 | 0.03500345  | 1 | -7.37171841  | -1.43578291 | -0.00429656 |
| 6  | 2.73638153  | -1.44278288 | -0.51479656 | 6 | -7.36531878  | -1.28468275 | -2.16709661 |
| 6  | 2.94288158  | -1.31958294 | -1.92799664 | 8 | -9.35301781  | 0.08151717  | -0.35509652 |
| 6  | 4.13328123  | -1.80908275 | -2.47529650 | 8 | -7.74551868  | 1.66311717  | -0.55199653 |
| 1  | 4.31958151  | -1.71118283 | -3.53979659 | 6 | -10.32661819 | 1.11991715  | -0.14329655 |
| 6  | 5.09588146  | -2.44508266 | -1.69689655 | 1 | -11.27691841 | 0.60481715  | -0.01299655 |
| 6  | 4.84618139  | -2.64178276 | -0.34209657 | 1 | -10.36511803 | 1.78711724  | -1.00659657 |
| 1  | 5.58308125  | -3.18608284 | 0.23920345  | 1 | -10.07511806 | 1.69511724  | 0.74950343  |
| 6  | 3.68268156  | -2.17298269 | 0.27690345  | 1 | -4.61221838  | 2.27551723  | -0.78889656 |
| 6  | 1.86228156  | -0.71868283 | -2.84819651 | 1 | -3.05791855  | 2.53911734  | 0.03230345  |
| 6  | 3.42848158  | -2.47808266 | 1.76610351  | 1 | -4.58681870  | 2.65191722  | 0.94410348  |
| 6  | 1.61168158  | 0.76651716  | -2.52439642 | 1 | -8.39231777  | -1.63778281 | -2.27989650 |
| 1  | 1.27848148  | 0.88891715  | -1.49379659 | 1 | -6.68671846  | -2.12978268 | -2.30419660 |
| 1  | 0.84178156  | 1.18221712  | -3.18649650 | 1 | -7.15751839  | -0.54018283 | -2.93969655 |
| 1  | 2.52978134  | 1.34891725  | -2.67929649 |   |              |             |             |

---

## S1.8. LP sequence, mononuclear mechanism

### I-1\_LP

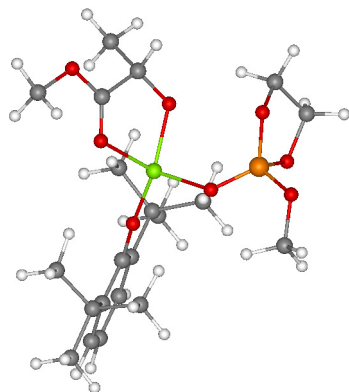

|                                              |                             |
|----------------------------------------------|-----------------------------|
| Zero-point vibrational energy                | 1445611.2 (Joules/Mol)      |
|                                              | 345.50936 (Kcal/Mol)        |
| Zero-point correction=                       | 0.550604 (Hartree/Particle) |
| Thermal correction to Energy=                | 0.587427                    |
| Thermal correction to Enthalpy=              | 0.588371                    |
| Thermal correction to Gibbs Free Energy=     | 0.477829                    |
| Sum of electronic and zero-point Energies=   | -1963.699849                |
| Sum of electronic and thermal Energies=      | -1963.663026                |
| Sum of electronic and thermal Enthalpies=    | -1963.662082                |
| Sum of electronic and thermal Free Energies= | -1963.772624                |

|    |             |             |             | cartesian |             |             |             |
|----|-------------|-------------|-------------|-----------|-------------|-------------|-------------|
| 12 | 0.92811191  | 0.39101970  | -0.07618640 | 1         | -1.11408806 | -2.71438026 | 2.30341363  |
| 8  | -0.90228808 | 0.10001969  | -0.06178640 | 1         | -0.01908806 | -1.70538032 | 3.26951361  |
| 6  | -2.18398809 | -0.21938032 | 0.06521360  | 1         | -0.10218808 | -1.51418030 | 1.50911355  |
| 6  | -3.04738808 | -0.16918030 | -1.07568634 | 1         | -5.96438789 | -1.14838028 | 0.42151362  |
| 6  | -4.39358807 | -0.50718033 | -0.90988642 | 8         | 1.86371195  | -1.04768026 | -1.18008637 |
| 1  | -5.06718779 | -0.47438031 | -1.75978637 | 15        | 3.02651191  | -1.92128038 | -0.84098643 |
| 6  | -4.91268778 | -0.89028031 | 0.32241359  | 8         | 4.42691231  | -1.25468028 | -0.47028640 |
| 6  | -4.06788778 | -0.93758035 | 1.42601359  | 8         | 2.79431176  | -2.76888037 | 0.50151360  |
| 1  | -4.48928785 | -1.23758030 | 2.37971377  | 6         | 4.63931227  | -1.36788034 | 0.96591353  |
| 6  | -2.71108818 | -0.61188030 | 1.33711362  | 6         | 3.95851183  | -2.67878032 | 1.35671353  |
| 6  | -2.52278805 | 0.24381970  | -2.46318626 | 1         | 5.71651220  | -1.37908030 | 1.13161361  |
| 6  | -1.82358801 | -0.67438030 | 2.59371376  | 1         | 4.15381193  | -0.51048028 | 1.43991363  |
| 6  | -1.43898797 | -0.74548030 | -2.93888640 | 8         | 3.39691186  | -2.88508034 | -2.03738642 |
| 1  | -0.61678803 | -0.82058030 | -2.22668624 | 6         | 2.39511180  | -3.30998039 | -2.99438620 |
| 1  | -1.03348804 | -0.43208033 | -3.90988636 | 1         | 2.94941187  | -3.66868043 | -3.85998631 |
| 1  | -1.86898792 | -1.74648035 | -3.06028628 | 1         | 1.75261199  | -2.47328043 | -3.26918626 |

|   |             |             |             |   |            |             |             |
|---|-------------|-------------|-------------|---|------------|-------------|-------------|
| 6 | -1.96728814 | 1.68211973  | -2.42318630 | 1 | 1.80231202 | -4.11998034 | -2.56528640 |
| 1 | -1.16818798 | 1.79021966  | -1.68988645 | 8 | 2.33631182 | 0.79961967  | 1.19131362  |
| 1 | -2.76278806 | 2.38791966  | -2.15868640 | 6 | 2.87881184 | 2.05871964  | 1.10821354  |
| 1 | -1.57658803 | 1.96911979  | -3.40798640 | 1 | 3.97911191 | 2.03371978  | 0.96721363  |
| 6 | -3.62488818 | 0.23121969  | -3.53718638 | 6 | 2.35121202 | 2.77191973  | -0.13758640 |
| 1 | -4.43258810 | 0.93591964  | -3.31228638 | 8 | 2.88281178 | 3.95451975  | -0.40198642 |
| 1 | -4.06398773 | -0.76328033 | -3.67198634 | 8 | 1.48101199 | 2.26711965  | -0.85828638 |
| 1 | -3.19228816 | 0.52861965  | -4.49948645 | 6 | 2.38501191 | 4.63951969  | -1.57078636 |
| 6 | -2.60338807 | -1.11628032 | 3.84511375  | 1 | 2.93421197 | 5.57841969  | -1.60898638 |
| 1 | -3.03188825 | -2.11838031 | 3.73621368  | 1 | 1.31381190 | 4.82141972  | -1.47298646 |
| 1 | -1.92118800 | -1.14478028 | 4.70251369  | 1 | 2.57461190 | 4.04401970  | -2.46528625 |
| 1 | -3.41178823 | -0.42118031 | 4.09561348  | 1 | 3.60811186 | -2.67588043 | 2.38861370  |
| 6 | -1.24828804 | 0.72061968  | 2.91301370  | 1 | 4.58951187 | -3.55278039 | 1.17251360  |
| 1 | -0.68558800 | 1.13281965  | 2.07471371  | 6 | 2.59981179 | 2.91971970  | 2.35341382  |
| 1 | -0.58108807 | 0.67341965  | 3.78221369  | 1 | 3.07161188 | 3.90521955  | 2.29241371  |
| 1 | -2.05988812 | 1.41961968  | 3.14371371  | 1 | 2.99321175 | 2.39081979  | 3.22491360  |
| 6 | -0.69398808 | -1.70768034 | 2.40471363  | 1 | 1.52221203 | 3.04351974  | 2.49661374  |

## TS-12\_LP

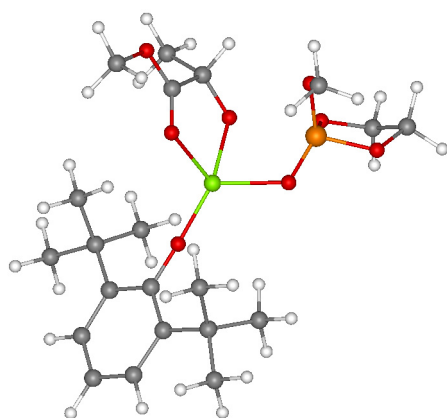

|                                              |                             |
|----------------------------------------------|-----------------------------|
| Zero-point vibrational energy                | 1446277.9 (Joules/Mol)      |
|                                              | 345.66872 (Kcal/Mol)        |
| Zero-point correction=                       | 0.550858 (Hartree/Particle) |
| Thermal correction to Energy=                | 0.586395                    |
| Thermal correction to Enthalpy=              | 0.587339                    |
| Thermal correction to Gibbs Free Energy=     | 0.481887                    |
| Sum of electronic and zero-point Energies=   | -1963.687541                |
| Sum of electronic and thermal Energies=      | -1963.652004                |
| Sum of electronic and thermal Enthalpies=    | -1963.651060                |
| Sum of electronic and thermal Free Energies= | -1963.756513                |

cartesian

|    |             |             |             |    |             |             |             |
|----|-------------|-------------|-------------|----|-------------|-------------|-------------|
| 12 | -0.70673352 | 0.03032728  | 0.13930909  | 1  | 2.65036654  | 3.06662726  | 0.20700909  |
| 8  | 1.09776652  | -0.24557272 | -0.09839091 | 1  | 1.44556653  | 3.53472733  | -1.00699091 |
| 6  | 2.41486645  | -0.41127270 | -0.15279092 | 1  | 1.15846658  | 2.13982725  | 0.05820908  |
| 6  | 3.02256656  | -1.54417276 | 0.47480911  | 8  | -2.00903344 | -1.50707269 | 0.06000908  |
| 6  | 4.41236639  | -1.67817271 | 0.40400910  | 15 | -3.36153340 | -1.15287268 | -0.50269091 |
| 1  | 4.89726639  | -2.52767277 | 0.87340909  | 8  | -4.10563374 | -2.60807276 | -0.65609092 |
| 6  | 5.21096659  | -0.75187272 | -0.25829092 | 8  | -3.64223337 | -0.65767276 | -2.00409079 |
| 6  | 4.61056662  | 0.34052730  | -0.87489092 | 6  | -5.00673342 | -2.57727265 | -1.76489091 |
| 1  | 5.24746656  | 1.04992723  | -1.39269102 | 6  | -4.32603359 | -1.66697276 | -2.78129101 |
| 6  | 3.22726655  | 0.54142725  | -0.84429091 | 1  | -5.97683334 | -2.17637277 | -1.44919097 |
| 6  | 2.18276644  | -2.61157274 | 1.20120907  | 1  | -5.13433361 | -3.59757280 | -2.12979102 |
| 6  | 2.61286640  | 1.76782727  | -1.54419100 | 1  | -3.57973337 | -2.20097280 | -3.37529087 |
| 6  | 1.42326653  | -1.99027276 | 2.39150906  | 1  | -5.02633333 | -1.15057278 | -3.43869090 |
| 1  | 0.80046654  | -1.14767277 | 2.08680916  | 8  | -4.36733341 | -0.35057271 | 0.45490912  |
| 1  | 0.78086650  | -2.73887277 | 2.87140894  | 6  | -4.56673336 | -0.85707271 | 1.79040909  |
| 1  | 2.12836647  | -1.61697268 | 3.14250898  | 1  | -4.95673370 | -1.87747276 | 1.75860906  |
| 6  | 1.20456648  | -3.28147268 | 0.21490909  | 1  | -3.63093352 | -0.83457273 | 2.35420895  |
| 1  | 0.53636646  | -2.56137276 | -0.25709090 | 1  | -5.29633331 | -0.19387272 | 2.25450897  |
| 1  | 1.76076651  | -3.79097271 | -0.57969087 | 8  | -1.11883354 | 1.37502730  | 1.72440898  |
| 1  | 0.58966649  | -4.02927256 | 0.73090911  | 8  | -2.24113345 | 0.97502732  | -0.63049090 |
| 6  | 3.04896641  | -3.74037266 | 1.78830910  | 6  | -1.98013353 | 2.19532728  | 1.38000906  |
| 1  | 3.60356641  | -4.28147268 | 1.01440907  | 6  | -2.67923355 | 2.10712719  | 0.02410909  |
| 1  | 3.76456642  | -3.37327266 | 2.53190899  | 1  | -3.75693345 | 2.04622722  | 0.25460911  |
| 1  | 2.40026641  | -4.46707249 | 2.29090905  | 1  | 6.28976631  | -0.88247275 | -0.29719090 |
| 6  | 3.67216635  | 2.63742733  | -2.24439096 | 8  | -2.35273361 | 3.19342732  | 2.16290903  |
| 1  | 4.40786648  | 3.04362726  | -1.54199100 | 6  | -1.67713344 | 3.30632734  | 3.43420911  |
| 1  | 4.20866632  | 2.08862734  | -3.02569103 | 1  | -2.10683346 | 4.18572760  | 3.91010904  |
| 1  | 3.17766643  | 3.48892736  | -2.72559094 | 1  | -0.60493350 | 3.43422723  | 3.27940893  |
| 6  | 1.61926651  | 1.32732725  | -2.63869095 | 1  | -1.85573351 | 2.41442728  | 4.03690910  |
| 1  | 0.81276655  | 0.71302724  | -2.23689103 | 6  | -2.43833351 | 3.38762736  | -0.78919089 |
| 1  | 1.17416656  | 2.20152736  | -3.13019085 | 1  | -2.81463337 | 4.27692747  | -0.27489090 |
| 1  | 2.13546658  | 0.73742729  | -3.40389085 | 1  | -2.95753360 | 3.28062725  | -1.74419093 |
| 6  | 1.91896653  | 2.67812729  | -0.51029092 | 1  | -1.37223351 | 3.51552725  | -0.99599087 |

## I-2\_LP

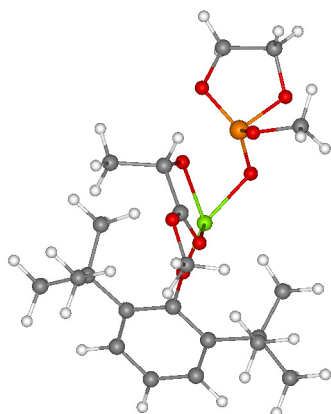

|                                              |                             |
|----------------------------------------------|-----------------------------|
| Zero-point vibrational energy                | 1448529.0 (Joules/Mol)      |
|                                              | 346.20674 (Kcal/Mol)        |
| Zero-point correction=                       | 0.551716 (Hartree/Particle) |
| Thermal correction to Energy=                | 0.586692                    |
| Thermal correction to Enthalpy=              | 0.587636                    |
| Thermal correction to Gibbs Free Energy=     | 0.484447                    |
| Sum of electronic and zero-point Energies=   | -1963.689561                |
| Sum of electronic and thermal Energies=      | -1963.654584                |
| Sum of electronic and thermal Enthalpies=    | -1963.653640                |
| Sum of electronic and thermal Free Energies= | -1963.756829                |

| cartesian |             |             |             |    |             |             |             |
|-----------|-------------|-------------|-------------|----|-------------|-------------|-------------|
| 12        | -0.62488794 | 0.24474543  | -0.06886065 | 1  | 0.69031197  | -1.27885461 | 1.93073928  |
| 8         | 1.19961214  | 0.12354544  | 0.07353935  | 1  | 0.88371199  | -2.97345448 | 2.41683936  |
| 6         | 2.50961208  | 0.20324543  | 0.28933936  | 1  | 1.89111209  | -1.70995462 | 3.14623952  |
| 6         | 3.21601200  | 1.41044545  | -0.00616065 | 6  | 1.84991217  | -2.82255435 | -0.16306065 |
| 6         | 4.59261227  | 1.44964540  | 0.23583935  | 1  | 2.62521219  | -3.05915451 | -0.90026069 |
| 1         | 5.15251207  | 2.35414553  | 0.02293935  | 1  | 1.30371213  | -3.74835443 | 0.05893935  |
| 6         | 5.28341198  | 0.35714546  | 0.74873936  | 1  | 1.16461205  | -2.10845447 | -0.62326068 |
| 6         | 4.58821201  | -0.81495458 | 1.02643931  | 8  | -1.89988804 | 1.36014545  | 0.93613935  |
| 1         | 5.14371204  | -1.65795457 | 1.42373931  | 15 | -3.25818801 | 0.64844543  | 0.92863935  |
| 6         | 3.21211219  | -0.92845458 | 0.80813932  | 8  | -4.12828827 | 1.85424542  | 1.71903932  |
| 6         | 2.49761200  | 2.65034556  | -0.57186067 | 8  | -3.77008796 | -0.49355456 | 1.98953938  |
| 6         | 2.48751211  | -2.25095439 | 1.12013936  | 6  | -5.13668776 | 1.32604539  | 2.55813956  |
| 6         | 1.83781219  | 2.32144547  | -1.92736065 | 6  | -4.54458809 | 0.02544544  | 3.07833934  |
| 1         | 1.15801191  | 1.47054541  | -1.86156070 | 1  | -6.06248808 | 1.14004540  | 1.99333930  |
| 1         | 1.27931213  | 3.18814564  | -2.30306053 | 1  | -5.34488773 | 2.04434538  | 3.35453939  |
| 1         | 2.60211205  | 2.06704545  | -2.67006063 | 1  | -3.87888789 | 0.19494544  | 3.93023944  |
| 6         | 1.45411205  | 3.17514563  | 0.43553936  | 1  | -5.29408789 | -0.72455460 | 3.33813953  |
| 1         | 0.72011203  | 2.41944551  | 0.71753931  | 8  | -4.10058784 | 0.68474543  | -0.47026068 |

|   |             |             |             |   |             |             |             |
|---|-------------|-------------|-------------|---|-------------|-------------|-------------|
| 1 | 1.94661212  | 3.50124550  | 1.35783935  | 6 | -4.83178806 | 1.85274541  | -0.87556064 |
| 1 | 0.91451198  | 4.03504562  | 0.02033935  | 1 | -5.72738791 | 1.99054539  | -0.26666063 |
| 6 | 3.46391201  | 3.81864548  | -0.83786064 | 1 | -4.21048784 | 2.74834561  | -0.81376064 |
| 1 | 3.95611191  | 4.16664553  | 0.07623935  | 1 | -5.11908770 | 1.67194545  | -1.91316068 |
| 1 | 4.23691225  | 3.55864549  | -1.56876063 | 8 | -1.15708804 | -0.24995457 | -2.06636047 |
| 1 | 2.90061212  | 4.66584539  | -1.24556065 | 8 | -2.33598804 | -0.85575455 | 0.17253935  |
| 6 | 3.44411206  | -3.33405447 | 1.64993930  | 6 | -2.07678795 | -1.07045460 | -2.14966059 |
| 1 | 4.22831202  | -3.58285451 | 0.92713934  | 6 | -2.77258801 | -1.62755454 | -0.91396070 |
| 1 | 3.92241192  | -3.04085445 | 2.59033942  | 1 | -3.85058784 | -1.52415454 | -1.06846070 |
| 1 | 2.87731218  | -4.25145483 | 1.84553933  | 1 | 6.35401201  | 0.41814545  | 0.92903936  |
| 6 | 1.42041206  | -2.03855443 | 2.21353936  | 8 | -2.50938797 | -1.54415452 | -3.30116057 |
| 6 | -2.42688799 | -3.10415435 | -0.70846069 | 6 | -1.83898807 | -1.06645453 | -4.49016094 |
| 1 | -2.76218796 | -3.70705438 | -1.55686069 | 1 | -2.32838798 | -1.57575452 | -5.31766081 |
| 1 | -2.93088794 | -3.44915438 | 0.19653934  | 1 | -0.77898800 | -1.31985462 | -4.44906092 |
| 1 | -1.35088801 | -3.24245453 | -0.57576066 | 1 | -1.95628786 | 0.01464544  | -4.57516098 |

### TS-24\_LP

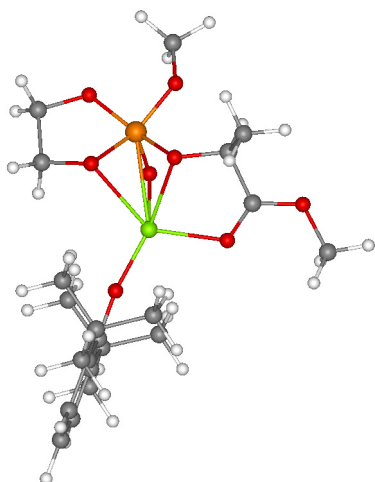

|                                              |                             |
|----------------------------------------------|-----------------------------|
| Zero-point vibrational energy                | 1449157.9 (Joules/Mol)      |
|                                              | 346.35705 (Kcal/Mol)        |
| Zero-point correction=                       | 0.551955 (Hartree/Particle) |
| Thermal correction to Energy=                | 0.587005                    |
| Thermal correction to Enthalpy=              | 0.587949                    |
| Thermal correction to Gibbs Free Energy=     | 0.484436                    |
| Sum of electronic and zero-point Energies=   | -1963.676642                |
| Sum of electronic and thermal Energies=      | -1963.641592                |
| Sum of electronic and thermal Enthalpies=    | -1963.640648                |
| Sum of electronic and thermal Free Energies= | -1963.744162                |



cartesian

|    |             |             |             |    |             |             |             |
|----|-------------|-------------|-------------|----|-------------|-------------|-------------|
| 12 | 0.83857894  | -0.06782274 | -0.23654543 | 1  | -2.04072094 | 3.29787731  | 0.61435461  |
| 8  | -0.97402108 | -0.17032273 | 0.04475456  | 1  | -0.80892098 | 3.25557733  | 1.89015460  |
| 6  | -2.30332088 | -0.15072274 | 0.05855456  | 1  | -0.70342100 | 2.15537739  | 0.49795458  |
| 6  | -3.04412079 | -0.97302276 | -0.84744543 | 8  | 2.28797913  | -1.37452281 | -0.83894539 |
| 6  | -4.44062090 | -0.93432271 | -0.79024541 | 15 | 3.13317919  | -1.09572279 | 0.41665456  |
| 1  | -5.02562094 | -1.55042279 | -1.46494544 | 8  | 3.65417910  | -2.54152274 | 1.06595457  |
| 6  | -5.12032080 | -0.12392274 | 0.11255457  | 8  | 1.90497899  | -1.01972282 | 1.63525462  |
| 6  | -4.39132071 | 0.67667729  | 0.98535460  | 6  | 2.82157898  | -3.14262271 | 2.04405451  |
| 1  | -4.93772078 | 1.30397725  | 1.68155456  | 6  | 1.53177893  | -2.32552266 | 2.06755447  |
| 6  | -2.99322081 | 0.69037730  | 0.98675460  | 1  | 3.34387875  | -3.10742259 | 3.00615454  |
| 6  | -2.34172106 | -1.88612282 | -1.87054539 | 1  | 2.63817883  | -4.18452311 | 1.77035463  |
| 6  | -2.23342085 | 1.60087717  | 1.97025454  | 1  | 0.78407896  | -2.74302268 | 1.38525462  |
| 6  | -1.50302100 | -1.04532278 | -2.85514545 | 1  | 1.10227895  | -2.24072266 | 3.06695437  |
| 1  | -0.78912103 | -0.39912274 | -2.34174562 | 8  | 4.67447901  | -0.66512275 | 0.08895457  |
| 1  | -0.94702101 | -1.69412279 | -3.54254556 | 6  | 5.69647932  | -1.61572278 | -0.24534543 |
| 1  | -2.15372086 | -0.39642274 | -3.45144558 | 1  | 6.04097891  | -2.13902259 | 0.64745456  |
| 6  | -1.45992100 | -2.92612267 | -1.15034544 | 1  | 5.33757925  | -2.33942270 | -0.98064542 |
| 1  | -0.70782101 | -2.45162272 | -0.51904541 | 1  | 6.51207924  | -1.02982271 | -0.67464542 |
| 1  | -2.07592106 | -3.56782269 | -0.51084542 | 8  | 1.24857903  | 1.56777716  | -1.45814538 |
| 1  | -0.94302106 | -3.56472278 | -1.87674546 | 8  | 2.77507877  | 0.67527729  | 0.51145458  |
| 6  | -3.33962107 | -2.68432260 | -2.72844553 | 6  | 2.36247897  | 2.08487725  | -1.34884536 |
| 1  | -3.96522093 | -3.34922266 | -2.12374544 | 6  | 3.38447905  | 1.64847720  | -0.31154543 |
| 1  | -3.99572086 | -2.03372264 | -3.31594563 | 1  | 4.22427893  | 1.22077715  | -0.86804539 |
| 1  | -2.78492117 | -3.31212258 | -3.43514562 | 1  | -6.20742083 | -0.11562274 | 0.13525458  |
| 6  | -3.18152094 | 2.40477729  | 2.87755442  | 8  | 2.77277899  | 3.05917740  | -2.13664556 |
| 1  | -3.83892107 | 3.06997728  | 2.30745435  | 6  | 1.84687901  | 3.49517727  | -3.15974545 |
| 1  | -3.80502081 | 1.75677717  | 3.50235438  | 1  | 2.36527896  | 4.29017687  | -3.69134545 |
| 1  | -2.58792114 | 3.03357744  | 3.55095458  | 1  | 0.93087900  | 3.86677742  | -2.69944549 |
| 6  | -1.33912098 | 0.76317728  | 2.90725446  | 1  | 1.61447895  | 2.66607738  | -3.82904553 |
| 1  | -0.61232102 | 0.16707727  | 2.35485458  | 6  | 3.88157892  | 2.81337738  | 0.54115456  |
| 1  | -0.79402101 | 1.41537726  | 3.60115457  | 1  | 4.33857918  | 3.58867741  | -0.07804543 |
| 1  | -1.95262110 | 0.07767726  | 3.50245452  | 1  | 4.62647915  | 2.43177724  | 1.24185455  |
| 6  | -1.39062107 | 2.63527727  | 1.19635463  | 1  | 3.05897903  | 3.24857736  | 1.11435461  |

# I-4\_LP

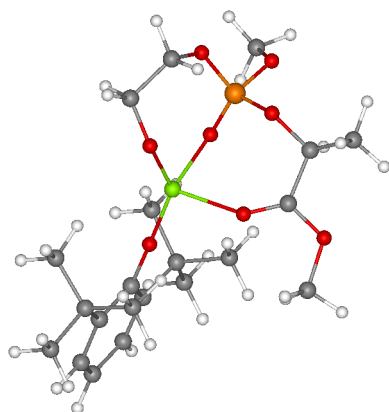

|                                              |                             |
|----------------------------------------------|-----------------------------|
| Zero-point vibrational energy                | 1446312.2 (Joules/Mol)      |
|                                              | 345.67691 (Kcal/Mol)        |
| Zero-point correction=                       | 0.550871 (Hartree/Particle) |
| Thermal correction to Energy=                | 0.587327                    |
| Thermal correction to Enthalpy=              | 0.588272                    |
| Thermal correction to Gibbs Free Energy=     | 0.480780                    |
| Sum of electronic and zero-point Energies=   | -1963.692808                |
| Sum of electronic and thermal Energies=      | -1963.656352                |
| Sum of electronic and thermal Enthalpies=    | -1963.655408                |
| Sum of electronic and thermal Free Energies= | -1963.762900                |

|    |             |             |             | cartesian |             |             |             |
|----|-------------|-------------|-------------|-----------|-------------|-------------|-------------|
| 12 | 0.71300149  | 0.75139695  | 0.51992869  | 1         | -2.51169872 | 2.50359702  | -2.00287127 |
| 8  | -1.02909851 | 0.12829691  | 0.40542874  | 1         | -1.63069868 | 3.69579697  | -1.02777123 |
| 6  | -2.31559873 | -0.17360309 | 0.28792873  | 1         | -1.09799862 | 2.00509691  | -1.07597125 |
| 6  | -2.72869849 | -1.54450309 | 0.30412874  | 8         | 2.14990139  | -0.65170306 | 0.97862870  |
| 6  | -4.08999872 | -1.83450317 | 0.17292874  | 15        | 3.57850146  | -0.19860309 | 0.89762872  |
| 1  | -4.42659855 | -2.86590290 | 0.18382874  | 8         | 4.13530159  | 0.79189694  | 1.97312880  |
| 6  | -5.04669857 | -0.83530307 | 0.02982873  | 8         | 4.56360149  | -1.44590306 | 0.98402870  |
| 6  | -4.63859844 | 0.49419692  | 0.01902873  | 6         | 4.29660130  | -2.51380301 | 1.91982877  |
| 1  | -5.39909840 | 1.26039684  | -0.08867127 | 1         | 4.56390142  | -2.19370294 | 2.92922878  |
| 6  | -3.29509854 | 0.86099696  | 0.14432873  | 1         | 3.24510145  | -2.80330300 | 1.87712872  |
| 6  | -1.71259856 | -2.68950295 | 0.47142875  | 1         | 4.93130159  | -3.34480309 | 1.61482882  |
| 6  | -2.90299869 | 2.35039711  | 0.13422874  | 8         | 1.39070153  | 0.67899692  | -1.49437118 |
| 6  | -0.69879860 | -2.68310308 | -0.69107127 | 8         | 3.97350144  | 0.46999690  | -0.50337130 |
| 1  | -0.17159855 | -1.73020315 | -0.75097132 | 6         | 2.26180148  | 0.20739692  | -2.20787120 |
| 1  | 0.04160145  | -3.48290300 | -0.56107128 | 6         | 3.67590141  | -0.15970308 | -1.75317121 |
| 1  | -1.21429849 | -2.85210299 | -1.64387119 | 1         | 3.68570137  | -1.25120306 | -1.63597119 |
| 6  | -0.98469859 | -2.56480289 | 1.82532883  | 1         | -6.09939861 | -1.08970308 | -0.06757127 |
| 1  | -0.46159858 | -1.61290312 | 1.91682875  | 8         | 2.06790137  | -0.08440308 | -3.48277116 |

|   |             |             |             |   |            |             |             |
|---|-------------|-------------|-------------|---|------------|-------------|-------------|
| 1 | -1.70309854 | -2.63630295 | 2.64932871  | 6 | 0.72980142 | 0.14359692  | -3.99397135 |
| 1 | -0.25279856 | -3.37410307 | 1.94382882  | 1 | 0.76250148 | -0.19240308 | -5.02797127 |
| 6 | -2.38119864 | -4.07560301 | 0.45732874  | 1 | 0.48930144 | 1.20539689  | -3.93597126 |
| 1 | -3.09329867 | -4.20130301 | 1.27972877  | 1 | 0.00720146 | -0.43220308 | -3.41567135 |
| 1 | -2.90449858 | -4.27470303 | -0.48427126 | 6 | 4.75500154 | 0.25439692  | -2.74297118 |
| 1 | -1.61209869 | -4.84810305 | 0.57242870  | 1 | 4.58790159 | -0.21800309 | -3.71157122 |
| 6 | -4.12189865 | 3.27759695  | -0.02617126 | 1 | 5.72670126 | -0.05710308 | -2.35547113 |
| 1 | -4.65949869 | 3.10169697  | -0.96417135 | 1 | 4.76090145 | 1.33929694  | -2.87097120 |
| 1 | -4.83189869 | 3.17699695  | 0.80162871  | 6 | 3.87580132 | 2.23819709  | 2.07672882  |
| 1 | -3.78119850 | 4.31919670  | -0.03677126 | 1 | 4.50670147 | 2.54639697  | 2.91342878  |
| 6 | -2.23599863 | 2.74429703  | 1.46762872  | 6 | 2.40840149 | 2.55409694  | 2.30502868  |
| 1 | -1.33679843 | 2.16339707  | 1.67452872  | 1 | 4.23210144 | 2.69359708  | 1.14962876  |
| 1 | -1.95499849 | 3.80419707  | 1.45802879  | 1 | 2.37730145 | 3.64189696  | 2.51302886  |
| 1 | -2.93229866 | 2.58549690  | 2.29832888  | 1 | 2.09560156 | 2.05719709  | 3.24362874  |
| 6 | -1.97429872 | 2.65479708  | -1.05947125 | 8 | 1.64220142 | 2.21579695  | 1.21892881  |

# I-5\_LPL

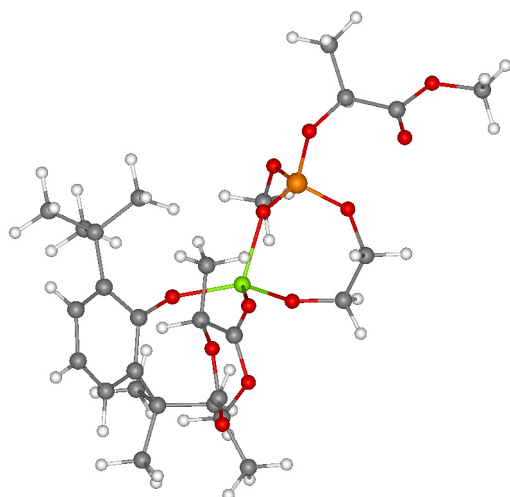

|                                              |                             |
|----------------------------------------------|-----------------------------|
| Zero-point vibrational energy                | 1819608.6 (Joules/Mol)      |
|                                              | 434.89689 (Kcal/Mol)        |
| Zero-point correction=                       | 0.693052 (Hartree/Particle) |
| Thermal correction to Energy=                | 0.740863                    |
| Thermal correction to Enthalpy=              | 0.741807                    |
| Thermal correction to Gibbs Free Energy=     | 0.606007                    |
| Sum of electronic and zero-point Energies=   | -2497.786012                |
| Sum of electronic and thermal Energies=      | -2497.738201                |
| Sum of electronic and thermal Enthalpies=    | -2497.737257                |
| Sum of electronic and thermal Free Energies= | -2497.873057                |

|           |             |             |             |    |             |            |             |
|-----------|-------------|-------------|-------------|----|-------------|------------|-------------|
| cartesian |             |             |             |    |             |            |             |
| 12        | -0.38059509 | -0.04624899 | -0.77887499 | 15 | -3.47739506 | 0.31735098 | -0.19807494 |

---

|   |             |             |             |   |             |             |             |
|---|-------------|-------------|-------------|---|-------------|-------------|-------------|
| 8 | -4.46909523 | 0.20575102  | 1.03842509  | 8 | -3.94239497 | -0.71954900 | -1.29817498 |
| 8 | 0.92520493  | 1.34535110  | -0.63227499 | 8 | -1.27389514 | -0.49164897 | -2.38177490 |
| 6 | -5.89009523 | 0.13515101  | 0.86922503  | 6 | -3.14139509 | -1.87634897 | -1.70187497 |
| 6 | -6.31179523 | -1.32874894 | 0.73762500  | 6 | -2.15109515 | -1.47244895 | -2.78747487 |
| 1 | -6.19279480 | 0.66385102  | -0.04057495 | 1 | -3.87109494 | -2.60894895 | -2.05487490 |
| 6 | 2.13340497  | 1.35105109  | -0.08937495 | 1 | -2.63619494 | -2.27604914 | -0.81777495 |
| 6 | 3.25820494  | 0.83225101  | -0.81777495 | 1 | -1.64289510 | -2.40914917 | -3.09167480 |
| 6 | 4.45530510  | 0.62455100  | -0.11987495 | 1 | -2.73509502 | -1.14544892 | -3.66757488 |
| 1 | 5.31770515  | 0.21065103  | -0.63437498 | 8 | -3.86919498 | 1.72975111  | -0.80567497 |
| 6 | 4.60240507  | 0.98455101  | 1.21952498  | 1 | 5.54120493  | 0.80755097  | 1.73902500  |
| 6 | 3.56880498  | 1.68275106  | 1.84372509  | 6 | -3.34389496 | 2.16655087  | -2.08847475 |
| 1 | 3.74100494  | 2.06315088  | 2.84582520  | 1 | -2.91479492 | 3.15625095  | -1.93057501 |
| 6 | 2.34640503  | 1.92605102  | 1.20842505  | 1 | -4.18169498 | 2.22285104  | -2.78497481 |
| 6 | 3.21000504  | 0.65965098  | -2.35247493 | 1 | -2.58389497 | 1.47665107  | -2.46657491 |
| 6 | 1.31230485  | 2.87605095  | 1.84752500  | 8 | 4.58250475  | -4.49004889 | 1.80872500  |
| 6 | 2.81040502  | 2.01305103  | -2.97867489 | 8 | 3.00560498  | -3.03674912 | 2.40532517  |
| 1 | 1.82890475  | 2.33445096  | -2.62477493 | 6 | 3.82330513  | -3.60694909 | 1.49732506  |
| 1 | 2.77100492  | 1.92675102  | -4.07147503 | 6 | 3.70070505  | -3.05624914 | 0.08422505  |
| 1 | 3.54180503  | 2.78825092  | -2.72587490 | 8 | 2.30980492  | -2.74064898 | -0.21677494 |
| 6 | 2.22650504  | -0.42344898 | -2.83607483 | 6 | 1.64060485  | -2.01134896 | 0.66232502  |
| 1 | 1.18190479  | -0.12424899 | -2.73897481 | 6 | 2.25790501  | -1.85714889 | 2.03652501  |
| 1 | 2.37140489  | -1.37154889 | -2.30947495 | 1 | 2.94780493  | -1.00024903 | 1.97522497  |
| 1 | 2.38480496  | -0.61674899 | -3.90427494 | 8 | 0.56250489  | -1.51774895 | 0.35522506  |
| 6 | 4.59200478  | 0.29155099  | -2.92167497 | 1 | 4.25340509  | -2.10884905 | 0.03522505  |
| 1 | 4.93580484  | -0.69534898 | -2.58867478 | 6 | 1.22760487  | -1.62824893 | 3.12262511  |
| 1 | 5.35870504  | 1.02785110  | -2.65997481 | 1 | 1.73910487  | -1.48114896 | 4.07552481  |
| 1 | 4.53260517  | 0.25705099  | -4.01467514 | 1 | 0.55940491  | -2.48834896 | 3.20612526  |
| 6 | 1.88500488  | 3.59015083  | 3.08502507  | 1 | 0.63770491  | -0.74264902 | 2.89282513  |
| 1 | 2.80270505  | 4.14205122  | 2.85602522  | 6 | 4.18860483  | -4.02114916 | -0.97147501 |
| 1 | 2.09480500  | 2.89875102  | 3.90892506  | 1 | 3.62520504  | -4.95574903 | -0.93237495 |
| 1 | 1.14940488  | 4.31285095  | 3.45502520  | 1 | 5.24100494  | -4.24664879 | -0.79387498 |
| 6 | 0.03560488  | 2.14925098  | 2.30322504  | 1 | 4.07890511  | -3.57434916 | -1.96137488 |
| 1 | -0.47299510 | 1.64625108  | 1.48182499  | 8 | -7.60819483 | -1.39174891 | 0.38142505  |
| 1 | -0.67189509 | 2.86685085  | 2.73702526  | 8 | -5.60619497 | -2.28874898 | 0.94082505  |
| 1 | 0.26340491  | 1.41145110  | 3.08002520  | 6 | -8.15029526 | -2.71894908 | 0.26262504  |
| 6 | 0.94250494  | 3.97425103  | 0.82772505  | 1 | -7.61779499 | 0.75935102  | 2.00202513  |
| 1 | 1.83000481  | 4.54935122  | 0.54152507  | 1 | -6.20909500 | 1.83655107  | 2.14082503  |
| 1 | 0.21910490  | 4.66985130  | 1.27042508  | 1 | -6.22119522 | 0.28305101  | 2.99922514  |
| 1 | 0.50520492  | 3.54605103  | -0.07537495 | 1 | -9.19579506 | -2.58324909 | -0.00947495 |
| 6 | -6.52969503 | 0.79415101  | 2.08402514  | 1 | -8.06529522 | -3.25114918 | 1.21212506  |
| 8 | -2.07839513 | 0.17345102  | 0.31272504  | 1 | -7.62109518 | -3.27634907 | -0.51267499 |

---

## I-5\_LPP

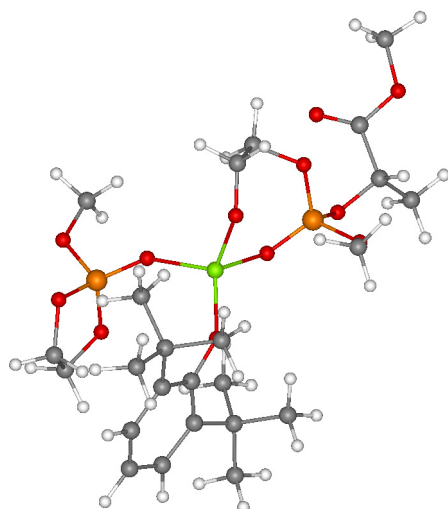

|                                              |                             |
|----------------------------------------------|-----------------------------|
| Zero-point vibrational energy                | 1752800.6 (Joules/Mol)      |
|                                              | 418.92940 (Kcal/Mol)        |
| Zero-point correction=                       | 0.667607 (Hartree/Particle) |
| Thermal correction to Energy=                | 0.714352                    |
| Thermal correction to Enthalpy=              | 0.715296                    |
| Thermal correction to Gibbs Free Energy=     | 0.582249                    |
| Sum of electronic and zero-point Energies=   | -2724.269713                |
| Sum of electronic and thermal Energies=      | -2724.222968                |
| Sum of electronic and thermal Enthalpies=    | -2724.222024                |
| Sum of electronic and thermal Free Energies= | -2724.355071                |

|    |             |             |             | cartesian |             |             |             |
|----|-------------|-------------|-------------|-----------|-------------|-------------|-------------|
| 12 | -0.10930753 | 0.29227048  | 0.66469258  | 8         | -1.78880751 | 0.02857049  | -0.46290740 |
| 8  | -4.15530729 | -0.36512953 | -1.16370738 | 15        | -3.09450769 | -0.52312952 | 0.01269260  |
| 8  | 1.32659256  | -0.86812955 | 0.25119260  | 8         | -3.71900749 | 0.14057049  | 1.30849266  |
| 6  | -5.53690767 | -0.69302952 | -0.97950739 | 8         | -1.02300751 | 0.14437050  | 2.32219243  |
| 6  | -6.29440784 | 0.53647053  | -0.47760740 | 6         | -3.12460756 | 1.29287052  | 1.98389268  |
| 1  | -5.64350748 | -1.49282956 | -0.23990740 | 6         | -2.03580761 | 0.83327049  | 2.94659257  |
| 6  | 2.59979248  | -1.00332952 | -0.07610740 | 1         | -3.96050763 | 1.77567053  | 2.49639249  |
| 6  | 3.62199235  | -0.95482951 | 0.93169260  | 1         | -2.72950768 | 1.97357059  | 1.22399271  |
| 6  | 4.96019220  | -0.94682950 | 0.52029258  | 1         | -1.68640745 | 1.75077057  | 3.46239257  |
| 1  | 5.75129223  | -0.88052946 | 1.26009262  | 1         | -2.51970768 | 0.21507049  | 3.72609258  |
| 6  | 5.32409239  | -1.02952957 | -0.82150739 | 8         | -3.15990758 | -2.08272958 | 0.29409260  |
| 6  | 4.32829237  | -1.21422958 | -1.77860737 | 1         | 6.37239218  | -1.01332951 | -1.11110735 |
| 1  | 4.63259220  | -1.36312962 | -2.81000757 | 6         | -2.52140760 | -2.67762947 | 1.45709264  |
| 6  | 2.97059250  | -1.24342942 | -1.44330740 | 1         | -1.88410747 | -1.95552945 | 1.97529268  |
| 6  | 3.28319240  | -0.96302956 | 2.43689251  | 1         | -1.92910755 | -3.51642966 | 1.09129262  |
| 6  | 1.91989243  | -1.60972953 | -2.51200747 | 1         | -3.31220770 | -3.03162956 | 2.12059259  |

---

|   |             |             |             |    |             |             |             |
|---|-------------|-------------|-------------|----|-------------|-------------|-------------|
| 6 | 2.37469244  | -2.16692948 | 2.76249242  | 8  | 0.44119245  | 2.19967055  | 0.17499259  |
| 1 | 1.44589245  | -2.13062954 | 2.19259262  | 15 | 1.52119255  | 3.08787036  | -0.34050742 |
| 1 | 2.12419248  | -2.17292953 | 3.83019257  | 8  | 2.90399241  | 3.16097045  | 0.44449261  |
| 1 | 2.88789248  | -3.10652947 | 2.52889252  | 8  | 2.07209229  | 2.65547037  | -1.77950740 |
| 6 | 2.60039234  | 0.34377050  | 2.88719249  | 6  | 3.96169233  | 2.55307055  | -0.35040739 |
| 1 | 1.58529246  | 0.44257051  | 2.50129247  | 6  | 3.51849246  | 2.71247053  | -1.80580735 |
| 1 | 3.18079233  | 1.22107053  | 2.58259249  | 8  | 1.05399251  | 4.60177040  | -0.38190740 |
| 1 | 2.51289248  | 0.36457050  | 3.98029256  | 6  | -0.33560753 | 4.94667053  | -0.57910740 |
| 6 | 4.54529238  | -1.11542940 | 3.30589247  | 1  | -0.97020757 | 4.35827065  | 0.08449259  |
| 1 | 5.21609259  | -0.25192952 | 3.23009253  | 1  | -0.61740756 | 4.77727032  | -1.62050736 |
| 1 | 5.11419249  | -2.01722956 | 3.05589247  | 1  | -0.41340753 | 6.00577021  | -0.33880740 |
| 1 | 4.24669218  | -1.19752955 | 4.35669279  | 1  | 3.86819220  | 1.89007044  | -2.42870736 |
| 6 | 2.57359242  | -2.02392960 | -3.84260750 | 1  | 3.81469250  | 3.67487049  | -2.23290753 |
| 1 | 3.25929236  | -2.86922956 | -3.72130752 | 1  | 4.88129234  | 3.09327054  | -0.12620740 |
| 1 | 3.12119246  | -1.20102954 | -4.31620741 | 1  | 4.05329227  | 1.50457048  | -0.06110740 |
| 1 | 1.79159248  | -2.33352947 | -4.54500723 | 8  | -7.50040770 | 0.15897049  | -0.01200740 |
| 6 | 0.97529250  | -0.43722951 | -2.83200741 | 8  | -5.89970779 | 1.67817044  | -0.51780742 |
| 1 | 0.39379245  | -0.13012952 | -1.96400738 | 6  | -8.34770679 | 1.22787046  | 0.44239259  |
| 1 | 0.26339245  | -0.72962952 | -3.61360741 | 1  | -8.54700756 | 1.92897058  | -0.37070739 |
| 1 | 1.53239250  | 0.43227050  | -3.19470739 | 1  | -7.13870764 | -1.41612959 | -2.23370743 |
| 6 | 1.09939253  | -2.82282948 | -2.02480745 | 1  | -5.52690744 | -2.04132962 | -2.65130734 |
| 1 | 1.75169253  | -3.68982959 | -1.87210739 | 1  | -5.96350765 | -0.37292951 | -3.07310748 |
| 1 | 0.34499246  | -3.09392953 | -2.77350736 | 1  | -9.26930714 | 0.74997050  | 0.77099258  |
| 1 | 0.59239244  | -2.60562968 | -1.08390737 | 1  | -7.87540770 | 1.76007056  | 1.27039266  |
| 6 | -6.08100748 | -1.15922952 | -2.32360744 |    |             |             |             |

---

## S1.9. PL sequence, mononuclear mechanism

### I-1\_PL

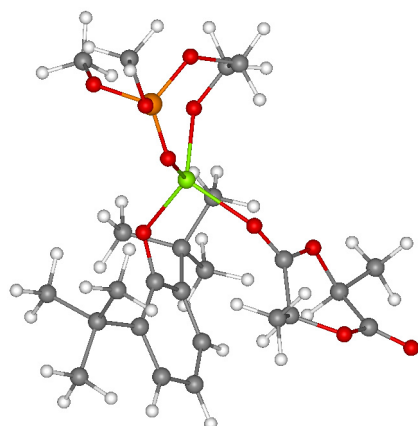

|                                              |                             |
|----------------------------------------------|-----------------------------|
| Zero-point vibrational energy                | 1632022.7 (Joules/Mol)      |
|                                              | 390.06278 (Kcal/Mol)        |
| Zero-point correction=                       | 0.621605 (Hartree/Particle) |
| Thermal correction to Energy=                | 0.663734                    |
| Thermal correction to Enthalpy=              | 0.664678                    |
| Thermal correction to Gibbs Free Energy=     | 0.542884                    |
| Sum of electronic and zero-point Energies=   | -2230.735845                |
| Sum of electronic and thermal Energies=      | -2230.693716                |
| Sum of electronic and thermal Enthalpies=    | -2230.692772                |
| Sum of electronic and thermal Free Energies= | -2230.814566                |

| cartesian |             |             |             |    |             |             |             |  |  |  |  |
|-----------|-------------|-------------|-------------|----|-------------|-------------|-------------|--|--|--|--|
| 12        | -1.26337743 | -0.54803741 | -0.29808521 | 1  | -1.43327737 | 4.52216244  | 0.60421479  |  |  |  |  |
| 8         | -5.12847710 | -0.56613743 | 1.95051479  | 1  | -1.10137737 | 3.19166255  | -0.52328521 |  |  |  |  |
| 8         | -0.28057736 | 1.04016256  | -0.71098518 | 1  | -7.04097700 | -0.04573746 | 1.30131471  |  |  |  |  |
| 6         | -6.55107737 | -0.78373748 | 1.94021475  | 8  | -2.84437752 | -0.40503746 | 0.96341479  |  |  |  |  |
| 1         | -6.87957716 | -0.65943742 | 2.97131491  | 15 | -4.27257729 | -0.70243746 | 0.62271482  |  |  |  |  |
| 1         | -6.77987719 | -1.79603744 | 1.59791470  | 8  | -4.55957699 | -2.14813757 | 0.03341480  |  |  |  |  |
| 6         | 0.95962268  | 1.38916254  | -0.40208519 | 8  | -2.20627737 | -1.58643746 | -1.56998527 |  |  |  |  |
| 6         | 2.06232262  | 0.92876250  | -1.20018530 | 6  | -3.51177740 | -3.13013744 | -0.24018522 |  |  |  |  |
| 6         | 3.35832262  | 1.11106253  | -0.70028520 | 6  | -2.81097746 | -2.82373738 | -1.55808520 |  |  |  |  |
| 1         | 4.21302271  | 0.75226253  | -1.26638520 | 1  | -4.03457737 | -4.08973742 | -0.26458520 |  |  |  |  |
| 6         | 3.60192251  | 1.79286265  | 0.49191481  | 1  | -2.80737734 | -3.12593746 | 0.59801477  |  |  |  |  |
| 6         | 2.53442264  | 2.41506267  | 1.13911474  | 1  | -2.09727740 | -3.65583730 | -1.71898520 |  |  |  |  |
| 1         | 2.75212264  | 3.04196262  | 1.99811471  | 1  | -3.56237745 | -2.90903735 | -2.36468506 |  |  |  |  |
| 6         | 1.21412253  | 2.27596259  | 0.69771481  | 8  | -5.00347710 | 0.30826253  | -0.35568517 |  |  |  |  |
| 6         | 1.84662247  | 0.40136254  | -2.63648510 | 1  | 4.61802292  | 1.91736269  | 0.85891479  |  |  |  |  |

|   |             |             |             |   |             |             |             |
|---|-------------|-------------|-------------|---|-------------|-------------|-------------|
| 6 | 0.09262264  | 3.13926268  | 1.31331480  | 6 | -4.86827707 | 0.25286257  | -1.80018520 |
| 6 | 1.09442258  | 1.48466253  | -3.43948507 | 1 | -4.94227743 | 1.28356266  | -2.14618516 |
| 1 | 0.12612262  | 1.70496249  | -2.98578525 | 1 | -5.69447708 | -0.33933747 | -2.19878507 |
| 1 | 0.92392260  | 1.14236259  | -4.46748495 | 1 | -3.91007733 | -0.18673745 | -2.08918524 |
| 1 | 1.67642260  | 2.41166258  | -3.48298502 | 8 | 4.80602264  | -3.39023733 | 2.10171485  |
| 6 | 1.04932261  | -0.91463745 | -2.71448517 | 8 | 3.10912251  | -2.09193754 | 2.72631478  |
| 1 | -0.00777738 | -0.78483742 | -2.47928524 | 6 | 3.85492253  | -2.71733737 | 1.79271472  |
| 1 | 1.46322274  | -1.68383741 | -2.05538511 | 6 | 3.39722252  | -2.50783730 | 0.35661477  |
| 1 | 1.08542252  | -1.30933738 | -3.73758507 | 8 | 1.94102263  | -2.47923732 | 0.28991479  |
| 6 | 3.18502259  | 0.15276253  | -3.35478520 | 6 | 1.30042267  | -1.69393754 | 1.14101481  |
| 1 | 3.76592255  | -0.65493745 | -2.89298511 | 6 | 2.10262251  | -1.14613748 | 2.30271482  |
| 1 | 3.81252265  | 1.04906249  | -3.39128518 | 1 | 2.59902263  | -0.23313746 | 1.93621469  |
| 1 | 2.98632264  | -0.14743745 | -4.38908529 | 8 | 0.10802263  | -1.45973754 | 0.98321480  |
| 6 | 0.65692264  | 4.21156263  | 2.26291490  | 1 | 3.74542260  | -1.52093744 | 0.02451479  |
| 1 | 1.39102268  | 4.85566282  | 1.76751471  | 6 | 1.25062251  | -0.83183748 | 3.51391482  |
| 1 | 1.12352252  | 3.78056240  | 3.15591478  | 1 | 1.88172245  | -0.40303746 | 4.29441500  |
| 1 | -0.16247737 | 4.85116243  | 2.60901475  | 1 | 0.77692264  | -1.73843741 | 3.89721489  |
| 6 | -0.92047739 | 2.31376266  | 2.12391472  | 1 | 0.47732264  | -0.11443746 | 3.24461484  |
| 1 | -1.41877747 | 1.55676246  | 1.52021480  | 6 | 3.87652278  | -3.59213734 | -0.58058518 |
| 1 | -1.69907737 | 2.96966267  | 2.53261495  | 1 | 3.51042247  | -4.57013750 | -0.26148522 |
| 1 | -0.43487737 | 1.82186270  | 2.97351480  | 1 | 4.96712303  | -3.61523747 | -0.57528520 |
| 6 | -0.64477736 | 3.88756275  | 0.18211479  | 1 | 3.52662253  | -3.38823748 | -1.59408522 |
| 1 | 0.04822263  | 4.53286266  | -0.36858517 |   |             |             |             |

### TS-12\_PL

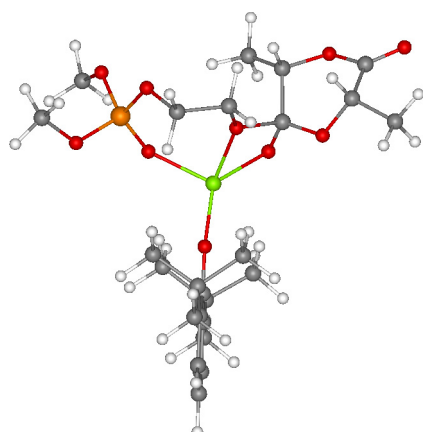

|                                          |                             |
|------------------------------------------|-----------------------------|
| Zero-point vibrational energy            | 1632019.7 (Joules/Mol)      |
|                                          | 390.06208 (Kcal/Mol)        |
| Zero-point correction=                   | 0.621603 (Hartree/Particle) |
| Thermal correction to Energy=            | 0.662683                    |
| Thermal correction to Enthalpy=          | 0.663628                    |
| Thermal correction to Gibbs Free Energy= | 0.544119                    |



|                                              |              |
|----------------------------------------------|--------------|
| Sum of electronic and zero-point Energies=   | -2230.720704 |
| Sum of electronic and thermal Energies=      | -2230.679624 |
| Sum of electronic and thermal Enthalpies=    | -2230.678680 |
| Sum of electronic and thermal Free Energies= | -2230.798188 |

|    |             |             |             | cartesian |             |             |             |
|----|-------------|-------------|-------------|-----------|-------------|-------------|-------------|
| 12 | -0.40561718 | -0.00560797 | -0.63097334 | 1         | 1.02428281  | -2.10510802 | -3.70697355 |
| 8  | -0.09081718 | 4.11239243  | 0.26242664  | 1         | 0.76898289  | -1.97390795 | -1.95967329 |
| 8  | 1.35308290  | -0.36250797 | -0.20157336 | 1         | -0.99801719 | 5.99639225  | 0.34502664  |
| 6  | -0.39531720 | 5.33229208  | 0.96902668  | 8         | -1.80571711 | -1.21480799 | -1.32327330 |
| 1  | 0.56468284  | 5.79599237  | 1.18922663  | 6         | -2.70621705 | -1.20050800 | -0.40907335 |
| 1  | -0.92481720 | 5.11379242  | 1.89902663  | 8         | -2.72811723 | -2.32170796 | 0.39182663  |
| 6  | 2.61538291  | -0.76590800 | -0.10667336 | 6         | -3.98171711 | -2.67600799 | 0.99012661  |
| 6  | 3.25468278  | -0.78610796 | 1.17252672  | 6         | -5.04161739 | -2.79500794 | -0.10327336 |
| 6  | 4.57938242  | -1.22510803 | 1.25092661  | 1         | -4.30371714 | -1.88550794 | 1.68602669  |
| 1  | 5.08388281  | -1.25590801 | 2.21102643  | 8         | -5.87331724 | -3.66770792 | -0.16307336 |
| 6  | 5.28838253  | -1.62930799 | 0.12492663  | 6         | -4.12221718 | -0.69810796 | -0.75767332 |
| 6  | 4.66458273  | -1.59130800 | -1.11737335 | 8         | -4.97681761 | -1.82810795 | -1.04587340 |
| 1  | 5.23578262  | -1.90410793 | -1.98507333 | 8         | -0.60831720 | 1.99429202  | -0.94967335 |
| 6  | 3.34088278  | -1.16810799 | -1.27187335 | 15        | -1.24611723 | 3.15199208  | -0.25747335 |
| 6  | 2.52048278  | -0.31830797 | 2.44222665  | 8         | -2.22121716 | 2.85379195  | 0.95652664  |
| 6  | 2.69628286  | -1.15110803 | -2.67007351 | 8         | -2.06901717 | 0.04799203  | 0.56462663  |
| 6  | 1.27508283  | -1.18880796 | 2.70782661  | 6         | -1.87241721 | 1.91709197  | 2.01582646  |
| 1  | 0.57928276  | -1.17390800 | 1.86802661  | 6         | -2.54201722 | 0.57689202  | 1.77292669  |
| 1  | 0.75038278  | -0.84030795 | 3.60772657  | 1         | -2.23671722 | 2.37129211  | 2.94032645  |
| 1  | 1.56608284  | -2.23130798 | 2.87532663  | 1         | -0.78631723 | 1.80639207  | 2.08272648  |
| 6  | 2.12498283  | 1.16529202  | 2.29692650  | 1         | -2.31221724 | -0.07600798 | 2.62862659  |
| 1  | 1.51998281  | 1.32929206  | 1.40292668  | 1         | -3.62971711 | 0.73159200  | 1.74152672  |
| 1  | 3.01858282  | 1.79269207  | 2.20702648  | 8         | -2.22781730 | 4.00499201  | -1.16527331 |
| 1  | 1.56808281  | 1.50349200  | 3.18202662  | 1         | 6.31798267  | -1.96730804 | 0.21412665  |
| 6  | 3.39878273  | -0.41840798 | 3.70152664  | 1         | -4.55221748 | -0.17590797 | 0.10402664  |
| 1  | 4.29838276  | 0.20219202  | 3.63122654  | 6         | -1.84871721 | 4.29589224  | -2.53187346 |
| 1  | 3.70678306  | -1.44830799 | 3.90992665  | 1         | -0.98501718 | 4.96449232  | -2.55247355 |
| 1  | 2.82828283  | -0.06720798 | 4.56932640  | 1         | -2.71151710 | 4.78739214  | -2.97797346 |
| 6  | 3.67828298  | -1.57900798 | -3.77617335 | 1         | -1.62181711 | 3.37179208  | -3.06567335 |
| 1  | 4.03128242  | -2.60680795 | -3.64277339 | 6         | -4.14611721 | 0.20329203  | -1.96947336 |
| 1  | 4.55068254  | -0.91940796 | -3.83567357 | 1         | -5.17521763 | 0.49749202  | -2.19007349 |
| 1  | 3.16888285  | -1.53540802 | -4.74577332 | 1         | -3.72111726 | -0.31390798 | -2.83097339 |
| 6  | 2.23778296  | 0.27589202  | -3.03777337 | 1         | -3.55731726 | 1.10129201  | -1.77197337 |
| 1  | 1.58608282  | 0.71499205  | -2.28017354 | 6         | -3.78511715 | -3.96980786 | 1.75112665  |
| 1  | 1.71078277  | 0.27579203  | -4.00017357 | 1         | -3.46431708 | -4.76270771 | 1.07302666  |

|   |            |             |             |   |             |             |            |
|---|------------|-------------|-------------|---|-------------|-------------|------------|
| 1 | 3.10468292 | 0.93959200  | -3.13017344 | 1 | -4.72301722 | -4.27310753 | 2.21922660 |
| 6 | 1.52128279 | -2.14860797 | -2.73017335 | 1 | -3.02311707 | -3.83120799 | 2.52142644 |
| 1 | 1.88738275 | -3.17070794 | -2.58597350 |   |             |             |            |

## I-2\_PL

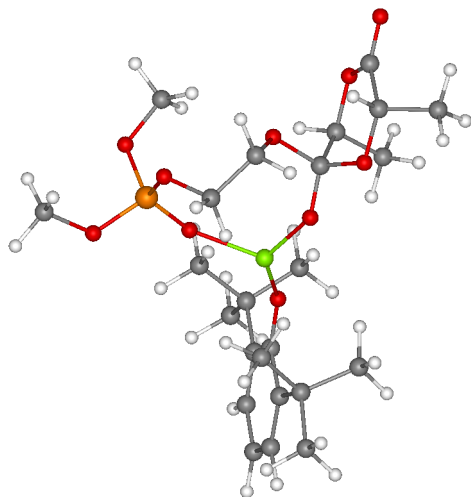

|                                              |                             |
|----------------------------------------------|-----------------------------|
| Zero-point vibrational energy                | 1638080.9 (Joules/Mol)      |
|                                              | 391.51073 (Kcal/Mol)        |
| Zero-point correction=                       | 0.623912 (Hartree/Particle) |
| Thermal correction to Energy=                | 0.664837                    |
| Thermal correction to Enthalpy=              | 0.665781                    |
| Thermal correction to Gibbs Free Energy=     | 0.547768                    |
| Sum of electronic and zero-point Energies=   | -2230.720964                |
| Sum of electronic and thermal Energies=      | -2230.680039                |
| Sum of electronic and thermal Enthalpies=    | -2230.679095                |
| Sum of electronic and thermal Free Energies= | -2230.797108                |

| cartesian |             |             |             |    |             |             |             |
|-----------|-------------|-------------|-------------|----|-------------|-------------|-------------|
| 12        | 0.03015167  | 0.08813065  | 0.30872402  | 1  | 0.31965166  | -0.37136933 | 2.52082396  |
| 8         | -0.53154832 | 4.41483021  | 0.79322404  | 1  | 1.52375162  | 0.85953069  | 1.91722405  |
| 8         | 1.67525172  | -0.50216937 | -0.29387599 | 1  | -1.34684825 | 6.14133024  | -0.04567598 |
| 6         | -1.13104832 | 5.72053051  | 0.93772405  | 8  | -0.43354833 | 2.00703073  | 0.11432403  |
| 1         | -0.39014834 | 6.32993031  | 1.45252407  | 15 | -1.32904840 | 3.20213079  | 0.17362402  |
| 1         | -2.04284835 | 5.65653038  | 1.53582406  | 8  | -2.65054822 | 2.98503065  | 1.02262402  |
| 6         | 2.98025155  | -0.50676930 | -0.01267598 | 8  | -3.51894832 | 0.39583066  | 0.10442402  |
| 6         | 3.93055177  | -0.26626936 | -1.04937601 | 6  | -2.83464837 | 1.87273073  | 1.94182408  |
| 6         | 5.28635120  | -0.25946936 | -0.70957595 | 6  | -3.85694838 | 0.90273070  | 1.38282406  |
| 1         | 6.03265190  | -0.07526934 | -1.47497594 | 1  | -3.19824839 | 2.31093073  | 2.87512398  |
| 6         | 5.72545147  | -0.48356935 | 0.59242404  | 1  | -1.88114834 | 1.37763071  | 2.12492394  |
| 6         | 4.79245186  | -0.74026930 | 1.59102404  | 1  | -3.97954822 | 0.09283065  | 2.11242390  |

|   |            |             |             |   |             |             |             |
|---|------------|-------------|-------------|---|-------------|-------------|-------------|
| 1 | 5.15265179 | -0.92676938 | 2.59772396  | 1 | -4.81754875 | 1.41693068  | 1.27062404  |
| 6 | 3.42145157 | -0.76586938 | 1.31932402  | 8 | -1.83554828 | 3.77253079  | -1.20757592 |
| 6 | 3.48625159 | -0.02966934 | -2.50387597 | 1 | 6.78765202  | -0.46706936 | 0.82392406  |
| 6 | 2.40775156 | -1.11846936 | 2.42112398  | 6 | -2.64794827 | 2.98203063  | -2.11437607 |
| 6 | 2.63345170 | 1.25093067  | -2.60547614 | 1 | -3.34274840 | 2.34563065  | -1.56457591 |
| 1 | 1.73815179 | 1.18673062  | -1.98527598 | 1 | -1.98794830 | 2.37903070  | -2.73967600 |
| 1 | 2.32335162 | 1.42013073  | -3.64427614 | 1 | -3.19144821 | 3.69853067  | -2.72817612 |
| 1 | 3.20805168 | 2.12503052  | -2.27947617 | 8 | -6.24664879 | -1.88366938 | -1.60197592 |
| 6 | 2.68925166 | -1.24426937 | -3.02187610 | 8 | -4.10284805 | -1.43916929 | -1.92197597 |
| 1 | 1.80745173 | -1.43356931 | -2.40847611 | 6 | -5.13544846 | -1.77676928 | -1.13047600 |
| 1 | 3.31235170 | -2.14516926 | -3.00757599 | 6 | -4.90524864 | -1.99956942 | 0.36352402  |
| 1 | 2.36765170 | -1.07486928 | -4.05717564 | 8 | -3.56744838 | -1.83126926 | 0.82562405  |
| 6 | 4.68225193 | 0.15723065  | -3.45397615 | 6 | -2.80334830 | -0.87516928 | 0.10622402  |
| 1 | 5.33915138 | -0.71906936 | -3.47077608 | 6 | -2.77324843 | -1.29756927 | -1.37337601 |
| 1 | 5.28555202 | 1.03523064  | -3.19807601 | 1 | -2.33734846 | -0.47796932 | -1.95377600 |
| 1 | 4.31195164 | 0.30513066  | -4.47467566 | 8 | -1.59694839 | -0.79346931 | 0.65202403  |
| 6 | 3.07845163 | -1.31236935 | 3.79232383  | 1 | -5.55514812 | -1.25586927 | 0.84642404  |
| 1 | 3.60145164 | -0.41056934 | 4.12862396  | 6 | -5.36734867 | -3.39146924 | 0.77692401  |
| 1 | 3.79305148 | -2.14066935 | 3.78182387  | 1 | -6.41274834 | -3.53566933 | 0.49942401  |
| 1 | 2.31475163 | -1.55316937 | 4.54062414  | 1 | -5.26174831 | -3.50016928 | 1.85922408  |
| 6 | 1.71765161 | -2.45666933 | 2.07502389  | 1 | -4.76004791 | -4.16096973 | 0.29312402  |
| 1 | 1.22045171 | -2.42356920 | 1.10332406  | 6 | -1.99244833 | -2.57936931 | -1.60717595 |
| 1 | 0.97345161 | -2.72066927 | 2.83602381  | 1 | -2.38924837 | -3.39326930 | -0.99547595 |
| 1 | 2.46195173 | -3.25816941 | 2.03672385  | 1 | -0.93864834 | -2.44786930 | -1.35227597 |
| 6 | 1.34955168 | 0.01643066  | 2.59812403  | 1 | -2.06264830 | -2.86096931 | -2.66087604 |
| 1 | 1.39515162 | 0.45683065  | 3.59942389  |   |             |             |             |

### TS-23\_PL

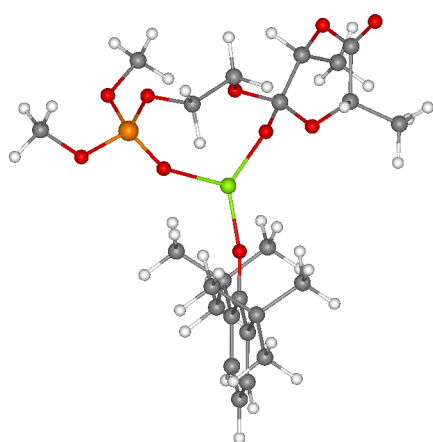

Zero-point vibrational energy

1635302.2 (Joules/Mol)

390.84660 (Kcal/Mol)

Zero-point correction=

0.622854 (Hartree/Particle)

|                                              |              |
|----------------------------------------------|--------------|
| Thermal correction to Energy=                | 0.663460     |
| Thermal correction to Enthalpy=              | 0.664404     |
| Thermal correction to Gibbs Free Energy=     | 0.547386     |
| Sum of electronic and zero-point Energies=   | -2230.713051 |
| Sum of electronic and thermal Energies=      | -2230.672444 |
| Sum of electronic and thermal Enthalpies=    | -2230.671500 |
| Sum of electronic and thermal Free Energies= | -2230.788518 |

|    |             |             |             | cartesian |             |             |             |
|----|-------------|-------------|-------------|-----------|-------------|-------------|-------------|
| 12 | -0.15403602 | 0.30497861  | -0.49860129 | 1         | 1.25136399  | 0.90477860  | 2.04599881  |
| 8  | -0.92023599 | 4.48237848  | 0.92329872  | 1         | 2.60346389  | 1.42187858  | 3.05299878  |
| 8  | 1.54946399  | -0.18152142 | -0.03280130 | 1         | -1.97023606 | 6.16457844  | 0.27729869  |
| 6  | -1.64513600 | 5.69677830  | 1.20839870  | 8         | -0.60823601 | 2.15157843  | 0.08619870  |
| 1  | -0.94193602 | 6.34517860  | 1.72809863  | 15        | -1.62033606 | 3.23737860  | 0.25349870  |
| 1  | -2.50313616 | 5.48617840  | 1.85089862  | 8         | -2.88543606 | 2.86427879  | 1.14459872  |
| 6  | 2.86996388  | -0.31912142 | 0.04369871  | 8         | -2.97833610 | 0.42727858  | -0.07650129 |
| 6  | 3.67596412  | -0.21222141 | -1.13140130 | 6         | -2.97843599 | 1.65297854  | 1.93999863  |
| 6  | 5.06026411  | -0.36272138 | -1.00350130 | 6         | -3.66723609 | 0.55597860  | 1.14869869  |
| 1  | 5.69566441  | -0.28682142 | -1.87960136 | 1         | -3.55603600 | 1.92607856  | 2.82579875  |
| 6  | 5.66236401  | -0.61232144 | 0.22489870  | 1         | -1.97663605 | 1.34267855  | 2.24709868  |
| 6  | 4.86746407  | -0.71932143 | 1.36179864  | 1         | -3.62413597 | -0.35362142 | 1.75619864  |
| 1  | 5.35526419  | -0.91702139 | 2.31049871  | 1         | -4.72093582 | 0.80647856  | 0.97179872  |
| 6  | 3.47766399  | -0.58052140 | 1.30969870  | 8         | -2.23143601 | 3.84777880  | -1.07150137 |
| 6  | 3.04976392  | 0.05677859  | -2.51180124 | 1         | 6.74156427  | -0.72452140 | 0.29579869  |
| 6  | 2.63466406  | -0.71072143 | 2.59189868  | 6         | -3.07773614 | 3.07927847  | -1.95990133 |
| 6  | 2.34836388  | 1.43207860  | -2.52600121 | 1         | -4.00013590 | 2.80497837  | -1.44670129 |
| 1  | 1.66866398  | 1.57047856  | -1.68070138 | 1         | -2.55763602 | 2.18257856  | -2.29870129 |
| 1  | 1.78866386  | 1.57727861  | -3.45850110 | 1         | -3.28963614 | 3.73827839  | -2.80050111 |
| 1  | 3.08726406  | 2.23677874  | -2.44960117 | 8         | -5.56173563 | -3.15702152 | 0.92699873  |
| 6  | 2.07186389  | -1.07522142 | -2.89290118 | 8         | -4.89823580 | -1.81002140 | -0.70580125 |
| 1  | 1.29156399  | -1.23642147 | -2.14710116 | 6         | -4.65213585 | -2.59902143 | 0.35509869  |
| 1  | 2.61446404  | -2.02152157 | -2.99010110 | 6         | -3.22213602 | -2.72092152 | 0.87129873  |
| 1  | 1.59186399  | -0.86342144 | -3.85630131 | 8         | -2.27963591 | -1.77292144 | 0.35819870  |
| 6  | 4.10016441  | 0.10657859  | -3.63620114 | 6         | -2.61603594 | -0.86902142 | -0.69120127 |
| 1  | 4.63726425  | -0.84182143 | -3.73920131 | 6         | -3.79533601 | -1.36892140 | -1.53460133 |
| 1  | 4.83506441  | 0.90407860  | -3.48470116 | 1         | -4.19653606 | -0.49632144 | -2.05260110 |
| 1  | 3.59886384  | 0.30267859  | -4.59110165 | 8         | -1.55143607 | -0.61162144 | -1.43220139 |
| 6  | 3.49796391  | -1.00652146 | 3.83109879  | 1         | -3.31523609 | -2.52632141 | 1.94669867  |
| 1  | 4.21816397  | -0.20752141 | 4.03709841  | 6         | -2.68083596 | -4.14082146 | 0.71629870  |
| 1  | 4.04716396  | -1.94922149 | 3.73669887  | 1         | -3.35113597 | -4.84682131 | 1.21179867  |
| 1  | 2.84926391  | -1.09482145 | 4.71009874  | 1         | -1.69463611 | -4.19522142 | 1.18279862  |

|   |            |             |            |   |             |             |             |
|---|------------|-------------|------------|---|-------------|-------------|-------------|
| 6 | 1.63556397 | -1.87892139 | 2.46209884 | 1 | -2.57853603 | -4.42552137 | -0.33260131 |
| 1 | 0.97256398 | -1.75292146 | 1.60519862 | 6 | -3.42183614 | -2.42952156 | -2.55460119 |
| 1 | 1.02446389 | -1.96062148 | 3.37019873 | 1 | -2.96713614 | -3.30722141 | -2.09150124 |
| 1 | 2.17146397 | -2.82572126 | 2.33309889 | 1 | -2.69883609 | -2.01272154 | -3.25730133 |
| 6 | 1.88966393 | 0.60907859  | 2.87999868 | 1 | -4.31663609 | -2.74422121 | -3.09830117 |
| 1 | 1.26986396 | 0.50917858  | 3.78069878 |   |             |             |             |

### I-3\_PL

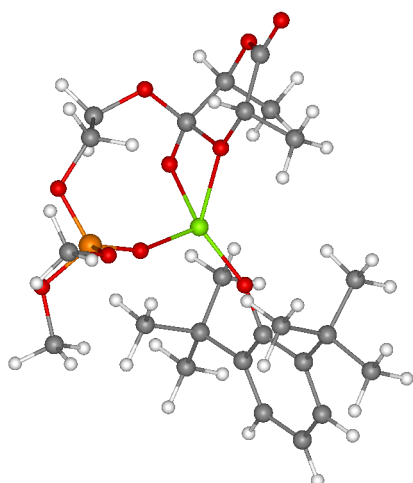

|                                              |                             |
|----------------------------------------------|-----------------------------|
| Zero-point vibrational energy                | 1636850.4 (Joules/Mol)      |
|                                              | 391.21664 (Kcal/Mol)        |
| Zero-point correction                        | XXX (Hartree/Particle)      |
| Zero-point correction=                       | 0.623443 (Hartree/Particle) |
| Thermal correction to Energy=                | 0.664748                    |
| Thermal correction to Enthalpy=              | 0.665692                    |
| Thermal correction to Gibbs Free Energy=     | 0.547195                    |
| Sum of electronic and zero-point Energies=   | -2230.728551                |
| Sum of electronic and thermal Energies=      | -2230.687246                |
| Sum of electronic and thermal Enthalpies=    | -2230.686302                |
| Sum of electronic and thermal Free Energies= | -2230.804799                |

| cartesian |             |             |             |   |            |             |             |
|-----------|-------------|-------------|-------------|---|------------|-------------|-------------|
| 8         | -1.18535161 | -0.49704006 | 0.11351198  | 8 | 2.33434844 | -1.17964005 | -0.12448803 |
| 6         | -2.50895166 | -0.40464005 | 0.00391197  | 6 | 2.75974846 | -1.20234013 | 1.32971191  |
| 6         | -3.31475163 | -0.13094005 | 1.15391195  | 6 | 3.01224852 | -2.67714000 | 1.66081190  |
| 6         | -4.70045185 | -0.03814004 | 0.98951197  | 8 | 3.97694826 | -3.27234006 | 0.75761199  |
| 1         | -5.33305168 | 0.16795996  | 1.84651196  | 6 | 4.08684826 | -2.89684010 | -0.52398801 |
| 6         | -5.30935192 | -0.20744005 | -0.24888802 | 6 | 3.24484825 | -1.74234009 | -1.07278800 |
| 6         | -4.51915169 | -0.48474005 | -1.35938811 | 8 | 4.88204813 | -3.44774008 | -1.25318801 |
| 1         | -5.01165152 | -0.62284005 | -2.31598806 | 1 | 3.98264837 | -0.97913998 | -1.35128808 |
| 6         | -3.12835169 | -0.59254003 | -1.27118802 | 1 | 3.50864840 | -2.70654011 | 2.63301206  |

---

|    |             |             |             |    |             |             |             |
|----|-------------|-------------|-------------|----|-------------|-------------|-------------|
| 6  | -2.69485140 | 0.05405996  | 2.55151200  | 8  | 2.11224842  | 3.26365995  | -1.71598804 |
| 6  | -2.29915142 | -0.91633999 | -2.52738810 | 6  | 2.91334820  | 4.37836027  | -2.16268802 |
| 6  | -1.78305161 | 1.29865992  | 2.56971192  | 1  | 2.88784838  | 4.34656000  | -3.25058794 |
| 1  | -1.05265152 | 1.28845990  | 1.75761199  | 1  | 3.94184828  | 4.27506018  | -1.80978811 |
| 1  | -1.24185157 | 1.37805986  | 3.51991200  | 1  | 2.49024820  | 5.32046032  | -1.80668807 |
| 1  | -2.38445139 | 2.20625997  | 2.44401193  | 8  | 1.06444836  | 1.75325990  | -0.03718802 |
| 6  | -1.91835153 | -1.21084011 | 2.97131205  | 15 | 1.91564846  | 2.97016001  | -0.16428803 |
| 1  | -1.14185154 | -1.47764003 | 2.25411201  | 8  | 3.34454823  | 2.90256000  | 0.51131201  |
| 1  | -2.60375166 | -2.06194019 | 3.04671192  | 8  | 4.02614832  | -0.55494004 | 1.42421198  |
| 1  | -1.44735157 | -1.06694007 | 3.95101190  | 6  | 4.10774851  | 1.65935993  | 0.39871198  |
| 6  | -3.75575161 | 0.28935996  | 3.64211202  | 6  | 4.00054836  | 0.83855999  | 1.68971193  |
| 1  | -4.44345188 | -0.55744004 | 3.73511195  | 1  | 5.12934828  | 1.97615993  | 0.18581197  |
| 1  | -4.34565163 | 1.19445992  | 3.46281195  | 1  | 3.74304867  | 1.07205987  | -0.44608805 |
| 1  | -3.25615168 | 0.41215995  | 4.60971212  | 1  | 4.85354853  | 1.03915989  | 2.34221196  |
| 6  | -3.17615175 | -1.11234009 | -3.77678800 | 1  | 3.08624840  | 1.10405993  | 2.22651196  |
| 1  | -3.74565172 | -0.21194005 | -4.03058815 | 8  | 1.34294844  | 4.27416039  | 0.52141201  |
| 1  | -3.87905169 | -1.94444013 | -3.66408801 | 6  | -0.05775160 | 4.61276007  | 0.35601199  |
| 1  | -2.53425169 | -1.34274006 | -4.63468790 | 1  | -0.68635154 | 3.79235983  | 0.70361197  |
| 6  | -1.52105153 | -2.23254013 | -2.32638812 | 1  | -0.27275157 | 4.83736038  | -0.69118798 |
| 1  | -0.85895157 | -2.17944002 | -1.46118808 | 1  | -0.21775156 | 5.49756002  | 0.96891201  |
| 1  | -0.92185152 | -2.46304011 | -3.21628809 | 6  | 2.47374821  | -2.17063999 | -2.31178808 |
| 1  | -2.21585178 | -3.06394005 | -2.16538811 | 1  | 1.94294846  | -1.31394005 | -2.73478794 |
| 6  | -1.33505154 | 0.24325997  | -2.84948802 | 1  | 1.74314845  | -2.94573998 | -2.06888795 |
| 1  | -1.89815152 | 1.15355992  | -3.08448815 | 1  | 3.16894865  | -2.56194019 | -3.05638814 |
| 1  | -0.71585155 | -0.00174005 | -3.72178817 | 6  | 1.74954844  | -3.51613998 | 1.69201195  |
| 1  | -0.67665160 | 0.47225994  | -2.01018810 | 1  | 1.21734846  | -3.47943997 | 0.73711193  |
| 12 | 0.58104843  | -0.12514004 | 0.48641199  | 1  | 1.08294845  | -3.15514016 | 2.47731185  |
| 1  | -6.38965178 | -0.13204005 | -0.34638801 | 1  | 2.00984859  | -4.55694008 | 1.90081191  |
| 8  | 1.76454842  | -0.63444000 | 1.96641195  |    |             |             |             |

---

### TS-34\_PL

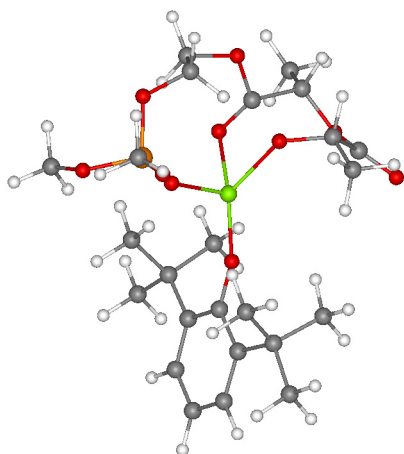

|                                              |                             |
|----------------------------------------------|-----------------------------|
| Zero-point vibrational energy                | 1634251.2 (Joules/Mol)      |
|                                              | 390.59540 (Kcal/Mol)        |
| Zero-point correction=                       | 0.622453 (Hartree/Particle) |
| Thermal correction to Energy=                | 0.663365                    |
| Thermal correction to Enthalpy=              | 0.664310                    |
| Thermal correction to Gibbs Free Energy=     | 0.547005                    |
| Sum of electronic and zero-point Energies=   | -2230.725698                |
| Sum of electronic and thermal Energies=      | -2230.684786                |
| Sum of electronic and thermal Enthalpies=    | -2230.683842                |
| Sum of electronic and thermal Free Energies= | -2230.801147                |

| cartesian |             |             |             |    |             |             |             |  |  |
|-----------|-------------|-------------|-------------|----|-------------|-------------|-------------|--|--|
| 12        | -0.56152666 | 0.32094792  | 0.04691336  | 1  | 1.31957340  | 2.01294804  | 3.40881324  |  |  |
| 8         | -2.51862669 | -3.10005212 | -1.54468668 | 1  | 1.27187347  | 1.86434782  | 1.64261341  |  |  |
| 8         | 1.27987337  | 0.23234792  | -0.04408664 | 1  | -3.07052660 | -5.10855246 | -1.45698667 |  |  |
| 6         | -3.39902663 | -4.17985201 | -1.92608666 | 8  | -1.66152668 | 1.24844790  | 1.47081339  |  |  |
| 1         | -3.31922674 | -4.25685215 | -3.00908685 | 6  | -2.53332663 | 1.88524783  | 0.81191337  |  |  |
| 1         | -4.42902660 | -3.95215201 | -1.64218664 | 8  | -2.00382662 | 1.32854784  | -0.93668664 |  |  |
| 6         | 2.54677320  | -0.14925209 | 0.10201336  | 6  | -2.09972668 | 2.33624792  | -1.91468668 |  |  |
| 6         | 3.31467319  | -0.52295208 | -1.04578662 | 6  | -2.47422671 | 3.40144801  | 0.60531336  |  |  |
| 6         | 4.63727331  | -0.93505204 | -0.85918665 | 8  | -1.32172656 | 3.82034802  | -0.13318664 |  |  |
| 1         | 5.23747349  | -1.22555208 | -1.71478665 | 6  | -1.25112665 | 3.52914810  | -1.46638668 |  |  |
| 6         | 5.22517347  | -0.98255205 | 0.40011337  | 8  | -1.38472676 | -1.53175211 | 0.07421336  |  |  |
| 6         | 4.47957325  | -0.59725207 | 1.50821340  | 15 | -2.43662667 | -2.57455206 | -0.05968664 |  |  |
| 1         | 4.95897341  | -0.62705207 | 2.48111320  | 8  | -3.88882661 | -2.07565212 | 0.38071337  |  |  |
| 6         | 3.15107322  | -0.17415208 | 1.39921331  | 8  | -3.85292673 | 1.52694786  | 0.87971336  |  |  |
| 6         | 2.72467327  | -0.45925209 | -2.46638680 | 6  | -4.28612661 | -0.71105206 | 0.05741337  |  |  |
| 6         | 2.38057327  | 0.25784791  | 2.66031313  | 6  | -4.13012648 | 0.18564792  | 1.28831339  |  |  |
| 6         | 2.29747319  | 0.98514795  | -2.79398680 | 1  | -5.32302666 | -0.78285205 | -0.27378663 |  |  |
| 1         | 1.57697344  | 1.36914790  | -2.07118678 | 1  | -3.67552662 | -0.30955210 | -0.75458664 |  |  |
| 1         | 1.85557318  | 1.03754783  | -3.79698682 | 1  | -5.05092669 | 0.23524792  | 1.87231338  |  |  |
| 1         | 3.16547322  | 1.65284789  | -2.77798676 | 1  | -3.32282662 | -0.18185209 | 1.92451334  |  |  |
| 6         | 1.53347325  | -1.42865217 | -2.60408664 | 8  | -2.22532654 | -3.88305211 | 0.80001336  |  |  |
| 1         | 0.75457340  | -1.22905207 | -1.86698663 | 1  | 6.25687313  | -1.30645216 | 0.51531339  |  |  |
| 1         | 1.86407328  | -2.46325207 | -2.45898676 | 6  | -1.93012667 | -3.79985189 | 2.21511316  |  |  |
| 1         | 1.08977342  | -1.35385215 | -3.60498667 | 1  | -1.06582665 | -3.15505195 | 2.38071322  |  |  |
| 6         | 3.74217319  | -0.87005204 | -3.54578686 | 1  | -1.70292664 | -4.81695223 | 2.52921319  |  |  |
| 1         | 4.08397341  | -1.90385211 | -3.42518663 | 1  | -2.80352664 | -3.42775202 | 2.75491333  |  |  |
| 1         | 4.62017345  | -0.21575208 | -3.55868673 | 8  | -0.51002663 | 4.16434765  | -2.17458677 |  |  |
| 1         | 3.26817322  | -0.79725206 | -4.53138685 | 6  | -2.41342664 | 4.10604763  | 1.95101333  |  |  |

|   |            |             |            |   |             |            |             |
|---|------------|-------------|------------|---|-------------|------------|-------------|
| 6 | 3.25017333 | 0.21144792  | 3.92971325 | 6 | -1.69022655 | 1.83954787 | -3.29188681 |
| 1 | 4.11317348 | 0.88174796  | 3.86111331 | 1 | -3.14732671 | 2.67964792 | -1.97238660 |
| 1 | 3.61407328 | -0.79755205 | 4.15171337 | 1 | -3.38032675 | 3.70084810 | 0.06881337  |
| 1 | 2.65147328 | 0.53784794  | 4.78791332 | 1 | -1.79462671 | 2.63574791 | -4.03278685 |
| 6 | 1.19987345 | -0.70195204 | 2.91641331 | 1 | -2.32892680 | 0.99954796 | -3.57838678 |
| 1 | 0.55737334 | -0.80545205 | 2.04031324 | 1 | -0.64892662 | 1.51184785 | -3.29328680 |
| 1 | 0.58477336 | -0.35215211 | 3.75451326 | 1 | -2.38812661 | 5.18664789 | 1.79421341  |
| 1 | 1.57577324 | -1.70255208 | 3.15981317 | 1 | -1.51512671 | 3.80214810 | 2.49161315  |
| 6 | 1.89517331 | 1.71534789  | 2.52381325 | 1 | -3.29262662 | 3.85604811 | 2.55021334  |
| 1 | 2.75437331 | 2.38904810  | 2.43681335 |   |             |            |             |

#### I-4\_PL

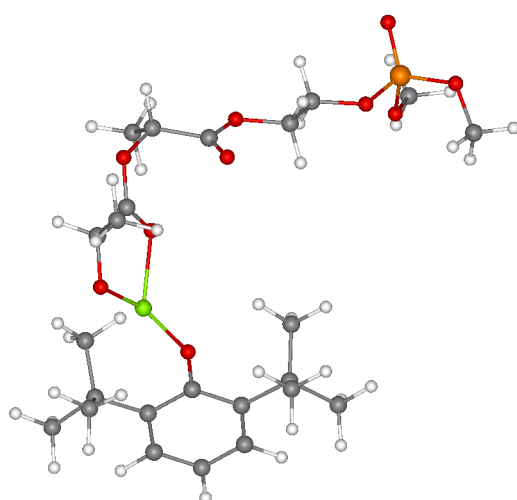

|                                              |                             |
|----------------------------------------------|-----------------------------|
| Zero-point vibrational energy                | 1633166.1 (Joules/Mol)      |
|                                              | 390.33606 (Kcal/Mol)        |
| Zero-point correction=                       | 0.622040 (Hartree/Particle) |
| Thermal correction to Energy=                | 0.664669                    |
| Thermal correction to Enthalpy=              | 0.665614                    |
| Thermal correction to Gibbs Free Energy=     | 0.538677                    |
| Sum of electronic and zero-point Energies=   | -2230.717129                |
| Sum of electronic and thermal Energies=      | -2230.674499                |
| Sum of electronic and thermal Enthalpies=    | -2230.673555                |
| Sum of electronic and thermal Free Energies= | -2230.800491                |

| cartesian |             |             |             |   |             |             |             |
|-----------|-------------|-------------|-------------|---|-------------|-------------|-------------|
| 12        | -3.49188519 | 2.15444803  | -0.57736975 | 6 | 0.29411629  | 4.82924891  | 0.58003026  |
| 8         | -3.45548511 | 0.30874813  | -0.67226970 | 8 | -0.94948345 | 5.25834894  | -0.01686999 |
| 6         | -3.96098518 | -0.81945193 | -0.16777006 | 6 | -1.88008475 | 4.35964870  | -0.29216987 |
| 6         | -5.07467985 | -0.77965200 | 0.72543031  | 6 | -3.13578510 | 4.88324881  | -0.98876971 |
| 6         | -5.56427956 | -1.98135138 | 1.24532902  | 1 | -5.38717985 | -4.12725115 | 1.32462895  |



---

|   |             |             |             |    |             |             |             |
|---|-------------|-------------|-------------|----|-------------|-------------|-------------|
| 1 | -6.41037989 | -1.97475147 | 1.92522895  | 8  | -1.76178479 | 3.16094851  | 0.00903002  |
| 6 | -4.99307966 | -3.20335126 | 0.90883023  | 1  | 0.89031535  | 5.74714899  | 0.56633031  |
| 6 | -3.91498518 | -3.23285127 | 0.02762999  | 1  | -3.50648522 | 5.69694901  | -0.33506984 |
| 1 | -3.48968506 | -4.19795132 | -0.22697009 | 8  | 0.75101584  | 3.73654866  | -1.54137099 |
| 6 | -3.37708521 | -2.06965137 | -0.52996987 | 8  | 6.69432020  | -0.38645169 | -1.07597101 |
| 6 | -5.73687983 | 0.56004810  | 1.08292902  | 6  | 5.95202017  | -1.31365216 | -1.88887107 |
| 6 | -2.19538450 | -2.14245129 | -1.51347101 | 1  | 6.66852045  | -1.73885167 | -2.59106898 |
| 6 | -6.33277988 | 1.20734811  | -0.19147007 | 1  | 5.16362047  | -0.78875196 | -2.43246889 |
| 1 | -5.64547968 | 1.22474813  | -1.04357076 | 1  | 5.51882029  | -2.10655141 | -1.27387106 |
| 1 | -6.68187952 | 2.22834802  | -0.00146998 | 8  | 6.93902016  | 1.26064813  | 0.87783027  |
| 1 | -7.18827963 | 0.61644804  | -0.53276986 | 15 | 6.03692055  | 0.32504815  | 0.18722996  |
| 6 | -4.71688080 | 1.49404788  | 1.79372895  | 8  | 4.68862057  | 0.93144822  | -0.44646978 |
| 1 | -3.67668509 | 1.29794812  | 1.50262892  | 8  | 2.01771498  | 3.24404860  | 0.26703021  |
| 1 | -4.72068071 | 1.31194806  | 2.87293100  | 6  | 3.86301947  | 1.77384794  | 0.37373021  |
| 1 | -4.96337986 | 2.55644870  | 1.65692902  | 6  | 2.82661486  | 2.37604833  | -0.55396980 |
| 6 | -6.91607952 | 0.40714809  | 2.05953097  | 1  | 4.47132015  | 2.55534863  | 0.83753031  |
| 1 | -6.60997963 | -0.05015180 | 3.00573111  | 1  | 3.38431621  | 1.17504823  | 1.15442896  |
| 1 | -7.72527981 | -0.19335181 | 1.63282895  | 1  | 3.29831600  | 2.95694876  | -1.34997106 |
| 1 | -7.32917976 | 1.39594805  | 2.29043102  | 1  | 2.19661498  | 1.60684788  | -1.00546980 |
| 6 | -1.74318480 | -3.58995104 | -1.77127099 | 8  | 5.42882013  | -0.84775198 | 1.11042893  |
| 1 | -2.53988457 | -4.20085096 | -2.20926905 | 6  | 6.25552034  | -1.40945232 | 2.14873099  |
| 1 | -1.39068437 | -4.08485126 | -0.85966969 | 1  | 6.69662046  | -0.61655188 | 2.75603104  |
| 1 | -0.90958357 | -3.58555126 | -2.48236895 | 1  | 7.04662037  | -2.02675128 | 1.71412897  |
| 6 | -0.97668350 | -1.38495219 | -0.94736969 | 1  | 5.59782028  | -2.03045130 | 2.75673103  |
| 1 | -1.20788395 | -0.33305168 | -0.77456969 | 6  | -2.75378489 | 5.51264906  | -2.33896899 |
| 1 | -0.13488387 | -1.44485223 | -1.64877105 | 1  | -2.06258488 | 6.35224867  | -2.22416902 |
| 1 | -0.65558386 | -1.82745171 | 0.00253001  | 1  | -3.67298508 | 5.86624908  | -2.81116891 |
| 6 | -2.60108495 | -1.54905200 | -2.87846899 | 1  | -2.29778457 | 4.76424885  | -2.99336910 |
| 1 | -3.43458509 | -2.11385131 | -3.31046891 | 6  | 0.13821614  | 4.36374855  | 2.02063107  |
| 1 | -1.75988483 | -1.60175192 | -3.58066893 | 1  | -0.37228391 | 3.40344858  | 2.08553100  |
| 1 | -2.90798521 | -0.50665176 | -2.78516889 | 1  | -0.42668396 | 5.11244869  | 2.58193111  |
| 8 | -4.05528450 | 3.86974859  | -1.11367106 | 1  | 1.12541509  | 4.26804829  | 2.47643089  |
| 6 | 1.00991511  | 3.86414862  | -0.36816978 |    |             |             |             |

---

## I-5\_PLL

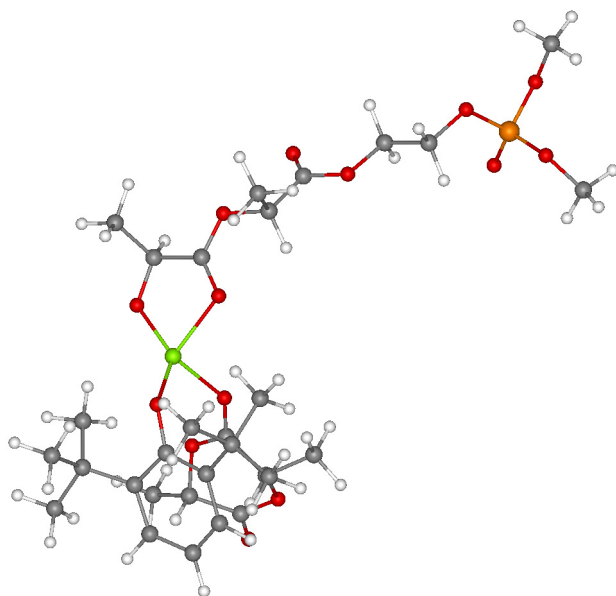

|                                              |                             |
|----------------------------------------------|-----------------------------|
| Zero-point vibrational energy                | 2007393.5 (Joules/Mol)      |
|                                              | 479.77857 (Kcal/Mol)        |
| Zero-point correction=                       | 0.764576 (Hartree/Particle) |
| Thermal correction to Energy=                | 0.818377                    |
| Thermal correction to Enthalpy=              | 0.819321                    |
| Thermal correction to Gibbs Free Energy=     | 0.667725                    |
| Sum of electronic and zero-point Energies=   | -2764.827696                |
| Sum of electronic and thermal Energies=      | -2764.773896                |
| Sum of electronic and thermal Enthalpies=    | -2764.772951                |
| Sum of electronic and thermal Free Energies= | -2764.924547                |

| cartesian |            |             |             |   |             |             |             |
|-----------|------------|-------------|-------------|---|-------------|-------------|-------------|
| 12        | 1.67067671 | -1.24639022 | 0.80215716  | 6 | 1.12657666  | 3.34460974  | -0.19014284 |
| 8         | 2.85827684 | -1.32649028 | -0.69464284 | 1 | 1.24117661  | 4.26980972  | -0.75774288 |
| 6         | 3.66077685 | -0.35919032 | -1.11964285 | 1 | 0.31907672  | 3.46920967  | 0.53465712  |
| 6         | 4.90087652 | -0.10589030 | -0.44484282 | 1 | 0.87117666  | 2.53670979  | -0.87414289 |
| 6         | 5.61117649 | 1.05300975  | -0.78384280 | 6 | 4.98557663  | 2.42580962  | 3.75675726  |
| 1         | 6.54347658 | 1.28730977  | -0.27794284 | 1 | 4.29397631  | 2.61400962  | 4.58035707  |
| 6         | 5.18347645 | 1.91010976  | -1.79764295 | 1 | 5.82087660  | 3.12200975  | 3.84245706  |
| 6         | 4.07427645 | 1.54960978  | -2.56354284 | 1 | 5.36057663  | 1.40330970  | 3.82765722  |
| 1         | 3.81617665 | 2.17400980  | -3.41324282 | 8 | 1.34677672  | -2.36619020 | 2.30045724  |
| 6         | 3.31587672 | 0.40920970  | -2.27954292 | 6 | -4.28292322 | -1.83269024 | 1.12015724  |
| 6         | 5.51627636 | -1.15659022 | 0.50425714  | 6 | -2.99932313 | -2.22319031 | 0.39475715  |
| 6         | 2.21887684 | -0.06729031 | -3.25284290 | 8 | -2.09352326 | -2.71079016 | 1.40155721  |
| 6         | 5.77707672 | -2.43879032 | -0.31604284 | 6 | -0.82072330 | -2.34949017 | 1.33485711  |
| 1         | 4.84757662 | -2.82279038 | -0.74234283 | 6 | 0.08597672  | -2.88039017 | 2.44495726  |

---

|   |            |             |             |    |              |             |             |
|---|------------|-------------|-------------|----|--------------|-------------|-------------|
| 1 | 6.21017647 | -3.21799016 | 0.32325715  | 8  | -0.38172328  | -1.61469030 | 0.43745714  |
| 1 | 6.47787666 | -2.24219036 | -1.13434279 | 1  | -2.57622313  | -1.32539022 | -0.06264284 |
| 6 | 4.62557650 | -1.52079022 | 1.71155715  | 1  | -0.40042329  | -2.54619026 | 3.38295722  |
| 1 | 3.83507657 | -2.22409034 | 1.44395721  | 8  | -4.49992323  | -1.96359038 | 2.29955721  |
| 1 | 4.18377638 | -0.63869035 | 2.18635702  | 8  | -10.30252266 | 1.37360978  | 1.09515715  |
| 1 | 5.22057676 | -2.02699018 | 2.48075724  | 6  | -11.39162254 | 0.67560971  | 0.46495718  |
| 6 | 6.86987638 | -0.68899035 | 1.06715715  | 1  | -12.26862335 | 0.86560965  | 1.08295715  |
| 1 | 6.77557659 | 0.20550969  | 1.69485712  | 1  | -11.18272305 | -0.39579031 | 0.43295717  |
| 1 | 7.59977674 | -0.47799030 | 0.27945715  | 1  | -11.56072330 | 1.05450964  | -0.54634285 |
| 1 | 7.29287672 | -1.48049033 | 1.69435716  | 8  | -7.86922359  | 2.18420982  | 1.22465718  |
| 6 | 2.14497685 | 0.81600964  | -4.50994301 | 15 | -8.86772251  | 1.46920967  | 0.41175717  |
| 1 | 3.09697676 | 0.84900975  | -5.04984283 | 8  | -8.56712341  | -0.06989031 | 0.06025717  |
| 1 | 1.84307671 | 1.84450972  | -4.28114271 | 8  | -5.15252352  | -1.30319023 | 0.23395717  |
| 1 | 1.39567661 | 0.40550971  | -5.19554281 | 6  | -7.25512362  | -0.43659028 | -0.40384281 |
| 6 | 0.81407672 | -0.06829031 | -2.62344289 | 6  | -6.41272354  | -0.86759031 | 0.78405714  |
| 1 | 0.74747676 | -0.75759029 | -1.78304291 | 1  | -6.78212357  | 0.39170969  | -0.93904281 |
| 1 | 0.07147670 | -0.38009033 | -3.36834288 | 1  | -7.39782333  | -1.26379025 | -1.10214281 |
| 1 | 0.52927667 | 0.93160975  | -2.27964282 | 1  | -6.25052357  | -0.03729030 | 1.47475719  |
| 6 | 2.56307673 | -1.49879026 | -3.71784282 | 1  | -6.88672352  | -1.69079030 | 1.32355714  |
| 1 | 3.53287673 | -1.51679027 | -4.22654295 | 8  | -9.10092258  | 2.07350969  | -1.06394279 |
| 1 | 1.80497670 | -1.85999036 | -4.42364264 | 6  | -9.07162285  | 3.50480962  | -1.23214281 |
| 1 | 2.60507679 | -2.18769026 | -2.87204289 | 1  | -8.18372345  | 3.92750978  | -0.75764287 |
| 1 | 5.75407648 | 2.80320978  | -2.04124284 | 1  | -9.97082329  | 3.95640969  | -0.80424285 |
| 8 | 4.15387630 | 4.99610996  | 2.85985708  | 1  | -9.04702282  | 3.68340969  | -2.30694294 |
| 8 | 2.74557686 | 4.15410995  | 1.35545719  | 6  | 0.06387675   | -4.41949034 | 2.44295716  |
| 6 | 3.74777675 | 4.03840971  | 2.25215721  | 1  | -0.94012332  | -4.82329035 | 2.60365725  |
| 6 | 4.30097675 | 2.63090968  | 2.42495728  | 1  | 0.71827668   | -4.76089048 | 3.24815726  |
| 8 | 3.22927690 | 1.64790976  | 2.32555723  | 1  | 0.46387672   | -4.80449009 | 1.49925721  |
| 6 | 2.39027667 | 1.74440968  | 1.30735719  | 6  | -3.21722317  | -3.29789019 | -0.66314286 |
| 6 | 2.43197680 | 3.02880979  | 0.50805718  | 1  | -3.60712314  | -4.21259022 | -0.20954284 |
| 1 | 3.23697686 | 2.89990973  | -0.23344284 | 1  | -2.26912332  | -3.52429032 | -1.15614283 |
| 8 | 1.62137675 | 0.82360971  | 1.05385709  | 1  | -3.92422318  | -2.94389033 | -1.41574287 |
| 1 | 4.98957634 | 2.42680979  | 1.59465718  |    |              |             |             |

---

# I-5\_PLP

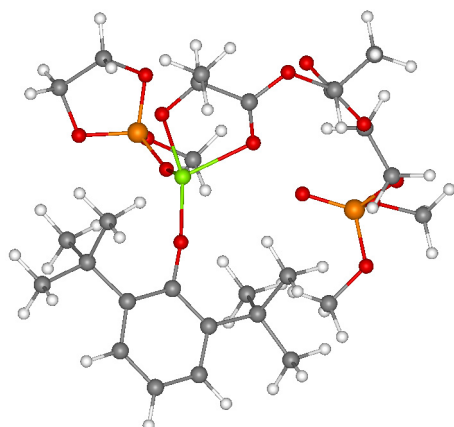

|                                              |                             |
|----------------------------------------------|-----------------------------|
| Zero-point vibrational energy                | 1939469.4 (Joules/Mol)      |
|                                              | 463.54431 (Kcal/Mol)        |
| Zero-point correction=                       | 0.738705 (Hartree/Particle) |
| Thermal correction to Energy=                | 0.791599                    |
| Thermal correction to Enthalpy=              | 0.792544                    |
| Thermal correction to Gibbs Free Energy=     | 0.642759                    |
| Sum of electronic and zero-point Energies=   | -2991.317977                |
| Sum of electronic and thermal Energies=      | -2991.265082                |
| Sum of electronic and thermal Enthalpies=    | -2991.264138                |
| Sum of electronic and thermal Free Energies= | -2991.413923                |

|   |             |             |             | cartesian |             |             |             |
|---|-------------|-------------|-------------|-----------|-------------|-------------|-------------|
| 8 | 2.20130348  | -0.79025316 | 0.15639110  | 6         | -2.08059669 | 1.18014681  | -3.32890892 |
| 6 | 2.80280352  | -1.97205317 | 0.15799110  | 1         | -2.55339646 | 0.84734678  | -4.25000906 |
| 6 | 2.07160354  | -3.14145303 | 0.54179108  | 1         | -2.76139665 | 1.81614673  | -2.76520896 |
| 6 | 2.73060346  | -4.37415314 | 0.54139107  | 1         | -1.76839674 | 0.32704681  | -2.72930884 |
| 1 | 2.19560337  | -5.27295351 | 0.82999104  | 1         | 3.13010335  | 3.76394701  | -3.68920898 |
| 6 | 4.06850338  | -4.49465322 | 0.18049107  | 1         | 1.66360331  | 4.28584671  | -4.57530880 |
| 6 | 4.77260303  | -3.35475302 | -0.19290891 | 12        | 1.52190328  | 0.92304683  | -0.05890891 |
| 1 | 5.81530333  | -3.46755314 | -0.47130889 | 8         | 2.21060348  | 2.69804692  | 0.27819109  |
| 6 | 4.17950296  | -2.08895302 | -0.21780892 | 6         | -2.50459647 | 2.50444698  | 2.04409099  |
| 6 | 0.58920336  | -3.06155300 | 0.95039111  | 6         | -1.50119674 | 2.55104685  | 3.19539094  |
| 6 | 5.00630331  | -0.86105323 | -0.64170891 | 8         | -0.31409666 | 3.24184680  | 2.75909114  |
| 6 | -0.26049668 | -2.52895308 | -0.22150892 | 6         | 0.42020336  | 2.62704682  | 1.83679104  |
| 1 | 0.08870333  | -1.55645323 | -0.56950891 | 6         | 1.64270329  | 3.38434696  | 1.32189107  |
| 1 | -1.31189668 | -2.43335319 | 0.08059110  | 8         | 0.12260333  | 1.50354683  | 1.41619098  |
| 1 | -0.21339667 | -3.22175312 | -1.06940889 | 1         | -1.24009669 | 1.52874672  | 3.47629094  |
| 6 | 0.42300335  | -2.16455317 | 2.19379115  | 1         | 1.24080324  | 4.36954689  | 1.01059103  |
| 1 | 0.79990327  | -1.15725327 | 2.01629114  | 8         | -2.57449651 | 3.32184696  | 1.15689099  |
| 1 | 0.97270334  | -2.58695316 | 3.04239106  | 8         | -7.00179672 | -0.84895325 | -1.83090901 |

---

|    |             |             |             |    |             |             |             |
|----|-------------|-------------|-------------|----|-------------|-------------|-------------|
| 1  | -0.63519669 | -2.09505320 | 2.47829103  | 6  | -8.17509651 | -1.41845322 | -1.22120893 |
| 6  | 0.00700334  | -4.43705320 | 1.32089102  | 1  | -8.96269703 | -1.36015320 | -1.97180891 |
| 1  | 0.51780331  | -4.88725328 | 2.17879105  | 1  | -8.45649719 | -0.84085321 | -0.33820891 |
| 1  | 0.04860333  | -5.14495325 | 0.48599112  | 1  | -7.99979687 | -2.46165299 | -0.94650888 |
| 1  | -1.04769671 | -4.31875324 | 1.59639108  | 8  | -4.51309681 | -0.24995318 | -1.88690901 |
| 6  | 6.45980310  | -1.22375321 | -0.99600887 | 15 | -5.58319664 | -0.90545321 | -1.11170888 |
| 1  | 6.52160311  | -1.92935312 | -1.83140898 | 8  | -5.92829704 | -0.30065319 | 0.33499110  |
| 1  | 6.99340296  | -0.31475320 | -1.29720891 | 8  | -3.32719660 | 1.44834673  | 2.18299103  |
| 1  | 6.99950314  | -1.64985323 | -0.14350891 | 6  | -4.87399673 | -0.10835320 | 1.29789102  |
| 6  | 5.08590317  | 0.16094682  | 0.51059109  | 6  | -4.32059669 | 1.29814672  | 1.14999104  |
| 1  | 4.10230303  | 0.50324678  | 0.83219105  | 1  | -4.08419657 | -0.85325325 | 1.16799104  |
| 1  | 5.66540337  | 1.04084682  | 0.20519109  | 1  | -5.32929659 | -0.25435320 | 2.27919102  |
| 1  | 5.58310318  | -0.28815320 | 1.37749100  | 1  | -3.86309648 | 1.43824673  | 0.16979109  |
| 6  | 4.40180302  | -0.22105318 | -1.90820897 | 1  | -5.10619688 | 2.04684687  | 1.28409100  |
| 1  | 4.48250341  | -0.90785325 | -2.75780892 | 8  | -5.30819702 | -2.44485307 | -0.73970890 |
| 1  | 4.93440342  | 0.70244682  | -2.16690898 | 6  | -4.59289694 | -3.27815318 | -1.67630899 |
| 1  | 3.34240341  | 0.01234680  | -1.78870893 | 1  | -3.66729665 | -2.79245305 | -1.98880899 |
| 1  | 4.55720329  | -5.46605349 | 0.19029109  | 1  | -5.21729660 | -3.49075317 | -2.54810905 |
| 8  | 0.44680330  | 1.13164675  | -1.76140893 | 1  | -4.37039661 | -4.20385313 | -1.14680898 |
| 15 | 0.30070332  | 2.21004677  | -2.78610897 | 6  | 2.62270331  | 3.63414693  | 2.48299098  |
| 8  | 0.18050334  | 3.71004701  | -2.23420906 | 1  | 2.17060351  | 4.21374655  | 3.29399109  |
| 8  | 1.58260334  | 2.40634680  | -3.72370887 | 1  | 3.47890353  | 4.18514681  | 2.08689094  |
| 6  | 1.46680331  | 4.36474657  | -2.39070892 | 1  | 2.99140334  | 2.68304682  | 2.87899113  |
| 6  | 2.04020333  | 3.77914691  | -3.68280888 | 6  | -2.05809665 | 3.32574701  | 4.37859106  |
| 1  | 1.27920330  | 5.43634653  | -2.46010900 | 1  | -2.30809665 | 4.34814644  | 4.08629084  |
| 1  | 2.07680345  | 4.11834669  | -1.51520896 | 1  | -1.31719673 | 3.35814691  | 5.18079090  |
| 8  | -0.92159665 | 1.96214676  | -3.74190903 | 1  | -2.95709658 | 2.83234692  | 4.75549126  |

---

## S1.10. Transesterification of PP

PP

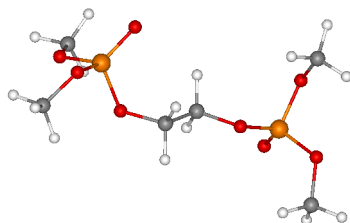

|                                              |                             |
|----------------------------------------------|-----------------------------|
| Zero-point vibrational energy                | 662155.7 (Joules/Mol)       |
|                                              | 158.25901 (Kcal/Mol)        |
| Zero-point correction=                       | 0.252202 (Hartree/Particle) |
| Thermal correction to Energy=                | 0.273321                    |
| Thermal correction to Enthalpy=              | 0.274265                    |
| Thermal correction to Gibbs Free Energy=     | 0.197927                    |
| Sum of electronic and zero-point Energies=   | -1522.311875                |
| Sum of electronic and thermal Energies=      | -1522.290756                |
| Sum of electronic and thermal Enthalpies=    | -1522.289812                |
| Sum of electronic and thermal Free Energies= | -1522.366150                |

| cartesian |             |             |             |    |             |             |             |  |  |  |  |
|-----------|-------------|-------------|-------------|----|-------------|-------------|-------------|--|--|--|--|
| 8         | -2.23931909 | -1.30730009 | 1.28460002  | 15 | 3.11028099  | -0.37279999 | -0.36570004 |  |  |  |  |
| 15        | -2.87011909 | -0.34270000 | 0.36739996  | 8  | 4.19738150  | 0.62959999  | 0.24689996  |  |  |  |  |
| 8         | -3.79121900 | 0.72490001  | 1.10769999  | 8  | 3.13768101  | -0.61720002 | -1.81729996 |  |  |  |  |
| 6         | -4.51551867 | 1.72620010  | 0.37159997  | 8  | 3.33588099  | -1.68499994 | 0.50709999  |  |  |  |  |
| 1         | -3.84041905 | 2.29600000  | -0.27230003 | 1  | -4.96001863 | 2.38569999  | 1.11660004  |  |  |  |  |
| 1         | -5.29891872 | 1.25830007  | -0.22840002 | 1  | -0.30411887 | 1.85730004  | -0.35800004 |  |  |  |  |
| 8         | -3.85401893 | -0.90130001 | -0.76230001 | 1  | -0.61371887 | 0.93699998  | 1.13250005  |  |  |  |  |
| 6         | -3.41521907 | -1.98600006 | -1.60169995 | 1  | 0.23648113  | -1.13279998 | 0.03799997  |  |  |  |  |
| 1         | -3.06591892 | -2.82200003 | -0.99180001 | 6  | 3.34458113  | -1.63849998 | 1.94540000  |  |  |  |  |
| 1         | -2.62231898 | -1.64650011 | -2.27300000 | 6  | 4.41398144  | 1.89820004  | -0.39650002 |  |  |  |  |
| 1         | -4.28501892 | -2.28920007 | -2.18359995 | 1  | 5.26738119  | 2.35189986  | 0.10699997  |  |  |  |  |
| 8         | -1.82561886 | 0.51059997  | -0.52860004 | 1  | 3.53478098  | 2.53740001  | -0.27940005 |  |  |  |  |
| 6         | -0.55301887 | 0.87229997  | 0.04279997  | 1  | 4.63858128  | 1.75410008  | -1.45560002 |  |  |  |  |
| 6         | 0.48948115  | -0.15080000 | -0.37120003 | 1  | 3.41308093  | -2.67340016 | 2.27940011  |  |  |  |  |
| 8         | 1.74268115  | 0.30109999  | 0.17809996  | 1  | 2.42268109  | -1.18889999 | 2.32279992  |  |  |  |  |
| 1         | 0.55938113  | -0.21260001 | -1.46070004 | 1  | 4.21018124  | -1.07360005 | 2.29820013  |  |  |  |  |

# I-1\_L\_PP

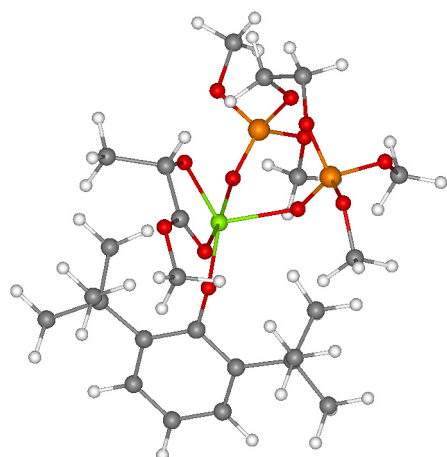

|                                              |                             |
|----------------------------------------------|-----------------------------|
| Zero-point vibrational energy                | 1805576.4 (Joules/Mol)      |
|                                              | 431.54311 (Kcal/Mol)        |
| Zero-point correction=                       | 0.687708 (Hartree/Particle) |
| Thermal correction to Energy=                | 0.736443                    |
| Thermal correction to Enthalpy=              | 0.737388                    |
| Thermal correction to Gibbs Free Energy=     | 0.603169                    |
| Sum of electronic and zero-point Energies=   | -2725.458342                |
| Sum of electronic and thermal Energies=      | -2725.409606                |
| Sum of electronic and thermal Enthalpies=    | -2725.408662                |
| Sum of electronic and thermal Free Energies= | -2725.542881                |

|    |             |             |             | cartesian |             |             |             |
|----|-------------|-------------|-------------|-----------|-------------|-------------|-------------|
| 12 | 0.36787078  | 0.46353373  | 0.43730843  | 8         | 3.91067076  | -0.15746626 | -2.42979169 |
| 8  | -1.40112925 | 0.02943373  | -0.10029157 | 6         | 3.40087080  | -1.47216618 | -2.75199175 |
| 6  | -2.64592934 | -0.34476626 | -0.32619157 | 1         | 2.31117082  | -1.48406625 | -2.71749163 |
| 6  | -3.05842924 | -0.71616632 | -1.65109158 | 1         | 3.80237079  | -2.19366646 | -2.03949165 |
| 6  | -4.37832928 | -1.12416625 | -1.86209154 | 1         | 3.75257063  | -1.69486618 | -3.75959158 |
| 1  | -4.70242929 | -1.41056621 | -2.85749173 | 8         | 0.17597078  | 2.65273356  | 0.11660843  |
| 6  | -5.30982924 | -1.17556620 | -0.83059156 | 8         | 1.46197081  | 1.17433381  | 1.89710844  |
| 6  | -4.91432905 | -0.79936630 | 0.44910842  | 6         | 0.75437081  | 3.25823355  | 1.01910841  |
| 1  | -5.65392923 | -0.83466631 | 1.24250841  | 6         | 1.53587079  | 2.52633357  | 2.10910845  |
| 6  | -3.61202908 | -0.38136625 | 0.73630846  | 6         | 1.03937078  | 2.94623375  | 3.50310826  |
| 6  | -2.07682920 | -0.66596627 | -2.83529162 | 1         | 2.57207084  | 2.91343355  | 2.00310850  |
| 6  | -3.24582934 | 0.03823373  | 2.17120838  | 1         | -6.33082914 | -1.49736619 | -1.02219152 |
| 6  | -1.54742932 | 0.76943368  | -3.02619171 | 8         | 0.75157082  | 4.58753347  | 1.10170841  |
| 1  | -1.06842923 | 1.13963377  | -2.11929154 | 6         | 0.00927079  | 5.28683376  | 0.08640844  |
| 1  | -0.82522923 | 0.80193371  | -3.85349154 | 1         | 0.06837079  | 6.34003353  | 0.35720843  |
| 1  | -2.37252927 | 1.44653380  | -3.27399158 | 1         | -1.02812910 | 4.94883347  | 0.07190844  |
| 6  | -0.91082925 | -1.64636624 | -2.60019159 | 1         | 0.45917079  | 5.11953354  | -0.89439154 |

|    |             |             |             |    |             |             |             |
|----|-------------|-------------|-------------|----|-------------|-------------|-------------|
| 1  | -0.38342923 | -1.41936624 | -1.67319155 | 8  | 4.10017061  | 1.30263376  | -0.36409158 |
| 1  | -1.29142928 | -2.67316628 | -2.54149175 | 6  | 4.86747074  | 0.39083374  | 0.44450843  |
| 1  | -0.19692922 | -1.60066628 | -3.43419170 | 6  | 4.03817081  | -0.43936628 | 1.39620841  |
| 6  | -2.73052931 | -1.07506621 | -4.16679144 | 8  | 3.58087063  | -1.62836623 | 0.68370843  |
| 1  | -3.10322928 | -2.10496640 | -4.14839172 | 1  | 3.18257070  | 0.14343372  | 1.77780843  |
| 1  | -3.56002927 | -0.41496626 | -4.44189167 | 15 | 2.19337082  | -2.31126642 | 1.07810843  |
| 1  | -1.98512936 | -1.01346624 | -4.96889162 | 8  | 2.27567077  | -3.57776642 | 0.11420844  |
| 6  | -4.44152927 | -0.04816628 | 3.13670826  | 8  | 0.96567076  | -1.49846625 | 0.93860847  |
| 1  | -5.26752949 | 0.60493368  | 2.83460832  | 8  | 2.32897067  | -2.84126639 | 2.57600832  |
| 1  | -4.82682943 | -1.06916618 | 3.23210835  | 1  | 2.24937081  | 3.52283359  | -3.64809155 |
| 1  | -4.12012911 | 0.27203372  | 4.13460827  | 1  | 1.13777077  | 4.02293348  | 3.67350841  |
| 6  | -2.15702939 | -0.89086628 | 2.74450827  | 1  | 1.63337088  | 2.41223359  | 4.24950838  |
| 1  | -1.26852918 | -0.93136632 | 2.11560845  | 1  | -0.00602922 | 2.65463376  | 3.63570833  |
| 1  | -1.85422921 | -0.56006628 | 3.74580836  | 1  | 5.47937059  | -0.24256626 | -0.20519157 |
| 1  | -2.54422927 | -1.91296625 | 2.82990837  | 1  | 5.52517080  | 1.04153371  | 1.02340841  |
| 6  | -2.78212929 | 1.50883377  | 2.18720841  | 1  | 4.67487049  | -0.77576631 | 2.22100830  |
| 1  | -3.60312939 | 2.16653371  | 1.87920845  | 6  | 3.37137079  | -3.76176643 | 2.94340825  |
| 1  | -2.47382927 | 1.80383372  | 3.19830823  | 6  | 1.05567074  | -4.31236649 | -0.15729158 |
| 1  | -1.95072937 | 1.67793381  | 1.50250840  | 1  | 0.73617077  | -4.85476637 | 0.73600847  |
| 8  | 1.75977087  | 0.37903374  | -1.14519155 | 1  | 1.30547071  | -5.01646614 | -0.94959152 |
| 15 | 3.10967064  | 0.88293368  | -1.52629149 | 1  | 0.26857078  | -3.63286638 | -0.48499158 |
| 8  | 3.11237073  | 2.25493360  | -2.31939173 | 1  | 3.26627064  | -3.92256641 | 4.01560831  |
| 6  | 2.09687090  | 2.49663353  | -3.31669164 | 1  | 4.35777092  | -3.34226632 | 2.72800827  |
| 1  | 2.22787070  | 1.81663382  | -4.16239166 | 1  | 3.25227070  | -4.70846653 | 2.41110826  |
| 1  | 1.10247076  | 2.38103366  | -2.88419175 |    |             |             |             |

### TS-12\_L\_PP

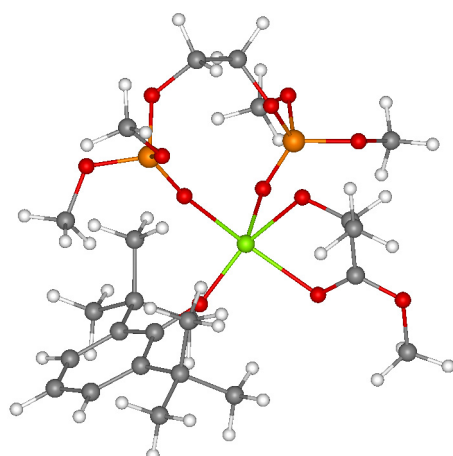

Zero-point vibrational energy

1804775.0 (Joules/Mol)

431.35159 (Kcal/Mol)

Zero-point correction=

0.687403 (Hartree/Particle)



|                                              |              |
|----------------------------------------------|--------------|
| Thermal correction to Energy=                | 0.735223     |
| Thermal correction to Enthalpy=              | 0.736168     |
| Thermal correction to Gibbs Free Energy=     | 0.602895     |
| Sum of electronic and zero-point Energies=   | -2725.440521 |
| Sum of electronic and thermal Energies=      | -2725.392700 |
| Sum of electronic and thermal Enthalpies=    | -2725.391756 |
| Sum of electronic and thermal Free Energies= | -2725.525029 |

| cartesian |             |             |             |    |             |             |             |
|-----------|-------------|-------------|-------------|----|-------------|-------------|-------------|
| 12        | 0.62231660  | 0.57682663  | -0.00058195 | 8  | 4.23031664  | -0.79087335 | -2.03178215 |
| 8         | -1.22688329 | 0.73242664  | -0.42718196 | 6  | 3.63361669  | -0.99977338 | -3.31778216 |
| 6         | -2.48148322 | 0.34672663  | -0.55478191 | 1  | 3.36951661  | -0.05037338 | -3.79058194 |
| 6         | -2.95438337 | -0.20377338 | -1.79568195 | 1  | 2.73191667  | -1.61217332 | -3.24398208 |
| 6         | -4.26728344 | -0.68097335 | -1.86168194 | 1  | 4.38621664  | -1.51377344 | -3.91908216 |
| 1         | -4.63638353 | -1.11477339 | -2.78548217 | 8  | 0.82891667  | 2.75272655  | 0.18431805  |
| 6         | -5.13828373 | -0.61227334 | -0.77858192 | 8  | 2.34171653  | 0.77862662  | 1.03791809  |
| 6         | -4.70238352 | -0.00527338 | 0.39561805  | 6  | 1.75461662  | 3.06232667  | 0.93321806  |
| 1         | -5.40718365 | 0.08302662  | 1.21621811  | 6  | 2.64671659  | 2.00992656  | 1.58101809  |
| 6         | -3.40558338 | 0.49722660  | 0.53681803  | 6  | 2.46111655  | 2.02762651  | 3.10681796  |
| 6         | -2.05678344 | -0.26597339 | -3.04658198 | 1  | 3.68371677  | 2.30722666  | 1.36071801  |
| 6         | -3.00618339 | 1.22762656  | 1.83341801  | 1  | -6.15288353 | -0.99517339 | -0.85968190 |
| 6         | -1.49108338 | 1.13152671  | -3.37488198 | 8  | 2.04041672  | 4.32622671  | 1.23181808  |
| 1         | -0.92408335 | 1.54482651  | -2.54088211 | 6  | 1.18021667  | 5.32562637  | 0.64821810  |
| 1         | -0.83548331 | 1.07732654  | -4.25328159 | 1  | 1.55241668  | 6.27922678  | 1.01901805  |
| 1         | -2.30718327 | 1.82542658  | -3.60618210 | 1  | 0.14741664  | 5.16482639  | 0.96081805  |
| 6         | -0.91138339 | -1.27627349 | -2.84108210 | 1  | 1.23891664  | 5.28562641  | -0.44098195 |
| 1         | -0.30458334 | -1.04087329 | -1.96748197 | 8  | 3.60231662  | -1.21097326 | 0.31551805  |
| 1         | -1.31428337 | -2.28807354 | -2.71278214 | 6  | 3.94781661  | -2.57207346 | 0.04541805  |
| 1         | -0.24888334 | -1.28937340 | -3.71608210 | 6  | 3.20511675  | -3.44857335 | 1.02921808  |
| 6         | -2.82658339 | -0.72647339 | -4.29788160 | 8  | 1.83431661  | -3.67577338 | 0.63721806  |
| 1         | -3.20078325 | -1.75237346 | -4.20918179 | 1  | 3.25131655  | -3.01527333 | 2.03231812  |
| 1         | -3.67318320 | -0.06977338 | -4.52538204 | 15 | 0.60821664  | -2.79227352 | 1.14951801  |
| 1         | -2.15218329 | -0.70407337 | -5.16168165 | 8  | -0.56738341 | -3.78557348 | 0.77211809  |
| 6         | -4.19128370 | 1.40282655  | 2.80061793  | 8  | 0.47641665  | -1.42607331 | 0.60451806  |
| 1         | -5.01188374 | 1.97072649  | 2.34961796  | 8  | 0.72001660  | -2.73997355 | 2.74291801  |
| 1         | -4.58938360 | 0.44542664  | 3.15461802  | 1  | 5.60171652  | 2.63332653  | -1.07848191 |
| 1         | -3.85428357 | 1.95832658  | 3.68371797  | 1  | 2.71571660  | 3.00052667  | 3.53861785  |
| 6         | -1.93318343 | 0.43572664  | 2.60431790  | 1  | 3.11511660  | 1.26482654  | 3.53621793  |
| 1         | -1.06328332 | 0.21172664  | 1.98731804  | 1  | 1.42961669  | 1.77672672  | 3.37151790  |
| 1         | -1.59728336 | 0.99352664  | 3.48761797  | 1  | 3.71101665  | -2.86617351 | -0.97828197 |
| 1         | -2.34028339 | -0.52107334 | 2.95151806  | 1  | 5.02541637  | -2.69487333 | 0.20041806  |

|    |             |             |             |   |             |             |             |
|----|-------------|-------------|-------------|---|-------------|-------------|-------------|
| 6  | -2.49928331 | 2.64632654  | 1.50081801  | 1 | 3.66291666  | -4.44087362 | 1.04471803  |
| 1  | -3.30218339 | 3.23372650  | 1.04091799  | 6 | 0.63631666  | -3.94397354 | 3.52591801  |
| 1  | -2.18908334 | 3.16352654  | 2.41881800  | 6 | -1.91568327 | -3.27657342 | 0.57421809  |
| 1  | -1.65948343 | 2.62172651  | 0.80641806  | 1 | -2.37258339 | -3.05557346 | 1.54061806  |
| 8  | 2.03211665  | 0.17412663  | -1.42518198 | 1 | -2.45868325 | -4.07847309 | 0.07721805  |
| 15 | 3.38831663  | -0.08517338 | -0.80728191 | 1 | -1.90618324 | -2.38167334 | -0.04778195 |
| 8  | 4.41131639  | 1.10862660  | -0.48228195 | 1 | 0.77101660  | -3.63837337 | 4.56291819  |
| 6  | 5.02941656  | 1.83672667  | -1.55538189 | 1 | 1.42151666  | -4.65137339 | 3.24451804  |
| 1  | 5.69471645  | 1.18762660  | -2.12798214 | 1 | -0.34108338 | -4.41487360 | 3.39971805  |
| 1  | 4.27601671  | 2.27902651  | -2.21378207 |   |             |             |             |

## I-2\_L\_PP

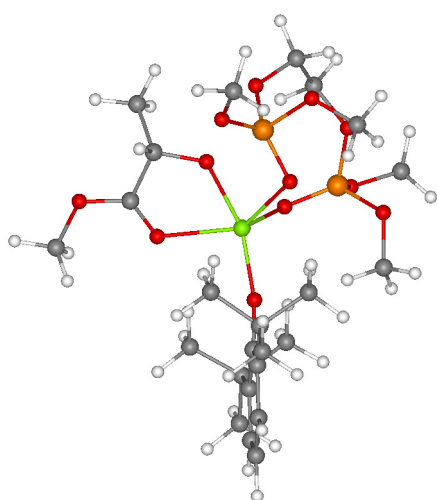

|                                              |                             |
|----------------------------------------------|-----------------------------|
| Zero-point vibrational energy                | 1808418.4 (Joules/Mol)      |
|                                              | 432.22237 (Kcal/Mol)        |
| Zero-point correction=                       | 0.688790 (Hartree/Particle) |
| Thermal correction to Energy=                | 0.736646                    |
| Thermal correction to Enthalpy=              | 0.737590                    |
| Thermal correction to Gibbs Free Energy=     | 0.605468                    |
| Sum of electronic and zero-point Energies=   | -2725.444065                |
| Sum of electronic and thermal Energies=      | -2725.396209                |
| Sum of electronic and thermal Enthalpies=    | -2725.395265                |
| Sum of electronic and thermal Free Energies= | -2725.527388                |

| cartesian |             |             |             |   |            |             |             |
|-----------|-------------|-------------|-------------|---|------------|-------------|-------------|
| 12        | 0.34140223  | 0.15011327  | 0.48016381  | 8 | 3.99010229 | 0.73071325  | -1.86023617 |
| 8         | -1.44929779 | -0.10288674 | -0.09183620 | 6 | 3.49400234 | 0.18591326  | -3.08083630 |
| 6         | -2.71569777 | 0.04901326  | -0.46133620 | 1 | 2.68550229 | 0.79351330  | -3.49953628 |
| 6         | -3.06579757 | 0.94911331  | -1.52443624 | 1 | 3.12040234 | -0.83118671 | -2.93643618 |
| 6         | -4.40279770 | 1.03461325  | -1.92433619 | 1 | 4.33750200 | 0.17741327  | -3.77713633 |

---

|    |             |             |             |    |             |             |             |
|----|-------------|-------------|-------------|----|-------------|-------------|-------------|
| 1  | -4.68119812 | 1.70191324  | -2.73293614 | 8  | -0.20199779 | 1.31361318  | 2.32796383  |
| 6  | -5.40589809 | 0.28671324  | -1.32003617 | 8  | 1.92750216  | 1.31231320  | 0.97726381  |
| 6  | -5.06979799 | -0.55868673 | -0.26933622 | 6  | 0.62450224  | 2.15781331  | 2.66356373  |
| 1  | -5.86699772 | -1.12268674 | 0.20246381  | 6  | 1.97620225  | 2.28361320  | 1.97796381  |
| 6  | -3.75639749 | -0.69748670 | 0.19066380  | 6  | 3.12760234  | 2.11081314  | 2.97006369  |
| 6  | -2.01339769 | 1.82251322  | -2.23423624 | 1  | 2.02890229  | 3.28971314  | 1.53806376  |
| 6  | -3.48299766 | -1.61798680 | 1.39786375  | 1  | -6.43689775 | 0.36891323  | -1.65613627 |
| 6  | -1.33159781 | 2.76551318  | -1.22193623 | 8  | 0.41370225  | 3.03161311  | 3.63756371  |
| 1  | -0.93169785 | 2.22471333  | -0.36293620 | 6  | -0.87029779 | 2.95181322  | 4.29386425  |
| 1  | -0.51129782 | 3.31981325  | -1.69363618 | 1  | -0.85949779 | 3.74291325  | 5.04126406  |
| 1  | -2.05579758 | 3.49121332  | -0.83503622 | 1  | -0.99199784 | 1.97501326  | 4.76406384  |
| 6  | -0.97759783 | 0.93971330  | -2.95693612 | 1  | -1.67149770 | 3.11051321  | 3.57076383  |
| 1  | -0.43049774 | 0.29641324  | -2.27033615 | 8  | 4.05610228  | 0.37361324  | 0.52346379  |
| 1  | -1.47949779 | 0.30791324  | -3.69883633 | 6  | 4.89310217  | -0.74898672 | 0.28826380  |
| 1  | -0.24429777 | 1.56241322  | -3.48473620 | 6  | 4.22980213  | -2.03328681 | 0.74276376  |
| 6  | -2.62879777 | 2.73311329  | -3.31293631 | 8  | 3.27770233  | -2.46608686 | -0.25753617 |
| 1  | -3.09069777 | 2.16031313  | -4.12423611 | 1  | 3.73800230  | -1.88448679 | 1.70766377  |
| 1  | -3.37839770 | 3.41871333  | -2.90363622 | 15 | 1.75490224  | -2.77148676 | 0.08296380  |
| 1  | -1.83549774 | 3.34461331  | -3.75813627 | 8  | 1.25020218  | -3.07228684 | -1.38283622 |
| 6  | -4.75289774 | -2.33278680 | 1.89516377  | 8  | 1.01220226  | -1.76468682 | 0.89446378  |
| 1  | -5.52169800 | -1.63208675 | 2.23776388  | 8  | 1.73140216  | -4.14338636 | 0.90346378  |
| 1  | -5.19329786 | -2.98008680 | 1.12866378  | 1  | 3.81750226  | 4.38581324  | -1.24303627 |
| 1  | -4.49199772 | -2.96908689 | 2.74866390  | 1  | 3.08230233  | 2.87691331  | 3.74886370  |
| 6  | -2.47339773 | -2.72508669 | 1.04366386  | 1  | 4.07390213  | 2.20151329  | 2.43496370  |
| 1  | -1.50509775 | -2.30488682 | 0.77746379  | 1  | 3.09060240  | 1.12181318  | 3.43486381  |
| 1  | -2.33049774 | -3.39778686 | 1.89866376  | 1  | 5.18850231  | -0.81568670 | -0.76153624 |
| 1  | -2.84419775 | -3.32368684 | 0.20276380  | 1  | 5.79010201  | -0.59288675 | 0.89756376  |
| 6  | -2.95329762 | -0.78358674 | 2.57976389  | 1  | 4.97610188  | -2.82858682 | 0.83516377  |
| 1  | -3.70839763 | -0.05528674 | 2.89796376  | 6  | 2.30860233  | -5.33378649 | 0.33846378  |
| 1  | -2.72659779 | -1.43148673 | 3.43666387  | 6  | -0.15099776 | -3.00168681 | -1.75353622 |
| 1  | -2.05069757 | -0.23588674 | 2.31376386  | 1  | -0.68769777 | -3.85318685 | -1.33103621 |
| 8  | 1.74660218  | 0.22021325  | -1.04163623 | 1  | -0.16259778 | -3.05048680 | -2.84093618 |
| 15 | 2.97830224  | 0.99301332  | -0.55293620 | 1  | -0.59749782 | -2.06588674 | -1.41333616 |
| 8  | 3.12290239  | 2.61561322  | -0.57363623 | 1  | 2.21220231  | -6.10688639 | 1.09986377  |
| 6  | 3.92340231  | 3.33441329  | -1.51903617 | 1  | 3.36410236  | -5.17928648 | 0.09856380  |
| 1  | 4.97260189  | 3.03871322  | -1.46013618 | 1  | 1.76720226  | -5.63068676 | -0.56283623 |
| 1  | 3.56330228  | 3.19011331  | -2.53973627 |    |             |             |             |

---

# TS-23\_L\_PP

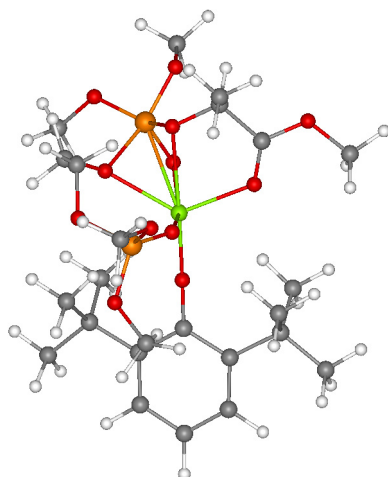

|                                              |                             |
|----------------------------------------------|-----------------------------|
| Zero-point vibrational energy                | 1809287.4 (Joules/Mol)      |
|                                              | 432.43006 (Kcal/Mol)        |
| Zero-point correction=                       | 0.689121 (Hartree/Particle) |
| Thermal correction to Energy=                | 0.735856                    |
| Thermal correction to Enthalpy=              | 0.736800                    |
| Thermal correction to Gibbs Free Energy=     | 0.606774                    |
| Sum of electronic and zero-point Energies=   | -2725.431937                |
| Sum of electronic and thermal Energies=      | -2725.385202                |
| Sum of electronic and thermal Enthalpies=    | -2725.384258                |
| Sum of electronic and thermal Free Energies= | -2725.514284                |

| cartesian |             |             |             |   |             |             |             |  |  |  |  |
|-----------|-------------|-------------|-------------|---|-------------|-------------|-------------|--|--|--|--|
| 12        | -0.35848781 | 0.22092885  | -0.20759629 | 8 | -3.80738783 | 1.87062883  | 2.01450372  |  |  |  |  |
| 8         | 1.50071216  | 0.33802885  | -0.07209629 | 6 | -3.49618769 | 1.44172883  | 3.33520365  |  |  |  |  |
| 6         | 2.80041218  | 0.45152885  | 0.17140371  | 1 | -2.43288779 | 1.20502889  | 3.43650365  |  |  |  |  |
| 6         | 3.26791215  | 1.17512882  | 1.31720376  | 1 | -4.08798790 | 0.56692886  | 3.62010360  |  |  |  |  |
| 6         | 4.64361191  | 1.21752882  | 1.56510377  | 1 | -3.74438787 | 2.27812886  | 3.99530363  |  |  |  |  |
| 1         | 5.01791191  | 1.75112891  | 2.43230367  | 8 | -0.97278780 | 0.94692886  | -2.04419637 |  |  |  |  |
| 6         | 5.56671190  | 0.59912884  | 0.72910368  | 8 | -3.36048770 | 0.19202885  | -0.80699629 |  |  |  |  |
| 6         | 5.11011219  | -0.06327115 | -0.40509629 | 6 | -2.05518794 | 1.25522888  | -2.54229641 |  |  |  |  |
| 1         | 5.84511185  | -0.51977116 | -1.05949628 | 6 | -3.40718770 | 0.70442885  | -2.11279631 |  |  |  |  |
| 6         | 3.75031209  | -0.14837116 | -0.71939629 | 6 | -3.78408766 | -0.43777114 | -3.06359625 |  |  |  |  |
| 6         | 2.30231214  | 1.92022896  | 2.25910354  | 1 | -4.13388777 | 1.51372886  | -2.20949626 |  |  |  |  |
| 6         | 3.31101227  | -0.85677117 | -2.01509643 | 1 | 6.63031197  | 0.64642888  | 0.95010370  |  |  |  |  |
| 6         | 1.51021218  | 2.98502874  | 1.47290373  | 8 | -2.13888788 | 2.07562876  | -3.57609630 |  |  |  |  |
| 1         | 0.95691222  | 2.55342889  | 0.63900369  | 6 | -0.89318782 | 2.60212874  | -4.08589649 |  |  |  |  |
| 1         | 0.79131216  | 3.49152875  | 2.12750363  | 1 | -1.17378783 | 3.23492885  | -4.92549658 |  |  |  |  |
| 1         | 2.19451213  | 3.73902893  | 1.06800377  | 1 | -0.24478783 | 1.78782880  | -4.41109657 |  |  |  |  |
| 6         | 1.34921217  | 0.93362892  | 2.96120358  | 1 | -0.39058784 | 3.18412876  | -3.31239629 |  |  |  |  |

|    |             |             |             |    |             |             |             |
|----|-------------|-------------|-------------|----|-------------|-------------|-------------|
| 1  | 0.75581223  | 0.35882887  | 2.25010371  | 8  | -3.43948770 | -0.39307114 | 1.41860378  |
| 1  | 1.91951227  | 0.22872886  | 3.57720375  | 6  | -4.38458824 | -1.37587118 | 1.08300376  |
| 1  | 0.65191215  | 1.46912885  | 3.61600375  | 6  | -3.75638771 | -2.52947116 | 0.32510370  |
| 6  | 3.04001212  | 2.67292881  | 3.38140368  | 8  | -2.67928767 | -3.11447120 | 1.11630380  |
| 1  | 3.59811234  | 1.99842882  | 4.03990364  | 1  | -3.36888766 | -2.18317103 | -0.63179630 |
| 1  | 3.73321223  | 3.42512894  | 2.99040365  | 15 | -1.17548776 | -2.95887113 | 0.66040373  |
| 1  | 2.30531216  | 3.19792891  | 4.00210381  | 8  | -0.43298781 | -3.15117121 | 2.04540372  |
| 6  | 4.50611210  | -1.37167120 | -2.83769631 | 8  | -0.81808782 | -1.73767114 | -0.11429629 |
| 1  | 5.18101215  | -0.56457114 | -3.14209628 | 8  | -0.81948781 | -4.21717119 | -0.25629631 |
| 1  | 5.09081221  | -2.12337112 | -2.29639626 | 1  | -3.73378778 | 4.38492870  | -0.62359631 |
| 1  | 4.13361216  | -1.84787118 | -3.75199628 | 1  | -3.85798788 | -0.07917115 | -4.09389639 |
| 6  | 2.43611217  | -2.08517122 | -1.70049620 | 1  | -4.75788784 | -0.83387113 | -2.76459646 |
| 1  | 1.54051208  | -1.81497109 | -1.14199626 | 1  | -3.04698777 | -1.24427116 | -3.01989627 |
| 1  | 2.12371230  | -2.58317113 | -2.62699628 | 1  | -4.80928802 | -1.74907112 | 2.02360368  |
| 1  | 3.00421214  | -2.81177115 | -1.10749626 | 1  | -5.20828819 | -0.98847115 | 0.47080371  |
| 6  | 2.54881215  | 0.13092884  | -2.92199636 | 1  | -4.48398781 | -3.33137107 | 0.17040370  |
| 1  | 3.20451212  | 0.95912886  | -3.21389627 | 6  | -1.11788785 | -5.55057144 | 0.19710371  |
| 1  | 2.21251225  | -0.37267113 | -3.83789635 | 6  | 1.01141214  | -3.01097107 | 2.09240365  |
| 1  | 1.67951226  | 0.55132884  | -2.41609645 | 1  | 1.48541212  | -3.83107114 | 1.54810381  |
| 8  | -1.62848783 | 1.24192882  | 0.82900369  | 1  | 1.27471209  | -3.05767107 | 3.14730358  |
| 15 | -3.15218782 | 1.11432886  | 0.68200368  | 1  | 1.32011223  | -2.05307126 | 1.67140377  |
| 8  | -3.70328784 | 2.40172887  | -0.22409630 | 1  | -0.73818779 | -6.22217131 | -0.57169628 |
| 6  | -3.66338778 | 3.74402881  | 0.26090372  | 1  | -2.19668794 | -5.68317127 | 0.30850372  |
| 1  | -4.50348806 | 3.94352889  | 0.92920369  | 1  | -0.62078786 | -5.75777149 | 1.14840376  |
| 1  | -2.72608781 | 3.94972873  | 0.78470373  |    |             |             |             |

### I-3\_L\_PP

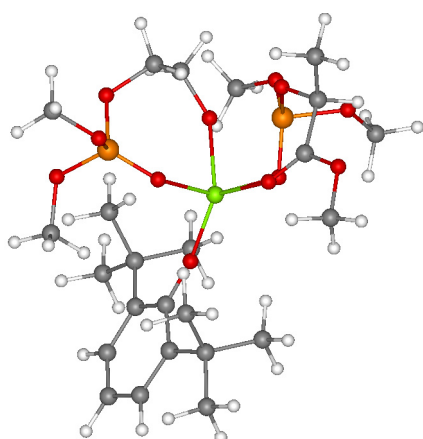

Zero-point vibrational energy

1805168.3 (Joules/Mol)

431.44557 (Kcal/Mol)

Zero-point correction=

0.687552 (Hartree/Particle)

Thermal correction to Energy=

0.735150

|                                              |              |
|----------------------------------------------|--------------|
| Thermal correction to Enthalpy=              | 0.736094     |
| Thermal correction to Gibbs Free Energy=     | 0.604724     |
| Sum of electronic and zero-point Energies=   | -2725.440129 |
| Sum of electronic and thermal Energies=      | -2725.392532 |
| Sum of electronic and thermal Enthalpies=    | -2725.391588 |
| Sum of electronic and thermal Free Energies= | -2725.522958 |

| cartesian |             |             |             |    |             |             |             |  |  |  |  |
|-----------|-------------|-------------|-------------|----|-------------|-------------|-------------|--|--|--|--|
| 12        | -0.57742542 | 0.12980369  | -0.12309286 | 8  | -3.41372538 | 2.28010368  | 1.83130717  |  |  |  |  |
| 8         | 1.24757457  | 0.56770366  | -0.31139287 | 6  | -2.53082538 | 2.55930376  | 2.92530727  |  |  |  |  |
| 6         | 2.55947447  | 0.71650368  | -0.31089285 | 1  | -1.48792553 | 2.37780356  | 2.66660714  |  |  |  |  |
| 6         | 3.23017454  | 1.25210369  | 0.83990717  | 1  | -2.81012559 | 1.94940376  | 3.78850722  |  |  |  |  |
| 6         | 4.62697458  | 1.31330371  | 0.83450711  | 1  | -2.67122555 | 3.61430359  | 3.17340708  |  |  |  |  |
| 1         | 5.15267467  | 1.70180368  | 1.70070720  | 8  | -1.87582541 | -0.51099634 | -1.76739287 |  |  |  |  |
| 6         | 5.38247442  | 0.90130365  | -0.25849286 | 8  | -3.82422543 | 0.18370366  | 0.03850714  |  |  |  |  |
| 6         | 4.72507429  | 0.44750369  | -1.39759278 | 6  | -3.03102541 | -0.41719633 | -2.15769291 |  |  |  |  |
| 1         | 5.32687473  | 0.16600367  | -2.25559282 | 6  | -4.23822546 | -0.04369632 | -1.29659283 |  |  |  |  |
| 6         | 3.33177447  | 0.35490367  | -1.46579278 | 6  | -5.28352547 | -1.15499628 | -1.28419280 |  |  |  |  |
| 6         | 2.44627452  | 1.79510367  | 2.05040717  | 1  | -4.66702557 | 0.86580366  | -1.72709286 |  |  |  |  |
| 6         | 2.65797448  | -0.10659632 | -2.77209282 | 1  | 6.46817446  | 0.95800364  | -0.23279285 |  |  |  |  |
| 6         | 1.48957467  | 2.91640377  | 1.59530711  | 8  | -3.37892556 | -0.63149631 | -3.42159271 |  |  |  |  |
| 1         | 0.76867455  | 2.57320356  | 0.85240710  | 6  | -2.30532551 | -0.95219630 | -4.33249331 |  |  |  |  |
| 1         | 0.94017464  | 3.31930375  | 2.45640707  | 1  | -2.78232551 | -1.08219635 | -5.30209303 |  |  |  |  |
| 1         | 2.06047463  | 3.74040365  | 1.15310717  | 1  | -1.80752540 | -1.87049627 | -4.01779318 |  |  |  |  |
| 6         | 1.66507459  | 0.66980368  | 2.75540709  | 1  | -1.58342552 | -0.13529631 | -4.36099291 |  |  |  |  |
| 1         | 0.96677452  | 0.17560366  | 2.07920718  | 8  | -1.96702552 | 0.29710367  | 1.47230721  |  |  |  |  |
| 1         | 2.35067463  | -0.09029632 | 3.14660716  | 6  | -2.57282543 | -0.48689634 | 2.47970724  |  |  |  |  |
| 1         | 1.09177446  | 1.06780362  | 3.60230708  | 6  | -2.58882546 | -1.97919631 | 2.21370721  |  |  |  |  |
| 6         | 3.36847448  | 2.41380358  | 3.11600709  | 8  | -1.28952539 | -2.58709621 | 2.49020720  |  |  |  |  |
| 1         | 4.06087446  | 1.68320370  | 3.54860711  | 1  | -2.90322542 | -2.19269633 | 1.18980718  |  |  |  |  |
| 1         | 3.95337439  | 3.24950361  | 2.71790719  | 15 | -0.30302542 | -2.87969637 | 1.28490722  |  |  |  |  |
| 1         | 2.75667453  | 2.80520368  | 3.93700719  | 8  | 1.06767464  | -3.02969623 | 2.05950713  |  |  |  |  |
| 6         | 3.67167449  | -0.32449633 | -3.90939283 | 8  | -0.34482542 | -1.89189637 | 0.17530714  |  |  |  |  |
| 1         | 4.23257446  | 0.58630365  | -4.14419317 | 8  | -0.67622542 | -4.31299639 | 0.68840718  |  |  |  |  |
| 1         | 4.38807440  | -1.12149632 | -3.68229294 | 1  | -4.45772552 | 4.27400351  | -1.26159286 |  |  |  |  |
| 1         | 3.13527441  | -0.62209630 | -4.81789303 | 1  | -5.64662552 | -1.35089636 | -2.29489279 |  |  |  |  |
| 6         | 1.93567443  | -1.45169628 | -2.56289291 | 1  | -6.12272549 | -0.83789635 | -0.66139281 |  |  |  |  |
| 1         | 1.19357467  | -1.40129638 | -1.76639283 | 1  | -4.87092543 | -2.07929635 | -0.87059283 |  |  |  |  |
| 1         | 1.43097448  | -1.76639628 | -3.48599291 | 1  | -2.04922533 | -0.32179633 | 3.43090725  |  |  |  |  |
| 1         | 2.65957451  | -2.23259640 | -2.30089283 | 1  | -3.61692548 | -0.17969632 | 2.61890721  |  |  |  |  |
| 6         | 1.66887450  | 0.96840370  | -3.26829290 | 1  | -3.27352548 | -2.46929622 | 2.91010714  |  |  |  |  |

|    |             |            |             |   |             |             |            |
|----|-------------|------------|-------------|---|-------------|-------------|------------|
| 1  | 2.19917440  | 1.90200365 | -3.48609281 | 6 | -0.69022542 | -5.47269630 | 1.54250717 |
| 1  | 1.18167448  | 0.63710368 | -4.19499302 | 6 | 2.32067442  | -2.87769628 | 1.33630717 |
| 1  | 0.90107459  | 1.18830371 | -2.52619290 | 1 | 2.43387461  | -3.68499637 | 0.60900712 |
| 8  | -1.62772536 | 1.85010362 | -0.24229285 | 1 | 3.10037446  | -2.94269633 | 2.09270716 |
| 15 | -2.94932556 | 1.53750372 | 0.46130714  | 1 | 2.35667443  | -1.90749633 | 0.84010708 |
| 8  | -4.00302553 | 2.47680378 | -0.43429288 | 1 | -0.96532542 | -6.31249619 | 0.90590715 |
| 6  | -3.70642543 | 3.85910368 | -0.58469284 | 1 | -1.42842531 | -5.35289621 | 2.33960724 |
| 1  | -3.77262545 | 4.37980366 | 0.37770715  | 1 | 0.29857457  | -5.64229631 | 1.97530723 |
| 1  | -2.70922542 | 4.00260353 | -1.01279283 |   |             |             |            |

### TS-34\_L\_PP

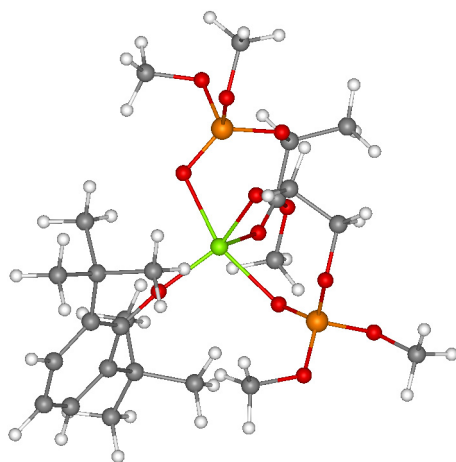

|                                              |                             |
|----------------------------------------------|-----------------------------|
| Zero-point vibrational energy                | 1808585.4 (Joules/Mol)      |
|                                              | 432.26228 (Kcal/Mol)        |
| Zero-point correction=                       | 0.688854 (Hartree/Particle) |
| Thermal correction to Energy=                | 0.736437                    |
| Thermal correction to Enthalpy=              | 0.737381                    |
| Thermal correction to Gibbs Free Energy=     | 0.607186                    |
| Sum of electronic and zero-point Energies=   | -2725.439618                |
| Sum of electronic and thermal Energies=      | -2725.392034                |
| Sum of electronic and thermal Enthalpies=    | -2725.391090                |
| Sum of electronic and thermal Free Energies= | -2725.521285                |

| cartesian |             |             |             |   |            |             |             |
|-----------|-------------|-------------|-------------|---|------------|-------------|-------------|
| 12        | 0.47402164  | 0.07619025  | 0.00941206  | 8 | 3.29002166 | -1.74690974 | 2.01311207  |
| 8         | -1.30277836 | -0.54150975 | -0.20968795 | 6 | 4.58232164 | -2.22970963 | 2.42051196  |
| 6         | -2.59367824 | -0.81750977 | -0.18918794 | 1 | 5.37522173 | -1.58140981 | 2.03911209  |
| 6         | -3.20347834 | -1.38490975 | 0.98171210  | 1 | 4.74852180 | -3.25290966 | 2.07901192  |
| 6         | -4.58997822 | -1.56490982 | 0.99471211  | 1 | 4.57232141 | -2.19600964 | 3.51021194  |
| 1         | -5.07137823 | -1.97240984 | 1.87771213  | 8 | 1.74202168 | 0.51119024  | -1.72988796 |
| 6         | -5.39067841 | -1.25010979 | -0.09848794 | 8 | 3.84102154 | -0.31190974 | -0.07748793 |

---

|    |             |             |             |    |             |             |             |
|----|-------------|-------------|-------------|----|-------------|-------------|-------------|
| 6  | -4.78577852 | -0.78040975 | -1.25968790 | 6  | 2.84892154  | 0.34359026  | -2.20928812 |
| 1  | -5.41747856 | -0.57960975 | -2.11898804 | 6  | 4.09212160  | -0.15790977 | -1.47028792 |
| 6  | -3.40647840 | -0.57040977 | -1.34758794 | 6  | 5.26842165  | 0.80039024  | -1.61598790 |
| 6  | -2.36577845 | -1.84230971 | 2.19181204  | 1  | 4.34872150  | -1.12800980 | -1.91298795 |
| 6  | -2.79007840 | -0.10380976 | -2.68028808 | 1  | -6.46747828 | -1.39650977 | -0.05578794 |
| 6  | -1.32717836 | -2.89080954 | 1.74351203  | 8  | 3.11882162  | 0.56239027  | -3.49328804 |
| 1  | -0.65597838 | -2.50510955 | 0.97661209  | 6  | 2.00532150  | 0.99909025  | -4.30578756 |
| 1  | -0.72047836 | -3.21440959 | 2.59911203  | 1  | 2.41352177  | 1.11969030  | -5.30738783 |
| 1  | -1.83637834 | -3.77280974 | 1.33841205  | 1  | 1.61422169  | 1.94399023  | -3.92658806 |
| 6  | -1.66717839 | -0.65200979 | 2.87551188  | 1  | 1.21662164  | 0.24629024  | -4.29348803 |
| 1  | -1.01687837 | -0.10970975 | 2.18871188  | 8  | 1.77232170  | 0.22499025  | 1.44401205  |
| 1  | -2.41157842 | 0.04899025  | 3.27051187  | 6  | 2.11892176  | 0.91979021  | 2.58161187  |
| 1  | -1.05117834 | -0.99730980 | 3.71491194  | 6  | 2.10892153  | 2.43069029  | 2.41441202  |
| 6  | -3.22477841 | -2.51570964 | 3.27811193  | 8  | 0.75102162  | 2.97189045  | 2.31091189  |
| 1  | -3.96557856 | -1.83410978 | 3.71111202  | 1  | 2.68582153  | 2.72399044  | 1.53171206  |
| 1  | -3.74977827 | -3.39950967 | 2.90041208  | 15 | 0.08842164  | 3.26229024  | 0.89581209  |
| 1  | -2.57397842 | -2.84770966 | 4.09541225  | 8  | -1.34837830 | 3.81209040  | 1.27231205  |
| 6  | -3.82687855 | -0.04190975 | -3.81658792 | 8  | 0.12012164  | 2.13219023  | -0.06808794 |
| 1  | -4.30157852 | -1.01220977 | -3.99788785 | 8  | 0.81512165  | 4.53249025  | 0.27001208  |
| 1  | -4.61387825 | 0.69569021  | -3.62558794 | 1  | 3.94652176  | -4.60081005 | -1.00788796 |
| 1  | -3.32537842 | 0.25689024  | -4.74478769 | 1  | 5.52542162  | 0.93429023  | -2.66778803 |
| 6  | -2.20197845 | 1.31279027  | -2.54118800 | 1  | 6.13002157  | 0.38509023  | -1.08918786 |
| 1  | -1.44327831 | 1.36849022  | -1.76188791 | 1  | 5.02762175  | 1.77279019  | -1.17938793 |
| 1  | -1.75047827 | 1.63729024  | -3.48858809 | 1  | 1.46462166  | 0.67069024  | 3.43571186  |
| 1  | -2.99377847 | 2.02879024  | -2.29108810 | 1  | 3.14712167  | 0.66829026  | 2.90121198  |
| 6  | -1.70507836 | -1.10020971 | -3.13858795 | 1  | 2.52732158  | 2.92199039  | 3.29761195  |
| 1  | -2.14507842 | -2.08880973 | -3.31108809 | 6  | 0.80462164  | 5.79749012  | 0.95781207  |
| 1  | -1.25827837 | -0.76510978 | -4.08458757 | 6  | -2.41547847 | 2.89459038  | 1.62671208  |
| 1  | -0.91647840 | -1.21110976 | -2.39378810 | 1  | -3.33447838 | 3.47609043  | 1.57271206  |
| 8  | 1.54832160  | -1.73920977 | -0.07208794 | 1  | -2.25787830 | 2.53049040  | 2.64281201  |
| 15 | 2.93332171  | -1.53810978 | 0.47121206  | 1  | -2.45607829 | 2.06219029  | 0.92241210  |
| 8  | 3.83122158  | -2.73170972 | -0.21558794 | 1  | 1.44572163  | 6.46079016  | 0.37791207  |
| 6  | 3.22722173  | -4.01490974 | -0.43328795 | 1  | 1.20132160  | 5.69149017  | 1.97101212  |
| 1  | 3.02622175  | -4.52020979 | 0.51761210  | 1  | -0.21127835 | 6.19588995  | 0.99351209  |
| 1  | 2.29222155  | -3.91160941 | -0.98758793 |    |             |             |             |

---



# I-4\_L\_PP

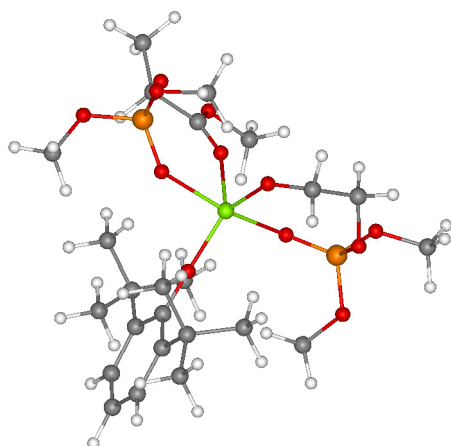

|                                              |                             |
|----------------------------------------------|-----------------------------|
| Zero-point vibrational energy                | 1804531.9 (Joules/Mol)      |
|                                              | 431.29349 (Kcal/Mol)        |
| Zero-point correction=                       | 0.687310 (Hartree/Particle) |
| Thermal correction to Energy=                | 0.736113                    |
| Thermal correction to Enthalpy=              | 0.737057                    |
| Thermal correction to Gibbs Free Energy=     | 0.601785                    |
| Sum of electronic and zero-point Energies=   | -2725.452142                |
| Sum of electronic and thermal Energies=      | -2725.403339                |
| Sum of electronic and thermal Enthalpies=    | -2725.402395                |
| Sum of electronic and thermal Free Energies= | -2725.537668                |

| cartesian |             |             |             |   |             |             |             |  |  |  |  |
|-----------|-------------|-------------|-------------|---|-------------|-------------|-------------|--|--|--|--|
| 12        | -0.38796747 | -0.72640973 | 0.54118788  | 8 | -4.01126766 | -0.06290971 | 2.70028782  |  |  |  |  |
| 8         | 0.65093255  | 0.79829031  | 0.02078790  | 6 | -3.39076734 | -1.18350971 | 3.39798784  |  |  |  |  |
| 6         | 1.40003252  | 1.85789025  | -0.20511210 | 1 | -2.35816741 | -1.33740962 | 3.06038785  |  |  |  |  |
| 6         | 2.23993254  | 2.40469027  | 0.82638788  | 1 | -3.99876738 | -2.07030964 | 3.20798779  |  |  |  |  |
| 6         | 3.07333255  | 3.48229027  | 0.51288790  | 1 | -3.42436743 | -0.92510974 | 4.45608807  |  |  |  |  |
| 1         | 3.72493267  | 3.89609027  | 1.27548790  | 8 | -1.87836754 | -1.46190965 | -0.93021208 |  |  |  |  |
| 6         | 3.10073256  | 4.06059027  | -0.75241208 | 8 | -4.24816751 | -0.62060970 | 0.28228790  |  |  |  |  |
| 6         | 2.24873257  | 3.56549025  | -1.73391211 | 6 | -2.89836740 | -1.34080970 | -1.58281219 |  |  |  |  |
| 1         | 2.26033258  | 4.04269028  | -2.70851207 | 6 | -4.10356760 | -0.50570971 | -1.14301217 |  |  |  |  |
| 6         | 1.39043248  | 2.48789024  | -1.49781215 | 6 | -5.42566776 | -0.90010971 | -1.77581215 |  |  |  |  |
| 6         | 2.21833253  | 1.85359037  | 2.26518774  | 1 | -3.85996747 | 0.53089029  | -1.40981221 |  |  |  |  |
| 6         | 0.44243255  | 2.00979018  | -2.61311221 | 1 | 3.76353264  | 4.89619064  | -0.96451205 |  |  |  |  |
| 6         | 0.80223250  | 1.99449027  | 2.85988784  | 8 | -3.06526732 | -1.89360964 | -2.77691221 |  |  |  |  |
| 1         | 0.04893254  | 1.50049031  | 2.24638796  | 6 | -1.93456745 | -2.64400983 | -3.28341222 |  |  |  |  |
| 1         | 0.76393259  | 1.56149030  | 3.86728787  | 1 | -2.24276733 | -2.98920989 | -4.26831198 |  |  |  |  |
| 1         | 0.53263259  | 3.05439019  | 2.93768787  | 1 | -1.72206748 | -3.48400974 | -2.62131214 |  |  |  |  |
| 6         | 2.67453265  | 0.38279027  | 2.30448794  | 1 | -1.05716741 | -2.00090981 | -3.34591222 |  |  |  |  |

---

|    |             |             |             |    |             |             |             |
|----|-------------|-------------|-------------|----|-------------|-------------|-------------|
| 1  | 2.02433252  | -0.26020971 | 1.71198785  | 8  | -0.55206746 | -1.83610964 | 2.08548784  |
| 1  | 3.69533253  | 0.28689027  | 1.91738784  | 6  | 0.09333253  | -2.75250983 | 2.87188792  |
| 1  | 2.66963267  | 0.00529030  | 3.33418775  | 6  | 0.74723256  | -3.90190983 | 2.11448789  |
| 6  | 3.16533256  | 2.62369013  | 3.20368791  | 8  | 1.95353258  | -3.46450973 | 1.40668786  |
| 1  | 4.21393251  | 2.54339027  | 2.89658785  | 1  | 0.04343253  | -4.34320974 | 1.40078783  |
| 1  | 2.90723252  | 3.68579030  | 3.27358794  | 15 | 1.89873254  | -3.03970981 | -0.11501210 |
| 1  | 3.08913255  | 2.20309019  | 4.21308804  | 8  | 3.39353251  | -2.55710983 | -0.33981210 |
| 6  | 0.55203259  | 2.86239028  | -3.88961220 | 8  | 0.83893251  | -2.08250976 | -0.52821207 |
| 1  | 0.31283250  | 3.91569018  | -3.70821214 | 8  | 1.72843254  | -4.38480949 | -0.97051209 |
| 1  | 1.54893255  | 2.80939031  | -4.34031200 | 1  | -4.24776745 | 3.79259038  | 0.98168790  |
| 1  | -0.16076747 | 2.48919034  | -4.63471174 | 1  | -5.37286758 | -0.80860972 | -2.86171222 |
| 6  | 0.77123249  | 0.56139028  | -3.02401209 | 1  | -6.20836782 | -0.23820971 | -1.40001214 |
| 1  | 0.70463252  | -0.12720971 | -2.18131208 | 1  | -5.68486738 | -1.93020964 | -1.52121210 |
| 1  | 0.08603254  | 0.22599031  | -3.81541204 | 1  | 0.87803245  | -2.29950976 | 3.50768781  |
| 1  | 1.78863251  | 0.50719029  | -3.42901206 | 1  | -0.60706747 | -3.25490975 | 3.57468796  |
| 6  | -1.02146745 | 2.11659026  | -2.13811207 | 1  | 1.10273254  | -4.67660952 | 2.80018783  |
| 1  | -1.28306746 | 3.16509032  | -1.95491219 | 6  | 2.68163252  | -5.45170975 | -0.82371211 |
| 1  | -1.70306754 | 1.73349035  | -2.91111207 | 6  | 3.67973256  | -1.34310961 | -1.08001220 |
| 1  | -1.17756748 | 1.56379032  | -1.21041214 | 1  | 3.59763265  | -1.53980970 | -2.15111208 |
| 8  | -2.03396749 | 0.48629028  | 1.09228790  | 1  | 4.70493221  | -1.07930970 | -0.82451212 |
| 15 | -3.50476742 | 0.39079028  | 1.27998781  | 1  | 2.99973273  | -0.54220968 | -0.78981209 |
| 8  | -4.26746750 | 1.75809038  | 1.01208782  | 1  | 2.35123253  | -6.24880934 | -1.48931217 |
| 6  | -3.68266749 | 3.00029016  | 1.47058785  | 1  | 2.69943261  | -5.81480932 | 0.20728791  |
| 1  | -3.79136729 | 3.07969022  | 2.55438781  | 1  | 3.67973256  | -5.11460972 | -1.11431217 |
| 1  | -2.63076735 | 3.05269027  | 1.18588781  |    |             |             |             |

---

## S2. Polymerization experiments

The common reaction protocol of the polymerization experiments was presented in the section 4.3 of the manuscript. NMR spectra of the reaction mixtures and separated polymer samples are given below.

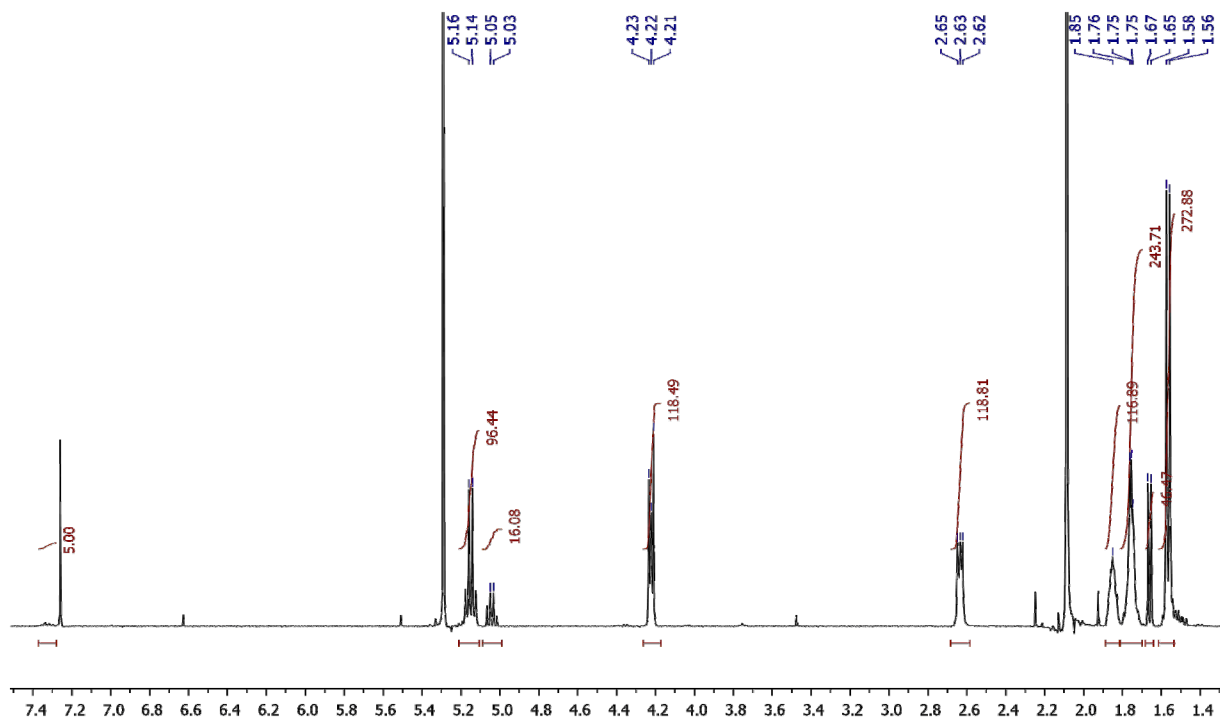

**Figure S1.** <sup>1</sup>H NMR spectrum of the probe taken from  $\epsilon$ -CL/*L*-LA reaction mixture after 10 min (Table 3, rin 1a).

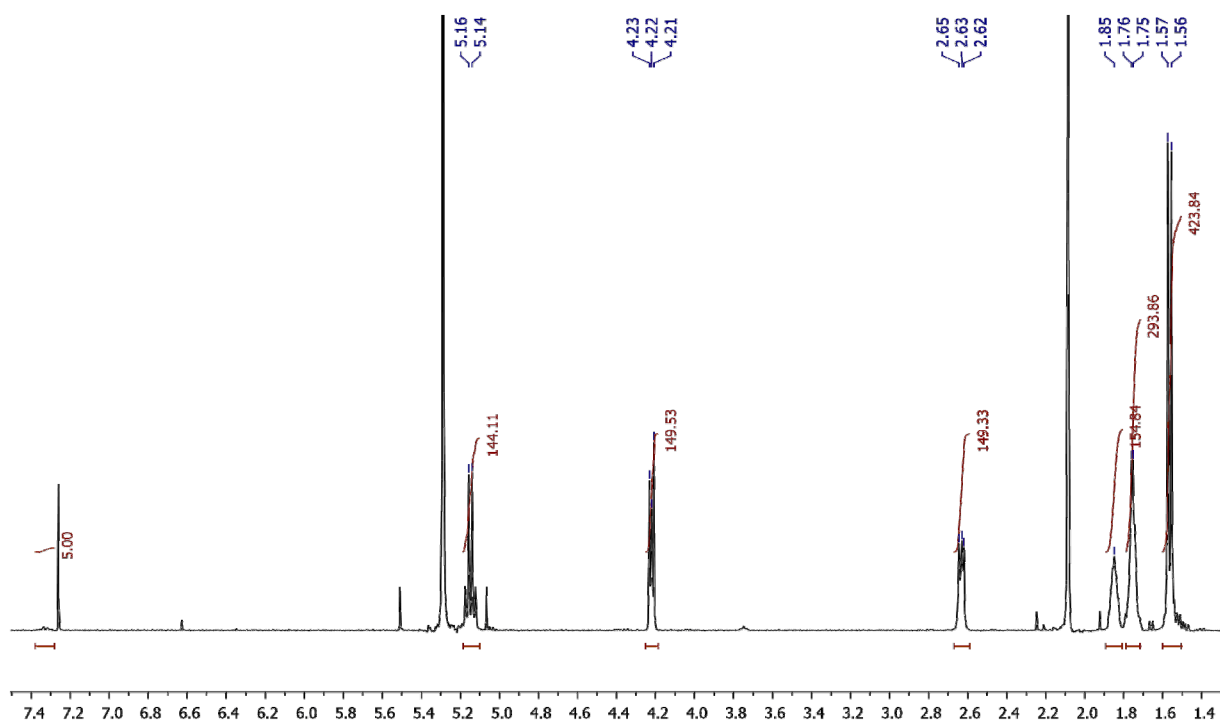

**Figure S2.** <sup>1</sup>H NMR spectrum of the probe taken from  $\epsilon$ -CL/*L*-LA reaction mixture after 30 h (Table 3, rin 1b).

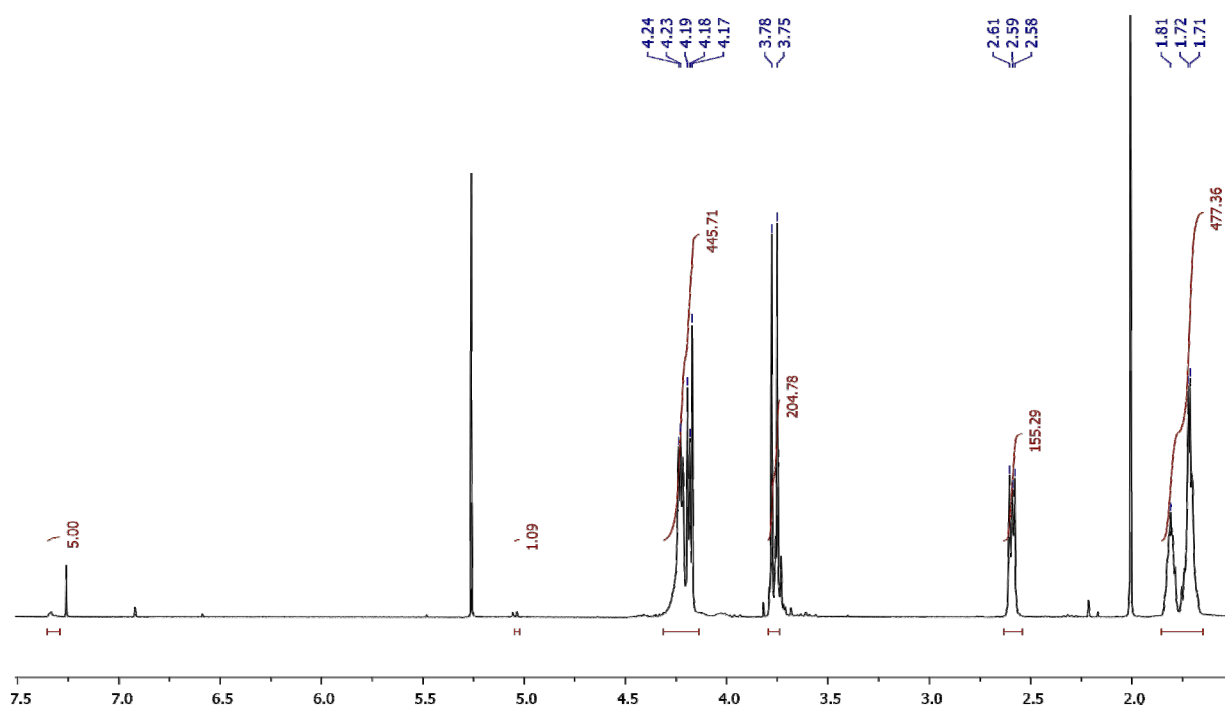

**Figure S3.**  $^1\text{H}$  NMR spectrum of the probe taken from  $\epsilon\text{-CL/MeOEP}$  reaction mixture after 10 min (Table 3, rin 2a).

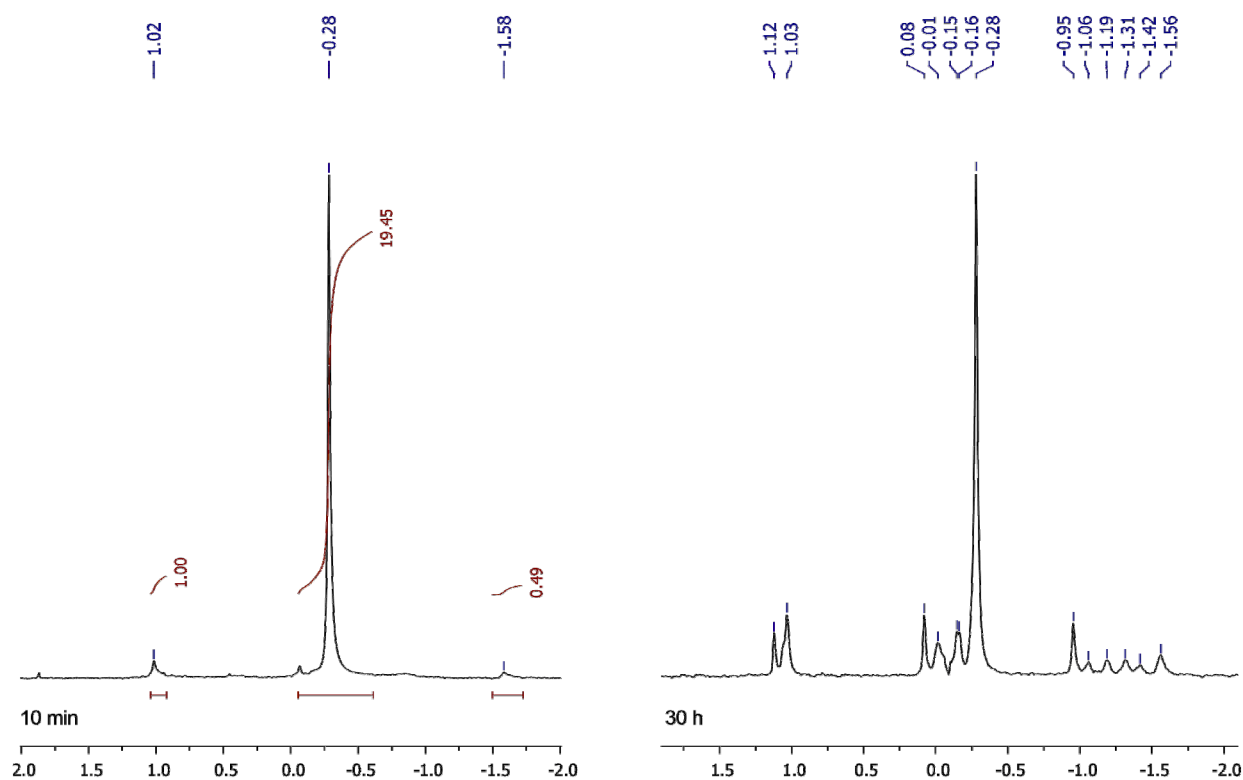

**Figure S4.**  $^{31}\text{P}$   $\{^1\text{H}\}$  NMR spectra of the probes taken from  $\epsilon\text{-CL/L-LA}$  reaction mixture after 10 min and 30 h (Table 3, rins 1a and 1b, respectively).
